# Supplementary material for: Codon usage bias controls mRNA and protein abundance in trypanosomatids
Source: eLife journal article supplement (doi:10.7554/elife.32496), 2018-03-15
Supplement: supp [file elife-32496-supp-v1.zip]

Archive with 4 entries (4 files):
- elife_poa_e32496_Transparent_Reporting_File.docx
- elife_poa_e32496_Figure_6_figure_supplement_1.pdf
- elife_poa_e32496_Figure_5_figure_supplement_1.pdf
- elife_poa_e32496_Supplementary_File_1.xlsx
