# Supplementary material for: Codon usage bias controls mRNA and protein abundance in trypanosomatids
Source: eLife journal article supplement (doi:10.7554/elife.32496), 2018-03-15
Supplement: supp [file elife-32496-supp-v1.zip › elife_poa_e32496_Supplementary_File_1.xlsx]

## Sheet: Sheet 1. Synthetic genes
Synthetic gLUC genes
gLUC (high: CAI - 0.906)	ATGAAGCCGACGGAGAACAACGAGGACTTCAACATCGTGGCGGTGGCGTCGAACTTCGCGACGACGGACCTGGACGCGGACCGCGGCAAGCTGCCGGGCAAGAAGCTGCCGCTGGAGGTGCTGAAGGAGATGGAGGCGAACGCGCGCAAGGCGGGCTGCACGCGCGGCTGCCTGATCTGCCTGTCGCACATCAAGTGCACGCCGAAGATGAAGAAGTTCATCCCGGGCCGCTGCCACACGTACGAGGGCGACAAGGAGTCGGCGCAGGGCGGCATCGGCGAGGCGATCGTGGACATCCCGGAGATCCCGGGCTTCAAGGACCTGGAGCCGATGGAGCAGTTCATCGCGCAGGTGGACCTGTGCGTGGACTGCACGACGGGCTGCCTGAAGGGCCTGGCG…
gLUC (medium: CAI - 0.636)	ATGAAGCCAACGGAAAACAATGAGGATTTCAATATCGTAGCGGTAGCGAGTAACTTTGCGACTACGGATCTGGATGCGGATCGCGGAAAGTTACCGGGAAAGAAACTGCCACTGGAAGTGTTAAAGGAAATGGAAGCGAATGCGAGAAAGGCAGGCTGTACGAGAGGCTGTCTGATATGCTTATCGCATATCAAATGCACTCCGAAAATGAAAAAGTTTATCCCAGGCAGATGCCATACGTATGAGGGAGACAAAGAGAGTGCGCAAGGCGGAATCGGAGAGGCAATCGTAGACATACCGGAAATCCCAGGCTTTAAGGATCTGGAACCGATGGAGCAATTCATAGCGCAAGTGGATCTGTGTGTGGATTGCACTACGGGATGCTTAAAGGGACTGGCA…
gLUC (low: CAI - 0.445)	ATGAAACCAACTGAAAATAATGAAGATTTTAATATAGTAGCAGTAGCAAGTAATTTTGCAACTACTGATTTAGATGCAGATAGAGGAAAATTACCAGGAAAAAAATTACCATTAGAAGTATTAAAAGAAATGGAAGCAAATGCAAGAAAAGCAGGATGTACTAGAGGATGTTTAATATGTTTAAGTCATATAAAATGTACTCCAAAAATGAAAAAATTTATACCAGGAAGATGTCATACTTATGAAGGAGATAAAGAAAGTGCACAAGGAGGAATAGGAGAAGCAATAGTAGATATACCAGAAATACCAGGATTTAAAGATTTAGAACCAATGGAACAATTTATAGCACAAGTAGATTTATGTGTAGATTGTACTACTGGATGTTTAAAAGGATTAGCA…
Synthetic GFP genes
GFP(high: CAI - 0.920)	ATGGTGTCGAAGGGCGAGGAGCTGTTCACGGGCGTGGTGCCGATCCTGGTGGAGCTGGACGGCGACGTGAACGGCCACAAGTTCTCGGTGTCGGGCGAGGGCGAGGGCGACGCGACGTACGGCAAGCTGACGCTGAAGTTCATCTGCACGACGGGCAAGCTGCCGGTGCCGTGGCCGACGCTGGTGACGACGCTGACGTACGGCGTGCAGTGCTTCTCGCGCTACCCGGACCACATGAAGCAGCACGACTTCTTCAAGTCGGCGATGCCGGAGGGCTACGTGCAGGAGCGCACGATCTTCTTCAAGGACGACGGCAACTACAAGACGCGCGCGGAGGTGAAGTTCGAGGGCGACACGCTGGTGAACCGCATCGAGCTGAAGGGCATCGACTTCAAGGAG…
GFP(medium: CAI - 0.648)	ATGGTGAGTAAGGGAGAGGAACTGTTTACGGGAGTGGTACCGATACTGGTAGAGTTAGACGGAGACGTAAACGGACACAAATTCAGTGTGAGTGGCGAAGGCGAAGGCGATGCGACTTACGGAAAGTTAACGTTAAAGTTTATCTGTACGACTGGCAAACTGCCAGTGCCATGGCCAACGTTAGTGACTACGTTAACGTATGGCGTACAGTGTTTCAGTCGCTATCCGGATCACATGAAGCAACACGATTTCTTTAAGAGTGCGATGCCGGAAGGCTATGTGCAAGAGAGAACGATATTCTTTAAGGATGACGGAAACTATAAGACTCGCGCAGAGGTAAAGTTTGAGGGAGACACTCTGGTAAACAGAATCGAACTGAAAGGCATAGACTTTAAGGAA…
GFP(low: CAI - 0.440)	ATGGTAAGTAAAGGAGAAGAATTATTTACTGGAGTAGTACCAATATTAGTAGAATTAGATGGAGATGTAAATGGACATAAATTTAGTGTAAGTGGAGAAGGAGAAGGAGATGCAACTTATGGAAAATTAACTTTAAAATTTATATGTACTACTGGAAAATTACCAGTACCATGGCCAACTTTAGTAACTACTTTAACTTATGGAGTACAATGTTTTAGTAGATATCCAGATCATATGAAACAACATGATTTTTTTAAAAGTGCAATGCCAGAAGGATATGTACAAGAAAGAACTATATTTTTTAAAGATGATGGAAATTATAAAACTAGAGCAGAAGTAAAATTTGAAGGAGATACTTTAGTAAATAGAATAGAATTAAAAGGAATAGATTTTAAAGAA…

## Sheet: Sheet 2. Expression data
					Transcriptome data
Gene ID	Product Description	Length (kbp)	CAI	Peptides / kbp	Raw count 1	Raw count 2	Raw count 3	(RPKM)	Relative expression (predicted)	Estimated mRNAs/cell (A)	Estimated mRNAs/cell (B)	Estimated proteins/cell (A)	Estimated proteins/cell (B)
Tb927.1.1000	developmentally regulated phosphoprotein	1.26	0.73	3.95883	2263	3909	3693	68.0322	0.696325	2.04784	2.99606	6244.38	2349.32		Reference-set for the CAI calculator
Tb927.1.1240	cytidine triphosphate synthase, putative	1.767	0.724	12.9944	1878	3357	3321	41.8615	0.684121	1.26007	2.53902	3935.08	1074.95		A: see tritrypdb.org
Tb927.1.1380	serine/threonine protein phosphatase 2A regulatory subunit, putative	1.719	0.699	6.38792	153	393	273	4.03213	0.659667	0.121371	1.8223	1559.93	57.1883		D: Sharp & Li method
Tb927.1.1420	conserved protein, unknown function	1.989	0.702	2.00803	2358	3915	3980	44.8593	0.65969	1.35031	1.82289	1561.33	636.612		E: Data from Urbaniak et al., 2012
Tb927.1.1470	conserved protein, unknown function	1.755	0.751	2.27531	181	327	383	4.3488	0.711257	0.130903	3.66863	10986.5	215.779		J: CAI - (SQRT length * 0.03)
Tb927.1.1500	conserved protein, unknown function	1.992	0.708	2.50627	127	221	226	2.49459	0.665659	0.0750897	1.97658	1956.88	40.9202		K: Based on RPKM and 19,000 mRNAs/bloodstream cell
Tb927.1.1540	Tubulin/FtsZ family, putative	1.953	0.699	2.55624	1781	3089	2906	34.6185	0.657075	1.04205	1.75936	1414.22	461.062		L: Based on Fig 6C trendline, prediction in column J and 19,000 mRNAs/bloodstream cell
Tb927.1.1560	vesicular-fusion protein nsf, putative	2.175	0.719	11.9376	1929	3434	3416	34.912	0.674756	1.05088	2.23616	2760.98	714.204		M: Based on Fig 7 trendline, predictions in column J and 100 million molecules / bloodstream cell
Tb927.1.1620	ATP-dependent DEAD/H RNA helicase, putative	2.217	0.696	2.25225	1715	2898	2880	29.3949	0.651331	0.884814	1.6275	1137.97	340.542		N: As in M but adjusted using mRNA levels - estimate A/estimate B - and 100 million molecules / bloodstream cell
Tb927.1.1670	ARM-like helical domain-containing protein	3.243	0.721	11.7067	3333	5534	6083	39.9835	0.666975	1.20354	2.01219	2056.82	677.17
Tb927.1.1700	AATF protein, putative	1.479	0.716	3.37382	1037	1777	1713	26.603	0.679516	0.800777	2.38527	3305.76	610.876		Non-redundant gene list:
Tb927.1.1730	Polyadenylation mediator complex protein PAMC1, putative	2.079	0.73	4.32277	3304	4995	5161	56.8697	0.686744	1.71183	2.63095	4345.56	1556.33		The 'proteome set' = 2315 genes (at top of list)
Tb927.1.1930	phosphatidylinositol 3-kinase, putative	8.709	0.729	1.03306	6910	11896	12410	31.0706	0.640467	0.935257	1.40452	754.408	276.514		The transcriptome set = 4910 additional genes (7225 in total)
Tb927.1.1960	chaperone protein DnaJ, putative	1.974	0.712	4.55235	3201	4915	5026	58.4073	0.66985	1.75812	2.0922	2293.21	1060.7
Tb927.1.2100	Calpain-like protein 1.1	3.438	0.748	11.6245	14181	22423	24458	154.909	0.692374	4.66291	2.83974	5377.38	4860.21
Tb927.1.2120	Calpain-like protein CALP1.3	2.196	0.728	6.36653	2734	4352	4967	47.7013	0.683543	1.43586	2.51919	3849.94	1207.84
Tb927.1.2210	nucleosome assembly protein (NAP), putative	0.954	0.709	7.31452	3113	5178	5137	122.414	0.679698	3.68478	2.39118	3328.65	2823.42
Tb927.1.2260	small myristoylated protein 1-2	0.387	0.731	10.2564	1427	2821	2400	147.105	0.712337	4.42799	3.72277	11444.8	7492.97
Tb927.1.2330	beta tubulin	1.326	0.874	24.8307	87226	135414	151493	2459.04	0.839454	74.0194	20.8751	1.40426e+06	2.74075e+06
Tb927.1.2430	histone H3, putative	0.399	0.843	19.9005	15304	23290	25399	1395.35	0.82405	42.0013	16.9392	784002	1.07002e+06
Tb927.1.2570	coatomer beta subunit	2.946	0.72	13.2248	7843	13392	14123	104.002	0.668508	3.13055	2.05447	2179.68	1828.19
Tb927.1.2670	paralyzed flagella 16	1.539	0.724	16.2127	4624	7449	7936	113.187	0.686783	3.40704	2.63235	4352.02	3100.5
Tb927.1.2750	hypothetical protein, conserved	0.504	0.72	21.6963	1813	2823	3181	134.584	0.698702	4.05112	3.09422	6832.02	4923.56
Tb927.1.3000	amidohydrolase, putative	1.206	0.718	7.44417	1798	2924	3110	56.4552	0.685055	1.69936	2.57136	4076.5	1482.92
Tb927.1.3010	mRNA processing protein, putative	1.116	0.729	4.46828	913	1569	1501	31.0011	0.697308	0.933163	3.03625	6480.92	1096.38
Tb927.1.3030	KREL2	1.248	0.725	3.19744	2678	4275	4617	80.6953	0.691486	2.42901	2.80572	5199.58	2477.76
Tb927.1.3070	hypothetical protein, conserved	1.239	0.754	6.44122	3171	4793	5041	92.0262	0.720607	2.77008	4.16464	15649.4	5729.53
Tb927.1.3110	soluble N-ethylmaleimide sensitive factor (NSF) attachment protein, putative	0.843	0.742	14.1844	2169	3573	3672	97.0111	0.714455	2.92013	3.83128	12399.8	5202.12
Tb927.1.3170	CHORD, putative	0.915	0.753	5.44662	1962	3045	3228	78.5813	0.724303	2.36537	4.37876	17998.6	5351.73
Tb927.1.3200	Suppressor of G2 allele of SKP1, putative	0.663	0.792	15.015	2403	3728	4193	135.378	0.767573	4.075	7.87447	92524.4	26355.4
Tb927.1.3260	hypothetical protein, conserved	5.658	0.728	1.76647	6059	10971	10875	42.6276	0.65664	1.28313	1.74901	1391.15	561.77
Tb927.1.3270	hypothetical protein, conserved	2.733	0.727	2.92398	2852	4909	4747	39.7897	0.677405	1.19771	2.31794	3051.97	868.036
Tb927.1.3300	Myotubularin-related protein, putative	2.616	0.72	4.5819	3356	5811	5487	48.7239	0.671478	1.46664	2.1389	2438.87	920.508
Tb927.1.3310	hypothetical protein, conserved	0.756	0.673	13.1752	2361	3716	3986	115.895	0.646916	3.48856	1.53289	962.878	1206.18
Tb927.1.3450	hypothetical protein, conserved	2.373	0.706	2.10438	2033	3258	3485	32.2298	0.659786	0.970148	1.82526	1567	458.448
Tb927.1.3830	glucose-6-phosphate isomerase, glycosomal	1.821	0.736	16.4474	31655	48164	53918	641.815	0.695517	19.3193	2.96338	6056.27	21732.7
Tb927.1.3950	alanine aminotransferase	1.512	0.814	18.4818	8969	14346	15683	224.408	0.777111	6.75492	8.96202	132738	55070.1
Tb927.1.4050	ser/thr protein phosphatase, putative	2.775	0.747	6.47948	3497	6140	6215	49.4533	0.697025	1.48859	3.02463	6411.96	1737.01
Tb927.1.4100	cytochrome oxidase subunit IV	1.059	0.78	16.9492	1969	3217	3309	69.7937	0.749128	2.10086	6.13161	46042.9	8683.43
Tb927.1.4280	hypothetical protein, conserved	2.094	0.695	4.29185	1079	2082	2062	21.4021	0.651588	0.644223	1.63318	1149.08	249.495
Tb927.1.4310	Flagellum attachment zone protein 2	4.914	0.745	15.0498	9368	15121	17986	74.908	0.678497	2.2548	2.35255	3180.8	1678.09
Tb927.1.4340	hypothetical protein, conserved	2.148	0.693	3.2543	2406	4130	4122	43.0721	0.649032	1.29651	1.57753	1043.15	471.905
Tb927.1.4420	ABC transporter, putative	2.835	0.723	7.75194	1457	2787	2662	20.9624	0.672488	0.63099	2.1684	2533.86	405.856
Tb927.1.4490	acetyltransferase, putative	0.516	0.73	7.70713	2263	3605	3717	161.556	0.70845	4.86299	3.53159	9879.42	7488.1
Tb927.1.4680	Kinetochore interacting protein 6	0.993	0.691	4.01606	933	1693	1724	37.7123	0.661105	1.13518	1.8582	1647.18	553.886
Tb927.1.4690	Protein arginine N-methyltransferase 1 catalytic subunit	1.035	0.729	8.67052	2697	4219	4328	94.9697	0.69848	2.85868	3.08489	6774.72	3455.6
Tb927.1.4830	phospholipase A1	0.9	0.667	9.96678	1810	3207	3533	81.6456	0.63854	2.45761	1.36827	701.348	693.395
Tb927.1.5000	hypothetical protein, conserved	0.813	0.691	9.80392	1535	2537	2580	71.0813	0.66395	2.13962	1.9313	1834.38	1118.62
Tb927.1.670	conserved protein, unknown function	1.842	0.747	2.16802	1375	2805	2616	31.5621	0.706284	0.95005	3.42934	9101.99	1387.97
Tb927.1.700	phosphoglycerate kinase	1.32	0.766	9.07029	19166	30255	32684	542.117	0.731533	16.3183	4.82985	23661	44002.8
Tb927.1.710	phosphoglycerate kinase	1.26	0.753	6.33413	4335	7222	7593	131.878	0.719325	3.96967	4.09287	14908.5	7959.17
Tb927.1.720	phosphoglycerate kinase	1.527	0.713	7.84314	3042	5044	5187	75.5755	0.675928	2.2749	2.27199	2886.18	1590.69
Tb927.1.860	transmembrane protein, putative	0.804	0.735	9.91326	4736	7765	8150	222.968	0.7081	6.71156	3.51487	9749.5	10247.2
Tb927.1.880	Midasin, putative	13.776	0.713	0.725742	4754	7931	9141	13.7115	0.601652	0.41273	0.829646	173.693	47.5622
Tb927.1.990	Enkuring domain-containig protein	1.122	0.693	8.88889	2362	3877	3747	77.6508	0.661223	2.33736	1.86116	1654.52	1143.72
Tb927.10.10030	hypothetical protein, conserved	0.3	0.681	26.4026	706	1162	1166	87.4072	0.664568	2.63104	1.94756	1877.8	1396.34
Tb927.10.10130	mitochondrial RNA binding complex 1 subunit	1.635	0.725	2.442	2121	3705	3849	51.1521	0.68664	1.53973	2.62725	4328.5	1396.33
Tb927.10.10140	paraflagellar rod component, putative	0.993	0.743	20.0803	10050	15920	16305	371.649	0.713105	11.187	3.76175	11782.2	19286.6
Tb927.10.10280	microtubule-associated protein, putative	7.113	0.765	1.12423	9477	15020	18598	52.5029	0.684989	1.58039	2.56909	4066.46	1376.92
Tb927.10.10320	dynein light chain Tctex-type, putative	0.327	0.752	12.1212	737	1142	1159	80.8393	0.734845	2.43334	5.05178	26820.1	7110.94
Tb927.10.10340	structural maintenance of chromosome 2, putative	3.525	0.734	4.53515	3859	6792	6904	43.1042	0.677675	1.29748	2.32646	3083.36	946.535
Tb927.10.10390	trypanothione reductase	1.476	0.766	14.8749	7688	12139	12969	193.809	0.729553	5.83383	4.70189	21953.3	14993
Tb927.10.10420	monothiol glutaredoxin, putative	0.393	0.785	10.101	515	1031	991	54.924	0.766193	1.65327	7.72851	87818.9	10340.5
Tb927.10.10460	histone H2B, putative	0.336	0.859	26.5487	1608	2572	2729	177.947	0.84161	5.35638	21.4946	1.52361e+06	208989
Tb927.10.1060	T-complex protein 1, delta subunit, putative	1.608	0.767	23.5878	11158	17636	19447	261.267	0.728958	7.86438	4.6641	21464.7	19921.8
Tb927.10.10610	protein tyrosine phosphatase, putative	0.687	0.766	8.69565	2588	4321	4434	143.124	0.741134	4.30817	5.50163	34026.2	14666.3
Tb927.10.10620	hypothetical protein, conserved	0.888	0.721	6.73401	1563	2692	2313	64.5131	0.69273	1.94191	2.85347	5450.18	2041.62
Tb927.10.1070	cdc2-related kinase 1	0.903	0.739	12.1413	867	1600	1747	39.9616	0.710492	1.20288	3.63077	10673	1946.34
Tb927.10.10700	splicing factor Prp31	1.065	0.722	3.74532	1574	2630	2706	56.318	0.69104	1.69523	2.78882	5112.68	1710.65
Tb927.10.1080	40S ribosomal protein S23, putative	0.429	0.831	16.2037	14954	23901	25077	1292.98	0.811351	38.9201	14.259	484880	728494
Tb927.10.10830	RGG-containing protein 2	0.96	0.718	8.30737	1103	1746	1831	42.5047	0.688606	1.27943	2.69825	4662.81	1217
Tb927.10.10850	Protein argonaute-1	2.709	0.724	16.5929	3261	5448	6297	47.8827	0.674623	1.44132	2.23211	2747.07	976.381
Tb927.10.10880	ATP-binding cassette sub-family F member 1, putative	2.052	0.738	8.75912	5045	8021	8309	90.9872	0.695026	2.7388	2.94371	5944.77	3044.44
Tb927.10.1100	60S ribosomal protein L9, putative	0.567	0.799	29.8246	23436	36862	37908	1509.43	0.77641	45.4354	8.87724	129265	364169
Tb927.10.11020	DNA mismatch repair protein MSH2, putative	2.853	0.728	3.15126	1776	2942	2994	23.5387	0.677328	0.708537	2.31552	3043.08	512.549
Tb927.10.11080	paraflagellar rod protein	3.492	0.784	2.28898	2328	4096	4190	26.3003	0.727939	0.791666	4.60011	20653.2	1956.45
Tb927.10.11140	hypothetical protein, conserved	4.623	0.713	0.856348	5302	9503	10157	46.5439	0.648497	1.40102	1.56611	1022.24	503.359
Tb927.10.11180	Ubiquitin-like modifier-activating enzyme ATG7, putative	2.262	0.726	2.20751	1719	2973	2857	29.0023	0.68088	0.872997	2.42982	3480.9	688.395
Tb927.10.11210	hypothetical protein, conserved	1.413	0.715	2.82486	1418	2342	2367	37.7436	0.679339	1.13612	2.37956	3283.74	862.984
Tb927.10.11250	Coiled-coil domain-containing protein 40 homolog	2.616	0.692	7.25468	4506	7061	7410	63.4404	0.643478	1.90962	1.46306	845.439	607.399
Tb927.10.1130	dynein arm light chain, axonemal, putative	0.822	0.74	4.84848	1860	3022	3002	83.5767	0.712801	2.51574	3.74625	11647.3	4305.26
Tb927.10.11300	paraflagellar rod component, putative	0.378	0.747	36.7454	8138	13164	13638	800.718	0.728555	24.1024	4.63872	21140.3	60461.9
Tb927.10.11310	intraflagellar transport protein 57/55	1.239	0.698	12.0773	4246	6920	7143	128.635	0.664607	3.87203	1.94858	1880.54	2056.88
Tb927.10.11380	hypothetical protein, conserved	1.17	0.75	5.9676	965	1569	1726	31.5961	0.71755	0.951073	3.99551	13940.1	1826.48
Tb927.10.11390	60S ribosomal protein L6, putative	0.576	0.871	32.8152	23707	37458	38859	1512.06	0.848232	45.5146	23.5142	1.95739e+06	2.08547e+06
Tb927.10.11520	mitochondrial import inner membrane translocase subunit tim13	0.351	0.74	16.9492	1100	1757	1980	118.95	0.722226	3.58051	4.25713	16638.4	7702.73
Tb927.10.11530	hypothetical protein, conserved	0.303	0.746	16.3399	619	974	974	73.5961	0.729486	2.21531	4.69765	21898.2	5684.21
Tb927.10.11590	nicotinate phosphoribosyltransferase, putative	1.284	0.721	3.885	3385	5409	5800	98.965	0.687006	2.97894	2.64032	4388.87	2725.62
Tb927.10.1170	intraflagellar transport protein 172	5.241	0.75	15.4462	12650	20695	23194	93.6511	0.68132	2.81899	2.44437	3539.36	2246.77
Tb927.10.11700	guanylate kinase, putative	0.534	0.728	9.66184	1700	3259	3243	131.3	0.706077	3.95227	3.41975	9031.15	5745.17
Tb927.10.11760	pumilio/PUF RNA binding protein 6	2.529	0.747	11.4534	2702	4477	5551	43.3872	0.699292	1.306	3.11906	6986.1	1610.13
Tb927.10.11780	hypothetical protein, conserved	3.489	0.707	2.86369	6384	11076	11197	71.2138	0.650963	2.1436	1.6194	1122.25	817.683
Tb927.10.11800	Axonemal inner arm dynein light chain, putative	1.119	0.692	5.34759	1208	2133	1898	40.6899	0.660265	1.22481	1.83715	1595.65	585.555
Tb927.10.11870	mitochondrial RNA binding protein	0.93	0.671	4.28725	1824	2995	3056	73.6361	0.642069	2.21652	1.43537	801.553	681.314
Tb927.10.11930	beta-D-hydroxybutyrate dehydrogenase	0.78	0.704	12.7714	1289	2274	2418	66.0097	0.677505	1.98696	2.32109	3063.55	1443.54
Tb927.10.11970	glutamine aminotransferase (GlnAT)	1.287	0.758	16.2791	1867	3219	3216	55.9154	0.723966	1.68311	4.35878	17770.5	3777.05
Tb927.10.11990	RNA-binding protein	0.645	0.737	7.71605	598	940	949	33.658	0.712906	1.01314	3.75163	11693.9	1738.27
Tb927.10.12030	hypothetical protein, conserved	0.75	0.728	7.96813	1080	1876	1968	56.6362	0.702019	1.70481	3.23661	7745.65	2245.69
Tb927.10.12040	mitogen-activated protein kinase 11, putative	1.239	0.715	13.6876	807	1390	1460	25.5227	0.681607	0.768257	2.45389	3577.95	616.585
Tb927.10.12090	RNA-binding protein, putative	0.348	0.703	14.245	1684	2726	2744	178.205	0.685303	5.36414	2.58002	4114.93	4709.18
Tb927.10.1210	katanin, putative	2.04	0.686	6.85267	2031	3364	3425	37.633	0.643151	1.13279	1.4566	835.061	357.467
Tb927.10.12130	Ubiquitin family, putative	2.349	0.718	2.97619	1081	1840	1793	17.4583	0.672021	0.525513	2.15471	2489.48	334.203
Tb927.10.12180	hypothetical protein, conserved	2.106	0.696	5.6899	1630	2710	2753	29.3088	0.652464	0.882222	1.65269	1187.8	349.008
Tb927.10.12210	ribulose-5-phosphate 3-epimerase, putative	0.738	0.715	5.39811	1098	1734	1653	53.2068	0.689228	1.60158	2.7211	4773.82	1546.59
Tb927.10.12240	3-ketoacyl-CoA reductase, putative	0.981	0.78	12.1951	1757	2890	2763	65.8966	0.750286	1.98355	6.22874	48106.4	8432.44
Tb927.10.12260	cytosolic nonspecific dipeptidase, putative	1.425	0.762	13.3053	2722	4440	4742	72.6095	0.726188	2.18562	4.49213	19329	5176.51
Tb927.10.1230	Enriched in surface-labeled proteome protein 23	1.026	0.769	7.77454	3565	5582	5898	127.978	0.738613	3.85226	5.31664	30929.5	12335.6
Tb927.10.12330	zinc finger protein family member, putative	0.606	0.728	11.4943	2260	3453	3709	135.663	0.704646	4.08358	3.35401	8555.1	5733.36
Tb927.10.12360	hypothetical protein, conserved	0.51	0.745	7.79727	1255	2096	2274	95.1954	0.723576	2.86548	4.33576	17509.8	6369.73
Tb927.10.12370	gamma-glutamylcysteine synthetase	2.037	0.725	4.90196	2621	4568	4629	50.242	0.682183	1.51233	2.47314	3656.79	1230.85
Tb927.10.12410	hypothetical protein, conserved	0.684	0.727	16.0116	2621	4367	4378	144.238	0.702189	4.34171	3.24406	7795.48	5742.77
Tb927.10.12430	Noc2p family, putative	1.947	0.744	3.58974	2278	3850	3964	44.9933	0.70214	1.35434	3.24189	7780.98	1789.25
Tb927.10.1250	Aminoacyl-tRNA editing domain containing protein, putative	0.783	0.749	12.7226	1826	3038	3252	89.7422	0.722454	2.70133	4.27028	16782.1	5843.52
Tb927.10.12500	P-type H+-ATPase, putative	2.736	0.77	3.65097	3769	6100	7207	54.0656	0.720377	1.62743	4.1517	15514.1	3347.42
Tb927.10.12510	P-type H+-ATPase, putative	2.76	0.769	3.98118	4743	7705	9123	67.6708	0.71916	2.03696	4.08373	14815.8	4067.78
Tb927.10.12590	hypothetical protein, conserved	2.799	0.707	8.9222	4762	7259	8070	62.7754	0.656809	1.8896	1.75303	1400.07	830.691
Tb927.10.12660	pumilio/PUF RNA binding protein 2	2.541	0.723	3.14465	388	656	581	5.59349	0.675178	0.16837	2.249	2805.43	115.606
Tb927.10.12700	pyruvate dehydrogenase E1 alpha subunit, putative	1.134	0.756	29.9033	6198	9484	9980	198.089	0.724053	5.96268	4.36393	17829	13409.1
Tb927.10.12710	heat shock protein 110, putative	2.433	0.76	26.2726	26560	42671	46479	413.982	0.713206	12.4613	3.76689	11827.1	21536
Tb927.10.12720	hypothetical protein, conserved	2.706	0.683	2.58398	3526	5948	5922	49.5002	0.63365	1.49	1.28048	582.896	373.346
Tb927.10.12820	hypothetical protein, conserved	3.039	0.743	10.5194	14198	22799	24046	175.188	0.690702	5.27332	2.77605	5047.6	5277.76
Tb927.10.12840	mitochondrial carrier protein	0.912	0.753	17.4863	2901	4402	4899	116.803	0.72435	3.5159	4.38156	18030.7	7963.92
Tb927.10.12850	ttaggg binding factor	1.146	0.719	3.48129	11503	18509	19594	376.76	0.686885	11.3408	2.63598	4368.77	10345.9
Tb927.10.12860	pre-RNA processing PIH1/Nop17, putative	2.082	0.718	3.83693	1955	3244	3252	35.3526	0.674713	1.06415	2.23483	2756.41	722.45
Tb927.10.12890	bifunctional aminoacyl-tRNA synthetase, putative	2.424	0.742	19.5531	13370	21907	23068	209.444	0.695292	6.30446	2.95438	6005.09	7053.54
Tb927.10.12940	predicted zinc finger protein	0.972	0.718	8.20513	1932	3094	3182	73.6107	0.688423	2.21575	2.69156	4630.61	2098.28
Tb927.10.12960	Ras-related protein Rab5A	0.69	0.722	12.987	4062	6493	6738	218.139	0.69708	6.5662	3.02689	6425.34	7672.21
Tb927.10.12990	predicted ankyrin repeat family protein	0.888	0.735	4.48934	1423	2420	2236	59.5876	0.70673	1.79365	3.45015	9256.88	2648.93
Tb927.10.1310	Domain of unknown function (DUF4042), putative	2.832	0.707	1.41093	2058	3626	3753	28.8073	0.656514	0.867127	1.74603	1384.53	378.479
Tb927.10.13110	Outer arm dynein light chain 7	0.354	0.706	14.0056	2273	3742	3773	239.268	0.688151	7.20221	2.68163	4583.14	6775.42
Tb927.10.13180	Nrap protein, putative	3.708	0.715	2.42522	3350	5890	5785	35.1344	0.657231	1.05758	1.76309	1422.62	469.713
Tb927.10.13250	hypothetical protein, conserved	5.73	0.692	0.697715	4807	8492	8500	32.9501	0.620188	0.991831	1.06678	350.243	179.242
Tb927.10.13280	hypothetical protein, conserved	7.818	0.72	4.85871	7660	13054	14436	38.9003	0.636118	1.17094	1.32407	639.943	311.51
Tb927.10.13320	DNA-directed RNA polymerase II/III subunit, putative	0.657	0.706	7.57576	1453	2468	2348	82.8522	0.681683	2.49393	2.45643	3588.31	2005.29
Tb927.10.13360	Elongation factor Tu, mitochondrial	1.41	0.776	20.5237	3767	6886	6956	107.569	0.740377	3.23793	5.44541	33064.9	10822.1
Tb927.10.13430	citrate synthase, putative	1.452	0.739	13.7457	1420	2618	2533	39.0266	0.70285	1.17474	3.2733	7993.08	1578.98
Tb927.10.13450	hypothetical protein, conserved	1.8	0.715	3.88242	1789	3439	3315	40.7799	0.674751	1.22752	2.23599	2760.4	834.133
Tb927.10.13510	zinc metallopeptidase, putative	1.707	0.727	7.01754	3141	5181	5173	68.8902	0.687804	2.07366	2.66907	4523.48	1934.45
Tb927.10.13560	mevalonate-diphosphate decarboxylase	1.146	0.774	9.57354	786	1272	1428	26.3808	0.741885	0.794089	5.5579	35005.9	2753
Tb927.10.13620	nadh-ubiquinone oxidoreductase 39 kda subunit	1.455	0.721	2.74348	1712	2682	2753	42.9681	0.684813	1.29338	2.56295	4039.41	1122.05
Tb927.10.13630	glucosidase, putative	2.421	0.739	11.9637	11331	17792	19471	175.101	0.692321	5.2707	2.8377	5366.58	5486.64
Tb927.10.13670	serine/threonine protein phosphatase 5	1.416	0.735	5.63777	4643	7827	8323	127.222	0.699301	3.8295	3.11947	6988.68	4722.41
Tb927.10.13710	Activator of Hsp90 ATPase, N-terminal/Activator of Hsp90 ATPase homolog 1-like protein, putative	0.993	0.758	12.0482	5378	8312	9321	201.879	0.728105	6.07677	4.61047	20783.2	15078.1
Tb927.10.13720	RNA-binding protein 29, putative	1.131	0.745	12.3457	6664	10719	11487	222.039	0.713095	6.68359	3.76126	11777.9	11519.9
Tb927.10.13740	synaptotagmin, putative	1.782	0.735	2.2409	3090	4945	5031	64.0446	0.694953	1.92781	2.9408	5928.36	2139.14
Tb927.10.13780	glycogen synthase kinase 3	1.056	0.736	19.83	1679	2897	3006	62.0858	0.705171	1.86884	3.37799	8726.82	2657.53
Tb927.10.13790	hypothetical protein, conserved	2.04	0.746	16.1527	8124	12940	14759	152.595	0.703151	4.59326	3.28669	8084.67	6219.15
Tb927.10.13800	hypothetical protein, conserved	0.969	0.738	10.0309	2811	4682	4883	110.792	0.708469	3.33494	3.53248	9886.38	5137.5
Tb927.10.13850	ATP12 chaperone protein, putative	1.14	0.724	4.37445	1886	2972	3083	60.8274	0.691969	1.83096	2.82416	5295.47	1889.74
Tb927.10.13860	GPI-anchor transamidase subunit 8 (GPI8)	0.957	0.724	10.4167	3043	4991	5226	120.36	0.694652	3.62296	2.92884	5861.35	3990.92
Tb927.10.1390	hypoxanthine-guanine phosphoribosyltransferase, putative	0.702	0.737	22.695	3766	5797	6476	198.92	0.711864	5.9877	3.69898	11241.8	10016.6
Tb927.10.13950	tubulin-specific chaperone, putative	0.696	0.729	15.7368	1901	3005	2963	98.7836	0.703972	2.97348	3.32348	8339.63	4107.01
Tb927.10.13960	paralyzed flagella protein 20	1.767	0.714	6.21469	3031	4647	4838	62.0829	0.674121	1.86876	2.21699	2695.44	1250.62
Tb927.10.13970	uracil-DNA glycosylase, putative	0.891	0.726	4.47427	1689	2749	2752	70.2967	0.697682	2.116	3.05171	6573.39	2508.81
Tb927.10.13980	btb/poz domain containing protein, putative	0.618	0.697	6.37959	1008	1515	1737	60.0509	0.673416	1.80759	2.19588	2624.46	1189.16
Tb927.10.1400	hypoxanthine-guanine phosphoribosyltransferase	0.63	0.739	18.9573	2399	3924	4172	144.404	0.715188	4.34671	3.86955	12748.4	7882.49
Tb927.10.14000	aconitase	2.691	0.729	16.7038	2606	4711	4635	38.3858	0.679787	1.15545	2.39407	3339.89	887.266
Tb927.10.14010	tubulin cofactor C domain-containing protein RP2	1.389	0.752	10.0575	3882	6151	6675	104.784	0.716643	3.15409	3.94667	13469.9	5925.38
Tb927.10.14030	hypothetical protein, conserved	1.347	0.661	9.62963	9523	14952	16092	262.698	0.626182	7.90746	1.15713	439.408	1652.83
Tb927.10.14040	vacuolar ATP synthase subunit c, putative	1.14	0.673	12.2485	4159	6996	6960	138.085	0.640969	4.15649	1.41411	768.868	1243.95
Tb927.10.14090	transporter, putative	1.578	0.715	3.79507	3797	6301	6775	92.7592	0.677314	2.79214	2.31511	3041.58	2019.17
Tb927.10.14130	SRP19 protein, putative	0.456	0.713	10.8932	1207	1973	2166	101.284	0.692742	3.04874	2.85392	5452.62	3206.2
Tb927.10.14140	pyruvate kinase 1	1.497	0.825	27.3333	52138	81511	88141	1292.89	0.788294	38.9172	10.4299	202659	416231
Tb927.10.14150	nuclear segregation protein, putative	1.437	0.764	16.6667	11038	17344	18542	284.947	0.728038	8.57719	4.60624	20730.1	21247.4
Tb927.10.14160	Aquaglyceroporin 3	0.912	0.733	5.46448	8495	12583	14095	337.455	0.70435	10.1577	3.34058	8459.88	14159.5
Tb927.10.14180	protein transport protein SEC13	1.122	0.728	14.2222	3429	5372	5798	113.456	0.696223	3.41513	2.9919	6220.22	3908.17
Tb927.10.1420	metallo-peptidase, Clan MG, Family M24	1.389	0.75	9.33908	4713	7417	7963	126.174	0.714643	3.79796	3.84105	12488.2	6796.86
Tb927.10.14200	syntaxin 5	0.981	0.709	5.0813	1647	2916	2921	65.891	0.679286	1.98338	2.37786	3277.19	1504.63
Tb927.10.14240	N-myristoyltransferase	1.338	0.729	6.71141	2227	3681	4076	64.6407	0.694298	1.94575	2.91482	5783.44	2125.04
Tb927.10.1430	hypothetical protein, conserved	0.735	0.754	16.2602	1257	1980	2171	63.9777	0.72828	1.92579	4.62144	20921.4	4798.77
Tb927.10.14320	Flagellum attachment zone protein 9	3.399	0.729	8.23045	3743	6642	6596	43.2508	0.673691	1.30189	2.20408	2651.88	862.204
Tb927.10.14330	Utp14 protein, putative	3.12	0.718	2.24143	3566	6075	6154	43.9682	0.665009	1.32348	1.95925	1909.4	709.96
Tb927.10.14340	hypothetical protein, conserved	3.519	0.698	2.55537	3832	6276	6479	41.0738	0.641723	1.23636	1.42865	791.127	376.854
Tb927.10.14380	Hsp70 protein, putative	2.583	0.705	2.70688	3066	5333	5357	46.1626	0.656785	1.38954	1.75245	1398.78	610.494
Tb927.10.14390	Histone chaperone Rttp106-like, putative	1.665	0.736	9.59233	3049	5189	5507	71.4807	0.69729	2.15164	3.0355	6476.46	2526.87
Tb927.10.14490	hypothetical protein, conserved	1.26	0.741	19.0024	2707	4277	4564	79.9135	0.707325	2.40548	3.47811	9467.72	3604.21
Tb927.10.1450	plectin, putative	8.616	0.714	1.16023	6493	10262	11880	28.9136	0.625941	0.870329	1.15336	435.42	180.857
Tb927.10.14500	hypothetical protein, conserved	1.011	0.737	18.7377	6367	10059	10405	231.639	0.706835	6.97258	3.45509	9293.94	10323.8
Tb927.10.14510	root hair defective 3 GTP-binding protein (RHD3), putative	2.562	0.717	7.79727	4491	7797	7887	68.248	0.668981	2.05433	2.06769	2219.04	1213.55
Tb927.10.14520	Basal body protein	1.398	0.698	4.99643	1848	3020	3053	49.3725	0.662529	1.48616	1.89443	1738.35	750.638
Tb927.10.14530	19S proteasome non-atpase subunit 8	1.143	0.72	7.8534	4498	7068	7571	146.007	0.687927	4.39497	2.6735	4544.46	4112.11
Tb927.10.14550	ATP-dependent RNA helicase HEL67	1.98	0.754	15.0781	380	571	749	7.44995	0.711786	0.224251	3.69506	11208.7	374.432
Tb927.10.14570	kinesin motor domain containing protein, putative	2.154	0.703	6.4905	2223	4129	3878	41.0094	0.65897	1.23442	1.80517	1519.37	571.894
Tb927.10.14600	40S ribosomal protein S2, putative	0.798	0.839	29.9625	20339	31923	33282	935.195	0.812201	28.1503	14.4244	500731	537895
Tb927.10.14680	ribosome biogenesis protein, putative	0.921	0.727	8.65801	1452	2575	2589	62.0097	0.698209	1.86655	3.07361	6705.83	2241.56
Tb927.10.14700	hypothetical protein, conserved	1.026	0.716	11.6618	8019	12807	13906	294.405	0.685613	8.86188	2.59089	4163.47	7838.62
Tb927.10.14730	chaperone protein DnaJ, putative	1.329	0.678	4.5045	1992	3320	3416	57.0515	0.643415	1.71731	1.46182	843.441	545.4
Tb927.10.14740	hypothetical protein, conserved	1.155	0.709	11.2263	2141	3572	3841	71.6686	0.676759	2.1573	2.29772	2978.29	1539.17
Tb927.10.14750	fibrillarin, putative	0.912	0.709	18.5792	2084	3430	3594	86.7037	0.68035	2.60987	2.41242	3411.82	2031.7
Tb927.10.14760	clathrin light chain, putative	0.567	0.733	8.77193	10510	16475	17443	682.091	0.71041	20.5316	3.62673	10640	33155.5
Tb927.10.14770	Associated kinase of Tb14-3-3	1.92	0.715	9.36037	3692	6166	6416	73.6266	0.673431	2.21623	2.19632	2625.92	1458.51
Tb927.10.14780	mitogen-activated protein kinase kinase kinase, putative	0.852	0.739	21.0526	3498	5889	6106	157.544	0.711309	4.74222	3.67121	11008	7826.86
Tb927.10.14790	metallo-peptidase, Clan MG, Family M24	1.146	0.777	21.7581	11317	18506	18784	369.322	0.744885	11.117	5.78871	39213.7	41452.4
Tb927.10.14800	mitogen-activated protein kinase 9, putative	1.161	0.703	5.15464	537	867	813	16.7163	0.670675	0.503177	2.11574	2365.91	309.716
Tb927.10.14810	multiprotein-bridging factor 1, putative	0.48	0.761	14.4928	1868	2963	2970	141.554	0.740215	4.26093	5.43348	32863.4	14185.5
Tb927.10.14820	Mitochondrial ADP/ATP carrier protein 5c	0.921	0.762	21.645	4020	6930	7117	169.659	0.733209	5.10691	4.94095	25210.8	14343
Tb927.10.14860	NADH-ubiquinone oxidoreductase B14 subunit	2.139	0.677	1.86741	3014	4791	4877	51.8381	0.633124	1.56038	1.27138	571.405	386.017
Tb927.10.14870	hypothetical protein, conserved	2.043	0.697	2.93255	1554	2559	2625	28.7144	0.65412	0.864332	1.69024	1264.61	355.957
Tb927.10.14890	C-terminal motor kinesin, putative	2.46	0.779	25.5786	16563	26160	28786	253.361	0.731947	7.62642	4.85706	24034.8	20772.7
Tb927.10.1490	Temperature dependent protein affecting M2 dsRNA replication, putative	3.66	0.732	9.00901	7172	11733	13455	76.6457	0.674607	2.30711	2.23162	2745.38	1562.27
Tb927.10.14930	Zinc finger CCCH domain-containing protein 39	0.855	0.708	9.32401	252	428	467	11.5827	0.68026	0.34865	2.40947	3400.19	270.818
Tb927.10.14950	Zinc finger CCCH domain-containing protein 40	1.296	0.726	7.69823	1854	3192	3154	54.8834	0.691847	1.65204	2.81952	5271.21	1700.06
Tb927.10.14980	intraflagellar transport protein 52	1.965	0.735	12.1951	4197	7003	7388	82.124	0.692946	2.47201	2.86186	5495.03	2612.64
Tb927.10.14990	intraflagellar transport protein 80	2.346	0.722	13.6228	5382	8525	9324	86.3043	0.67605	2.59784	2.27574	2899.49	1821.87
Tb927.10.1500	methionyl-tRNA synthetase, putative	2.319	0.769	18.5185	6481	10022	11020	103.675	0.723315	3.12071	4.32047	17338.1	6893.37
Tb927.10.15000	hypothetical protein, conserved	1.266	0.74	6.30418	2864	4905	5076	87.8554	0.706245	2.64454	3.42753	9088.6	3859.86
Tb927.10.1510	CCR4-NOT transcription complex subunit 1	6.978	0.759	15.1841	11004	17781	19212	59.9101	0.679752	1.80335	2.39293	3335.48	1383.62
Tb927.10.15120	40S ribosomal protein S13, putative	0.453	0.762	24.1228	11015	17568	17540	886.139	0.741808	26.6737	5.55216	34905.1	92303.3
Tb927.10.15130	Vesicle-trafficking protein SEC22, putative	0.765	0.728	5.20833	1524	2640	2438	74.933	0.701761	2.25556	3.22528	7670.25	2952.59
Tb927.10.15170	hypothetical protein, conserved	2.085	0.711	2.39464	2849	4881	4766	52.0895	0.667681	1.56795	2.03156	2112.54	897.457
Tb927.10.15180	nucleosome assembly protein, putative	1.098	0.75	13.624	6781	10910	11865	233.946	0.718564	7.04199	4.05085	14485.5	13860.8
Tb927.10.1520	ras-related protein Rab21, putative	0.807	0.719	6.17284	1341	2183	2128	61.0698	0.69205	1.83826	2.82728	5311.78	1901.01
Tb927.10.15250	paraflagellar rod component, putative	1.455	0.735	17.8326	3530	5638	6070	91.1987	0.698813	2.74517	3.09888	6860.75	3345.36
Tb927.10.15270	metallo- peptidase, Clan MG, Family M24	1.185	0.739	10.101	1166	1956	2145	38.4525	0.706343	1.15746	3.43208	9122.26	1693.39
Tb927.10.15280	Domain of Unknown Function (DUF1042), putative	3.591	0.713	1.66945	2129	3798	3838	23.5105	0.65615	0.707689	1.73743	1365.59	306.17
Tb927.10.15290	tubulin binding cofactor c, putative	4.935	0.726	0.794123	2059	3474	3813	16.4049	0.659355	0.493805	1.81462	1541.66	230.922
Tb927.10.15330	CYTH domain containing protein, putative	1.815	0.694	9.35094	1523	2473	2407	30.8355	0.653583	0.928178	1.67798	1239.2	377.304
Tb927.10.15350	histone H3 variant V	0.417	0.68	16.6667	918	1564	1617	84.7581	0.660627	2.5513	1.8462	1617.67	1230.5
Tb927.10.15370	DNA-directed RNA polymerases I and III subunit RPAC1, putative	1.011	0.717	10.8481	544	844	913	19.858	0.686835	0.597746	2.63422	4360.65	544.656
Tb927.10.15410	glycosomal malate dehydrogenase	0.969	0.787	23.6626	2318	3847	3894	90.2177	0.757469	2.71564	6.86603	63128.4	13743.5
Tb927.10.15430	Ankyrin repeats (3 copies), putative	1.662	0.718	2.4024	1875	3442	3418	45.3007	0.679324	1.3636	2.37909	3281.92	1035.41
Tb927.10.15440	hypothetical protein, conserved	0.855	0.699	6.99301	1374	2116	2069	57.0396	0.67126	1.71695	2.1326	2418.87	1071.93
Tb927.10.1550	proteasome regulatory non-ATP-ase subunit 5	1.446	0.749	15.873	2913	4899	5250	78.254	0.712925	2.35552	3.75257	11702.2	4043.26
Tb927.10.15520	signal recognition particle protein, putative	2.028	0.73	9.84737	3067	5261	5363	58.5423	0.687278	1.76218	2.65007	4434.23	1623
Tb927.10.15530	ABC transport system ATP-binding protein, putative	1.806	0.768	12.1614	1758	2774	3147	36.9882	0.727684	1.11338	4.58419	20454.4	2734.48
Tb927.10.15590	macrophage infectivity potentiator, precursor, putative	0.588	0.73	6.76819	999	1483	1609	60.8566	0.706996	1.83184	3.46261	9350.44	2722.85
Tb927.10.1560	hypothetical protein, conserved	2.481	0.717	4.83092	2296	4304	4528	38.4975	0.669746	1.15881	2.08926	2284.22	697.374
Tb927.10.15640	WD domain, G-beta repeat, putative	2.112	0.734	2.36407	1984	3395	3309	35.7612	0.690402	1.07645	2.76478	4990.64	1069.54
Tb927.10.15660	hypothetical protein, conserved	2.337	0.709	2.99145	1547	2400	2488	24.1185	0.663138	0.725991	1.91015	1778.89	372.152
Tb927.10.15700	hypothetical protein, conserved	10.356	0.685	0.386138	9190	14463	16379	33.6858	0.588458	1.01398	0.693705	105.432	84.8262
Tb927.10.15710	mitochondrial carrier protein	0.969	0.71	5.14403	911	1383	1392	33.3885	0.680469	1.00503	2.4163	3427.13	784.629
Tb927.10.15720	proteasome regulatory non-ATP-ase subunit 9	1.215	0.73	13.1363	3226	5250	5868	102.364	0.696932	3.08127	3.02081	6389.4	3587.34
Tb927.10.15740	hypothetical protein, conserved	1.551	0.722	3.861	961	1851	1824	25.645	0.684638	0.771941	2.55688	4012.79	666.848
Tb927.10.15760	hypothetical protein, conserved	0.945	0.787	27.4262	6185	10109	10851	249.291	0.757837	7.50392	6.90039	64013.6	38317.2
Tb927.10.1580	Domain of unknown function (DUF543), putative	0.342	0.743	11.5942	329	485	495	33.4907	0.725456	1.0081	4.44774	18800.8	2345.57
Tb927.10.15850	Peroxisome biogenesis factor 12	1.185	0.736	10.9428	1316	2064	2155	40.7989	0.703343	1.22809	3.29523	8143.39	1670.53
Tb927.10.16100	FK506-binding protein (FKBP)-type peptidyl-prolyl isomerase, putative	1.275	0.77	20.3443	6850	10468	12037	200.684	0.736125	6.04079	5.14027	28151.5	18210.2
Tb927.10.16110	component of motile flagella 1	1.158	0.732	11.1972	762	1211	1368	25.0617	0.699717	0.754383	3.1371	7099.45	939.711
Tb927.10.16120	inosine-5'-monophosphate dehydrogenase	1.341	0.762	18.8434	8183	12650	14131	227.361	0.72726	6.84379	4.55789	20128.7	16636.3
Tb927.10.16150	ATP-dependent zinc metallopeptidase, putative	1.731	0.724	5.76701	1193	2083	2185	27.2625	0.68453	0.820628	2.55312	3996.35	707.042
Tb927.10.1630	atp-binding cassette sub-family e member 1	1.893	0.691	11.0759	3522	5787	6371	71.8678	0.649724	2.16329	1.59241	1070.84	800.739
Tb927.10.1660	hypothetical protein, conserved	0.885	0.691	5.63063	618	966	1061	26.0242	0.662778	0.783355	1.90083	1754.79	398.058
Tb927.10.1690	cytosolic Fe-S cluster assembly factor NBP35, putative	0.936	0.705	7.45474	835	1456	1403	34.1989	0.675976	1.02942	2.27345	2891.36	720.637
Tb927.10.170	pseudouridine synthase, Cbf5p	1.281	0.704	14.0187	5703	8902	9244	162.779	0.670046	4.8998	2.09776	2310.23	2970.19
Tb927.10.1720	ATP-dependent DEAD/H RNA helicase, putative	1.788	0.719	2.79174	1348	2325	2244	28.7509	0.678885	0.86543	2.36495	3227.82	650.168
Tb927.10.1730	Polyadenylation mediator complex protein PAMC3, putative	1.071	0.685	3.72439	1334	2346	2303	48.342	0.653953	1.45514	1.68642	1256.66	596.849
Tb927.10.180	ATP synthase F1 subunit gamma protein, putative	0.915	0.719	21.7865	2596	4202	4255	105.242	0.690303	3.16788	2.76108	4972.07	3140.03
Tb927.10.1830	syntaxin, putative	0.69	0.711	8.65801	1010	1791	1924	58.8601	0.68608	1.77175	2.60738	4237.79	1585.06
Tb927.10.1860	hypothetical protein, conserved	1.08	0.742	4.61681	1489	2541	2452	52.1456	0.710823	1.56964	3.6471	10807.5	2560.26
Tb927.10.1870	LSU ribosomal protein, mitochondrial, putative	0.543	0.67	8.77193	712	1273	1221	50.9228	0.647893	1.53283	1.55336	999.174	542.713
Tb927.10.1890	cysteine peptidase, Clan CA, family C2, putative	4.782	0.725	3.1348	5077	8997	9000	41.775	0.659397	1.25747	1.81564	1544.07	588.628
Tb927.10.190	40S ribosomal protein S6, putative	0.75	0.791	9.29615	16686	26904	28221	832.442	0.765019	25.0573	7.60644	84003.8	152321
Tb927.10.1970	CHAT domain containing protein, putative	4.215	0.74	2.84495	5472	9212	8963	48.8944	0.678409	1.47177	2.34972	3170.14	1092.97
Tb927.10.1990	major vault protein, putative	2.589	0.762	11.9599	4354	7433	7562	64.8676	0.713729	1.95258	3.79371	12063.6	3417.64
Tb927.10.2040	STE group serine/threonine-protein kinase, putative	2.619	0.734	4.19527	2361	4255	4078	35.3433	0.68545	1.06387	2.58519	4137.96	937.321
Tb927.10.210	GPI transamidase component GAA1	1.383	0.707	2.886	3309	5287	5997	91.6245	0.67172	2.75799	2.14593	2461.29	1741.19
Tb927.10.2190	Protein of unknown function (DUF667), putative	0.882	0.756	16.9492	6299	10206	10562	267.009	0.727826	8.03724	4.59302	20564.5	19807.7
Tb927.10.220	60S ribosomal protein L37a, putative	0.279	0.819	24.8227	8029	12578	12859	1040.46	0.803154	31.3188	12.7587	355584	480449
Tb927.10.2240	RNA binding protein	1.764	0.721	17.5439	9058	14136	15244	190.274	0.681155	5.72742	2.4389	3517.33	4546.58
Tb927.10.2270	vacuolar protein sorting-associated protein 35, putative	2.799	0.723	7.85153	4904	8014	8293	66.0281	0.672809	1.98751	2.17788	2564.89	1288.4
Tb927.10.2290	chaperone protein DnaJ, putative	1.248	0.692	7.99361	2244	3605	3881	67.8276	0.658486	2.04168	1.79334	1491.76	934.823
Tb927.10.230	proteasome subunit alpha type-5, putative	0.738	0.732	16.1943	3207	5163	5585	164.157	0.706228	4.94128	3.42674	9082.73	7209.11
Tb927.10.2320	Nucleoporin NUP41	1.143	0.725	5.2356	1331	2112	2269	43.5282	0.692927	1.31024	2.86109	5490.91	1384.11
Tb927.10.2350	pyruvate dehydrogenase complex E3 binding protein, putative	0.78	0.736	7.66284	1714	2886	2961	83.9979	0.709505	2.52842	3.58247	10281.6	3994.26
Tb927.10.2370	Lupus La protein homolog, putative	1.005	0.74	22.8175	5048	7664	8442	183.903	0.709925	5.53566	3.60295	10446.5	8834.62
Tb927.10.2380	Tetratricopeptide repeat, putative	2.748	0.701	5.45256	3943	6428	7300	55.7779	0.651269	1.67897	1.62612	1135.29	645.211
Tb927.10.240	peroxin 14, putative	1.098	0.714	14.5322	2120	3276	3700	72.1645	0.682564	2.17222	2.48596	3709.94	1784.37
Tb927.10.2440	Metacaspase-4	1.059	0.706	11.2994	3099	4662	5584	109.731	0.675128	3.30301	2.24745	2800.04	2265.12
Tb927.10.2490	glucose-6-phosphate 1-dehydrogenase	1.674	0.716	12.5224	1661	2939	3110	39.7272	0.677185	1.19583	2.31105	3026.72	862.064
Tb927.10.2530	adenylate kinase, putative	0.666	0.714	22.4215	2504	4137	4375	143.304	0.689517	4.31359	2.73181	4826.38	4194.86
Tb927.10.2550	malate dehydrogenase-related	1.071	0.7	3.72439	821	1360	1471	29.5511	0.668953	0.889518	2.06691	2216.69	525.104
Tb927.10.2560	mitochondrial malate dehydrogenase	0.954	0.722	21.9436	2305	3989	3846	92.1806	0.692698	2.77473	2.85224	5443.64	2914.95
Tb927.10.2570	lysosomal alpha-mannosidase precursor, putative	2.991	0.698	2.33801	4049	6980	6962	52.2136	0.646116	1.57168	1.51637	934.203	532.977
Tb927.10.2610	Domain of unknown function (DUF1935), putative	1.452	0.729	2.74914	1647	2688	2698	42.2315	0.69285	1.27121	2.85813	5475.08	1340.39
Tb927.10.2620	CS domain containing protein, putative	0.576	0.719	17.2712	2415	3687	4010	153.054	0.696232	4.60708	2.99226	6222.33	5273.35
Tb927.10.2640	intraflagellar transport protein 81	2.22	0.727	20.3728	6827	11062	11799	116.414	0.682301	3.50417	2.4771	3673.16	2860.15
Tb927.10.2650	hypothetical protein, conserved	3.525	0.717	2.55102	3556	5969	6154	38.6614	0.660675	1.16375	1.84739	1620.59	561.926
Tb927.10.270	60S ribosomal protein L32, putative	0.396	0.753	25.0627	9418	14619	15047	859.366	0.734121	25.8678	5.00245	26096	74277.4
Tb927.10.2730	START domain containing protein, putative	0.882	0.723	19.209	3902	6249	6775	166.782	0.694826	5.0203	2.93574	5899.95	5553.51
Tb927.10.2770	eukaryotic translation initiation factor 5, putative	1.146	0.755	24.369	1766	3010	3129	59.7309	0.722885	1.79796	4.29531	17057.9	3930.23
Tb927.10.280	cytochrome oxidase subunit VI	0.474	0.748	20.9644	2163	3584	3443	168.42	0.727346	5.06959	4.56322	20194.5	12349.3
Tb927.10.2810	hypothetical protein, conserved	1.014	0.746	15.7325	3276	5285	5634	121.728	0.715791	3.66413	3.9013	13042.4	6742.57
Tb927.10.2840	ribosomal protein S25, putative	0.339	0.804	29.2398	12503	19708	19679	1330.94	0.786533	40.0625	10.1837	189592	410545
Tb927.10.2860	POC1 centriolar protein homolog	2.34	0.716	2.13402	1307	2291	2332	21.9323	0.670109	0.660183	2.09955	2315.76	400.809
Tb927.10.2880	Voltage-dependent calcium channel subunit, putative	8.079	0.708	3.71195	12357	20643	22061	59.1907	0.622729	1.7817	1.10419	385.596	342.475
Tb927.10.2890	enolase	1.287	0.81	34.8837	43718	67710	71817	1244.59	0.775966	37.4633	8.82394	127111	297053
Tb927.10.290	proteasome alpha 2 subunit, putative	0.693	0.72	21.5517	3615	5702	6158	194.244	0.695026	5.84694	2.94373	5944.87	6499.5
Tb927.10.2900	importin beta-1 subunit, putative	2.598	0.722	8.45829	3692	6249	6957	56.2527	0.673645	1.69326	2.20271	2647.29	1120.15
Tb927.10.2910	splicing factor PTSR1 interacting protein	1.134	0.689	5.27704	1837	2975	2896	59.3694	0.657053	1.78708	1.75883	1413.05	790.283
Tb927.10.2930	hypothetical protein, conserved	2.247	0.711	5.77778	1709	2687	2659	27.5253	0.66603	0.828539	1.98656	1984.58	455.603
Tb927.10.2940	Soluble NSF attachment protein, SNAP, putative	1.062	0.692	6.57277	2238	3686	3487	77.355	0.661084	2.32846	1.85767	1645.86	1135.54
Tb927.10.2950	hypothetical protein, conserved	5.601	0.695	0.93214	4853	8591	8419	33.8345	0.624001	1.01845	1.1234	404.6	201.901
Tb927.10.2970	hypothetical protein, conserved	0.345	0.702	22.9885	1065	1786	1619	112.455	0.684379	3.38501	2.54791	3973.62	2905.82
Tb927.10.2980	proteasome regulatory non-ATPase subunit 11	0.915	0.719	13.0719	1943	3095	3336	79.617	0.690303	2.39655	2.76108	4972.07	2375.48
Tb927.10.2990	nuclear cap binding complex subunit CBP110	3.012	0.715	2.32172	3937	6807	6737	50.3835	0.662935	1.51659	1.90489	1765.24	773.59
Tb927.10.3010	hook complex protein, conserved	3.669	0.698	2.72331	7520	12882	13173	79.4059	0.640536	2.3902	1.40583	756.384	707.863
Tb927.10.3040	succinate dehydrogenase subunit	0.405	0.701	17.1569	1111	1806	1765	100.437	0.681908	3.02324	2.46393	3618.96	2444.19
Tb927.10.3150	N-acetyltransferase, putative	0.615	0.687	9.70874	1240	2065	2068	75.806	0.663473	2.28183	1.91886	1801.6	1179.25
Tb927.10.3160	hypothetical protein, conserved	0.39	0.676	12.7226	958	1392	1538	87.0952	0.657265	2.62165	1.7639	1424.42	1165.33
Tb927.10.3170	ABC transporter, putative	2.169	0.743	8.7477	1804	3109	3169	32.2994	0.698817	0.972244	3.09906	6861.9	1184.94
Tb927.10.3200	U2 splicing auxiliary factor, putative	0.741	0.735	14.7849	3171	5047	5285	158.655	0.709176	4.77567	3.56651	10154.4	7484.31
Tb927.10.3210	delta-1-pyrroline-5-carboxylate dehydrogenase, putative	1.683	0.764	20.1661	9347	14510	15373	203.826	0.725081	6.13538	4.42518	18536	14146
Tb927.10.3260	Long-chain-fatty-acid--CoA ligase 5 (EC 6.2.1.3) (Long-chain acyl-CoA synthetase 5) (LACS 5), putative	2.109	0.717	18.4659	3685	6036	6859	68.1325	0.673433	2.05086	2.19638	2626.12	1349.74
Tb927.10.3280	60S ribosomal proteins L38, putative	0.246	0.832	16.0643	18034	27496	28444	2610.76	0.81712	78.5863	15.4197	603181	1.6921e+06
Tb927.10.3310	Component of motile flagella 76b	2.838	0.69	2.81591	3168	5584	5293	42.9615	0.639461	1.29318	1.38548	726.23	373.113
Tb927.10.3370	60S acidic ribosomal protein P2, putative	0.342	0.78	20.2899	4523	6923	7170	473.962	0.762456	14.2667	7.34652	76238.6	81493.7
Tb927.10.3390	predicted TLD domain protein	3.816	0.678	1.04739	2486	4712	4546	26.5031	0.619396	0.797768	1.05539	339.91	141.428
Tb927.10.350	protein kinase PK4, putative	1.536	0.727	5.84795	645	1276	1215	17.4971	0.689819	0.526679	2.74302	4881.85	515.951
Tb927.10.3500	RNA-binding protein, putative	2.634	0.708	4.92984	3942	6509	6721	56.7437	0.659311	1.70804	1.81353	1539.08	797.888
Tb927.10.3520	protease regulatory ATPase subunit 4	1.197	0.739	16.6667	2753	4405	4761	86.6376	0.706178	2.60788	3.42441	9065.51	3800.15
Tb927.10.3560	arginine N-methyltransferase, putative	1.167	0.701	13.6752	1582	2696	2759	52.2589	0.668592	1.57304	2.05679	2186.57	920.491
Tb927.10.3570	RNA editing exonuclease 2	2.721	0.719	6.97504	2547	4315	4702	36.7938	0.669514	1.10753	2.08267	2264.19	662.755
Tb927.10.3640	nuclear transmembrane protein, putative	0.852	0.734	7.01754	1000	1647	1851	45.6579	0.706309	1.37435	3.4305	9110.59	2009.06
Tb927.10.3650	NADH-dependent fumarate reductase	3.696	0.733	4.05515	4811	8248	8513	50.6188	0.675325	1.52368	2.25347	2821.03	1049.92
Tb927.10.3660	aspartate aminotransferase	1.209	0.765	24.7525	7308	11470	11691	220.396	0.732014	6.63414	4.86147	24095.6	18099.3
Tb927.10.3700	AMP-activated protein kinase, gamma regulatory subunit	1.506	0.692	4.63883	576	934	1060	14.7976	0.655184	0.445423	1.71481	1316.58	188.239
Tb927.10.3710	proteasome activator protein PA26	0.693	0.79	18.6782	3071	4878	4985	162.687	0.765026	4.89704	7.60714	84025.3	29773.5
Tb927.10.3760	vacuolar ATP synthase subunit d, putative	0.849	0.741	12.9108	2878	4333	4320	119.329	0.713358	3.59192	3.77466	11895.3	6230.62
Tb927.10.3770	predicted TPR repeat protein	2.1	0.734	4.75511	1870	3217	3244	34.4113	0.690526	1.03582	2.76943	5014.11	1032.27
Tb927.10.3790	hypothetical protein, conserved	11.703	0.7	0.427131	4702	8332	8468	15.9008	0.597371	0.478629	0.782848	147.719	49.7124
Tb927.10.380	kinetoplast ribosomal PPR-repeat containing protein 5	1.026	0.73	4.85909	626	952	943	21.5844	0.699613	0.649711	3.13266	7071.46	807.276
Tb927.10.3810	Nucleoporin NUP65	1.785	0.706	2.23714	1895	3264	3051	40.0265	0.665919	1.20484	1.98357	1976.25	660.74
Tb927.10.390	DUF2407 ubiquitin-like domain containing protein, putative	0.447	0.679	15.5556	2677	4383	4349	221.562	0.658943	6.66922	1.80449	1517.77	3087.68
Tb927.10.3900	CAMK/CAMKL family protein kinase, putative	2.22	0.707	3.59874	2484	4640	4528	45.2171	0.662301	1.36108	1.88859	1723.42	683.669
Tb927.10.3920	hypothetical protein, conserved	1.464	0.709	4.77164	1263	2045	1960	31.4732	0.672701	0.947374	2.17469	2554.42	612.525
Tb927.10.3990	DHH1	1.218	0.778	32.76	17708	28530	31976	557.3	0.744891	16.7753	5.78922	39223.4	62560.8
Tb927.10.4000	methylglutaconyl-CoA hydratase, mitochondrial precursor, putative	0.831	0.715	11.9904	815	1387	1440	37.9216	0.687652	1.14148	2.66357	4497.52	1060.92
Tb927.10.4010	hypothetical protein, conserved	2.046	0.722	5.36847	1331	2315	2491	25.9052	0.679088	0.779772	2.37148	3252.75	588.714
Tb927.10.4040	3-keto-dihydrosphingosine reductase	1.044	0.711	11.4613	2431	3885	4167	87.3803	0.680347	2.63023	2.41232	3411.4	2047.39
Tb927.10.4080	hypothetical protein, conserved	3.549	0.702	1.40766	4365	7311	7828	47.6892	0.645484	1.43549	1.50341	912.099	479.372
Tb927.10.4110	60S ribosomal protein L30	0.315	0.816	34.5912	14258	21790	22828	1625.55	0.799163	48.9307	12.0864	305742	681313
Tb927.10.4180	TFIIF-stimulated CTD phosphatase, putative	0.741	0.689	20.1613	3020	4519	4907	146.935	0.663176	4.4229	1.91112	1781.41	2269.28
Tb927.10.4240	hypothetical protein, conserved	0.36	0.73	22.0386	1639	2381	2549	159.588	0.712	4.80376	3.70579	11299.7	8062.57
Tb927.10.4270	coatomer subunit zeta, putative	0.549	0.725	7.24638	948	1615	1680	66.7357	0.702772	2.00881	3.26981	7969.32	2694.92
Tb927.10.4280	ubiquinol-cytochrome c reductase complex 14 kda protein	0.603	0.778	13.2013	555	916	907	34.2666	0.754704	1.03146	6.61335	56858.6	4881.28
Tb927.10.430	peroxidase, putative	1.119	0.701	4.45633	1685	2651	2585	54.1858	0.669265	1.63105	2.07567	2243	970.163
Tb927.10.450	Component of motile flagella 62	1.755	0.699	10.9034	4802	8117	8007	103.7	0.659257	3.12147	1.8122	1535.93	1456.24
Tb927.10.4560	elongation factor 2	2.538	0.838	25.974	60530	97302	104440	900.193	0.790207	27.0967	10.7039	217866	303577
Tb927.10.4610	dolicholphosphate-mannose synthase, putative	0.777	0.727	14.1026	1119	2019	1999	56.9768	0.700556	1.71506	3.173	7328.39	2180.34
Tb927.10.4640	eukaryotic translation initiation factor 3 subunit l	1.464	0.781	12.9516	4711	7903	8262	123.718	0.744701	3.72403	5.77433	38942.6	13824.3
Tb927.10.4690	dynein light chain, putative	0.336	0.728	11.7994	1726	2574	2735	182.555	0.71061	5.49508	3.63659	10720.9	8916.94
Tb927.10.470	choline dehydrogenase, putative	1.575	0.715	8.87199	1118	1873	1833	26.668	0.67735	0.802734	2.31623	3045.71	581.011
Tb927.10.4710	proteasome subunit beta type-2, putative	0.618	0.727	12.8824	2590	3970	4289	153.091	0.703416	4.6082	3.29851	8166.04	6279.59
Tb927.10.4740	nucleolar RNA-binding protein, putative	0.189	0.713	26.0417	417	580	648	75.7461	0.699958	2.28003	3.14737	7164.45	2856.82
Tb927.10.4760	Integral membrane protein DUF106, putative	0.726	0.742	12.3457	3454	5837	5986	182.224	0.716438	5.48512	3.93571	13365.9	10253.4
Tb927.10.4850	hypothetical protein, conserved	1.416	0.717	8.45666	3234	5366	5529	86.7279	0.681301	2.6106	2.44374	3536.81	2079.71
Tb927.10.4880	hypothetical protein, conserved	0.672	0.75	5.92593	1686	2561	2866	92.261	0.725407	2.77715	4.44482	18766.4	6454.04
Tb927.10.4900	TPR-repeat-containing chaperone protein DNAJ, putative	1.497	0.73	4	4008	6564	7307	103.557	0.693294	3.11718	2.8754	5567.86	3322.45
Tb927.10.4940	Nuclear Dbf2-related kinase	1.311	0.677	5.32725	3127	4908	5194	88.0932	0.64265	2.65169	1.44673	819.378	826.66
Tb927.10.4950	U2 small nuclear ribonucleoprotein 16.5K	0.393	0.648	10.101	1074	1527	1633	94.5205	0.629193	2.84516	1.20537	492.435	639.798
Tb927.10.4980	ubiquitin-like protein DSK2, putative	0.906	0.698	7.70077	2842	4340	5032	117.354	0.669445	3.53246	2.08073	2258.3	2110.33
Tb927.10.5010	Elongation factor G1, mitochondrial, putative	2.238	0.705	6.69344	4941	8621	8907	86.8634	0.66012	2.61467	1.83354	1586.92	1245.63
Tb927.10.5020	Eukaryotic translation initiation factor 4E type 5	0.585	0.724	10.2041	1167	2083	2130	79.1228	0.701054	2.38168	3.19453	7467.98	3064.68
Tb927.10.5040	chaperone protein DnaJ, putative	0.87	0.745	9.1638	933	1466	1578	39.8217	0.717018	1.19867	3.96677	13662.2	2272.44
Tb927.10.510	Present in the outer mitochondrial membrane proteome 19	1.002	0.671	7.9602	805	1277	1366	29.9694	0.64097	0.902108	1.41413	768.905	269.99
Tb927.10.5130	Protein C21orf2 homolog, putative	0.825	0.696	4.83092	1545	2572	2519	69.959	0.668751	2.10583	2.06125	2199.8	1237.04
Tb927.10.5140	Mitogen-activated protein kinase 6	1.326	0.7	12.0391	709	1376	1229	21.514	0.665454	0.647593	1.97111	1941.82	351.162
Tb927.10.520	Mitochondrial ATP synthase subunit, putative	1.188	0.729	13.4341	4953	7930	8456	156.38	0.696301	4.7072	2.99509	6238.78	5397.08
Tb927.10.5220	hypothetical protein, conserved	1.341	0.7	2.97619	925	1611	1509	26.2023	0.66526	0.788715	1.96591	1927.56	425.668
Tb927.10.5230	ADP-ribosylation factor, putative	0.81	0.738	9.8401	1414	2348	2317	65.2627	0.711	1.96447	3.65586	10880.1	3218.07
Tb927.10.5250	zinc finger protein family member, putative	1.965	0.731	4.06504	161	313	335	3.51715	0.688946	0.10587	2.71074	4723.25	101.539
Tb927.10.5260	C2 domain containing protein, putative	3.405	0.685	1.76056	1607	2800	2783	18.3147	0.629642	0.551291	1.21273	500.873	125.329
Tb927.10.5300	eukaryotic translation initiation factor 6 (eIF-6), putative	0.744	0.802	12.0482	1178	1863	2013	59.0891	0.776123	1.77864	8.84277	127869	14157.1
Tb927.10.5330	40S ribosomal protein S18, putative	0.459	0.812	41.1255	5046	8374	8611	415.392	0.791675	12.5037	10.9193	230314	145168
Tb927.10.5380	intraflagellar transport protein 122	3.726	0.717	12.6039	3247	5275	5506	32.8187	0.659091	0.987877	1.80814	1526.34	459.018
Tb927.10.540	ATP-dependent RNA helicase SUB2, putative	1.308	0.77	25.1716	5614	9076	9850	163.062	0.73569	4.90834	5.10999	27691.3	14640.8
Tb927.10.5400	hypothetical protein, conserved	1.722	0.686	5.7971	3766	5949	6624	82.605	0.646633	2.48649	1.52702	952.622	853.829
Tb927.10.5450	ISWI complex protein	2.871	0.712	7.65484	3599	6147	6163	48.1336	0.661168	1.44887	1.85978	1651.1	708.022
Tb927.10.5460	60S ribosomal protein L24, putative	0.375	0.803	18.5185	5684	8734	8585	535.735	0.784629	16.1262	9.92404	176413	157790
Tb927.10.5520	AmmeMemoRadiSam system protein B, putative	0.969	0.715	5.14403	1967	3302	3262	76.5123	0.685469	2.3031	2.58584	4140.87	2030.06
Tb927.10.5540	hypothetical protein, conserved	0.813	0.666	7.35294	1068	1906	2005	52.6944	0.63895	1.58615	1.37591	712.327	452.002
Tb927.10.5590	protein phosphatase 2C, putative	1.794	0.705	2.22593	1769	3202	3034	38.6055	0.664818	1.16206	1.95417	1895.62	620.476
Tb927.10.5610	40S ribosomal protein S9, putative	0.57	0.841	20.9424	16264	25393	26422	1041.1	0.81835	31.3383	15.6791	631916	695218
Tb927.10.5620	fructose-bisphosphate aldolase, glycosomal	1.116	0.826	40.2145	78962	119112	127066	2552.32	0.794308	76.8273	11.3162	254436	950826
Tb927.10.5660	heat shock protein, putative	1.005	0.687	3.96825	872	1453	1446	32.6271	0.656925	0.982109	1.75578	1406.22	432.961
Tb927.10.5670	N-acetyltransferase subunit Nat1, putative	2.133	0.729	17.3221	2164	3792	4014	40.3723	0.685186	1.21525	2.57593	4096.76	1063.84
Tb927.10.5760	adenylate kinase, putative	0.645	0.734	9.25926	1139	2005	1879	67.4077	0.709906	2.02904	3.60204	10439.1	3236.77
Tb927.10.5770	Valosin-containing protein	2.34	0.757	21.767	5859	9118	10135	93.6283	0.711109	2.8183	3.66126	10925	4628.98
Tb927.10.5790	hypothetical protein, conserved	1.608	0.716	3.10366	2876	4751	5047	68.452	0.677958	2.06047	2.3354	3116.54	1513.51
Tb927.10.5810	The ARF-like 2 binding protein BART, putative	1.299	0.769	33.7942	21863	35187	37213	631.818	0.734808	19.0183	5.04925	26782.7	55527.4
Tb927.10.5820	predicted RanGDP binding protein	3.009	0.712	1.66003	4193	7564	7453	55.1903	0.659961	1.66128	1.82958	1577.37	788.375
Tb927.10.5830	hypothetical protein, conserved	1.638	0.712	3.65631	2822	4509	4384	62.6145	0.673605	1.88476	2.2015	2643.25	1245.61
Tb927.10.5840	translation elongation factor 1-beta, putative	0.603	0.778	11.5512	15378	24546	25866	948.443	0.754704	28.5491	6.61335	56858.6	135106
Tb927.10.5870	hypothetical protein, conserved	1.368	0.734	5.10576	1049	1836	1972	30.6241	0.698912	0.921817	3.10302	6886.38	1126.05
Tb927.10.5880	Proteophosphoglycan, putative	1.878	0.685	9.03775	2233	3688	3645	44.4101	0.643888	1.33679	1.47122	858.66	429.45
Tb927.10.5940	NEK family Serine/threonine-protein kinase, putative	1.482	0.743	14.8148	1985	3376	3295	50.7744	0.706479	1.52836	3.43842	9169.35	2243.43
Tb927.10.5990	Centrosomal protein of 57 kDa, putative	1.329	0.697	3.003	770	1215	1311	21.6178	0.662415	0.650717	1.89152	1730.89	327.763
Tb927.10.600	Mitochondrial ribosomal protein L29	1.623	0.723	4.30504	1690	2662	2783	38.4052	0.684781	1.15604	2.56183	4034.51	1002.12
Tb927.10.6010	Cohesin subunit SCC3, putative	3.492	0.716	3.14735	2083	3490	3712	23.0799	0.659939	0.694727	1.82905	1576.1	329.518
Tb927.10.6020	hypothetical protein, conserved	0.534	0.745	13.0354	467	809	915	35.2165	0.723077	1.06005	4.30655	17182.8	2328.08
Tb927.10.6030	proteasome subunit alpha type-1, putative	0.798	0.745	23.7203	1419	2274	2378	66.212	0.718201	1.99305	4.03093	14287.6	3888.47
Tb927.10.6050	clathrin heavy chain	5.109	0.79	21.1268	17612	29085	32677	134.721	0.722191	4.05525	4.25507	16615.9	8716.47
Tb927.10.6060	universal minicircle sequence binding protein 2	0.639	0.805	18.6916	2247	3579	4192	135.609	0.781019	4.08198	9.44983	153890	36590
Tb927.10.6070	universal minicircle sequence binding protein 1	0.42	0.817	21.2766	6313	9046	10432	536.337	0.797558	16.1443	11.8262	287730	216205
Tb927.10.6080	proteasome subunit beta type-5, putative	0.93	0.753	9.6463	2069	3256	3335	81.3301	0.724069	2.44811	4.36487	17839.8	5507.53
Tb927.10.6190	aldehyde dehydrogenase, putative	1.509	0.723	5.95238	2327	3497	3710	55.4272	0.686148	1.66841	2.60976	4248.63	1495.06
Tb927.10.6220	5'-3' exoribonuclease D	2.403	0.713	3.32502	2003	3667	3516	33.0307	0.666495	0.994258	1.99913	2019.82	552.938
Tb927.10.6260	ATP-dependent DEAD/H RNA helicase, putative	1.812	0.737	5.50964	1462	2525	2537	31.2162	0.696617	0.939637	3.00793	6313.69	1085.63
Tb927.10.6290	ATP-dependent DEAD/H RNA helicase, putative	1.536	0.75	3.24886	1249	2077	2249	31.467	0.712819	0.947187	3.7472	11655.5	1621.68
Tb927.10.6310	major vault protein, putative	2.586	0.726	7.72499	2470	4128	4232	36.4171	0.677757	1.09619	2.32904	3092.92	801.28
Tb927.10.6320	CBF/Mak21 family, putative	1.839	0.75	2.17155	871	1437	1527	18.1174	0.709317	0.545351	3.57336	10208.9	857.6
Tb927.10.6350	trypanin	1.359	0.715	5.1395	1829	2735	2918	48.2999	0.680027	1.45388	2.40187	3370.35	1122.95
Tb927.10.6360	hypothetical protein, conserved	1.461	0.71	4.09836	2017	3361	3658	53.5894	0.673738	1.6131	2.2055	2656.66	1069.54
Tb927.10.6440	phosphomannomutase	0.735	0.661	12.1951	1567	2415	2619	78.3186	0.63528	2.35747	1.30911	619.98	614.546
Tb927.10.6490	KIAA1430 homologue, putative	0.483	0.639	16.4609	2403	3952	4033	186.441	0.618151	5.61206	1.03771	324.26	965.266
Tb927.10.650	Component of motile flagella 17	0.66	0.745	9.04977	1563	2612	2577	88.8285	0.720628	2.67383	4.16583	15661.8	5533.26
Tb927.10.6550	Poly(ADP-ribose) polymerase and DNA-Ligase Zn-finger region/Zinc-finger (CX5CX6HX5H) motif containing protein, putative	0.72	0.725	5.5325	916	1580	1559	48.7566	0.699544	1.46762	3.12976	7053.2	1820.52
Tb927.10.660	2-oxoisovalerate dehydrogenase alpha subunit, putative	1.248	0.681	7.99361	848	1382	1426	25.502	0.647486	0.767635	1.54479	983.882	269.113
Tb927.10.6610	chaperone protein DnaJ, putative	0.822	0.712	6.06061	2412	4038	4175	112.053	0.684801	3.3729	2.56252	4037.54	2925.22
Tb927.10.6630	ATP-dependent RNA helicase DBP2A, putative	1.704	0.714	8.78735	2729	4397	4627	60.0947	0.674839	1.80891	2.23866	2769.61	1231.84
Tb927.10.6640	transmembrane emp24 domain-containing protein	0.759	0.736	13.1234	4931	7824	8695	245.404	0.709864	7.3869	3.59996	10422.3	11771.6
Tb927.10.6670	dynein light chain, putative	0.375	0.756	15.873	1478	2474	2476	148.196	0.737629	4.46085	5.24617	29799.5	13947.3
Tb927.10.6680	member of the NOL1/NOP2/sun family of proteins	2.22	0.727	2.24921	2335	3990	4054	40.57	0.682301	1.2212	2.4771	3673.16	996.757
Tb927.10.6780	vacuolar protein sorting-associated protein 45, putative	1.767	0.726	6.21469	1385	2335	2477	30.4006	0.686121	0.915089	2.60884	4244.42	819.487
Tb927.10.6800	developmentally regulated GTP-binding protein, putative	1.104	0.782	14.4535	3001	4757	5302	102.845	0.750479	3.09574	6.24499	48457.5	13222.1
Tb927.10.6810	guanylate kinase, putative	0.792	0.72	7.54717	1451	2598	2519	71.6014	0.693302	2.15527	2.87568	5569.39	2297.61
Tb927.10.6820	hypothetical protein, conserved	0.942	0.69	6.34921	1079	1811	1900	44.0575	0.660883	1.32617	1.85261	1633.39	643.597
Tb927.10.6840	hypothetical protein, conserved	0.885	0.739	5.63063	1268	2073	2101	53.5075	0.710778	1.61063	3.64486	10789	2624.23
Tb927.10.6880	glyceraldehyde 3-phosphate dehydrogenase, cytosolic	0.993	0.769	23.0924	6525	10390	10975	244.665	0.739105	7.36465	5.35228	31511.5	23866.5
Tb927.10.6960	hypothetical protein, conserved	0.96	0.739	13.4995	2062	3612	3568	83.2909	0.709606	2.50714	3.5874	10321.2	3970.4
Tb927.10.7020	acid phosphatase, putative	1.305	0.698	8.40979	1303	2137	2242	37.8498	0.663729	1.13932	1.92552	1819.1	592.463
Tb927.10.7060	Nucleoporin NUP96	2.649	0.728	9.04977	3797	6281	6475	54.3828	0.679173	1.63698	2.3742	3263.14	1238.42
Tb927.10.7090	Alternative oxidase, mitochondrial	0.987	0.784	25.2525	7755	12278	14183	300.764	0.754196	9.05331	6.5679	55775.2	42318.3
Tb927.10.7100	delta-4 fatty acid desaturase	1.263	0.72	3.15956	666	1071	1058	19.3349	0.686285	0.582	2.61463	4270.78	523.27
Tb927.10.7110	inositol-3-phosphate synthase, putative	1.584	0.726	6.3012	3871	6482	6851	94.2137	0.688243	2.83593	2.68499	4599.17	2673.85
Tb927.10.7120	hypothetical protein, conserved	0.975	0.747	7.15746	3113	5123	5568	122.717	0.717377	3.69391	3.98616	13849.3	7064.26
Tb927.10.7130	hypothetical protein, conserved	2.238	0.705	3.12361	1491	2720	2904	27.3385	0.66012	0.822915	1.83354	1586.92	392.036
Tb927.10.720	PB1 domain containing protein, putative	3.249	0.708	1.23001	3565	6254	6213	42.7672	0.653925	1.28733	1.68577	1255.32	527.659
Tb927.10.7200	TPR repeat, putative	2.538	0.708	3.93546	1749	3107	3197	27.4114	0.660207	0.82511	1.83569	1592.13	393.909
Tb927.10.7230	Flagellar Member 1	7.563	0.72	8.59107	10159	16749	17597	51.2202	0.637497	1.54178	1.34907	674.228	424.133
Tb927.10.7280	pre-mRNA splicing factor ATP-dependent RNA helicase, putative	3.186	0.742	1.88147	2621	4891	4617	32.864	0.688452	0.989239	2.69261	4635.68	937.449
Tb927.10.7290	Flagellar Member 2	3.465	0.731	5.76701	3109	5715	5630	35.9972	0.675156	1.08355	2.24833	2803.1	743.591
Tb927.10.730	ATP synthase, putative	1.404	0.734	8.52878	1437	2517	2334	38.9031	0.698453	1.17102	3.08378	6767.89	1414.63
Tb927.10.7330	40S ribosomal protein S24E, putative	0.411	0.832	21.7391	13326	20634	22265	1188.87	0.812767	35.7863	14.5356	511579	693271
Tb927.10.7350	hypothetical protein, conserved	5.382	0.738	1.29991	5698	9554	9870	40.5847	0.668403	1.22164	2.05153	2170.98	711.589
Tb927.10.740	structural maintenance of chromosome 4, putative	4.098	0.703	1.7069	3754	6252	6359	34.7668	0.642269	1.04652	1.43928	807.654	323.247
Tb927.10.7410	succinyl-CoA ligase [GDP-forming] beta-chain, putative	1.257	0.8	25.3968	8756	13840	14816	259.458	0.766365	7.80994	7.74657	88392.7	49052.5
Tb927.10.7420	bromodomain factor 2 protein, putative	0.672	0.773	13.3333	1670	2701	2781	92.5438	0.748407	2.78566	6.072	44804.9	11314.3
Tb927.10.7440	MTR4	2.85	0.738	9.46372	3643	6052	6125	48.3354	0.687354	1.45494	2.65282	4447.09	1342.52
Tb927.10.750	hypothetical protein, conserved	0.378	0.665	10.4987	1120	1793	1724	106.783	0.646555	3.21428	1.52542	949.85	1101.68
Tb927.10.7500	fibrillarin	0.9	0.679	17.7187	4667	7375	7844	192.505	0.65054	5.7946	1.61012	1104.39	2187.74
Tb927.10.7550	hypothetical protein, conserved	1.668	0.694	2.99222	2085	3594	3693	48.6644	0.655255	1.46485	1.71645	1320.09	620.114
Tb927.10.7570	dihydrolipoamide acetyltransferase E2 subunit, putative	1.353	0.759	21.3864	5918	9289	9606	160.304	0.724104	4.8253	4.36696	17863.7	10864.8
Tb927.10.7610	NADH-ubiquinone oxidoreductase complex I subunit, putative	4.296	0.711	1.16306	4974	8872	9163	46.2648	0.64882	1.39262	1.57299	1034.81	504.28
Tb927.10.7620	mitochondrial ATP-dependent zinc metallopeptidase, putative	1.971	0.682	2.02634	3545	5831	6196	68.6681	0.639882	2.06698	1.39342	737.902	602.502
Tb927.10.7630	transportin2- like protein	2.823	0.704	3.53857	2223	3930	3852	30.7079	0.653595	0.924337	1.67824	1239.73	375.846
Tb927.10.7680	GTPase activating protein, putative	1.59	0.739	8.1607	4747	7600	8382	113.379	0.701171	3.41281	3.19961	7501.12	4404.02
Tb927.10.7690	Component of motile flagella 4	2.172	0.728	13.3333	4644	7750	8152	82.1463	0.683787	2.47268	2.52753	3885.58	2092.36
Tb927.10.770	RF-1 domain containing protein, putative	1.896	0.707	4.73934	1431	2548	2628	30.0819	0.665691	0.905495	1.97746	1959.32	493.844
Tb927.10.7700	ATP-binding cassette protein subfamily G	2.004	0.74	7.9721	2115	3476	3660	40.1455	0.697531	1.20842	3.04547	6535.94	1427.51
Tb927.10.7740	protein transport protein SEC23	2.232	0.74	4.9217	3923	6740	6685	67.4876	0.69518	2.03144	2.9499	5979.69	2266.64
Tb927.10.7810	hypothetical protein, conserved	2.136	0.715	3.27256	2371	4263	4403	44.5663	0.671155	1.34149	2.12955	2409.25	835.385
Tb927.10.7880	Sperm tail/Sperm tail C-terminal domain containing protein, putative	1.953	0.719	3.57873	1749	2899	2872	33.5562	0.677075	1.01007	2.3076	3014.15	726.214
Tb927.10.790	vesicle-associated membrane protein, putative	0.717	0.684	8.33333	1796	2868	3043	93.4769	0.658597	2.81375	1.79606	1498.06	1291.82
Tb927.10.7930	2,3-bisphosphoglycerate-independent phosphoglycerate mutase	1.653	0.787	19.9275	14262	23527	24759	328.844	0.748429	9.89853	6.07381	44842.1	40225.6
Tb927.10.7990	replication factor C subunit 3, putative	1.047	0.737	5.71429	2607	4132	4422	92.8582	0.706303	2.79512	3.43023	9108.6	4085.41
Tb927.10.8000	hypothetical protein, conserved	3.987	0.726	2.75689	4155	7225	7000	40.0467	0.666098	1.20545	1.98838	1989.66	663.947
Tb927.10.8010	hypothetical protein, conserved	0.732	0.721	5.44218	1148	2052	1925	60.5357	0.695333	1.82219	2.95601	6014.3	2040.7
Tb927.10.8020	prolyl endopeptidase	2.094	0.766	21.9361	8339	13224	14393	149.65	0.722588	4.50462	4.27806	16867.6	9776.19
Tb927.10.8030	Mitochondrial ATP synthase subunit 5	0.765	0.789	24.7396	1080	1764	1872	53.4959	0.762761	1.61028	7.37697	77123.4	9266.51
Tb927.10.8040	beta adaptin, putative	2.085	0.753	10.0575	7067	11314	12459	128.703	0.709681	3.87408	3.59106	10350.6	6146.37
Tb927.10.8060	SET domain containing protein, putative	1.371	0.728	6.55022	2225	3502	3838	60.7846	0.692873	1.82968	2.85901	5479.8	1930.32
Tb927.10.8080	Uncharacterized conserved protein (DUF2042), putative	2.22	0.741	8.09717	3851	6779	6919	68.3703	0.696301	2.05801	2.99508	6238.69	2359.61
Tb927.10.8170	Nucleoporin NUP144	3.975	0.718	7.79286	5039	8703	9244	50.045	0.658188	1.5064	1.78611	1475.03	684.765
Tb927.10.8190	T-complex protein 1, theta subunit, putative	1.611	0.756	20.4461	10593	16996	18751	250.101	0.717922	7.52829	4.01574	14137.9	14588.9
Tb927.10.8200	Ribosomal protein L1p/L10e family, putative	0.807	0.69	7.40741	1736	2883	3007	81.9478	0.66305	2.46671	1.90787	1772.97	1261.76
Tb927.10.8230	protein disulfide isomerase 2	1.491	0.771	16.0643	32553	50505	55132	809.054	0.734368	24.3533	5.01921	26340.6	70348.7
Tb927.10.8240	hypothetical protein, conserved	1.122	0.669	3.55556	3384	5917	5894	117.196	0.637223	3.52772	1.34405	667.259	964.005
Tb927.10.8270	eukaryotic translation initiation factor 3 subunit c	2.22	0.713	13.4953	3621	6034	6477	63.0512	0.668301	1.8979	2.0487	2162.65	1102.78
Tb927.10.830	adenylate kinase, putative	0.78	0.679	19.1571	2917	4856	4854	140.627	0.652505	4.23302	1.65361	1189.64	1676.25
Tb927.10.8360	Poly(A)-specific ribonuclease PARN-2	1.527	0.673	2.77778	1436	2473	2507	36.413	0.635928	1.09607	1.32067	635.371	290.254
Tb927.10.840	Flagellum attachment zone protein 6	5.157	0.695	5.42636	6204	11063	11810	48.6339	0.626873	1.46393	1.16803	451.049	311.169
Tb927.10.8420	Phosphatidylinositol 3-kinase tor1	7.296	0.713	0.54802	5875	10360	10636	31.8694	0.631967	0.959301	1.25158	546.923	230.744
Tb927.10.8430	40S ribosomal protein S12, putative	0.426	0.772	32.634	8737	13816	14529	755.979	0.752419	22.7557	6.41157	52149.9	101879
Tb927.10.8540	chaperone protein DnaJ, putative	1.008	0.739	12.8586	3360	5389	5609	124.084	0.70888	3.73506	3.55225	10041.5	5811.68
Tb927.10.8630	Sucrase/ferredoxin-like, putative	0.765	0.705	13.0208	2127	3534	3679	105.86	0.678761	3.18648	2.36097	3212.66	2386.67
Tb927.10.8650	hypothetical protein, conserved	1.011	0.711	4.93097	1680	2494	2509	58.1737	0.680835	1.75109	2.42835	3475.02	1379.31
Tb927.10.8660	Fis1 C-terminal tetratricopeptide repeat, putative	0.723	0.67	5.50964	1161	1929	1860	59.5741	0.644491	1.79324	1.48331	878.484	584.586
Tb927.10.8720	CCR4-NOT transcription complex subunit 10, putative	1.665	0.744	9.59233	5144	8454	8446	115.407	0.70529	3.47386	3.3834	8765.9	4954.07
Tb927.10.8730	ABC1 family, putative	1.326	0.721	5.66038	205	367	344	5.98304	0.686454	0.180095	2.62064	4298.23	162.589
Tb927.10.8780	AAA domain containing protein, putative	6.507	0.736	3.0722	7628	13579	13986	46.7456	0.659474	1.40709	1.81753	1548.57	659.897
Tb927.10.8830	Flagellum attachment zone protein 5	1.755	0.731	2.84414	3757	6343	7012	84.3328	0.691257	2.5385	2.79703	5154.77	2575.11
Tb927.10.8880	hypothetical protein	1.71	0.699	2.33508	1909	3259	3141	42.2607	0.65977	1.27209	1.82485	1566.03	600.892
Tb927.10.8890	kinetoplast DNA-associated protein, putative	0.627	0.654	7.93651	1028	1737	1698	61.7457	0.630245	1.85861	1.22269	512.43	428.759
Tb927.10.8910	Nucleoporin NUP181	4.992	0.727	1.2012	4570	7850	8185	35.7799	0.659972	1.07701	1.82985	1578.03	511.241
Tb927.10.8920	ras-like small GTPase, putative	1.017	0.736	7.84314	1614	2600	2545	58.0489	0.705746	1.74733	3.40442	8918.64	2519.63
Tb927.10.8930	paraflagellar rod component, putative	2.13	0.711	11.2518	6033	9645	10560	107.235	0.667216	3.22789	2.01879	2075.7	1826.84
Tb927.10.8940	flagellum targeting protein kharon1, putative	1.233	0.786	29.9353	34341	51878	57808	1021.06	0.752688	30.7348	6.43495	52682.3	138502
Tb927.10.8980	hypothetical protein, conserved	0.507	0.741	9.80392	3631	5613	6273	265.902	0.719639	8.00392	4.11032	15086.5	16170.5
Tb927.10.9080	pteridine transporter, putative	1.92	0.744	5.20021	3350	5309	5485	64.3707	0.702431	1.93762	3.25473	7867.2	2577.99
Tb927.10.9150	hypothetical protein, conserved	0.9	0.742	6.64452	1917	3422	3554	85.1	0.71354	2.56159	3.78398	11977.4	4463.05
Tb927.10.9190	isoleucyl-tRNA synthetase, putative	3.429	0.756	17.316	16296	25617	27175	176.092	0.700447	5.30055	3.16834	7298.4	6720.85
Tb927.10.920	Ribosomal protein L1p/L10e family, putative	0.891	0.708	6.71141	298	535	554	13.4004	0.679682	0.403365	2.39066	3326.64	308.954
Tb927.10.9250	adenylyl cyclase-associated protein, putative	0.807	0.746	17.284	3685	5905	5998	168.367	0.71905	5.06802	4.07763	14754.2	10093.7
Tb927.10.9260	hypothetical protein, conserved	0.972	0.716	5.12821	1170	1910	1957	45.0887	0.686423	1.35721	2.61953	4293.13	1224.35
Tb927.10.9330	hypothetical protein, conserved	1.809	0.676	3.86313	2174	3943	3892	47.7691	0.63565	1.4379	1.31569	628.719	378.213
Tb927.10.9360	L-2-hydroxyglutarate dehydrogenase, mitochondrial, putative	1.56	0.704	9.59693	1948	2997	3434	46.8129	0.66653	1.40911	2.00008	2022.48	784.316
Tb927.10.9400	branch point binding protein, putative	0.813	0.77	9.80392	1730	3092	3202	84.972	0.74295	2.55774	5.6388	36445.9	9099.68
Tb927.10.9430	phosphoribosylpyrophosphate synthetase, putative	1.131	0.775	7.93651	4333	7078	7514	145.384	0.743095	4.37622	5.64993	36647	15624.3
Tb927.10.9440	NADH dehydrogenase	1.473	0.716	8.80759	3548	5743	6113	90.9919	0.67959	2.73895	2.38767	3315.04	2093.18
Tb927.10.9570	paraflagellar rod component, putative	3.246	0.698	19.0828	14735	23718	25636	171.952	0.64395	5.17592	1.47246	860.679	1665.3
Tb927.10.9640	hypothetical protein, conserved	1.023	0.693	7.79727	1223	2136	2086	46.0978	0.662657	1.38759	1.89772	1746.79	703.033
Tb927.10.9650	Nucleoporin NUP152	4.218	0.728	4.5013	3809	6635	6786	35.3877	0.666387	1.0652	1.99619	2011.54	590.835
Tb927.10.970	Tetratricopeptide repeat, putative	5.268	0.701	0.758869	5426	9397	9513	40.0696	0.632144	1.20614	1.25458	550.597	291.365
Tb927.10.9700	predicted C2 domain protein	3.543	0.704	4.51213	1827	3061	3248	19.9353	0.647531	0.600073	1.54575	985.581	210.603
Tb927.10.9720	RNA-editing-associated protein 1	1.773	0.659	3.37838	2343	3862	3598	48.3509	0.619054	1.45541	1.0505	335.534	255.878
Tb927.10.9740	Regulatory particle triple-A ATPase subunit 6	1.224	0.73	17.1149	3113	5155	5264	96.1242	0.69681	2.89343	3.01581	6359.92	3358.68
Tb927.10.9770	gamma-tubulin complex component 2	2.352	0.735	1.69851	1674	2936	2808	27.3758	0.688991	0.824039	2.71239	4731.27	791.19
Tb927.10.9780	ATP-dependent DEAD/H RNA helicase, putative	2.634	0.712	3.41297	2079	3729	3686	31.1688	0.663311	0.938212	1.91464	1790.57	482.961
Tb927.10.9810	hypothetical protein, conserved	0.903	0.75	8.83002	1124	1776	1686	44.5034	0.721492	1.3396	4.21495	16182.4	2830.95
Tb927.10.9820	mitochondrial intermediate peptidase, putative	2.025	0.73	8.38264	1889	3387	3343	36.7973	0.687309	1.10764	2.65121	4439.53	1020.93
Tb927.10.9830	Mitochondrial ATP synthase subunit, putative	0.471	0.728	21.097	1667	2530	2859	130.276	0.707411	3.92143	3.48217	9498.61	5887.91
Tb927.10.9840	chaperone protein DnaJ, putative	0.786	0.685	15.2091	2420	4062	4143	117.212	0.658403	3.5282	1.79133	1487.09	1612.21
Tb927.10.9870	Component of motile flagella 12	0.795	0.749	13.7845	1163	2056	2052	57.2428	0.722251	1.72306	4.25856	16653.9	3709.04
Tb927.10.9890	hypothetical protein, conserved	2.613	0.705	7.64526	2020	3526	3838	30.9969	0.656506	0.933037	1.74582	1384.08	407.161
Tb927.10.9910	PSP1 C-terminal conserved region, putative	1.347	0.705	5.18519	2736	4827	5002	80.5314	0.670182	2.42408	2.10164	2322.17	1474.31
Tb927.10.9970	hypothetical protein, conserved	3.072	0.73	3.25203	3346	5260	5576	40.3452	0.677419	1.21443	2.31838	3053.59	880.452
Tb927.11.10010	vacuolar sorting-associated protein-like, putative	1.071	0.73	4.65549	2156	3758	4048	80.2041	0.698953	2.41422	3.10478	6897.26	2952.09
Tb927.11.10020	short-chain dehydrogenase, putative	0.939	0.681	4.24628	1684	2607	2971	67.2938	0.651929	2.02561	1.64076	1164.02	791.006
Tb927.11.10060	Biotin--acetyl-CoA-carboxylase ligase, putative	0.741	0.706	20.1613	2282	3699	3660	113.38	0.680176	3.41285	2.40671	3389.33	2645.54
Tb927.11.10070	Bromodomain, putative	0.663	0.749	12.012	1490	2590	2681	87.975	0.724573	2.64814	4.39478	18182.9	6030.77
Tb927.11.10090	hypothetical protein, conserved	1.245	0.715	7.21154	2565	3994	4010	74.3663	0.681526	2.2385	2.4512	3567.03	1793.05
Tb927.11.1010	chaperone protein DnaJ, putative	1.113	0.711	3.58423	1686	2886	2855	57.8928	0.67935	1.74263	2.37992	3285.14	1324.04
Tb927.11.10140	hypothetical protein, conserved	0.807	0.752	8.64198	710	1152	1168	32.6866	0.72505	0.983899	4.42333	18514.4	2266.82
Tb927.11.10150	Enoyl-CoA hydratase/isomerase family, putative	3.633	0.729	2.47525	4226	7493	7730	46.2682	0.671819	1.39272	2.14881	2470.53	881.376
Tb927.11.1020	ribokinase, putative	0.999	0.78	14.9701	5910	9562	9651	219.203	0.750015	6.59823	6.20585	47615	27866.1
Tb927.11.10200	hypothetical protein, conserved	1.47	0.682	6.78887	3594	6139	6018	93.0827	0.645627	2.80188	1.50633	917.058	938.929
Tb927.11.10220	hypothetical protein, conserved	0.354	0.672	14.0056	1125	1750	1826	115.417	0.654151	3.47416	1.69094	1266.08	1431.82
Tb927.11.10240	ATP-dependent protease subunit HslV	0.627	0.762	14.2857	2174	3629	3810	132.699	0.738245	3.99437	5.2902	30502.4	12677
Tb927.11.1030	kinetoplastid kinetochore protein 7	1.932	0.677	2.06718	4013	6387	6463	76.3145	0.635301	2.29714	1.30948	620.466	599.122
Tb927.11.10300	hypothetical protein, conserved	1.233	0.752	8.89968	1587	2485	2925	49.2718	0.718688	1.48313	4.05764	14553.3	2928.03
Tb927.11.10330	regulator of chromosome condensation 1-like protein	1.938	0.701	4.12159	2193	3661	3796	43.263	0.659236	1.30226	1.81169	1534.73	607.228
Tb927.11.10340	Serine/threonine-protein phosphatase PGAM5, mitochondrial, putative	0.912	0.704	4.37158	1614	2580	2646	65.3868	0.67535	1.96821	2.25425	2823.74	1357.06
Tb927.11.10370	glycosyl hydrolase-like protein	3.165	0.708	1.89394	2669	4658	4916	33.4454	0.654629	1.00674	1.70194	1289.19	419.756
Tb927.11.10430	hypothetical protein, conserved	1.704	0.701	5.27241	2501	4194	4311	56.1039	0.661839	1.68878	1.87678	1693.54	838.809
Tb927.11.10480	PQQ-like domain/WD domain, G-beta repeat/Utp21 specific WD40 associated putative domain containing protein, putative	2.925	0.747	2.04918	1782	3162	3160	23.9754	0.695692	0.721682	2.97044	6096.6	815.304
Tb927.11.10510	ubiquinone biosynthesis methyltransferase, putative	0.864	0.724	13.8408	2027	3187	3336	86.322	0.696115	2.59838	2.98751	6194.83	2965.71
Tb927.11.10540	hypothetical protein, conserved	2.565	0.725	14.0187	9148	14679	15566	133.895	0.676953	4.03037	2.30379	3000.28	2889.16
Tb927.11.10560	eukaryotic translation initiation factor 4 gamma 4	2.091	0.718	14.3266	4660	7795	7970	84.9202	0.674619	2.55618	2.232	2746.68	1731.46
Tb927.11.10570	LSU ribosomal protein, mitochondrial, putative	0.999	0.675	3.99202	1300	2194	2277	50.059	0.645015	1.50683	1.49388	896.069	497.502
Tb927.11.10620	hypothetical protein, conserved	0.573	0.669	12.1528	879	1545	1552	59.8382	0.646291	1.80119	1.51996	940.391	613.399
Tb927.11.10660	Basal body protein	12.249	0.705	0.308528	7980	13355	15402	19.6157	0.600004	0.590451	0.811312	163.195	65.3747
Tb927.11.10690	hypothetical protein, conserved	1.224	0.73	8.14996	4450	7150	7753	137.495	0.69681	4.13874	3.01581	6359.92	4804.22
Tb927.11.1070	glycosomal transporter (GAT3), putative	2.052	0.721	6.32603	5297	9027	9454	100.422	0.678026	3.02279	2.33754	3124.53	2224.03
Tb927.11.10760	kinesin-D	1.851	0.735	19.9569	4196	6926	7338	86.6531	0.694185	2.60835	2.91032	5758.58	2840.83
Tb927.11.10770	VHS domain containing protein, putative	1.374	0.723	7.26216	2655	4234	4283	71.0338	0.687835	2.13819	2.67017	4528.68	1996.11
Tb927.11.10780	hypothetical protein, conserved	0.837	0.721	11.9048	1492	2490	2659	68.698	0.693554	2.06788	2.88553	5622.75	2217.96
Tb927.11.10800	Domain of unknown function (DUF4496), putative	0.786	0.696	12.6743	2531	4233	4463	123.696	0.669403	3.72338	2.07955	2254.73	2222.13
Tb927.11.10820	Casein kinase II subunit beta, putative	0.882	0.751	5.64972	2930	4911	4951	125.901	0.722826	3.78976	4.29187	17019.8	8272.32
Tb927.11.10860	20S-pre-rRNA D-site endonuclease NOB1	1.296	0.698	5.38876	1837	3140	3028	53.682	0.663847	1.61588	1.92861	1827.27	842.701
Tb927.11.10900	Component of motile flagella 9	2.544	0.731	5.88928	3845	6194	6377	56.3182	0.68315	1.69523	2.50579	3793.1	1412.49
Tb927.11.10960	2OG-Fe(II) oxygenase superfamily, putative	1.95	0.734	4.60829	1789	3357	3311	37.3201	0.692107	1.12337	2.82947	5323.29	1163.34
Tb927.11.10990	methylthioribose-1-phosphate isomerase, putative	1.158	0.728	11.1972	2291	3904	4111	77.0209	0.695717	2.3184	2.97144	6102.32	2620.74
Tb927.11.1100	cysteine peptidase, Clan CA, family C2, putative	4.227	0.733	1.82315	433	523	941	5.02897	0.671321	0.151377	2.13436	2424.44	94.648
Tb927.11.11000	Calponin homology (CH) domain containing protein, putative	1.479	0.719	4.04858	2744	4555	4634	70.1755	0.682516	2.11235	2.48432	3703.13	1733.14
Tb927.11.11010	hypothetical protein, conserved	1.044	0.79	29.6084	11462	17197	18401	394.99	0.759347	11.8896	7.04321	67778.5	62978.9
Tb927.11.11080	Nucleoporin NUP149	4.317	0.729	2.31481	5019	8087	9091	44.6951	0.666668	1.34537	2.00382	2033.06	751.342
Tb927.11.11120	hypothetical protein, conserved	0.594	0.678	6.70017	712	1165	1176	44.655	0.654879	1.34416	1.70772	1301.44	563.852
Tb927.11.11140	hypothetical protein	2.976	0.698	2.68546	4376	8078	8212	59.8026	0.646247	1.80012	1.51905	938.819	612.376
Tb927.11.11210	paraflagellar rod component, putative	1.08	0.736	9.23361	3819	6395	6476	134.218	0.704823	4.0401	3.36206	8612.55	5696.72
Tb927.11.11220	dynein heavy chain, putative	12.726	0.743	3.84948	11841	19747	22813	36.9918	0.635979	1.11349	1.32158	636.598	295.233
Tb927.11.11250	cytosolic malate dehydrogenase	0.984	0.747	20.2634	5799	9540	10513	227.576	0.717241	6.85027	3.97879	13778	13057.2
Tb927.11.11280	hypothetical protein, conserved	3.12	0.719	2.56164	3124	5291	5370	38.3929	0.666009	1.15566	1.98601	1983.03	635.168
Tb927.11.11290	heat shock protein 70, putative	2.028	0.758	5.90842	4689	7892	7932	87.9488	0.715278	2.64735	3.87424	12791.6	4811.23
Tb927.11.11330	heat shock protein 70	2.07	0.842	20.6445	50025	77763	88388	949.88	0.798838	28.5923	12.0332	302005	394992
Tb927.11.11360	receptor for activated C kinase 1	0.954	0.795	29.2581	40526	62997	65645	1549.58	0.765698	46.644	7.6768	86189.6	288255
Tb927.11.11380	hypothetical protein, conserved	1.65	0.735	7.25953	1698	3035	2863	39.8847	0.696464	1.20057	3.00172	6277.36	1381.98
Tb927.11.11430	cullin 1, putative	2.415	0.7	2.48139	2482	4396	4480	40.6591	0.653379	1.22388	1.67334	1229.66	495.047
Tb927.11.11460	Mitochondrial import receptor subunit ATOM69	1.869	0.757	16.0256	5616	9556	10098	117.123	0.715987	3.5255	3.91167	13139.4	6518.39
Tb927.11.11480	Trichohyalin, putative	1.974	0.739	9.1047	7440	12418	13115	145.003	0.69685	4.36473	3.01747	6369.7	5071.54
Tb927.11.1150	radial spoke protein 3	0.996	0.722	10.01	2826	4638	4583	105.378	0.69206	3.17199	2.82766	5313.79	3281.07
Tb927.11.11520	glycosomal membrane protein	0.654	0.794	19.7869	9198	15049	15982	533.32	0.769739	16.0535	8.10927	100428	109433
Tb927.11.11570	Translation initiation factor eIF-2B subunit epsilon, putative	2.4	0.716	7.49064	2625	4848	4742	43.8971	0.669524	1.32135	2.08297	2265.09	790.908
Tb927.11.11590	Eukaryotic translation initiation factor 3 subunit E	1.239	0.756	13.6876	6080	9704	10750	186.163	0.722607	5.60368	4.27916	16879.6	12167
Tb927.11.1160	Region in Clathrin and VPS, putative	3.321	0.703	1.50421	2870	5084	4921	33.6093	0.648329	1.01167	1.56256	1015.78	362.001
Tb927.11.11630	LSU ribosomal protein, mitochondrial, putative	0.726	0.697	5.48697	858	1437	1422	44.4563	0.671438	1.33818	2.13776	2435.23	839.078
Tb927.11.11680	2-oxoglutarate dehydrogenase E2 component, putative	1.149	0.808	19.0972	5551	8930	9341	180.572	0.775843	5.43539	8.80916	126518	42969.1
Tb927.11.11690	Vacuolar proton pump subunit B, putative	1.485	0.769	22.8495	10477	17403	18149	269.245	0.732442	8.10453	4.88978	24489.2	22341.9
Tb927.11.11700	nucleotidyl transferase, putative	1.755	0.721	4.55063	3028	5218	5076	65.9283	0.681257	1.98451	2.44227	3530.9	1579.25
Tb927.11.11720	FG-GAP repeat protein, putative	1.866	0.698	2.67523	2989	5273	5190	62.4297	0.65702	1.8792	1.75803	1411.25	830.341
Tb927.11.11740	membrane-bound acid phosphatase, putative	1.485	0.747	3.32668	1794	3191	2934	45.8085	0.710442	1.37888	3.62829	10652.7	2228.4
Tb927.11.11770	Eukaryotic translation initiation factor 4E-3	1.326	0.746	9.78179	2221	3774	3951	64.9721	0.711454	1.95572	3.67846	11068.8	3239.28
Tb927.11.11780	acyl-CoA dehydrogenase, putative	1.821	0.725	2.74123	1852	3357	3081	39.4406	0.684517	1.1872	2.55267	3994.37	1022.55
Tb927.11.1180	cdc2-related kinase 6, putative	0.975	0.704	4.08998	1132	1983	1873	44.3579	0.674377	1.33522	2.22469	2721.67	899.132
Tb927.11.11820	40S ribosomal protein S17, putative	0.426	0.849	34.965	9208	14857	15344	802.428	0.829419	24.1539	18.2188	960612	701006
Tb927.11.11850	splicing factor 3B subunit 1, putative	3.297	0.737	5.45455	3720	6386	6772	44.3277	0.682527	1.33431	2.48471	3704.71	1095.07
Tb927.11.11900	Coatomer subunit gamma	2.634	0.747	12.5142	6347	10441	11490	93.1797	0.698311	2.8048	3.07786	6731.71	3376.65
Tb927.11.12030	hypothetical protein, conserved	1.167	0.678	3.73483	681	1199	1212	22.8982	0.645592	0.689259	1.50561	915.835	230.778
Tb927.11.12040	hypothetical protein, conserved	0.477	0.71	12.3457	1049	1638	1715	119.014	0.68928	3.58242	2.72304	4783.31	3463.84
Tb927.11.12060	Peroxisomal biogenesis factor 11 (PEX11), putative	0.948	0.697	4.2061	1173	1966	1825	45.6493	0.66779	1.37409	2.03456	2121.27	788.582
Tb927.11.12150	flagellar pocket cytoskeletal protein bilbo1	1.761	0.724	18.1406	3251	5498	6016	72.5432	0.684189	2.18362	2.54136	3945.19	1865.89
Tb927.11.12210	Domain of unknown function (DUF4586), putative	0.873	0.756	20.5479	4488	7287	7842	195.074	0.72797	5.87193	4.602	20676.9	14522
Tb927.11.12220	catalytic subunit of the vacuolar transporter chaperone 4	2.379	0.75	2.93871	2257	4029	4015	37.4425	0.703728	1.12706	3.3125	8262.98	1547.51
Tb927.11.12230	ATP-dependent protease ATPase subunit HslU2	1.488	0.731	10.0604	2489	4227	4382	64.6557	0.694405	1.9462	2.91904	5806.79	2131.04
Tb927.11.12240	cysteine peptidase, Clan CA, family C19, putative	2.37	0.725	2.52845	4133	6847	6932	65.8154	0.678816	1.98111	2.36272	3219.33	1485.83
Tb927.11.12440	Plus-3 domain/Zinc finger, C3HC4 type (RING finger), putative	1.221	0.703	3.37553	1341	2240	2296	43.1791	0.66985	1.29973	2.09221	2293.22	784.155
Tb927.11.12480	Kinetochore interacting phosphatase 7	1.911	0.743	3.1348	2166	3532	3521	42.1007	0.701528	1.26727	3.21513	7603.1	1649.56
Tb927.11.1250	Mitochondrial SSU ribosomal protein, putative	2.622	0.71	3.80952	2703	4798	4630	40.0969	0.661422	1.20696	1.86621	1667.06	593.457
Tb927.11.12500	hypothetical protein, conserved	1.053	0.74	4.73485	1313	2296	2340	48.8273	0.709215	1.46975	3.56843	10169.6	2305.57
Tb927.11.12530	Flagellum attachment zone protein 3	2.418	0.74	17.3482	5499	9592	9822	89.1921	0.69335	2.68477	2.87758	5579.63	2865.45
Tb927.11.12560	hypothetical protein	2.352	0.728	2.9724	3955	6873	6813	65.0546	0.681991	1.95821	2.46672	3630.37	1586.34
Tb927.11.1260	copper-transporting ATPase-like protein, putative	2.883	0.717	1.386	6260	10263	10615	81.9936	0.666062	2.46809	1.98742	1986.97	1358.22
Tb927.11.12610	cyclin 1	1.164	0.701	7.9602	1336	2286	2225	50.6526	0.668633	1.52469	2.05796	2190.02	893.101
Tb927.11.12640	PH domain containing protein, putative	2.922	0.703	2.73504	6238	10653	10060	80.3534	0.651718	2.41872	1.63607	1154.77	939.691
Tb927.11.12680	prefoldin subunit 2, putative	0.435	0.777	18.2648	2215	3200	3420	178.011	0.757214	5.3583	6.84233	62522.2	26950.3
Tb927.11.1270	Mitochondrial ATP synthase subunit, putative	0.507	0.759	13.7255	1618	2721	2674	119.884	0.737639	3.60862	5.24689	29810.8	11285.5
Tb927.11.12790	ribonucleoside-diphosphate reductase small chain	1.011	0.752	15.7791	2119	3619	3461	79.0663	0.721835	2.37997	4.23462	16394	5071.66
Tb927.11.12840	Domain of unknown function (DUF4486), putative	11.889	0.716	0.504541	5540	9814	10455	18.7452	0.612559	0.564248	0.961917	262.426	84.7317
Tb927.11.12850	oligopeptidase b	2.145	0.754	15.8287	5943	9721	10463	105.873	0.710063	3.18689	3.60967	10501	5103.1
Tb927.11.1290	hypothetical protein, conserved	1.194	0.691	3.34169	1698	2888	2776	53.6135	0.658219	1.61382	1.78686	1476.77	734.148
Tb927.11.12940	Uncharacterised protein family (UPF0160), putative	1.182	0.741	4.21941	3324	5522	5828	107.717	0.708384	3.24239	3.52843	9854.78	4984.68
Tb927.11.12970	hypothetical protein, conserved	1.335	0.67	4.4843	1531	2701	2791	45.4218	0.635337	1.36724	1.31012	621.318	356.906
Tb927.11.13020	calmodulin	0.447	0.798	42.2222	10741	16617	17677	876.812	0.777943	26.3929	9.06367	136981	219558
Tb927.11.13060	translation-associated element 2, putative	3.3	0.726	1.81653	3498	6174	6334	41.9471	0.671502	1.26265	2.13961	2441.13	792.95
Tb927.11.13130	membrane-bound acid phosphatase 1 precursor	1.572	0.717	3.80952	4760	7702	8231	114.532	0.679386	3.44753	2.38108	3289.59	2621.7
Tb927.11.13180	Present in the outer mitochondrial membrane proteome 10	1.68	0.72	14.2602	5157	8130	8770	114.509	0.681116	3.44683	2.43759	3512.05	2733.54
Tb927.11.13190	elongation factor 1 gamma, putative	1.596	0.797	32.0988	19119	29827	32211	584.235	0.7591	17.5861	7.01966	67148.1	92596.2
Tb927.11.13220	phospholipid:diacylglycerol acyltransferase-like protein	1.917	0.708	2.08333	2308	4121	3923	46.782	0.666463	1.40819	1.99827	2017.38	782.53
Tb927.11.13230	MSP (Major sperm protein) domain containing protein, putative	0.648	0.768	23.0415	3033	4945	5289	177.505	0.74385	5.34306	5.70808	37709	19429.1
Tb927.11.13250	eukaryotic translation initiation factor 2 gamma, putative	1.431	0.788	11.855	7313	11627	12171	189.679	0.752113	5.70952	6.38495	51548.2	25372.4
Tb927.11.13270	hypothetical protein, conserved	0.81	0.665	9.8401	2017	3326	3687	96.4517	0.638	2.90329	1.3583	687.176	808.481
Tb927.11.13280	mitochondrial RNA binding protein 2	0.672	0.7	20.7407	4103	6687	6927	228.994	0.675407	6.89294	2.25599	2829.83	4759.2
Tb927.11.1330	Stress responsive A/B Barrel Domain, putative	0.333	0.742	14.881	1768	2796	3095	198.831	0.724688	5.985	4.40167	18262.6	13668.3
Tb927.11.13300	Intraflagellar transport protein 25 homolog, putative	0.468	0.691	10.6157	987	1689	1584	78.8848	0.670477	2.37451	2.11006	2348.23	1454.54
Tb927.11.13360	AAA ATPase, putative	3.843	0.721	4.68019	5817	10293	10456	59.8052	0.662189	1.80019	1.88573	1716.15	901.787
Tb927.11.13400	Bromodomain, putative	1.98	0.711	5.04286	3898	6185	6518	73.183	0.668786	2.20288	2.06223	2202.72	1295.15
Tb927.11.13470	PPPDE putative peptidase domain containing protein, putative	0.708	0.708	7.03235	1827	3070	3150	98.4707	0.682757	2.96406	2.49247	3737.11	2446.25
Tb927.11.13500	par1	1.776	0.774	26.4193	14240	22321	24788	301.035	0.73402	9.06146	4.99558	25996	25955.3
Tb927.11.13510	hypothetical protein, conserved	0.54	0.724	7.36648	524	784	809	34.337	0.701955	1.03358	3.23377	7726.73	1359.37
Tb927.11.13520	hypothetical protein, conserved	2.847	0.701	7.36842	10782	17278	18408	142.301	0.650381	4.28339	1.60666	1097.78	1610.97
Tb927.11.13570	hypothetical protein, conserved	0.39	0.742	12.7226	1903	2908	2865	172.034	0.723265	5.17838	4.31753	17305.2	11424.6
Tb927.11.13670	hypothetical protein, conserved	4.872	0.71	1.64103	6650	10837	11015	51.0571	0.643782	1.53687	1.46911	855.23	492.462
Tb927.11.1370	glutaredoxin, putative	0.285	0.72	27.7778	1664	2556	2659	209.672	0.703984	6.31134	3.32404	8343.53	8719.92
Tb927.11.13700	Basal body protein	2.262	0.693	2.20751	2450	4042	4200	41.1244	0.64788	1.23789	1.55308	998.672	438.144
Tb927.11.13780	profilin	0.45	0.75	15.4525	4362	6677	7414	356.499	0.729875	10.731	4.7225	22222.9	27795.5
Tb927.11.13870	uncharacterized protein, PH0010 family/AmmeMemoRadiSam system protein A, putative	0.567	0.756	12.2807	1153	2007	1946	77.8641	0.73341	2.34379	4.95443	25403.1	6614.81
Tb927.11.13920	kinesin-II 85 Kd subunit, putative	3.345	0.749	8.25688	5036	8543	8508	57.4244	0.694132	1.72853	2.90825	5747.13	1880.2
Tb927.11.13970	Pab1p-dependent poly(A) ribonuclease subunit, putative	1.536	0.705	2.59909	2919	4908	4947	72.2743	0.667819	2.17553	2.03536	2123.59	1249.4
Tb927.11.14090	Double RNA binding domain protein 18	1.44	0.713	12.474	6913	11961	12721	189.586	0.677	5.70673	2.30525	3005.6	4095.5
Tb927.11.14100	Double RNA-binding domain containing protein 4	1.515	0.729	8.5639	4085	6844	7227	103.945	0.692074	3.12886	2.82821	5316.68	3237.59
Tb927.11.14120	phenylalanyl-tRNA synthetase alpha chain, putative	1.488	0.727	12.0724	4727	7793	7945	119.699	0.690405	3.60304	2.76489	4991.22	3580.18
Tb927.11.14130	ribosomal protein L18, putative	0.537	0.79	27.7778	18469	28674	30530	1259.68	0.768016	37.9175	7.92196	94089.6	247888
Tb927.11.14140	ethanolamine-phosphate cytidylyltransferase	1.152	0.714	10.3896	3246	5245	5477	105.563	0.681801	3.17754	2.46034	3604.27	2562.24
Tb927.11.14170	hypothetical protein, conserved	1.854	0.698	4.84653	1802	2990	3200	37.4152	0.657151	1.12623	1.76118	1418.32	499.234
Tb927.11.14190	Staphylococcal nuclease homologue/Tudor domain containing protein, putative	2.772	0.732	14.4144	8631	14262	14408	117.247	0.682052	3.52926	2.46875	3638.72	2863.27
Tb927.11.1420	hypothetical protein, conserved	2.58	0.708	9.29152	1450	2477	2707	22.2377	0.659813	0.669378	1.82591	1568.58	316.522
Tb927.11.14200	ubiquitin-conjugating enzyme E2, putative	0.741	0.743	9.4086	2401	4046	3950	121.845	0.717176	3.66765	3.97527	13744	6979.78
Tb927.11.14210	conserved protein	4.512	0.701	2.05903	3560	5664	5613	29.7572	0.637276	0.895722	1.34502	668.597	245.085
Tb927.11.14220	hypothetical protein, conserved	1.548	0.698	5.80271	342	600	554	8.39652	0.660674	0.252743	1.84738	1620.55	122.038
Tb927.11.14230	Vps23 core domain containing protein, putative	1.362	0.716	3.663	1214	2057	2067	34.0294	0.680989	1.02432	2.43339	3495.21	809.847
Tb927.11.14250	T-complex protein 1, epsilon subunit, putative	1.614	0.771	24.7372	12689	20319	21603	294.814	0.732887	8.87419	4.9194	24905.2	24729.4
Tb927.11.14280	septum formation protein MAF homologue, putative	0.609	0.738	6.53595	873	1440	1339	52.2727	0.714588	1.57346	3.8382	12462.4	2812.13
Tb927.11.14290	vacuolar sorting protein, putative	0.678	0.718	7.34214	1471	2663	2587	85.4298	0.693298	2.57152	2.87553	5568.56	2741.08
Tb927.11.1430	Component of motile flagella 2	2.256	0.745	23.019	8555	13686	15076	143.953	0.69994	4.33314	3.14661	7159.65	5426.98
Tb927.11.14300	Dynein intermediate chain, axonemal	1.806	0.748	13.8198	8763	13889	14559	179.888	0.707684	5.41479	3.49507	9597.08	8184.12
Tb927.11.14330	HECT-domain (ubiquitin-transferase), putative	4.827	0.726	6.8323	7232	12472	12563	58.0185	0.660089	1.74641	1.83276	1585.03	831.356
Tb927.11.14340	exportin 1	3.099	0.711	2.25661	3360	5950	5782	42.2097	0.658188	1.27055	1.78612	1475.05	577.558
Tb927.11.14360	mitochondrial carrier protein	1.017	0.697	5.88235	2034	3457	3446	76.2484	0.666746	2.29515	2.00595	2039.08	1284.2
Tb927.11.14380	kinetoplast polyadenylation/uridylation factor 2	1.929	0.69	3.10559	1775	3322	3237	37.2078	0.648333	1.11999	1.56265	1015.95	400.802
Tb927.11.14430	proteasome regulatory non-ATP-ase subunit	0.822	0.758	10.9091	2510	4035	4382	115.444	0.730801	3.47499	4.78215	23014.8	9205.44
Tb927.11.14460	ADP-ribosylation factor GTPase activating protein 1, putative	0.921	0.695	6.49351	1900	3132	3168	77.4234	0.666209	2.33052	1.9914	1998.09	1287.12
Tb927.11.14490	RNA polymerase subunit, putative	0.57	0.681	6.9808	1026	1808	1823	70.4228	0.65835	2.1198	1.79006	1484.14	967.408
Tb927.11.1450	2-oxoglutarate dehydrogenase E1 component, putative	3.024	0.737	20.8127	11025	19294	19409	142.466	0.684831	4.28835	2.56358	4042.17	3721.91
Tb927.11.14560	Cleavage and polyadenylation specificity factor CPSF160, putative	4.356	0.712	3.44116	3982	6906	7155	35.878	0.649387	1.07996	1.58514	1057.26	396.487
Tb927.11.14590	G5-interacting protein	1.887	0.709	6.87831	4609	7487	7943	92.4229	0.66779	2.78202	2.03454	2121.2	1596.55
Tb927.11.14730	Metalloprotease M41 FtsH, putative	2.031	0.712	9.3412	3198	5178	5665	60.1009	0.669246	1.8091	2.07513	2241.38	1075.57
Tb927.11.14750	PSP1 C-terminal conserved region, putative	1.116	0.756	3.57462	1247	2219	2597	46.5621	0.724308	1.40156	4.37902	18001.6	3171.42
Tb927.11.14780	phosphomannose isomerase	1.227	0.685	15.4472	1948	3460	3347	61.747	0.651769	1.85864	1.63719	1156.98	722.985
Tb927.11.14870	NAD+ synthase, putative	0.882	0.729	4.51977	989	1628	1791	43.2771	0.700826	1.30268	3.18463	7403.59	1666.98
Tb927.11.14880	Paraflagellar Rod Proteome Component 9, putative	1.113	0.766	14.3369	7395	11916	12928	251.743	0.73435	7.57772	5.01801	26323	21880.1
Tb927.11.14900	coatomer subunit epsilon	0.972	0.707	13.3333	3098	4986	5374	120.342	0.677423	3.62241	2.31852	3054.09	2626.5
Tb927.11.14910	protein phosphatase 2C, putative	1.287	0.69	5.42636	1741	3282	3149	54.6407	0.655966	1.64474	1.73309	1356.11	708.398
Tb927.11.14950	zinc finger protein 2	0.417	0.751	11.9048	5557	8691	9334	491.108	0.731627	14.7828	4.83606	23746	39954.2
Tb927.11.14960	pumilio/PUF RNA binding protein 7, putative	2.112	0.69	8.03783	1472	2398	2541	26.4165	0.646402	0.795164	1.52225	944.344	271.524
Tb927.11.14970	hypothetical protein, conserved	2.469	0.696	7.68608	4718	7910	7805	72.0718	0.648861	2.16943	1.57387	1036.42	786.36
Tb927.11.14980	mitochondrial ribosomal protein L38	1.521	0.696	2.62467	1692	2828	2822	41.9965	0.659001	1.26414	1.80593	1521.15	586.099
Tb927.11.15020	iron superoxide dismutase	0.624	0.757	6.37959	1992	3221	3581	122.027	0.733302	3.67313	4.94716	25299.2	10339.4
Tb927.11.15040	Chaperonin HSP60, mitochondrial	1.782	0.731	13.4454	2464	4447	4545	55.4386	0.690953	1.66876	2.7855	5095.72	1680.35
Tb927.11.15070	Basal body protein	3.228	0.693	1.54751	2357	4309	4023	28.6607	0.6391	0.862714	1.37872	716.383	246.742
Tb927.11.15100	Tb5.20	3.516	0.724	5.84256	16978	26741	29802	197.217	0.667747	5.93644	2.03336	2117.79	3403.3
Tb927.11.15120	hypothetical protein, conserved	2.169	0.699	3.22284	2227	4150	3830	40.6535	0.654817	1.22371	1.7063	1298.43	512.564
Tb927.11.15130	DnaJ homolog, putative	0.957	0.739	16.6667	2982	4894	5244	118.943	0.709652	3.5803	3.58964	10339.1	5676.23
Tb927.11.15140	bilobe region protein, putative	1.704	0.714	11.7165	4933	7822	8525	108.797	0.674839	3.27489	2.23866	2769.61	2230.15
Tb927.11.15150	1-acyl-sn-glycerol-3-phosphate acyltransferase, putative	0.813	0.722	11.0294	3475	5479	5735	157.524	0.69495	4.74162	2.9407	5927.81	5261.11
Tb927.11.15180	hypothetical protein, conserved	0.333	0.688	14.881	1494	2537	2464	168.449	0.670688	5.07048	2.11612	2367.08	3121.97
Tb927.11.15190	Domain of unknown function (DUF4200), putative	2.046	0.725	5.36847	3615	5952	5808	65.5889	0.682088	1.97429	2.46997	3643.74	1603.15
Tb927.11.15220	hypothetical protein, conserved	0.903	0.743	5.51876	2227	3699	3672	92.4349	0.714492	2.78238	3.83318	12417	4961.13
Tb927.11.15230	cytosolic coat protein, putative	0.684	0.699	8.73362	2305	3742	4084	128.37	0.674189	3.86405	2.21901	2702.31	2590.16
Tb927.11.15240	Ras-related protein RAB2B, putative	0.636	0.727	17.2144	1174	2000	2049	71.0182	0.703075	2.13772	3.28329	8061.36	2889.06
Tb927.11.15270	hypothetical protein, conserved	0.804	0.692	7.43494	1211	2124	1985	57.3565	0.6651	1.72649	1.96166	1915.97	928.185
Tb927.11.15370	Importin subunit beta-4, putative	3.216	0.736	15.8434	5525	9317	10053	67.0944	0.6822	2.01961	2.47372	3659.2	1644.41
Tb927.11.1540	isovaleryl-coA dehydrogenase, putative	1.233	0.744	8.09061	2276	3988	3824	70.933	0.710688	2.13515	3.64042	10752.4	3471.27
Tb927.11.15420	eukaryotic translation initiation factor 3 subunit k	0.615	0.783	17.7994	1527	2469	2591	93.0076	0.759473	2.79962	7.05529	68103.3	14875.1
Tb927.11.15430	U5 small nuclear ribonucleoprotein component, putative	2.922	0.704	4.10256	2603	4178	4409	33.3994	0.652718	1.00536	1.65841	1199.3	400.186
Tb927.11.15450	Basal body protein	6.879	0.641	0.581226	4464	7091	8090	24.8486	0.562316	0.747967	0.486624	39.2108	33.1742
Tb927.11.15480	heat shock protein Hsp20, putative	0.624	0.753	20.7337	1820	2636	3057	105.248	0.729302	3.16808	4.68591	21745.9	8092.56
Tb927.11.15490	Tb-291 membrane associated protein, putative	2.154	0.655	1.85443	1507	2775	2715	28.021	0.61097	0.843459	0.941418	247.12	121.87
Tb927.11.15550	NADH-cytochrome b5 reductase, putative	0.924	0.736	10.7875	494	825	809	20.0302	0.707163	0.602929	3.47045	9409.67	899.832
Tb927.11.1560	1,2-Dihydroxy-3-keto-5-methylthiopentene dioxygenase, putative	0.993	0.746	21.0843	2289	3743	4108	88.5303	0.716105	2.66485	3.91797	13198.5	4941.31
Tb927.11.15640	mitochondrial RNA binding complex 1 subunit	1.185	0.716	5.05051	1094	2057	1958	37.1167	0.683343	1.11725	2.51234	3820.83	935.265
Tb927.11.15680	hypothetical protein, conserved	0.387	0.737	20.5128	1459	2292	2367	137.423	0.718337	4.13657	4.03839	14361.5	8097.29
Tb927.11.15750	AMP deaminase, putative	4.251	0.717	1.64551	3822	6594	6564	34.6837	0.655146	1.04401	1.71393	1314.68	440.8
Tb927.11.15760	GPI transamidase subunit Tta1	1.131	0.753	5.29101	2795	4398	4772	92.1791	0.721095	2.77468	4.19233	15941.4	5807.51
Tb927.11.15800	Tip Of Extending FAZ protein 1	2.379	0.726	4.61797	3960	6104	6624	61.3411	0.679728	1.84643	2.39214	3332.41	1415.83
Tb927.11.15850	kinteoplast poly(A) polymerase complex 1 subunit	2.262	0.71	3.09051	4828	8296	8124	81.6138	0.66488	2.45666	1.95582	1900.09	1313.7
Tb927.11.15870	hypothetical protein, conserved	1.152	0.715	7.79221	3840	6734	6854	130.752	0.682801	3.93577	2.49394	3743.26	3251.62
Tb927.11.15880	60S ribosomal protein L27, putative	0.399	0.81	29.8507	12848	20959	20918	1189.77	0.79105	35.8133	10.8271	224930	409531
Tb927.11.15940	hypothetical protein, conserved	2.88	0.725	3.46861	2630	4929	4683	36.6639	0.674088	1.10362	2.21599	2692.07	737.979
Tb927.11.15970	Guanine nucleotide exchange factor in Golgi transport N-terminal/Sec7 domain containing protein, putative	3.138	0.721	3.1837	4544	8149	8122	57.3491	0.667857	1.72626	2.03639	2126.61	992.29
Tb927.11.15990	Nucleoporin NUP109	3.003	0.723	4.65735	3822	6566	6691	49.3352	0.671013	1.48504	2.12545	2396.31	921.589
Tb927.11.16030	proteasome regulatory non-ATP-ase subunit 7	1.197	0.747	10.8333	3412	5916	6122	111.606	0.714178	3.35947	3.81688	12270.2	5944.57
Tb927.11.16090	outer dynein arm docking complex, putative	1.902	0.715	9.44882	4228	6922	7087	83.5299	0.673626	2.51433	2.20214	2645.39	1662.55
Tb927.11.16100	ubiquitin carboxyl-terminal hydrolase, putative	3.552	0.696	1.68776	3670	6561	6480	40.7107	0.63946	1.22543	1.38546	726.198	353.555
Tb927.11.16110	integrin alpha chain protein, putative	2.109	0.705	2.36742	5959	10095	10730	110.051	0.661433	3.31266	1.86648	1667.73	1629.24
Tb927.11.16130	nucleoside diphosphate kinase	0.459	0.8	21.645	17228	26024	26944	1336.53	0.779675	40.2309	9.27918	146262	349050
Tb927.11.16150	tubulin binding cofactor A, putative	0.384	0.652	15.5039	2088	3375	3434	200.93	0.63341	6.04818	1.27631	577.614	1506.65
Tb927.11.1620	hypothetical protein, conserved	0.576	0.773	13.8169	1264	2257	2344	87.5278	0.750232	2.63467	6.22411	48006.8	11185.6
Tb927.11.16200	cytoskeleton-associated protein 17	0.396	0.72	10.0251	1387	2132	2067	123.331	0.701121	3.71239	3.19744	7486.95	4784.79
Tb927.11.16220	Cytochrome b-c1 complex subunit, putative	0.561	0.74	7.0922	527	809	885	34.48	0.71753	1.03788	3.99442	13929.6	1992.22
Tb927.11.16230	hypothetical protein, conserved	2.919	0.713	1.36893	3182	5922	5903	44.2782	0.661745	1.33282	1.87439	1687.53	660.494
Tb927.11.16280	60S ribosomal protein L8, putative	0.78	0.825	20.4342	11555	18099	19445	548.376	0.798505	16.5067	11.979	298226	226199
Tb927.11.16340	Importin-beta N-terminal domain/HEAT-like repeat, putative	3.447	0.741	1.15942	4730	8596	8481	54.6527	0.685302	1.6451	2.57999	4114.8	1444.21
Tb927.11.16400	kinetoplast-associated protein 3, putative	0.972	0.746	8.20513	4105	6404	6903	156.216	0.716423	4.70225	3.9349	13358.1	8786.68
Tb927.11.16410	enolase, putative	1.521	0.725	3.28084	2273	3811	3822	56.63	0.688001	1.70462	2.67621	4557.33	1597.81
Tb927.11.16480	enoyl-CoA hydratase/isomerase family protein, putative	1.086	0.744	19.2837	996	1654	1714	34.8919	0.712737	1.05028	3.74299	11619	1794.58
Tb927.11.16510	hypothetical protein, conserved	0.438	0.785	9.07029	1710	2864	2996	149.256	0.765146	4.49276	7.61948	84406.2	27394.8
Tb927.11.16550	Zinc finger protein, C3H1 type-like	1.53	0.728	12.394	269	440	455	6.62246	0.690892	0.199343	2.78322	5084.07	200.434
Tb927.11.1660	vesicular transport protein (CDC48 homologue), putative	2.118	0.734	3.51936	2048	3709	3772	41.3789	0.69034	1.24555	2.76246	4978.96	1235.69
Tb927.11.16610	zinc-finger of a C2HC-type, putative	1.848	0.694	5.40249	2359	3769	3773	46.847	0.653218	1.41014	1.66968	1222.17	568.156
Tb927.11.16630	major facilitator superfamily, putative	2.049	0.72	1.94932	3849	6522	6460	71.4242	0.677057	2.14994	2.30704	3012.09	1545.07
Tb927.11.16660	Dopey, N-terminal, putative	6.405	0.719	1.40449	4105	8006	7583	26.4337	0.643076	0.79568	1.4551	832.672	250.626
Tb927.11.16670	hypothetical protein, conserved	1.71	0.739	4.0864	2936	4811	4845	64.1857	0.69977	1.93205	3.13936	7113.71	2409.8
Tb927.11.1670	cysteine desulfurase	1.311	0.722	6.84932	1208	2067	1980	34.8454	0.68765	1.04888	2.6635	4497.2	974.815
Tb927.11.16730	dihydrolipoyl dehydrogenase	1.431	0.805	23.7099	7078	11661	11874	186.195	0.769113	5.60467	8.04069	98076.3	37629.4
Tb927.11.16750	hypothetical protein, conserved	0.702	0.685	7.0922	1670	2833	2736	89.5124	0.659864	2.69441	1.82719	1571.64	1275.67
Tb927.11.16760	T-complex protein 1, alpha subunit, putative	1.515	0.79	18.686	11751	18351	19587	286.446	0.753074	8.62231	6.46878	53458.5	39221.6
Tb927.11.16770	glucosamine-6-phosphate isomerase, putative	0.84	0.727	16.6074	1483	2505	2509	67.0973	0.699505	2.0197	3.12808	7042.64	2502.94
Tb927.11.1680	vesicular-fusion protein SEC18, putative	2.664	0.713	2.24972	3430	6574	6610	53.5273	0.664035	1.61122	1.93352	1840.27	844.102
Tb927.11.16810	dynein light intermediate chain D1bLIC, putative	1.254	0.744	8.75099	2524	4387	4648	79.6009	0.710405	2.39606	3.6265	10638	3868.83
Tb927.11.16830	Rab-like 5, small G protein	0.657	0.74	19.697	2166	3625	3668	124.832	0.715683	3.75758	3.89562	12989.5	6896.52
Tb927.11.16870	NADH-ubiquinone oxidoreductase B8 subunit	0.495	0.73	8.03213	1842	3042	3220	141.621	0.708893	4.26295	3.55287	10046.4	6635.13
Tb927.11.16890	Tetratricopeptide-like helical domain containing protein	6.177	0.706	2.10356	8508	14337	15124	53.3651	0.631439	1.60634	1.24266	536.117	381.465
Tb927.11.1690	Emopamil binding protein, putative	0.549	0.698	12.3457	1127	1955	1916	78.6904	0.675772	2.36866	2.26716	2869.11	1649.96
Tb927.11.16970	protein phosphatase 4, putative	0.909	0.725	17.5439	2272	3867	3988	96.4577	0.696398	2.90347	2.999	6261.52	3336.78
Tb927.11.1700	hypothetical protein, conserved	1.71	0.743	5.83771	3889	6563	6734	87.2498	0.70377	2.62631	3.31438	8276.1	3609.73
Tb927.11.1710	guide RNA-binding protein of 21 kDa	0.618	0.725	19.3237	4647	7468	7775	279.782	0.701416	8.42171	3.21024	7570.89	10932.4
Tb927.11.1740	intraflagellar transport protein 88	2.4	0.739	16.2297	4553	7704	7889	72.896	0.692524	2.19424	2.84552	5407.94	2295.42
Tb927.11.1820	translation initiation factor eIF2B delta subunit, putative	1.884	0.736	5.29942	1626	2961	2954	34.5283	0.694822	1.03933	2.93561	5899.23	1149.63
Tb927.11.1830	hypothetical protein, conserved	1.71	0.721	4.0864	844	1500	1546	19.6388	0.68177	0.591149	2.45932	3600.08	476.323
Tb927.11.1840	hypothetical protein, conserved	1.197	0.769	20	3833	6007	6775	120.771	0.736178	3.63532	5.14393	28207.5	10972.8
Tb927.11.18680	dynein light chain LC8, putative	0.27	0.761	25.641	4123	6585	6931	564.46	0.745412	16.9908	5.83023	40003.5	64170.1
Tb927.11.1890	Serine-threonine kinase receptor-associated protein, putative	0.978	0.732	19.368	4547	7233	7916	175.124	0.702332	5.27142	3.25036	7837.81	6996.76
Tb927.11.190	elongation factor, putative	1.959	0.703	7.20165	2814	5199	5005	57.3384	0.661011	1.72594	1.85582	1641.31	840.207
Tb927.11.1900	T-complex protein 1, beta subunit, putative	1.587	0.751	27.673	13842	21939	23616	326.245	0.713207	9.82029	3.76696	11827.7	16972.4
Tb927.11.1980	zinc finger protein family member, putative	1.551	0.76	18.018	12291	19935	21419	300.77	0.722638	9.05347	4.28098	16899.6	19672.4
Tb927.11.1990	arginyl-tRNA synthetase, putative	2.076	0.759	18.759	4850	7850	8797	89.9162	0.715775	2.70657	3.90046	13034.6	4978.6
Tb927.11.2060	60S acidic ribosomal protein P0, putative	0.972	0.863	26.6667	27362	42803	45123	1035.22	0.833423	31.1611	19.2355	1.11773e+06	996677
Tb927.11.2090	choline kinase	1.293	0.727	3.85802	2523	4272	4125	73.4686	0.692887	2.21148	2.85955	5482.67	2333.91
Tb927.11.2110	Snf7, putative	0.642	0.707	7.75194	2102	3480	3420	121.879	0.682963	3.66868	2.49942	3766.26	3042.9
Tb927.11.2120	CBF/Mak21 family, putative	2.364	0.73	3.80228	2164	3813	3906	36.1514	0.683874	1.08819	2.53052	3898.43	922.769
Tb927.11.2130	proteasome regulatory non-ATP-ase subunit 3	1.002	0.764	17.9104	3140	5357	5416	120.343	0.73397	3.62245	4.99219	25946.9	10363.4
Tb927.11.2140	cyclic nucleotide-binding domain containing protein, putative	3.339	0.715	1.49611	4563	7879	7703	52.4187	0.660181	1.57785	1.83506	1590.59	752.804
Tb927.11.2200	DNA-directed RNA polymerase II, putative	0.396	0.764	15.0376	954	1502	1480	86.6022	0.745121	2.60681	5.80733	39566.8	9776.2
Tb927.11.2230	carnitine O-acetyltransferase, putative	2.304	0.704	11.2918	5730	9356	9915	98.3859	0.658463	2.96151	1.79279	1490.48	1355.24
Tb927.11.2250	conserved protein, unknown function	0.723	0.707	12.3967	2739	4343	4662	141.286	0.681491	4.25284	2.45004	3562.32	3403.66
Tb927.11.2260	Eukaryotic translation initiation factor 4E-1	0.699	0.739	9.97151	1504	2438	2621	81.4581	0.713918	2.45197	3.80346	12150.2	4311.5
Tb927.11.2270	inner dynein arm I1 intermediate chain, axonemal	2.427	0.723	5.76132	3481	5859	6112	55.27	0.676264	1.66368	2.28234	2923	1172.81
Tb927.11.2280	BRO1-like domain/ALIX V-shaped domain binding to HIV, putative	2.586	0.71	1.93125	4110	7410	7160	62.4972	0.661757	1.88123	1.8747	1688.3	932.539
Tb927.11.230	cleavage and polyadenylation specificity factor subunit 2	2.454	0.702	2.849	4041	6962	6924	63.412	0.655004	1.90876	1.71063	1307.64	803.14
Tb927.11.2300	eukaryotic peptide chain release factor subunit 1, putative	1.356	0.764	17.66	4565	7114	7626	124.31	0.729066	3.74185	4.67093	21552.5	9503.58
Tb927.11.2320	Hereditary spastic paraplegia protein strumpellin, putative	3.651	0.726	1.09469	4364	7665	7823	47.0642	0.668677	1.41668	2.05918	2193.66	830.715
Tb927.11.2360	phenylalanyl-tRNA synthetase (beta subunit), putative	1.872	0.747	16	4811	8182	8721	100.442	0.705954	3.02342	3.41402	8988.97	4381.77
Tb927.11.2370	mRNA export factor MEX67	1.551	0.713	4.62963	3728	6039	6341	81.324	0.675638	2.44793	2.26307	2854.66	1699.67
Tb927.11.2380	phosphoglycerate kinase, putative	2.739	0.721	2.91758	2435	4205	4463	35.0717	0.67135	1.05569	2.1352	2427.13	660.538
Tb927.11.2400	Flabarin-like protein	0.654	0.718	10.6545	2201	3325	3751	123.646	0.693739	3.72188	2.89279	5662.29	4010.01
Tb927.11.2410	hypothetical protein, conserved	0.666	0.752	22.4215	876	1502	1477	50.1329	0.727517	1.50905	4.57386	20326.1	3691.31
Tb927.11.2420	Tubulin-tyrosine ligase family, putative	1.938	0.72	4.63679	2808	4764	4842	55.6152	0.678236	1.67407	2.34424	3149.55	1238.02
Tb927.11.2430	Cytoplasmic dynein 2 heavy chain (DYNC2H2), putative	12.921	0.753	8.66605	17426	30084	33158	53.9625	0.645163	1.62432	1.49688	901.088	538.221
Tb927.11.2470	metallo-peptidase, Clan MF, Family M17	1.695	0.735	14.7232	3510	5802	6173	79.3375	0.695942	2.38814	2.98054	6154.6	2714.38
Tb927.11.2490	Unc104-like kinesin, putative	4.716	0.714	1.90718	4986	8087	8748	40.2745	0.648851	1.2123	1.57366	1036.04	439.321
Tb927.11.250	ubiquitin carboxyl-terminal hydrolase, putative	0.708	0.729	5.62588	1108	1867	2129	62.1101	0.703757	1.86958	3.31381	8272.11	2568.85
Tb927.11.2500	Metallocarboxypeptidase 1	1.509	0.751	17.8571	4617	7724	8258	118.345	0.714148	3.56229	3.81531	12256.2	6298.85
Tb927.11.2510	NUC173 domain containing protein, putative	3.876	0.715	3.09358	2340	4099	3994	23.3578	0.655937	0.703092	1.73242	1354.63	302.613
Tb927.11.2520	UDP-n-acetylglucosamine pyrophosphorylase	1.635	0.737	7.93651	2607	4288	4629	61.193	0.69864	1.84197	3.09161	6815.95	2235.28
Tb927.11.2530	Mitochondrial SSU ribosomal protein, putative	2.241	0.713	4.90196	2544	4657	4462	44.967	0.66809	1.35355	2.04285	2145.46	782.466
Tb927.11.2540	hypothetical protein, conserved	0.891	0.705	15.66	3279	5472	5556	139.41	0.676682	4.19638	2.29534	2969.67	2988.44
Tb927.11.2570	hypothetical protein, conserved	1.719	0.692	11.6144	3735	5974	6136	80.4736	0.652667	2.42233	1.65725	1196.96	963.013
Tb927.11.2580	Present in the outer mitochondrial membrane proteome 11	1.155	0.696	3.45423	1034	1887	1855	35.6516	0.663759	1.07315	1.9263	1821.15	558.456
Tb927.11.260	Putative intraflagellar transport protein F6	4.068	0.711	11.2994	6099	10424	10738	58.147	0.650492	1.75028	1.60908	1102.41	660.056
Tb927.11.2610	hypothetical protein, conserved	1.383	0.741	29.5815	25343	39567	42324	676.997	0.70572	20.3783	3.4032	8909.74	29366.5
Tb927.11.2620	hypothetical protein, conserved	1.863	0.706	3.21543	1871	3606	3279	40.4809	0.665052	1.21851	1.9604	1912.52	654.333
Tb927.11.2650	heat shock protein 84, putative	2.259	0.786	25.641	16092	25424	27647	266.979	0.74091	8.03633	5.48492	33738.7	27209.6
Tb927.11.2670	Nucleoporin NUP59	1.635	0.734	12.21	2668	4427	4476	61.5877	0.69564	1.85385	2.96834	6084.56	2091.69
Tb927.11.2690	succinyl-coA:3-ketoacid-coenzyme A transferase, mitochondrial precursor, putative	1.479	0.74	12.1457	2499	4077	4520	65.0897	0.703516	1.95926	3.30297	8196.89	2676.35
Tb927.11.2730	UDP-galactose 4-epimerase	1.185	0.728	7.57576	2926	4755	4639	90.775	0.695343	2.73242	2.9564	6016.53	3060.81
Tb927.11.2740	hypothetical protein, conserved	2.514	0.698	1.58919	3618	6026	5922	53.9716	0.650433	1.6246	1.6078	1099.96	611.783
Tb927.11.2750	Present in the outer mitochondrial membrane proteome 12	1.419	0.729	11.2518	3266	5298	5559	86.6362	0.693263	2.60784	2.87419	5561.34	2777.48
Tb927.11.2770	hypothetical protein, conserved	0.81	0.704	4.92005	1680	2710	2944	78.5981	0.677	2.36588	2.30525	3005.6	1697.9
Tb927.11.2790	Solute carrier (proton/amino acid symporter), TRAMD3 or PAT1, putative	2.127	0.715	4.22535	3714	5788	6167	64.395	0.671247	1.93835	2.13223	2417.69	1209.78
Tb927.11.280	hypothetical protein, conserved	1.944	0.715	2.56805	1689	2790	2852	32.8249	0.673172	0.988063	2.18861	2600.31	646.17
Tb927.11.2860	hypothetical protein, conserved	2.307	0.71	3.8961	266	492	533	4.80237	0.664434	0.144556	1.94401	1868.25	76.4681
Tb927.11.2950	Nucleoporin NUP89	2.388	0.734	7.52823	2537	4639	4943	43.6383	0.687641	1.31356	2.66315	4495.53	1220.51
Tb927.11.3030	phosphoribosylpyrophosphate synthetase, putative	1.323	0.77	14.9393	4372	6914	7193	150.983	0.735493	4.54475	5.09642	27486.5	13491.9
Tb927.11.3070	ribosome assembly protein RRB1, putative	1.728	0.745	4.62161	3065	5162	5464	68.692	0.705564	2.0677	3.39602	8857.4	2968.45
Tb927.11.3100	Present in the outer mitochondrial membrane proteome 13	1.086	0.706	3.67309	836	1405	1521	29.9755	0.674737	0.902293	2.23556	2758.92	612.924
Tb927.11.3120	nucleolar GTP-binding protein 1	1.965	0.747	4.06504	3169	5115	5389	60.6249	0.704946	1.82487	3.36769	8652.85	2580.87
Tb927.11.3130	glycosomal transporter (GAT2)	1.923	0.709	2.07684	1958	3459	3711	40.9322	0.667398	1.2321	2.02377	2090.03	700.397
Tb927.11.320	dynein light chain 1, putative	0.27	0.773	18.315	1118	1828	1977	156.931	0.757412	4.72379	6.86072	62992.1	23873.4
Tb927.11.3220	metacaspase	1.116	0.748	8.93655	2814	4454	5067	96.0067	0.716308	2.8899	3.92875	13300	5385.02
Tb927.11.3230	60S ribosomal protein L44	0.318	0.865	34.2679	19651	31451	32190	2269.55	0.848083	68.3158	23.4667	1.94638e+06	3.11892e+06
Tb927.11.3240	T-complex protein 1, zeta subunit, putative	1.632	0.737	20.7951	14672	23803	25020	338.727	0.698675	10.196	3.09309	6825.04	12383.7
Tb927.11.3250	dynein heavy chain, putative	13.974	0.754	14.7385	33101	53907	63948	93.5824	0.641855	2.81692	1.4312	795.074	861.369
Tb927.11.3260	mitochondrial DNA polymerase I protein D, putative	4.887	0.735	0.817996	7588	12518	13113	59.1579	0.66868	1.78071	2.05927	2193.91	1044.26
Tb927.11.3270	squalene monooxygenase, putative	1.737	0.718	4.5977	1653	3372	3128	40.1587	0.678461	1.20882	2.3514	3176.48	898.848
Tb927.11.3280	Kinesin-13 5, putative	2.157	0.73	6.48148	4483	7646	7776	80.0872	0.68594	2.4107	2.60242	4215.36	2149.35
Tb927.11.3290	hypothetical protein, conserved	4.503	0.722	0.887705	4522	8215	8030	39.8679	0.658339	1.20006	1.78978	1483.51	547.521
Tb927.11.330	Myosin-like protein 1	2.952	0.709	2.36887	3210	5749	5735	43.037	0.657456	1.29546	1.76847	1434.74	578.504
Tb927.11.3300	Spindle assembly abnormal 4	2.796	0.725	7.14541	3028	5096	5257	41.5759	0.674836	1.25148	2.23858	2769.34	852.182
Tb927.11.3310	ubiquitin-conjugating enzyme, putative	0.414	0.722	16.7866	4549	6874	7688	401.489	0.702697	12.0852	3.26651	7946.9	16183.6
Tb927.11.3360	Component of motile flagella 22	2.727	0.703	6.59341	4179	6918	6972	57.7279	0.653459	1.73767	1.67515	1233.38	704.233
Tb927.11.3380	Ran-binding protein 1, putative	0.471	0.761	27.4262	2863	4741	4883	229.514	0.740411	6.9086	5.44793	33107.7	23109.7
Tb927.11.3480	Sin-like protein conserved region, putative	2.133	0.714	1.87266	2910	5346	5029	53.8364	0.670186	1.62053	2.10174	2322.5	985.688
Tb927.11.3490	hypothetical protein, conserved	2.394	0.735	14.6016	7864	12624	13319	123.132	0.688582	3.7064	2.69738	4658.62	3523.5
Tb927.11.3500	Dpy-30 motif containing protein, putative	3.051	0.739	8.84086	4456	7455	7486	55.344	0.686599	1.66591	2.62578	4321.76	1509.25
Tb927.11.3510	hypothetical protein, conserved	2.55	0.724	3.52526	2873	5538	5318	46.278	0.676094	1.39301	2.27709	2904.3	977.963
Tb927.11.3570	metallo-peptidase, Clan MA(E) Family M1	2.613	0.735	22.9358	9967	16421	17634	146.381	0.686506	4.40621	2.62247	4306.58	3982.85
Tb927.11.3580	Thiamin pyrophosphokinase, vitamin B1 binding domain containing protein, putative	1.305	0.727	4.58716	1855	3183	3026	53.7204	0.692729	1.61704	2.85343	5450.01	1700.03
Tb927.11.3590	40S ribosomal protein S4, putative	0.819	0.791	31.6302	17636	28077	31246	815.853	0.76385	24.558	7.48681	80369.7	145109
Tb927.11.3610	nucleobase/nucleoside transporter 8.1	1.305	0.74	6.11621	996	1588	1613	28.0879	0.705729	0.845473	3.40363	8912.89	1218.66
Tb927.11.3650	adenylosuccinate synthetase, putative	1.806	0.768	23.77	3764	6023	7022	80.7317	0.727684	2.4301	4.58419	20454.4	5968.37
Tb927.11.3660	dynein light chain Tctex-type, putative	0.348	0.763	11.396	579	911	1037	62.7407	0.745303	1.88856	5.82162	39838.8	7113.77
Tb927.11.370	repressor activator protein 1	2.565	0.713	6.61994	4742	7978	8011	70.303	0.664953	2.11619	1.95776	1905.34	1133.64
Tb927.11.3700	Uncharacterised ACR, YagE family COG1723, putative, unspecified product	1.737	0.731	5.45455	2387	4181	3956	55.4688	0.691461	1.66967	2.8048	5194.78	1702.17
Tb927.11.3710	hypothetical protein, conserved	1.545	0.747	10.3359	4227	6993	7405	104.688	0.709711	3.15121	3.59248	10362	5003.04
Tb927.11.3730	leucyl-tRNA synthetase, putative	3.222	0.743	16.7442	6717	10745	11697	78.8391	0.68915	2.37314	2.71824	4759.8	2287.34
Tb927.11.3740	proteasome regulatory ATPase subunit 2	1.311	0.74	15.2207	3592	6116	6302	105.84	0.70565	3.18587	3.4	8886.39	4583.34
Tb927.11.3750	NADH-cytochrome b5 reductase, putative	0.918	0.723	5.42888	989	1584	1516	38.9607	0.694256	1.17276	2.91316	5774.23	1279.51
Tb927.11.3770	Dpy-30 motif containing protein, putative	0.786	0.729	12.6743	2233	3902	3854	109.905	0.702403	3.30824	3.2535	7858.94	4398.62
Tb927.11.3790	hypothetical protein, conserved	0.876	0.701	4.55063	2037	3586	3587	90.833	0.672922	2.73416	2.1812	2575.8	1777.25
Tb927.11.3830	hypothetical protein, conserved	1.062	0.699	3.75587	1260	2196	2035	44.9066	0.668084	1.35173	2.04268	2144.96	781.299
Tb927.11.3850	AMP deaminase, putative	4.674	0.729	1.49669	5365	9715	9570	45.5907	0.664142	1.37233	1.93633	1847.73	720.815
Tb927.11.3860	hypothetical protein, conserved	1.353	0.706	3.68732	1743	3039	2959	49.6029	0.671104	1.49309	2.1281	2404.66	928.658
Tb927.11.3880	actin, putative	1.299	0.727	3.84025	1416	2449	2501	42.422	0.692808	1.27694	2.85649	5466.3	1345.05
Tb927.11.3940	hypothetical protein, conserved	0.963	0.722	4.14079	1659	2790	2928	66.3624	0.69256	1.99757	2.84691	5415.31	2091.51
Tb927.11.3970	hypothetical protein, conserved	2.187	0.716	3.65297	4056	6874	6831	70.6087	0.671634	2.12539	2.14345	2453.37	1339.04
Tb927.11.3980	metallo-peptidase, Clan ME, Family M16	1.554	0.744	16.0565	3026	5063	5401	75.2697	0.706602	2.26569	3.44417	9212.25	3335.71
Tb927.11.4000	hypothetical protein, conserved	1.743	0.694	3.43643	3100	5187	5044	66.6349	0.654393	2.00578	1.69651	1277.75	831.534
Tb927.11.4130	ubiquitin-like protein, putative	1.86	0.718	4.83092	4596	7210	7433	90.4874	0.677085	2.72376	2.30793	3015.34	1958.8
Tb927.11.4160	predicted C2 domain protein	3.705	0.715	1.34844	3263	5602	5565	33.836	0.657255	1.0185	1.76365	1423.87	452.611
Tb927.11.4190	Metallopeptidase family M24, putative	1.614	0.737	2.47372	1323	2347	2352	32.2568	0.698887	0.970961	3.10199	6879.99	1185.37
Tb927.11.4200	mannose-specific lectin, putative	1.635	0.74	4.884	6568	10604	11394	152.02	0.70164	4.57596	3.22	7635.26	5972.51
Tb927.11.4210	U-box domain containing protein, putative	1.89	0.738	11.0935	2102	3320	3712	42.072	0.696757	1.26641	3.01365	6347.22	1468.15
Tb927.11.4230	hypothetical protein, conserved	3.603	0.744	1.94121	2824	5150	5158	31.4542	0.687055	0.946803	2.64209	4397.08	867.328
Tb927.11.4280	hypothetical protein, conserved	4.296	0.721	1.39567	3557	6662	6276	33.1446	0.65882	0.997685	1.80148	1510.72	460.527
Tb927.11.4300	60S ribosomal protein L18, putative	0.579	0.807	25.7732	21863	34157	35352	1375.99	0.784172	41.4186	9.86279	173393	400805
Tb927.11.4320	Uncharacterized ACR, COG1678, putative	1.425	0.74	9.10364	3410	5735	5743	90.8095	0.704188	2.73346	3.33323	8408.06	3795.33
Tb927.11.4330	hypothetical protein, conserved	0.567	0.685	7.01754	534	881	883	35.1856	0.66241	1.05912	1.89138	1730.56	533.406
Tb927.11.4360	Protein of unknown function (DUF1014), putative	0.951	0.747	10.3359	2608	4381	4738	131.482	0.717744	3.95772	4.00604	14042.9	7636.49
Tb927.11.440	conserved protein	1.086	0.708	6.80272	4940	7904	7611	203.478	0.676737	6.12487	2.29703	2975.8	4367.57
Tb927.11.4420	hypothetical protein, conserved	1.587	0.746	5.03145	2817	4602	4945	67.6997	0.708207	2.03783	3.51997	9789.04	3119.43
Tb927.11.4450	ALBA-Domain Protein	0.351	0.703	36.7232	5547	8736	8811	572.026	0.685226	17.2186	2.57736	4103.09	15088.3
Tb927.11.4460	ALBA-Domain Protein	0.375	0.733	26.455	9309	14609	15234	907.003	0.714629	27.3017	3.8403	12481.4	48842.2
Tb927.11.4480	Flagellar radial spoke protein 4/6	1.755	0.737	11.3766	5264	8944	9202	115.708	0.697257	3.48292	3.03417	6468.51	4087.09
Tb927.11.4530	N-acetyltransferase subunit ARD1	0.717	0.755	11.1111	1555	2505	2722	82.081	0.729597	2.47072	4.70472	21990.3	6356.63
Tb927.11.4550	Domain of unknown function (DUF4200), putative	0.897	0.741	7.77778	1795	3076	2903	75.3028	0.712587	2.26669	3.73541	11553.4	3858.98
Tb927.11.460	predicted WD40 repeat protein	2.844	0.7	2.80998	1202	2047	2237	16.6896	0.649408	0.502374	1.58558	1058.09	184.529
Tb927.11.4610	protein kinase A regulatory subunit	1.497	0.736	23.3333	1945	3305	3231	49.2511	0.699294	1.48251	3.11918	6986.87	1827.87
Tb927.11.4650	Mitochondrial ribosomal protein L52, kinetoplast ribosomal PPR-repeat containing protein 13	4.566	0.707	6.41026	3121	5501	5335	26.5174	0.642895	0.798198	1.45155	827.011	250.321
Tb927.11.4680	SURF1 family, putative	1.038	0.725	4.80307	1476	2379	2331	52.0503	0.694435	1.56677	2.92024	5813.47	1716.83
Tb927.11.4700	prostaglandin f synthase	0.828	0.753	26.4741	4922	7292	8598	219.244	0.725702	6.59945	4.4626	18976.5	15447
Tb927.11.4780	pyruvate dehydrogenase (lipoamide) kinase, putative	1.335	0.679	2.98954	2007	3313	3176	55.5359	0.644337	1.67169	1.48021	873.385	542.929
Tb927.11.4800	clathrin coat assembly protein, putative	1.476	0.712	4.73293	1834	3265	3329	49.2981	0.675553	1.48392	2.26044	2845.45	1028.19
Tb927.11.4820	60S ribosomal protein L17, putative	0.498	0.807	19.9601	11617	18645	20203	878.219	0.785829	26.4353	10.0869	184611	266311
Tb927.11.4860	Ring finger domain containing protein, putative	1.398	0.743	9.99286	4236	6602	7511	114.255	0.707529	3.43918	3.48774	9541.01	5178.59
Tb927.11.4880	Calmodulin-binding, putative	0.822	0.737	9.69697	2820	4889	5000	133.615	0.709801	4.02193	3.59688	10397.4	6399.44
Tb927.11.4900	WD40/YVTN repeat-like-containing protein	1.68	0.716	10.6952	6089	9584	10150	134.21	0.677116	4.03986	2.30887	3018.77	2907.4
Tb927.11.4910	predicted ankyrin repeat family protein	1.176	0.764	14.419	4364	7153	7517	140.662	0.731467	4.23407	4.82555	23602.3	11399.1
Tb927.11.4920	hypothetical protein, conserved	0.816	0.747	13.431	1517	2399	2461	68.1843	0.7199	2.05241	4.12492	15236.5	4172.93
Tb927.11.4950	hypothetical protein, conserved	2.358	0.696	8.04744	1641	2856	2819	26.9119	0.649933	0.810076	1.59692	1079.32	301.37
Tb927.11.4980	ATP-dependent DEAD/H RNA helicase, putative	1.803	0.735	4.42968	1553	2676	2854	33.9686	0.694717	1.02249	2.93143	5875.82	1128.12
Tb927.11.5000	Dynein intermediate chain 1, axonemal	1.965	0.738	13.7195	4441	7573	7895	87.8129	0.695946	2.64325	2.98071	6155.56	3004.65
Tb927.11.5020	hypothetical protein, conserved	5.118	0.721	1.36692	4603	7892	7991	34.7546	0.653131	1.04615	1.66772	1218.17	420.614
Tb927.11.5050	fumarate hydratase, class I	1.665	0.741	15.5875	2765	4462	4510	61.5309	0.70229	1.85214	3.2485	7825.27	2455.83
Tb927.11.5090	aspartate aminotransferase, mitochondrial	1.164	0.746	11.9617	995	1878	1838	32.3701	0.713633	0.974373	3.7888	12020	1701.52
Tb927.11.510	RNA-binding protein, UBP2	0.525	0.705	11.3636	1006	1815	2056	79.3957	0.683263	2.38989	2.50963	3809.31	1996.74
Tb927.11.5100	hypothetical protein, conserved	2.898	0.699	1.48478	1942	3399	3277	27.7977	0.647929	0.836737	1.55412	1000.54	296.514
Tb927.11.5140	ubiquitin carboxyl-terminal hydrolase, putative	0.927	0.746	7.52688	2733	4232	4487	107.894	0.717116	3.24773	3.97204	13712.9	6171.67
Tb927.11.5180	hypothetical protein, conserved	0.75	0.728	14.6082	2800	4417	4742	138.789	0.702019	4.17768	3.23661	7745.65	5503.12
Tb927.11.5220	chaperone protein DnaJ, putative	2.298	0.715	7.38809	3786	6495	6467	63.2826	0.669523	1.90487	2.08293	2264.95	1140.14
Tb927.11.5230	hypothetical protein, conserved	0.705	0.729	12.7119	1272	2007	2112	66.6082	0.703811	2.00497	3.31622	8288.88	2758.47
Tb927.11.5250	hypothetical protein, conserved	4.752	0.704	0.84122	2167	3863	4123	18.429	0.638603	0.55473	1.36945	703.028	156.753
Tb927.11.5270	ubiquitin carboxyl-terminal hydrolase, putative	2.295	0.705	2.61097	3707	5746	5522	57.3791	0.659552	1.72717	1.81947	1553.18	811.557
Tb927.11.5290	mitochondrial carrier protein	0.846	0.691	9.42285	1493	2476	2443	65.9282	0.663407	1.9845	1.91712	1797.04	1023.93
Tb927.11.530	RNA-binding protein, putative	0.6	0.714	8.29187	64	106	117	4.13213	0.690762	0.124381	2.77832	5059.13	124.668
Tb927.11.5300	Kinesin-13 3, putative	1.698	0.731	11.7578	3148	5178	5450	70.5318	0.691908	2.12308	2.82183	5283.27	2187.99
Tb927.11.540	ABC transporter, mitochondrial, putative	2.073	0.7	5.50551	1537	2871	2829	30.0593	0.656806	0.904815	1.75295	1399.91	397.737
Tb927.11.5400	signal recognition particle 54 kDa	1.461	0.714	10.2459	2928	5250	5334	79.8009	0.677738	2.40209	2.32846	3090.77	1755.07
Tb927.11.5440	malic enzyme	1.692	0.761	17.6991	8434	13715	15394	192.498	0.721977	5.79437	4.24275	16482	12390.1
Tb927.11.5450	malic enzyme	1.713	0.735	15.7343	5334	8781	9380	119.141	0.695736	3.58627	2.97219	6106.62	4055.78
Tb927.11.550	hypothetical protein SCD6.10	0.84	0.771	27.2835	5689	8964	9587	251.361	0.743505	7.56623	5.68136	37218.7	27283.1
Tb927.11.5500	Mitochondrial SSU ribosomal protein, putative	2.436	0.723	3.69004	1729	3059	3123	28.0765	0.676177	0.845131	2.27966	2913.44	594.521
Tb927.11.5510	dynein light chain p28, axonemal, putative	0.705	0.73	18.3616	1943	3140	3420	104.607	0.704811	3.14876	3.3615	8608.52	4438.56
Tb927.11.5520	triosephosphate isomerase	0.75	0.824	19.9203	14776	22403	24991	723.128	0.798019	21.7669	11.9004	292798	294787
Tb927.11.5600	Archaic Translocase of outer membrane 14 kDa subunit	0.357	0.723	19.4444	725	1161	1229	75.5489	0.705075	2.2741	3.37358	8695.09	3226.26
Tb927.11.5650	replication factor C, subunit 1, putative	1.761	0.735	2.26757	3051	5255	5146	66.3276	0.695189	1.99653	2.95025	5981.69	2228.16
Tb927.11.5680	dynein light chain 1, axonemal	0.63	0.71	14.218	2486	3911	4258	147.033	0.686188	4.42585	2.6112	4255.17	3969.9
Tb927.11.5840	Protein translation factor SUI1 homolog, putative	0.327	0.76	15.1515	1782	2826	2892	198.985	0.742845	5.98966	5.63076	36301.1	21255.1
Tb927.11.5850	RNA-binding protein 38, putative	1.413	0.737	4.23729	6387	10387	10830	170.06	0.701339	5.11899	3.20689	7548.86	6632.67
Tb927.11.5910	WASH complex subunit 7, N-terminal/WASH complex subunit 7/WASH complex subunit 7, C-terminal, putative	3.771	0.715	1.32485	3700	5978	6533	37.408	0.656743	1.12602	1.75145	1396.55	494.211
Tb927.11.5960	hypothetical protein, conserved	0.426	0.793	12.3457	5688	8922	9370	647.911	0.773419	19.5028	8.52435	115434	145370
Tb927.11.5970	phosphoinositide-specific phospholipase C, putative	2.142	0.713	4.1958	1770	2832	2907	30.6159	0.669093	0.921569	2.07083	2228.46	545.877
Tb927.11.600	Mitochondrial ATP synthase subunit, putative	0.318	0.81	14.3369	1821	2825	2839	204.832	0.793083	6.16566	11.1297	242911	74071.1
Tb927.11.6000	mitochondrial ribosomal protein L4	1.053	0.709	5.7971	1514	2592	2666	55.6796	0.678215	1.67601	2.34356	3147.03	1238.82
Tb927.11.6040	Nodulin-like, putative	1.929	0.72	4.65839	890	1404	1416	16.8349	0.678333	0.506746	2.34732	3161.14	375.636
Tb927.11.6050	Flagellar-associated PapD-like, putative	5.121	0.729	1.17096	5724	9833	9902	43.1688	0.661111	1.29942	1.85835	1647.55	634.116
Tb927.11.6070	hypothetical protein, conserved	1.305	0.733	5.19481	1487	2552	2560	49.6545	0.698729	1.49465	3.09535	6838.98	1817.73
Tb927.11.6090	tatD related deoxyribonuclease, putative	1.002	0.703	3.9801	272	545	514	11.3626	0.67297	0.342024	2.18263	2580.53	222.583
Tb927.11.610	hypothetical protein, conserved	1.068	0.705	8.03213	1660	2758	3140	65.7554	0.673997	1.9793	2.21324	2682.76	1320.6
Tb927.11.6130	SKP1-like protein	0.546	0.785	12.7505	3701	6135	6367	257.005	0.762832	7.73609	7.38415	77333	44595.7
Tb927.11.6140	40S ribosomal protein S15A, putative	0.39	0.789	25.4453	14594	23082	23732	1368.13	0.770265	41.1822	8.16734	102447	284338
Tb927.11.6160	eukaryotic release factor 3, putative	2.094	0.757	10.968	3866	6362	6802	70.6672	0.713588	2.12715	3.78647	11999.4	3710.49
Tb927.11.6170	protein transport protein SEC31, putative	3.693	0.715	6.76407	4829	7899	8233	49.4441	0.657348	1.48832	1.76589	1428.93	662.9
Tb927.11.6180	60S ribosomal protein L28, putative	0.438	0.803	27.2109	25423	41949	41901	2162.87	0.783146	65.1045	9.72638	166785	614503
Tb927.11.6190	hypothetical protein, conserved	0.435	0.701	9.13242	347	497	540	27.8872	0.681214	0.839432	2.44083	3525.1	667.308
Tb927.11.6210	Lanosterol 14-alpha demethylase	1.443	0.749	13.8313	1718	3008	2940	46.0363	0.712963	1.38574	3.75448	11718.8	2380.79
Tb927.11.6230	protein transport protein SEC61 subunit alpha, putative	1.443	0.782	6.91563	12517	21384	22994	340.951	0.745963	10.263	5.87396	40846.2	39282.6
Tb927.11.6250	Mitochondrial ATP synthase subunit, putative	0.807	0.755	16.0494	1535	2727	2667	74.1678	0.72805	2.23252	4.60702	20739.9	5532.09
Tb927.11.6270	inositol-1,4,5-trisphosphate (IP3) 5-phosphatase, putative	1.692	0.724	4.71976	1059	2111	2135	26.7823	0.684977	0.806175	2.56865	4064.54	702.17
Tb927.11.6280	pyruvate phosphate dikinase	2.739	0.754	25.8935	3116	5396	5426	44.1303	0.70435	1.32837	3.34057	8459.83	1851.68
Tb927.11.630	RNA polymerase I second largest subunit	4.788	0.72	4.38322	5278	9373	9820	44.1409	0.654356	1.32868	1.69564	1275.93	550.328
Tb927.11.6300	40S ribosomal protein S5, putative	0.57	0.831	22.6876	9799	15159	16281	630.243	0.80835	18.9709	13.6904	432848	330152
Tb927.11.6320	MRB1-associated protein	1.416	0.655	2.81889	2324	3803	4012	62.2536	0.619301	1.87389	1.05403	338.69	331.437
Tb927.11.6330	6-phosphogluconolactonase	0.798	0.756	12.4844	763	1127	1284	34.7647	0.729201	1.04645	4.67949	21662.8	2666.5
Tb927.11.6350	AAA ATPase, putative	3.813	0.725	1.31027	5317	9031	9323	53.8929	0.666419	1.62223	1.99708	2014.03	900.512
Tb927.11.6360	60S ribosomal protein L24, putative	0.573	0.786	10.4167	1695	2745	2776	109.504	0.763291	3.29618	7.43021	78686.4	19213.9
Tb927.11.6390	START domain containing protein, putative	0.876	0.75	13.6519	2723	4531	4643	117.887	0.721922	3.54852	4.23957	16447.5	7577.63
Tb927.11.6410	hypothetical protein, conserved	4.362	0.716	1.14548	3477	6358	6186	31.7358	0.653344	0.955279	1.67254	1228.01	386.069
Tb927.11.6420	hypothetical protein, conserved	3.957	0.718	6.31313	4119	6857	7393	40.2981	0.658323	1.21301	1.7894	1482.62	553.216
Tb927.11.6430	hypothetical protein, conserved	3.777	0.732	2.6455	6925	11453	11317	68.5919	0.673696	2.06468	2.20424	2652.45	1367.56
Tb927.11.6440	hypothetical protein, conserved	1.323	0.728	11.3122	6414	10284	10949	181.967	0.693493	5.47738	2.88317	5609.95	5866.35
Tb927.11.6460	hypothetical protein, conserved	2.862	0.753	14.6597	6195	9806	10925	81.9427	0.702248	2.46656	3.24665	7812.88	3267.18
Tb927.11.6530	hypothetical protein, conserved	1.245	0.715	10.4167	3810	6164	6197	113.306	0.681526	3.41062	2.4512	3567.03	2731.92
Tb927.11.6540	hypothetical protein, conserved	1.65	0.699	2.41984	1758	3313	3111	42.7371	0.660464	1.28643	1.84212	1607.72	617.995
Tb927.11.6570	Nodulin-like, putative	1.827	0.742	4.37158	5923	9481	10064	121.499	0.70145	3.65725	3.21172	7580.61	4751.48
Tb927.11.6590	metallo-peptidase, Clan MF, Family M17	1.563	0.762	19.1571	3444	5429	6173	83.7182	0.724494	2.52	4.3901	18128.9	5728.03
Tb927.11.6610	hypothetical protein, conserved	1.182	0.738	12.7854	2074	3253	3450	70.1337	0.705384	2.11109	3.38774	8797.31	3017.55
Tb927.11.6630	3-methylcrotonoyl-CoA carboxylase beta subunit, putative	1.836	0.692	2.1751	2275	4125	3974	48.8412	0.65135	1.47017	1.62792	1138.79	566.09
Tb927.11.6660	Tex-like protein N-terminal domain/Helix-hairpin-helix motif containing protein, putative	2.805	0.707	1.4245	1963	3576	3952	29.0601	0.656756	0.874737	1.75175	1397.23	384.043
Tb927.11.670	epsinR	1.515	0.743	8.5639	5828	9105	9670	141.861	0.706074	4.27016	3.41961	9030.13	6206.81
Tb927.11.6710	predicted tetratricopeptide repeat (TPR) protein	1.194	0.704	6.1082	1628	2736	2597	50.7888	0.671219	1.52879	2.1314	2415.1	953.507
Tb927.11.6720	mRNA cap guanine-N7 methyltransferase, putative	3.171	0.678	7.24638	3117	5513	5328	38.1673	0.624578	1.14887	1.13223	413.537	230.97
Tb927.11.6780	regulator of chromatin condensation, putative	1.68	0.727	3.56506	1257	2312	2333	30.2524	0.688116	0.910626	2.68036	4577.06	855.936
Tb927.11.6790	predicted WD40 repeat protein	2.343	0.728	8.09889	3489	6103	6340	58.8042	0.682079	1.77007	2.46966	3642.49	1437
Tb927.11.680	ribosomal protein L21E (60S), putative	0.477	0.769	31.25	14478	23145	24425	1129.03	0.74828	33.985	6.06156	44590.3	137610
Tb927.11.6810	tubulin-tyrsoine ligase-like protein, putative	2.94	0.703	3.73768	2675	4692	4793	35.7965	0.651561	1.07751	1.63257	1147.9	417.022
Tb927.11.6820	hypothetical protein, conserved	1.419	0.716	3.51617	1784	2937	2969	47.1878	0.680263	1.4204	2.40958	3400.62	1103.4
Tb927.11.6830	Domain of unknown function(DUF2779), putative	2.901	0.713	2.75482	2790	5027	5076	38.3794	0.661903	1.15526	1.87842	1697.67	574.706
Tb927.11.6870	14-3-3 protein 2	0.756	0.754	34.2556	5687	9524	10318	291.952	0.727916	8.78803	4.59863	20634.6	21705.3
Tb927.11.6980	Phosphoenolpyruvate carboxykinase, related	1.821	0.731	5.48246	1831	3244	3392	40.1296	0.690517	1.20794	2.76908	5012.37	1203.54
Tb927.11.7020	proteasome alpha 7 subunit, putative	0.741	0.755	22.8495	5081	7978	8026	248.61	0.729176	7.48341	4.67789	21642.2	19057.2
Tb927.11.7060	acidocalcisomal pyrophosphatase	1.242	0.761	3.21285	3233	5358	5379	97.8751	0.727566	2.94614	4.57691	20363.9	7215.19
Tb927.11.710	SCAMP family, putative	1.203	0.718	3.31675	4548	7584	7737	143.498	0.685096	4.31942	2.57279	4082.83	3773.02
Tb927.11.7100	cytoplasmic translation machinery associated protein, putative	0.609	0.736	16.3399	1321	2157	2195	80.9282	0.712588	2.43602	3.73548	11554.1	4147.4
Tb927.11.7140	cell cycle sequence binding phosphoprotein (RBP45), putative	0.939	0.724	8.49257	2227	3655	3801	89.5961	0.694929	2.69693	2.93987	5923.18	2990.91
Tb927.11.7150	NGG1 interacting factor 3-like	0.843	0.705	7.0922	2143	3408	3333	92.1244	0.677455	2.77303	2.31954	3057.85	2012.23
Tb927.11.7170	seryl-tRNA synthetase	1.437	0.76	25.6944	6294	10248	10875	165.924	0.724038	4.99448	4.363	17818.5	11227.5
Tb927.11.720	hypothetical protein, conserved	0.792	0.703	18.8679	7487	11807	12360	348.413	0.676302	10.4876	2.28352	2927.23	7400.02
Tb927.11.7240	nexin-dynein regulatory complex 2	1.521	0.745	4.59318	2122	3316	3381	50.7553	0.708001	1.52778	3.51016	9713.11	2327.02
Tb927.11.7250	hypothetical protein, conserved	1.488	0.71	2.68276	552	957	1039	14.779	0.673405	0.444864	2.19554	2623.35	292.582
Tb927.11.7270	proteasome beta 3 subunit, putative	0.615	0.771	11.3269	1193	1974	2043	73.4362	0.747473	2.2105	5.99557	43249.3	8777
Tb927.11.7350	Histone H2B variant V	0.429	0.749	16.2037	4296	6610	6779	359.559	0.729351	10.8231	4.68901	21786	27679.2
Tb927.11.7380	glycerol-3-phosphate dehydrogenase (FAD-dependent), mitochondrial	1.809	0.778	22.0751	10370	16732	18565	219.343	0.73765	6.60243	5.2477	29823.7	20654
Tb927.11.740	eukaryotic translation initiation factor 5A	0.498	0.773	25.9481	24186	37781	39576	1775.31	0.751829	53.4386	6.36045	50998.3	235847
Tb927.11.7420	phosphoadenosine phosphosulfate reductase-like protein	0.966	0.689	5.15996	1469	2537	2402	57.5949	0.659514	1.73366	1.81854	1550.96	813.861
Tb927.11.7460	luminal binding protein 1 (BiP), putative	1.959	0.818	30.581	24718	38611	42524	471.345	0.776011	14.1879	8.82927	127325	112620
Tb927.11.7470	hypothetical protein, conserved	0.741	0.687	14.7849	1955	3104	3435	99.5438	0.661176	2.99637	1.85998	1651.58	1464.51
Tb927.11.7520	hypothetical protein, conserved	1.092	0.722	3.65297	2244	3412	3529	73.737	0.69065	2.21956	2.77411	5037.79	2218.65
Tb927.11.7530	long-chain-fatty-acid-CoA ligase, putative	2.181	0.717	1.8315	2516	4250	4431	44.5461	0.672695	1.34088	2.17452	2553.86	866.823
Tb927.11.7540	electron-transfer-flavoprotein, alpha polypeptide, putative	0.972	0.751	4.10256	1103	1975	1912	44.3589	0.721423	1.33525	4.211	16140.2	2817.03
Tb927.11.7560	Component of motile flagella 15	1.887	0.764	17.4603	6184	9773	11218	125.189	0.72279	3.76832	4.28977	16996.7	8218.34
Tb927.11.7570	ATP-grasp domain containing protein, putative	2.175	0.698	2.75482	2432	4137	3845	41.7472	0.653756	1.25663	1.68192	1247.33	512.97
Tb927.11.760	protein phosphatase 2C, putative	1.224	0.747	27.7099	9600	16413	17367	306.58	0.71381	9.22835	3.79787	12100.5	16184.3
Tb927.11.7600	hypothetical protein, conserved	0.783	0.719	6.36132	1205	1942	2115	58.3279	0.692454	1.75573	2.8428	5393.55	1833.55
Tb927.11.7740	dynein light chain, putative	0.345	0.67	17.2414	88	115	128	8.47008	0.652379	0.254958	1.65079	1183.99	100.654
Tb927.11.7780	Mitochondrial import receptor subunit ATOM46	1.257	0.726	14.2857	2029	3346	3730	62.7329	0.692365	1.88832	2.83939	5375.5	1967.78
Tb927.11.7840	ribonucleoside-diphosphate reductase large chain	2.514	0.721	11.5217	6290	10307	10978	95.392	0.673433	2.87139	2.19639	2626.16	1889.78
Tb927.11.7890	zinc finger CCCH domain containing protein 44	1.287	0.725	4.65116	2499	4446	4178	74.8884	0.690966	2.25422	2.78602	5098.35	2270.64
Tb927.11.7900	mitochondrial RNA binding protein 16	0.423	0.735	18.7793	4016	6590	6765	355.66	0.715488	10.7057	3.88534	12894.1	19556.2
Tb927.11.800	prefoldin subunit, putative	0.372	0.782	18.6667	3002	4689	4984	295.839	0.763702	8.90505	7.4718	79921	52429.9
Tb927.11.8030	hypothetical protein, conserved	1.251	0.703	4.78469	2612	4364	4291	78.3839	0.669446	2.35943	2.08075	2258.37	1409.58
Tb927.11.8050	Sas10/Utp3/C1D family/Sas10 C-terminal domain containing protein, putative	1.569	0.744	6.36132	3585	6230	6540	90.1021	0.706422	2.71216	3.43577	9149.7	3975.62
Tb927.11.8060	SNARE associated Golgi protein, putative	1.719	0.732	6.38792	5974	9494	10755	132.603	0.692667	3.99148	2.85103	5437.19	4190
Tb927.11.8090	protein phosphatase 1, putative	0.909	0.766	13.1579	998	1747	1833	43.4414	0.737398	1.30763	5.22974	29539.9	4065.55
Tb927.11.810	hypothetical protein, conserved	2.388	0.741	5.01882	696	1335	1440	12.4324	0.694641	0.374227	2.92838	5858.79	412.119
Tb927.11.8120	protein transport protein SEC13, putative	0.981	0.715	6.09756	1594	2681	2693	61.6691	0.685286	1.8563	2.57946	4112.41	1629.01
Tb927.11.8160	dynein heavy chain, putative	12.456	0.747	3.85264	13980	22959	26004	43.8413	0.641121	1.31967	1.41703	773.305	396.409
Tb927.11.8180	hypothetical protein, conserved	0.846	0.721	7.06714	1020	1924	1815	48.3832	0.693407	1.45638	2.87977	5591.52	1556.52
Tb927.11.8200	ribosomal protein S26, putative	0.333	0.841	26.7857	14482	22941	23500	1587.62	0.823688	47.7889	16.8563	773339	1.20682e+06
Tb927.11.8210	RAD50 DNA repair-like protein	4.047	0.725	3.45679	4691	8079	8742	45.9745	0.664649	1.38388	1.94968	1883.51	735.88
Tb927.11.8230	hypothetical protein, conserved	1.191	0.73	4.1876	1111	1684	1728	33.325	0.69726	1.00312	3.03429	6469.25	1177.21
Tb927.11.8260	carbonic anhydrase-like protein	1.266	0.739	7.88022	4055	6083	6751	116.732	0.705245	3.51374	3.38136	8751.14	5005.53
Tb927.11.8270	hypothetical protein, conserved	2.415	0.707	3.9267	2024	3298	3371	33.1126	0.660379	0.996723	1.83999	1602.55	477.834
Tb927.11.8290	DIS3-like exonuclease, putative	2.685	0.694	3.34821	2693	4969	4744	39.905	0.644842	1.20118	1.49038	890.225	394.927
Tb927.11.8310	class I transcription factor A, subunit 4	1.164	0.657	3.42759	3169	5316	5273	102.761	0.624633	3.09321	1.13308	414.402	622.697
Tb927.11.8380	NADPH--cytochrome P450 reductase, putative	1.905	0.726	4.2328	2848	5042	5140	59.1141	0.684593	1.77939	2.55533	4006	1535.48
Tb927.11.8440	haloacid dehalogenase-like hydrolase, putative	0.861	0.707	15.5317	3064	4918	5221	133.371	0.679163	4.01459	2.37388	3261.93	3036.43
Tb927.11.850	Atypical serine/threonine protein kinase BUD32, putative	0.738	0.727	5.39811	1125	1770	1785	55.3856	0.701228	1.66716	3.20206	7517.17	2154.32
Tb927.11.8770	ATP-dependent RNA helicase FAL1, putative	1.203	0.732	12.4378	3760	6124	6554	118.728	0.699096	3.57383	3.11078	6934.5	4385.18
Tb927.11.880	cyclophilin a	0.531	0.792	28.0899	52018	80386	86962	3596.41	0.770139	108.255	8.1534	101960	745156
Tb927.11.8870	DEAD-box ATP-dependent RNA helicase, mitochondrial	1.638	0.717	7.31261	1848	3260	3300	44.3829	0.678605	1.33597	2.35598	3193.75	996.858
Tb927.11.8880	tRNA threonylcarbamoyl adenosine modification protein, Sua5/YciO/YrdC/YwlC family, putative	1.137	0.696	7.89474	1751	2826	2904	57.335	0.664011	1.72584	1.9329	1838.61	903.627
Tb927.11.8890	DNA-dependent RNA polymerases, putative	0.402	0.748	12.3457	1335	2294	2308	127.367	0.728979	3.83386	4.66543	21481.8	9716.77
Tb927.11.8970	ribose 5-phosphate isomerase, putative	0.465	0.769	25.641	6771	10412	11333	533.55	0.748543	16.0604	6.08316	45035	65446.1
Tb927.11.900	isocitrate dehydrogenase, putative	1.239	0.745	20.934	5567	8224	9155	162.287	0.711607	4.88501	3.68608	11132.8	8121.07
Tb927.11.9040	conserved protein	0.363	0.698	17.5439	1029	1658	1776	113.796	0.679925	3.42537	2.39855	3357.37	2639.15
Tb927.11.9050	p21-C-terminal region-binding protein, putative	1.191	0.728	5.86265	2234	3656	3626	69.6531	0.69526	2.09663	2.95309	5997.76	2343.91
Tb927.11.9080	AARP2CN (NUC121) domain/Protein of unknown function (DUF663), putative	3.648	0.731	4.38236	3897	6978	7046	42.4588	0.673701	1.27805	2.20437	2652.88	846.619
Tb927.11.910	hypothetical protein, conserved	3.66	0.716	1.911	3785	6395	6017	38.6122	0.658607	1.16227	1.79629	1498.59	533.73
Tb927.11.9100	Domain of unknown function (DUF4586), putative	0.858	0.699	6.96864	1993	3214	3812	90.8565	0.671212	2.73487	2.13119	2414.42	1705.43
Tb927.11.9130	Replication factor A protein 1	1.389	0.721	10.0575	2124	3690	4193	62.0178	0.685643	1.8668	2.59197	4168.32	1652.47
Tb927.11.9180	ADP-ribosylation factor GTPase activating protein, putative	0.873	0.724	7.99087	1835	3143	3259	81.6046	0.69597	2.45638	2.98165	6160.96	2793.8
Tb927.11.9220	proteasome regulatory non-ATP-ase subunit 2	2.931	0.745	9.54329	6380	10378	11190	82.9537	0.69364	2.49699	2.88889	5641.03	2683.81
Tb927.11.9400	hypothetical protein, conserved	2.661	0.737	12.3874	8973	14327	15106	125.939	0.688062	3.7909	2.67842	4567.85	3558.62
Tb927.11.9420	ATP synthase, putative	0.648	0.763	16.8971	2990	4590	5048	169.797	0.73885	5.11105	5.33382	31209.2	16461.2
Tb927.11.9440	Component of motile flagella 63	1.656	0.712	4.82218	3524	5930	6210	82.053	0.673394	2.46988	2.19523	2622.29	1623.99
Tb927.11.9450	cyclophilin type peptidyl-prolyl cis-trans isomerase, putative	0.57	0.724	6.9808	899	1348	1378	55.7319	0.70135	1.67758	3.20739	7552.12	2174.25
Tb927.11.9470	ADP-ribosylation factor GTPase activating protein, putative	1.059	0.712	3.76648	1098	1841	1888	39.5554	0.681128	1.19066	2.43799	3513.66	944.541
Tb927.11.9530	14-3-3 protein 1	0.786	0.815	26.616	13621	21228	22875	640.05	0.788403	19.2661	10.4453	203493	206601
Tb927.11.9550	replication factor C, subunit 4, putative	1.023	0.733	5.84795	1999	3271	3288	72.8503	0.702657	2.19287	3.26473	7934.82	2933.66
Tb927.11.9590	S-adenosylhomocysteine hydrolase, putative	1.311	0.819	26.6362	54827	88206	93080	1568.38	0.78465	47.2099	9.92693	176557	462179
Tb927.11.9610	eukaryotic translation initiation factor 3 subunit i	1.026	0.762	10.69	4167	6897	7578	157.332	0.731613	4.73585	4.83509	23732.6	12795.2
Tb927.11.9640	glycyl-tRNA synthetase, putative	1.872	0.741	17.6	6485	10062	10569	126.748	0.699954	3.81525	3.14719	7163.34	4779.93
Tb927.11.9670	aminomethyltransferase, mitochondrial, putative	1.125	0.724	7.0922	1506	2605	2622	51.8245	0.69218	1.55997	2.83227	5338	1618.33
Tb927.11.9700	transcription factor BTF3, putative	0.303	0.765	35.9477	10551	16577	17433	1274.5	0.748486	38.3636	6.07851	44939.1	156118
Tb927.11.9710	60S ribosomal protein L10a, putative	0.642	0.822	37.2093	18457	30581	31580	1088.73	0.797963	32.7718	11.8913	292170	443215
Tb927.11.9720	40S ribosomal protein S27, putative	0.258	0.824	19.1571	10584	16699	17280	1494.86	0.808762	44.9969	13.767	439639	790942
Tb927.11.9730	60S ribosomal protein L34, putative	0.51	0.805	11.6959	20723	32354	33163	1474.22	0.783576	44.3756	9.7833	169522	423245
Tb927.11.9780	Nucleoporin NUP119	3.231	0.692	3.09215	3319	5897	5748	40.1238	0.638075	1.20776	1.35968	689.13	336.94
Tb927.11.9790	calmodulin, putative	0.489	0.669	8.13008	2198	3466	3665	165.837	0.648021	4.99186	1.55606	1004.02	1772.92
Tb927.11.980	Nucleoporin NUP158	4.659	0.737	5.79151	8188	14256	15467	70.2981	0.672246	2.11604	2.1613	2510.78	1353.09
Tb927.11.9810	NUDIX hydrolase 3, putative	0.738	0.662	5.39811	1823	2824	2831	88.6753	0.636228	2.66921	1.32604	642.612	712.002
Tb927.11.9860	EF-hand domain pair, putative	0.309	0.734	25.641	12950	20307	21118	1526.47	0.717324	45.9483	3.98326	13821.2	87757.5
Tb927.11.9880	Protein of unknown function (DUF2009), putative	1.353	0.676	4.42478	1652	2842	2962	47.6858	0.641104	1.43539	1.41671	772.825	430.999
Tb927.11.9890	signal recognition particle receptor alpha subunit, putative	1.746	0.709	8.00457	2471	3908	4266	53.1273	0.669359	1.59918	2.07831	2250.99	953.384
Tb927.11.9910	Domain of unknown function (DUF3846)/TPR repeat, putative	1.098	0.704	11.8074	3456	5328	5687	115.177	0.672564	3.46696	2.17066	2541.23	2234.12
Tb927.11.9920	polyubiquitin, putative	2.055	0.812	3.40136	17329	28376	31571	326.247	0.768994	9.82037	8.02778	97637.6	65744.1
Tb927.11.9960	Protein of unknown function (DUF2870), putative	0.882	0.733	6.77966	1434	2293	2455	60.9641	0.704826	1.83508	3.36218	8613.35	2587.7
Tb927.11.9980	2-oxoglutarate dehydrogenase E1 component, putative	3.015	0.742	20.8748	7707	12518	12784	95.5254	0.689909	2.87541	2.74635	4898.39	2822.96
Tb927.2.1800	DNA polymerase delta catalytic subunit, putative	3.078	0.742	2.27199	4837	8169	8479	60.6051	0.689367	1.82427	2.72625	4799.06	1767.61
Tb927.2.1810	chromatin-remodeling complex atpase chain iswi	3.48	0.713	6.02929	5412	9551	9793	61.528	0.657036	1.85205	1.75842	1412.12	818.669
Tb927.2.1860	mitochondrial RNA binding complex 1 subunit	2.616	0.717	1.5273	1523	2795	2561	22.7655	0.668478	0.685265	2.05362	2177.17	399.887
Tb927.2.1890	E2-like ubiquitin-conjugation enzyme	0.876	0.682	5.68828	1530	2545	2395	64.3821	0.653922	1.93797	1.68569	1255.15	794.276
Tb927.2.2120	Serine/threonine-protein kinase NEK22, putative	1.359	0.737	6.60793	1546	2596	2662	43.4685	0.702027	1.30845	3.23696	7747.97	1723.91
Tb927.2.2130	small GTP-binding protein RAB6, putative	0.69	0.689	15.873	803	1375	1335	44.1365	0.66408	1.32855	1.93471	1843.43	696.781
Tb927.2.2160	paraflagellar rod component, putative	0.987	0.721	19.1919	3511	5757	5727	132.326	0.691196	3.98316	2.7947	5142.8	4034.58
Tb927.2.2190	histone deacetylase 3	2.055	0.715	2.42954	1328	2460	2598	26.6923	0.671994	0.803464	2.15394	2486.99	510.64
Tb927.2.2230	hypothetical protein, conserved	1.164	0.727	5.14139	2598	3944	4226	80.9763	0.694633	2.43747	2.92809	5857.2	2683.8
Tb927.2.2340	Glycerophosphoryl diester phosphodiesterase family, putative	3.621	0.7	1.93157	569	902	874	5.68124	0.642913	0.171011	1.4519	827.569	53.6536
Tb927.2.2390	hypothetical protein, conserved	0.483	0.737	10.2881	1368	2328	2370	108.493	0.716151	3.26574	3.92038	13221.1	6062.17
Tb927.2.2430	casein kinase II, alpha chain	1.116	0.708	6.25559	1164	2196	2166	42.5377	0.676308	1.28043	2.28371	2927.9	903.6
Tb927.2.2440	proteasome regulatory non-ATPase subunit 6	1.539	0.763	15.5642	4161	6922	7357	103.972	0.725783	3.12965	4.46753	19035.1	7339.89
Tb927.2.2460	ubiquitin-conjugating enzyme E2, putative	0.594	0.71	10.0503	648	1249	1448	47.7999	0.686879	1.43883	2.63577	4367.78	1312.41
Tb927.2.2470	Kinetoplastid RNA editing protein 1	2.286	0.716	2.18436	2065	3752	3820	36.3493	0.670641	1.09415	2.11478	2362.9	672.921
Tb927.2.2510	Mitochondrial outer membrane protein porin 1	0.81	0.775	27.0603	3400	5379	5919	157.737	0.748	4.74805	6.03855	44119.6	19095.1
Tb927.2.2770	hypothetical protein, conserved	0.375	0.729	13.2275	3716	5917	6114	364.399	0.710629	10.9688	3.63751	10728.4	17807.2
Tb927.2.2940	hypothetical protein, conserved	0.897	0.696	4.44444	894	1474	1475	37.2718	0.667587	1.12192	2.02896	2105	640.691
Tb927.2.2950	Nop14-like family, putative	2.865	0.719	3.83543	1867	3144	3115	24.6882	0.668221	0.743138	2.04648	2156.12	430.964
Tb927.2.2970	mitochondrial carrier protein	0.936	0.69	11.7146	567	1050	937	23.5808	0.660976	0.709805	1.85495	1639.14	345.248
Tb927.2.3020	Component of motile flagella 76	3.096	0.728	2.25879	2465	4254	4391	31.0956	0.675214	0.936009	2.25007	2809.17	643.233
Tb927.2.3030	ATP-dependent Clp protease subunit, heat shock protein 78 (HSP78), putative	2.436	0.745	16.4002	3727	6419	6593	59.5553	0.698177	1.79267	3.07226	6697.6	2151.14
Tb927.2.3080	cytochrome b5-dependent oleate desaturase	1.224	0.735	4.07498	2759	4557	5112	87.8886	0.70181	2.64553	3.22742	7684.46	3467.19
Tb927.2.3180	kinetoplast polyadenylation/uridylation factor 1	3.009	0.737	6.3081	2372	4188	3959	30.3478	0.684961	0.913499	2.56808	4062.03	795.333
Tb927.2.3370	UDP-Gal or UDP-GlcNAc-dependent glycosyltransferase, putative	1.131	0.637	5.29101	1415	2532	2306	47.9324	0.605095	1.44281	0.869314	197.864	180.762
Tb927.2.3440	cysteine peptidase, Clan CA, family C51, putative	0.819	0.686	4.86618	1184	1855	2119	54.6985	0.65885	1.64648	1.80223	1512.48	760.575
Tb927.2.3580	transcription elongation factor s-II, putative	1.401	0.674	8.54701	3763	6530	6628	104.562	0.638491	3.14741	1.36737	700.058	886.966
Tb927.2.3610	Mitochondrial ATP synthase subunit, putative	0.432	0.757	18.3908	1607	2803	2958	146.595	0.737282	4.41267	5.22155	29411	13681
Tb927.2.3620	GTP-binding elongation factor Tu family, putative	2.415	0.716	1.65426	2751	4855	4612	43.9007	0.669379	1.32145	2.07888	2252.7	788.194
Tb927.2.3780	translation initiation factor IF-2, putative	2.499	0.731	11.5907	5474	9336	10265	86.7628	0.683575	2.61165	2.52028	3854.61	2198.63
Tb927.2.3800	guide RNA associated protein 1	1.476	0.747	10.142	3106	4818	5021	76.7432	0.710553	2.31005	3.63376	10697.5	3743.31
Tb927.2.3880	heterogeneous nuclear ribonucleoproteins F/H homologue	1.461	0.696	8.19672	870	1440	1757	23.996	0.659738	0.722302	1.82407	1564.17	340.931
Tb927.2.3990	GRIP-related Arf-binding domain containing protein, putative	3.174	0.699	1.25905	2742	5049	4962	34.6679	0.645553	1.04354	1.50482	914.49	349.068
Tb927.2.4050	hypothetical protein, conserved	3.714	0.743	2.42131	3317	5121	5802	33.4617	0.685185	1.00723	2.5759	4096.63	881.725
Tb927.2.4060	Dynein intermediate chain 138	2.592	0.729	4.23892	3036	5255	5112	44.9143	0.680701	1.35196	2.42392	3457.38	1061.45
Tb927.2.4090	signal recognition particle receptor beta subunit, putative	0.81	0.736	7.38007	1938	3339	3622	94.7263	0.709	2.85136	3.55803	10087.1	4449.56
Tb927.2.4110	Mitochondrial-processing peptidase subunit alpha	1.407	0.71	8.51064	2693	4464	4508	72.1397	0.674415	2.17148	2.22583	2725.54	1463.6
Tb927.2.4130	enoyl-CoA hydratase/Enoyl-CoA isomerase/3-hydroxyacyl-CoA dehydrogenase, putative	2.409	0.703	7.04809	2809	5139	4923	46.1712	0.656437	1.3898	1.7442	1380.49	605.476
Tb927.2.4210	Phosphoenolpyruvate carboxykinase [ATP], glycosomal	1.575	0.801	28.5171	7128	11316	12400	170.516	0.76335	5.1327	7.4362	78863.2	29962.4
Tb927.2.4230	NUP-1 protein, putative	10.941	0.7	2.37573	8288	13845	14745	29.2817	0.600768	0.881408	0.819765	167.983	99.4166
Tb927.2.4240	GTP binding protein, putative	1.101	0.708	10.8696	856	1634	1464	30.9482	0.676521	0.93157	2.29034	2951.67	660.831
Tb927.2.4330	paraflagellar rod protein 5, putative	2.286	0.723	10.0481	2223	3734	3717	36.8271	0.677641	1.10853	2.3254	3079.44	808.036
Tb927.2.4370	trypanothione synthetase	1.881	0.727	20.7006	3415	5952	5850	70.1518	0.685855	2.11164	2.59943	4201.87	1878.84
Tb927.2.4390	endo/exonuclease Mre11	2.256	0.721	2.65604	2671	4541	4405	44.8103	0.67594	1.34883	2.27235	2887.45	943.418
Tb927.2.4400	SSU ribosomal protein, mitochondrial, putative	3.543	0.719	6.48618	2498	4753	4701	29.0047	0.662531	0.873071	1.8945	1738.51	441.002
Tb927.2.4445	hypothetical protein, conserved	0.399	0.669	12.4378	1443	2301	2332	132.319	0.65005	3.98293	1.59946	1084.13	1485.99
Tb927.2.4520	hypothetical protein, conserved	3.762	0.718	3.71846	5544	9403	9245	55.9671	0.659812	1.68466	1.8259	1568.55	796.6
Tb927.2.4530	hypothetical protein, conserved	0.711	0.75	9.80392	1639	2645	2691	85.3953	0.724704	2.57048	4.4026	18273.4	5872.6
Tb927.2.4540	Small nuclear ribonucleoprotein-associated protein B (snRNP-B) (Sm protein B) (Sm-B) (SmB), putative	0.327	0.696	15.1515	1146	1655	1767	122.171	0.678845	3.67746	2.36366	3222.9	2760.04
Tb927.2.4550	2'-O-ribose RNA methyltransferase SPB1 homolog	2.715	0.753	6.99043	3062	5280	5275	43.5277	0.703568	1.31023	3.30533	8213.18	1792.05
Tb927.2.4580	UNC119	0.588	0.738	13.5364	3122	5119	5365	200.608	0.714996	6.03849	3.85945	12655.9	10899.4
Tb927.2.4590	branched-chain amino acid aminotransferase, putative	1.101	0.702	19.0217	6285	10825	11154	222.125	0.670521	6.68619	2.11134	2352.19	4100.16
Tb927.2.4650	hypothetical protein, conserved	0.759	0.724	5.24934	645	1176	1279	35.0015	0.697864	1.05358	3.05924	6618.72	1254.69
Tb927.2.4710	RNA-binding protein, putative	1.323	0.73	18.8537	10364	16895	18079	297.806	0.695493	8.96424	2.96245	6050.95	10078.4
Tb927.2.4780	hypothetical protein, conserved	2.82	0.709	1.77117	3205	5562	5785	44.669	0.658621	1.34458	1.79665	1499.44	617.674
Tb927.2.4810	Component of motile flagella 5	4.02	0.74	5.46856	6664	11429	11653	64.2137	0.67985	1.9329	2.39611	3347.86	1486.53
Tb927.2.4850	Phosducin, putative	0.756	0.736	13.1752	3457	5697	5993	173.771	0.709916	5.23067	3.60248	10442.7	8345.93
Tb927.2.4930	esterase, putative	0.735	0.711	14.9051	1411	2241	2462	72.2591	0.68528	2.17507	2.57925	4111.48	1908.47
Tb927.2.4980	EMG1/NEP1 methyltransferase, putative	0.837	0.709	7.14286	1027	1908	1940	49.9972	0.681554	1.50497	2.45212	3570.75	1206.29
Tb927.2.5030	transcription initiation protein, putative	2.145	0.696	4.18994	2561	4691	4577	47.602	0.652063	1.43287	1.64372	1169.9	561.35
Tb927.2.5060	GTP binding protein, putative	1.182	0.696	18.5654	6340	10188	10632	200.188	0.663384	6.02587	1.91653	1795.51	3107.42
Tb927.2.5130	hypothetical protein, conserved	1.17	0.674	4.26257	1873	2941	3031	58.5973	0.64155	1.76384	1.4253	785.966	535.38
Tb927.2.5150	TPR-repeat protein, putative	1.467	0.694	8.84354	3271	5487	5498	84.4908	0.657664	2.54326	1.77347	1446.09	1141.48
Tb927.2.5160	chaperone protein DnaJ, putative	1.2	0.715	24.1064	14420	22808	24834	450.376	0.682137	13.5568	2.47158	3650.39	11021.1
Tb927.2.5240	pre-mRNA splicing factor 19	1.527	0.701	7.84314	2403	3933	4098	59.453	0.663928	1.7896	1.93074	1832.88	935.134
Tb927.2.5270	dynein heavy chain, putative	12.738	0.739	3.76737	11912	20733	23025	37.7296	0.631929	1.1357	1.25094	546.144	272.924
Tb927.2.5280	Enriched in surface-labeled proteome protein 1	2.106	0.694	3.31911	4096	6382	6474	70.5411	0.650464	2.12336	1.60846	1101.23	800.197
Tb927.2.5660	adenylate kinase, putative	0.78	0.75	22.9885	2535	3838	4292	119.299	0.723505	3.59103	4.33159	17462.9	7968.83
Tb927.2.5760	Flagellar Member 8	9.225	0.703	1.62549	2643	5094	4938	11.8154	0.611882	0.355654	0.953128	255.791	52.5375
Tb927.2.5800	sedoheptulose-1,7-bisphosphatase	0.996	0.728	14.014	2668	4042	4560	98.7561	0.69806	2.97266	3.06739	6668.05	3556.98
Tb927.2.5810	Holliday-junction resolvase-like of SPT6/SH2 domain containing protein, putative	4.629	0.705	3.02245	4603	8166	8058	38.9732	0.640455	1.17313	1.40428	754.057	346.74
Tb927.2.5820	hypothetical protein, conserved	3.243	0.752	3.69686	2874	5152	4921	34.5883	0.697975	1.04114	3.06386	6646.63	1243.22
Tb927.2.5850	small nuclear ribonucleoprotein SmD2	0.333	0.771	11.9048	1839	2943	3009	202.826	0.753688	6.10527	6.52285	54714.5	28188.8
Tb927.2.5870	hypothetical protein, conserved	5.976	0.701	0.839102	2108	3741	4049	14.2849	0.627662	0.429991	1.1806	464.726	93.1664
Tb927.2.5980	chaperone protein ClpB1, putative	2.61	0.742	19.1351	3006	5120	5751	45.9336	0.693534	1.38265	2.88474	5618.46	1482.27
Tb927.2.6000	glycosylphosphatidylinositol-specific phospholipase C	1.074	0.647	11.1421	5075	8615	9106	183.69	0.61591	5.52925	1.00665	297.902	900.677
Tb927.2.6050	beta prime COP protein	2.553	0.718	11.2928	7207	12088	12366	107.809	0.670066	3.24515	2.09833	2311.98	1968.13
Tb927.2.6070	mitochondrial RNA binding complex 1 subunit	0.855	0.704	4.662	1858	3181	3139	82.9238	0.67626	2.49609	2.28224	2922.63	1759.46
Tb927.3.1010	hypothetical protein, conserved	1.8	0.721	17.1936	6362	10200	10753	132.286	0.680751	3.98195	2.42556	3463.9	3130.09
Tb927.3.1030	RNA-binding protein	1.071	0.708	20.4842	3499	5261	5639	117.779	0.676953	3.54527	2.30379	3000.29	2541.42
Tb927.3.1110	Putative intraflagellar transport protein A1	1.431	0.723	9.7629	2141	3389	3873	57.0957	0.687113	1.71864	2.64415	4406.64	1576.57
Tb927.3.1120	GTP-binding nuclear protein rtb2, putative	0.651	0.805	33.6391	10170	15595	17000	572.716	0.780795	17.2393	9.42115	152590	153692
Tb927.3.1140	Surp module, putative	1.17	0.731	5.11509	1689	2876	2797	54.6729	0.69855	1.64571	3.08785	6792.83	1992.76
Tb927.3.1200	hypothetical protein, conserved	2.319	0.697	12.6263	2551	4245	4136	41.1087	0.651315	1.23741	1.62715	1137.28	476.063
Tb927.3.1210	protein transport protein Sec24	2.919	0.739	3.08008	4396	7392	7363	57.1026	0.687745	1.71885	2.66691	4513.3	1601.14
Tb927.3.1240	serine/threonine-protein phosphatase	0.969	0.74	4.11523	1391	2396	2329	54.7468	0.710469	1.64793	3.62961	10663.6	2664.94
Tb927.3.1280	NPL4 family, putative	1.5	0.697	4.88998	1572	2437	2532	38.167	0.660258	1.14886	1.83696	1595.2	549.148
Tb927.3.1290	cullin 4B, putative	2.841	0.714	1.75809	2848	4693	4983	38.3271	0.663434	1.15368	1.91784	1798.92	595.655
Tb927.3.1300	hypothetical protein, conserved	1.23	0.695	7.29927	1522	2633	2815	48.9349	0.661728	1.47299	1.87397	1686.48	729.668
Tb927.3.1350	hypothetical protein, conserved	2.358	0.732	4.65904	1235	2305	2382	21.5821	0.685933	0.649641	2.60217	4214.21	579.111
Tb927.3.1380	ATP synthase subunit beta, mitochondrial	1.557	0.813	16.6667	6875	11055	12211	168.255	0.775566	5.06465	8.77618	125201	39770.3
Tb927.3.1410	cytochrome oxidase subunit VII	0.495	0.734	12.0482	1659	2635	2631	121.88	0.712893	3.66871	3.75095	11688	6292.47
Tb927.3.1590	mitochondrial RNA binding complex 1 subunit	2.004	0.705	11.9581	2846	4795	5142	55.2783	0.662531	1.66393	1.89449	1738.5	840.474
Tb927.3.1600	Mitochondrial import inner membrane translocase subunit 10	0.306	0.718	19.4175	522	839	937	64.7293	0.701405	1.94842	3.20975	7567.66	2528.59
Tb927.3.1620	ER-golgi trafficking TRAPP I complex 85 kDa subunit, putative	4.797	0.713	1.02124	4774	8726	8425	39.5109	0.647294	1.18932	1.54078	976.76	415.005
Tb927.3.1670	hypothetical protein, conserved	3.081	0.712	5.51232	2926	5094	4735	36.0215	0.659342	1.08428	1.81428	1540.86	506.882
Tb927.3.1680	Eukaryotic translation initiation factor 3 subunit F	0.954	0.731	16.7158	3991	6613	7017	160.167	0.701698	4.82118	3.22254	7652.11	6301.48
Tb927.3.1690	Mitochondrial ATP synthase subunit, putative	0.435	0.729	18.2648	1526	2463	2683	132.696	0.709214	3.99427	3.56835	10169	6265.5
Tb927.3.1710	mitochondrial ribosomal protein l24	1.134	0.675	4.39754	1901	3284	3041	63.0752	0.643053	1.89862	1.45466	831.962	597.708
Tb927.3.1730	hypothetical protein, conserved	0.693	0.714	5.74713	1011	1944	1859	59.5488	0.689026	1.79248	2.71366	4737.49	1722.47
Tb927.3.1740	hypothetical protein, conserved	2.049	0.695	4.38596	2517	4418	4262	47.4003	0.652057	1.4268	1.6436	1169.66	558.897
Tb927.3.1790	pyruvate dehydrogenase E1 beta subunit, putative	1.044	0.757	19.1022	3790	6225	6809	139.691	0.726347	4.20485	4.50184	19445.7	9997.48
Tb927.3.1800	hypothetical protein, conserved	4.383	0.705	2.27998	4893	8605	8712	43.878	0.642193	1.32077	1.43779	805.326	407.203
Tb927.3.1810	hypothetical protein, conserved	0.978	0.724	4.07747	1337	2123	2088	49.6081	0.694332	1.49325	2.91614	5790.76	1632.18
Tb927.3.1820	mitochondrial RNA binding complex 1 subunit	0.735	0.648	6.89655	1064	1781	1872	55.5659	0.62228	1.67259	1.09749	379.102	318.017
Tb927.3.1840	3-oxo-5-alpha-steroid 4-dehydrogenase, putative	0.894	0.752	23.4114	8289	13008	14065	344.572	0.723635	10.372	4.33922	17548.9	23089
Tb927.3.1900	conserved protein, unknown function	2.601	0.743	6.52842	4648	7294	7900	66.5952	0.694617	2.00458	2.92745	5853.61	2206.3
Tb927.3.1920	General negative regulator of transcription subunit 5	1.812	0.746	8.26446	5578	8683	9490	114.413	0.705617	3.44394	3.39845	8875.13	4950.57
Tb927.3.1940	TLP18.3, Psb32 and MOLO-1 founding proteins of phosphatase, putative	1.314	0.736	3.03721	1101	1869	1850	31.8643	0.701611	0.959148	3.21874	7626.94	1251
Tb927.3.1970	phosphopantothenoylcysteine synthetase, putative	0.966	0.722	6.19195	892	1721	1605	37.506	0.692514	1.12897	2.84514	5405.93	1180.74
Tb927.3.1990	Tetratricopeptide repeat, putative	1.443	0.724	3.45781	1542	2875	2852	43.3412	0.687963	1.30461	2.6748	4550.64	1221.71
Tb927.3.2050	hypothetical protein, conserved	4.716	0.714	1.05955	5436	8245	9076	42.2652	0.648851	1.27222	1.57366	1036.04	461.036
Tb927.3.2070	hypothetical protein, conserved	4.056	0.709	0.985464	2863	5158	5032	27.8448	0.648581	0.838155	1.56792	1025.53	301.755
Tb927.3.2090	Xaa-Pro aminopeptidase, putative	1.845	0.733	10.8225	1506	2822	2758	33.0653	0.692251	0.9953	2.83498	5352.27	1034.3
Tb927.3.2100	hypothetical protein, conserved	0.924	0.716	23.7325	2132	3586	3672	88.1307	0.687163	2.65282	2.64594	4414.96	2436.48
Tb927.3.2150	protein phosphatase 2C, putative	1.086	0.76	6.42792	774	1484	1458	29.3505	0.728737	0.88348	4.65012	21285.7	2226.01
Tb927.3.2180	Mitochondrial ATP synthase subunit, putative	0.468	0.781	10.6157	2502	3902	4243	197.653	0.760477	5.94956	7.15196	70738.6	32390.9
Tb927.3.2190	Capping enzyme RNA triphosphatase 1	0.759	0.706	6.56168	1558	2657	2667	78.541	0.679864	2.36416	2.39656	3349.59	1818.81
Tb927.3.2220	eukaryotic translation initiation factor 3 subunit j	0.66	0.721	10.5581	1817	2996	2957	102.365	0.696628	3.0813	3.00838	6316.33	3561
Tb927.3.2230	succinyl-CoA synthetase alpha subunit, putative	0.903	0.761	19.8675	3928	6263	6664	162.465	0.732492	4.89035	4.89312	24535.8	13497.8
Tb927.3.2310	PACRGA	0.9	0.745	16.6113	3647	5891	6543	154.964	0.71654	4.66457	3.94112	13417.2	8740.97
Tb927.3.2420	Microsomal signal peptidase 12 kDa subunit (SPC12), putative	0.378	0.726	13.1234	3520	5285	5631	333.017	0.707555	10.0241	3.489	9550.62	15103.8
Tb927.3.2440	AGC essential kinase 1	1.218	0.696	4.914	1108	1726	2013	34.5868	0.662891	1.0411	1.90376	1762.33	530.486
Tb927.3.2470	Pumilio homology domain family member 8	1.812	0.707	3.30579	1682	2665	2869	34.7224	0.666617	1.04518	2.00243	2029.14	582.975
Tb927.3.2490	hypothetical protein, conserved	2.889	0.727	11.4108	5289	8812	9164	70.0077	0.676009	2.1073	2.27447	2894.97	1476.38
Tb927.3.2600	ATP-dependent DEAD/H RNA helicase, putative	6.51	0.75	13.8185	13184	21408	23152	77.2121	0.673456	2.32416	2.19706	2628.41	1530.47
Tb927.3.2670	hypothetical protein, conserved	0.807	0.717	8.64198	968	1479	1667	44.4233	0.69005	1.33719	2.75162	4924.65	1317.31
Tb927.3.2680	Ubiquitin-like domain containing protein, putative	1.593	0.715	2.50627	1985	3229	3263	46.406	0.677136	1.39687	2.3095	3021.08	1005.79
Tb927.3.2750	hypothetical protein, conserved	2.613	0.707	1.91131	1135	2002	2047	17.1575	0.658506	0.516458	1.79383	1492.88	236.585
Tb927.3.2840	inorganic pyrophosphatase, putative	0.783	0.705	5.08906	1278	2143	2205	62.2809	0.678454	1.87472	2.35116	3175.57	1393.74
Tb927.3.2890	radial spoke protein RSP10, putative	0.966	0.698	8.25593	2900	4694	4990	113.235	0.668514	3.40848	2.05464	2180.18	1990.79
Tb927.3.2900	Eukaryotic translation initiation factor 2 subunit alpha	1.254	0.72	17.502	5126	8337	9548	158.931	0.686405	4.78398	2.6189	4290.27	4313.81
Tb927.3.2960	inosine-adenosine-guanosine-nucleosidehydrolase	0.981	0.784	18.2927	23927	36512	38947	886.098	0.754286	26.6724	6.57599	55967	124951
Tb927.3.3000	Putative intraflagellar transport protein C3	1.698	0.779	11.1699	4321	7240	7561	97.7511	0.739908	2.94241	5.41086	32483.1	9723.01
Tb927.3.3030	phosphatidylcholine transfer protein, putative	1.107	0.73	7.20721	2139	3502	3701	73.3174	0.698436	2.20693	3.08306	6763.52	2664.93
Tb927.3.3040	Right handed beta helix region, putative	0.801	0.68	13.6816	2086	3430	3704	99.7457	0.65315	3.00244	1.66816	1219.06	1207.73
Tb927.3.3110	Condensin complex subunit 3, putative	3.183	0.75	1.25549	4005	6446	6797	47.2518	0.696477	1.42233	3.00224	6280.4	1637.75
Tb927.3.3130	Present in the outer mitochondrial membrane proteome 24	4.926	0.717	9.12964	6384	11575	12250	52.8285	0.650416	1.59019	1.60743	1099.25	598.579
Tb927.3.3170	hypothetical protein, conserved	1.962	0.717	4.07125	2508	4241	4272	48.8098	0.674979	1.46922	2.24291	2784.29	1003.92
Tb927.3.3180	Nucleoporin NUP98	2.976	0.72	4.69956	1437	2660	2716	19.7057	0.668247	0.593161	2.04719	2158.21	344.204
Tb927.3.3190	Serine/threonine-protein kinase NEK7, putative	1.509	0.75	11.9048	3683	6088	6406	93.1307	0.713148	2.80332	3.76392	11801.1	4837.97
Tb927.3.3200	Domain of unknown function (DUF4586), putative	1.05	0.705	10.4463	2858	4357	4516	97.8937	0.674259	2.9467	2.22113	2709.52	1978.61
Tb927.3.3220	RNA polymerase-associated protein CTR9, putative	2.703	0.705	5.91279	2382	4632	4469	36.4789	0.655678	1.09805	1.72632	1341.38	469.634
Tb927.3.3270	ATP-dependent 6-phosphofructokinase, glycosomal	1.461	0.841	34.153	54551	83718	93493	1384.65	0.804738	41.6793	13.0359	377556	664457
Tb927.3.3280	vacuolar protein sorting-associated protein 4, putative	1.332	0.743	4.49438	1425	2266	2261	39.0737	0.708376	1.17616	3.52806	9851.89	1807.82
Tb927.3.3300	Flagellum attachment zone protein 19	2.442	0.713	12.2699	7392	12026	13235	116.179	0.666119	3.49711	1.98897	1991.3	1927.19
Tb927.3.3310	60S ribosomal protein L13, putative	0.654	0.837	27.3973	14391	23556	24522	828.952	0.812739	24.9523	14.53	511032	483057
Tb927.3.3330	heat shock protein 20, putative	0.423	0.744	25.8216	1262	2112	2187	113.573	0.724488	3.41865	4.38977	18125.1	7769.64
Tb927.3.3410	aspartyl aminopeptidase, putative	1.353	0.681	11.7994	3316	5366	5764	92.8442	0.646104	2.7947	1.51612	933.778	947.441
Tb927.3.3450	ADP-ribosylation factor-like protein 3, putative	0.534	0.725	26.0708	11439	17835	18598	781.195	0.703077	23.5147	3.2834	8062.06	31781.2
Tb927.3.3490	High mobility group protein TDP1	0.813	0.74	28.1863	4244	6541	7244	193.247	0.71295	5.81692	3.75385	11713.2	9990.81
Tb927.3.3540	Nucleoporin NUP53b	1.533	0.757	5.20833	2224	3582	3746	54.2973	0.719856	1.6344	4.12243	15210.8	3319.45
Tb927.3.3560	U-box domain containing protein, putative	1.872	0.761	16	5820	9246	9983	116.624	0.719954	3.51051	4.12791	15267.4	7146.79
Tb927.3.3580	heat shock protein 90, putative	2.319	0.775	17.6572	13215	21127	22870	214.92	0.729315	6.46931	4.68676	21756.9	16530.6
Tb927.3.3590	U3 small nucleolar ribonucleoprotein protein MPP10, putative	2.016	0.735	6.43883	1521	2709	2734	29.853	0.692404	0.898606	2.84089	5383.44	937.306
Tb927.3.3610	peroxisomal targeting signal 2 receptor, putative	1.083	0.75	11.0497	1948	3127	3449	68.3691	0.71878	2.05798	4.06271	14604.1	4071.99
Tb927.3.3630	Elongation factor Ts, mitochondrial, putative	0.822	0.744	6.06061	533	958	979	25.8729	0.716801	0.778799	3.95511	13550.4	1468.68
Tb927.3.3670	Triple RNA binding domain protein 3	1.869	0.723	5.34188	1392	2646	2741	31.0986	0.681987	0.9361	2.46656	3629.72	758.247
Tb927.3.3690	flagellar radial spoke protein-like, putative	1.644	0.739	12.7505	5944	9615	10406	137.345	0.700534	4.13422	3.17208	7322.49	5253.09
Tb927.3.3750	paraflagellar rod component, putative	0.528	0.733	24.4821	4985	7534	7982	339.19	0.711201	10.2099	3.66584	10963.1	16807
Tb927.3.3760	tryparedoxin 1b, putative	0.432	0.789	22.9885	7539	11921	12341	639.892	0.769282	19.2614	8.05917	98706.6	129852
Tb927.3.3820	hypothetical protein, conserved	1.218	0.722	6.55201	2136	3587	3794	67.7174	0.688891	2.03836	2.7087	4713.36	1952.35
Tb927.3.3830	hypothetical protein, conserved	1.134	0.716	9.67458	1035	1985	2122	38.7469	0.684053	1.16632	2.53667	3924.93	993.329
Tb927.3.3850	COPII coat assembly protein sec16	4.161	0.727	1.68108	3600	5848	6008	32.4083	0.665804	0.975521	1.98049	1967.71	533.497
Tb927.3.3900	carnitine O-palmitoyltransferase II, putative	1.863	0.751	17.6849	2511	4159	4202	50.8081	0.710052	1.52937	3.60918	10496.9	2448.36
Tb927.3.3940	RNA-binding protein, putative	1.779	0.718	4.48934	723	1595	1329	17.485	0.677986	0.526316	2.3363	3119.88	386.868
Tb927.3.3970	Cell growth-regulating nucleolar protein, putative	0.891	0.65	4.47427	1939	3049	3118	79.4614	0.621682	2.39187	1.08862	370.618	448.222
Tb927.3.4000	clathrin coat assembly protein ap19, putative	0.477	0.672	8.33333	2736	4563	4642	216.705	0.65128	6.52305	1.62638	1135.79	2507.46
Tb927.3.4030	hypothetical protein, conserved	3.639	0.738	2.47117	3591	6694	6318	39.3955	0.680772	1.18584	2.42624	3466.62	932.624
Tb927.3.4040	Ankyrin repeats (3 copies), putative	1.857	0.74	12.3656	3106	4934	5359	62.8681	0.699118	1.89239	3.11174	6940.51	2323.3
Tb927.3.4070	Nodulin-like, putative	1.755	0.746	2.23714	39666	64774	70964	867.832	0.706257	26.1226	3.42809	9092.76	38138.7
Tb927.3.4160	XPC-binding domain/UBA/TS-N domain containing protein, putative	0.963	0.713	12.4224	1629	2970	3034	68.1864	0.68356	2.05248	2.51977	3852.41	1727.26
Tb927.3.4190	endosomal integral membrane protein, putative	1.935	0.749	5.15996	4017	6681	7137	79.9939	0.707269	2.4079	3.47545	9447.55	3602.9
Tb927.3.4250	hypothetical protein, conserved	0.666	0.677	5.97907	1114	1764	1842	61.7182	0.652517	1.85778	1.65389	1190.21	735.895
Tb927.3.4270	hypothetical protein, conserved	2.748	0.71	6.17957	8659	15253	14583	121.561	0.660269	3.65911	1.83724	1595.87	1749.5
Tb927.3.4290	Paraflagellar rod protein 1-1	1.767	0.842	41.2429	14051	21963	23504	294.19	0.802121	8.8554	12.5813	341961	132485
Tb927.3.4390	dihydrolipoamide dehydrogenase, putative	1.515	0.696	4.61133	1354	2267	2322	34.0784	0.659074	1.02579	1.80772	1525.36	476.438
Tb927.3.4420	hypothetical protein, conserved	1.329	0.724	3.003	1682	2809	2653	46.8841	0.689415	1.41126	2.72803	4807.79	1369.02
Tb927.3.4500	Fumarate hydratase class I, cytosolic	1.695	0.765	24.1461	1154	2070	2072	26.9855	0.725942	0.812289	4.47719	19150.1	1912.42
Tb927.3.4600	hypothetical protein, conserved	3.237	0.726	5.55556	3931	6722	6760	46.72	0.672025	1.40632	2.15484	2489.89	894.452
Tb927.3.4630	UDP-glucose:glycoprotein glucosyltransferase, putative	5.025	0.712	4.97216	8382	14419	14580	64.5719	0.64475	1.94368	1.48853	887.144	637.628
Tb927.3.4640	VIT family, putative	0.834	0.696	5.97372	881	1363	1396	38.1764	0.668603	1.14915	2.05711	2187.5	672.625
Tb927.3.4660	WD domain, G-beta repeat, putative	1.788	0.727	2.23339	2979	4710	4696	60.6443	0.686885	1.82545	2.636	4368.86	1665.33
Tb927.3.4680	RAB GDP dissociation inhibitor alpha, putative	1.335	0.774	15.6951	6989	11312	11609	195.264	0.739337	5.87764	5.36916	31789.5	19155.2
Tb927.3.4720	dynamin-1-like protein	1.98	0.742	4.03429	9539	15537	15963	180.642	0.699786	5.43751	3.14006	7118.11	6784.75
Tb927.3.4750	Aminopeptidase M1, putative	2.613	0.752	14.1437	4874	7725	8863	71.4119	0.703506	2.14957	3.30252	8193.76	2935.59
Tb927.3.4760	dynamin-1-like protein	1.98	0.748	4.03429	7051	12184	12514	138.887	0.705786	4.18064	3.40627	8932.21	6034.33
Tb927.3.4800	hypothetical protein, conserved	1.857	0.684	2.15054	1919	2893	3256	37.9965	0.643118	1.14373	1.45594	834.02	360.631
Tb927.3.4820	acyltransferase, putative	0.915	0.733	6.53595	1695	2772	3063	71.3034	0.704303	2.1463	3.33845	8444.82	2988.44
Tb927.3.4840	ubiquitin carboxyl-terminal hydrolase, putative	2.193	0.726	10.4736	4850	7981	8524	84.624	0.681574	2.54727	2.45278	3573.45	2042.73
Tb927.3.4850	enoyl-CoA hydratase, mitochondrial precursor, putative	0.801	0.709	7.46269	1022	1761	1666	48.2072	0.68215	1.45109	2.47204	3652.29	1180.07
Tb927.3.4880	nucleosome assembly protein (NAP), putative	0.546	0.702	14.5719	1918	2971	3380	131.481	0.679832	3.95771	2.39554	3345.61	3042.45
Tb927.3.4890	ubiquinone biosynthesis protein COQ7 homolog, putative	0.612	0.704	6.50407	580	986	831	34.1892	0.680531	1.02913	2.41834	3435.2	804.659
Tb927.3.4920	LETM1 and EF-hand domain-containing protein 1, putative	1.134	0.702	7.03606	2186	3667	3839	74.1037	0.670053	2.23059	2.09797	2310.89	1352.4
Tb927.3.4940	5-histidylcysteine sulfoxide synthase, putative	2.247	0.729	3.55556	1728	3393	3257	31.9854	0.68403	0.962792	2.53587	3921.49	819.527
Tb927.3.4970	hypothetical protein, conserved	3.189	0.695	5.95238	4170	7237	7019	50.1914	0.641427	1.51081	1.42292	782.306	457.208
Tb927.3.4990	oxidoreductase, putative	1.017	0.739	5.88235	947	1700	1654	36.529	0.708746	1.09956	3.54579	9990.7	1705.33
Tb927.3.5010	hypothetical protein, conserved	0.579	0.772	29.2096	2682	4133	4338	168.083	0.749172	5.05947	6.13533	46120.8	20934.9
Tb927.3.5020	Flagellar Member 6	4.239	0.726	8.48656	6546	11523	11758	60.8974	0.664234	1.83307	1.93874	1854.16	964.971
Tb927.3.5050	60S ribosomal protein L4	1.122	0.812	25.7778	60431	92362	97730	1954.14	0.780223	58.8215	9.34834	149323	517173
Tb927.3.5060	Ankyrin repeats (many copies)/Ankyrin repeats (3 copies), putative	1.041	0.701	12.4521	5072	8270	8671	183.836	0.670391	5.53365	2.10761	2340.63	3382.68
Tb927.3.5090	tryparedoxin 2, putative	0.594	0.7	15.0754	2044	3374	3435	129.313	0.676879	3.89246	2.30146	2991.83	2785.25
Tb927.3.5180	cofilin/actin depolymerizing factor, putative	0.408	0.798	21.8978	6186	9729	10008	552.575	0.778838	16.6331	9.17436	141699	141407
Tb927.3.5240	kinetoplast ribosomal PPR-repeat containing protein 8	1.743	0.73	2.29095	1816	3045	3022	39.355	0.690393	1.18463	2.76445	4989	1176.77
Tb927.3.5310	paraflagellar rod protein	6.384	0.735	2.50509	2717	4518	4836	16.4266	0.6592	0.494458	1.81081	1532.64	230.358
Tb927.3.5320	UBX domain-containing protein	1.182	0.665	4.12541	1836	3112	3111	59.1923	0.632384	1.78175	1.25868	555.629	432.934
Tb927.3.5340	Hsc70-interacting protein (Hip), putative	1.152	0.732	14.7186	7026	10890	11912	225.888	0.699801	6.79945	3.14067	7121.98	8487.09
Tb927.3.5370	hypothetical protein, conserved	0.939	0.661	13.8004	5523	8373	8806	211.736	0.631929	6.37347	1.25094	546.152	1531.65
Tb927.3.5420	protein transport protein Sec24	2.709	0.706	2.21239	2405	4556	3772	34.3442	0.656623	1.03379	1.7486	1390.23	452.415
Tb927.3.5430	hypothetical protein, conserved	0.813	0.697	8.57843	990	1790	1815	48.6514	0.66995	1.46446	2.09504	2301.89	885.677
Tb927.3.5490	Putative intraflagellar transport protein B2	2.025	0.73	10.1449	5264	8541	9168	98.6984	0.687309	2.97092	2.65121	4439.53	2738.37
Tb927.3.5500	DNA-directed RNA polymerase II subunit 3, putative	1.011	0.703	7.88955	2365	3558	3895	84.9597	0.672835	2.55737	2.17865	2567.43	1658.86
Tb927.3.5520	26S proteasome regulatory non-ATPase subunit	2.733	0.745	13.8889	10250	16859	18067	143.67	0.695405	4.3246	2.95888	6030.65	4851.65
Tb927.3.5530	Tb-292 membrane associated protein	7.389	0.694	5.27597	7361	12735	13340	39.1954	0.612452	1.17982	0.960524	261.367	176.711
Tb927.3.5540	dynein intermediate chain WDRD34, putative	1.602	0.706	7.47664	2669	4160	4412	61.3222	0.668029	1.84586	2.04116	2140.5	1065.48
Tb927.3.5550	intraflagellar transport protein 27	0.549	0.711	12.6812	2726	4427	4624	186.13	0.688772	5.60269	2.70432	4692.11	5350.74
Tb927.3.5580	tryptophanyl-tRNA synthetase	1.167	0.716	7.69231	2872	4482	5041	92.4616	0.683592	2.78319	2.52084	3856.99	2343.97
Tb927.3.5600	hypothetical protein, conserved	0.813	0.656	4.90196	941	1652	1529	43.966	0.62895	1.32342	1.2014	487.928	295.85
Tb927.3.5610	Mitochondrial ribosomal protein L3	1.419	0.714	5.62588	1546	2528	2618	41.0438	0.678263	1.23546	2.3451	3152.78	914.255
Tb927.3.5620	Facilitates chromatin transcription complex subunit spt16	3.036	0.72	14.0111	4916	8106	8582	61.877	0.667728	1.86256	2.03283	2116.24	1067.28
Tb927.3.5660	UDP-GlcNAc:alpha3-D-mannoside beta-1,2-N-acetylglucosaminyltransferase I	1.164	0.609	5.14139	1385	2140	2392	44.3132	0.576633	1.33387	0.590915	67.4011	83.7457
Tb927.3.620	ATP-dependent DEAD/H RNA helicase, putative	2.424	0.664	1.64813	2008	3491	3602	32.5015	0.617292	0.978326	1.0257	313.901	164.802
Tb927.3.640	hypothetical protein, conserved	0.888	0.705	5.61167	3429	5315	5774	142.572	0.67673	4.29155	2.29682	2975.04	3059.76
Tb927.3.680	cytochrome P450, putative	1.752	0.686	3.9886	1097	1874	1811	23.7351	0.646291	0.71445	1.51996	940.394	243.308
Tb927.3.690	CMGC/RCK protein kinase, putative	1.749	0.683	3.42466	1982	3175	3208	41.7845	0.643325	1.25775	1.46003	840.566	398.577
Tb927.3.720	zinc finger protein 3	0.39	0.633	15.2672	5297	8560	8830	504.204	0.614265	15.177	0.984438	279.927	2375.48
Tb927.3.740	ZFP family member, putative	0.738	0.67	5.39811	2888	4458	4629	141.8	0.644228	4.26831	1.47802	869.777	1382.58
Tb927.3.750	SET domain containing protein, putative	1.002	0.697	7.9602	722	1250	1199	27.4557	0.66697	0.826442	2.01205	2056.43	464.939
Tb927.3.780	proteasome alpha 7 subunit	0.711	0.733	18.2073	2638	3967	4574	137.009	0.707704	4.12411	3.49602	9604.35	6236.36
Tb927.3.800	Vacuolar iron transporter 1, putative	0.843	0.695	5.91017	1731	3008	2883	78.3695	0.667455	2.359	2.02534	2094.56	1342.86
Tb927.3.820	LSU ribosomal protein, mitochondrial, putative	0.564	0.699	7.05467	624	1035	1105	42.3866	0.67647	1.27588	2.28874	2945.93	903.946
Tb927.3.830	flap endonuclease-1 (FEN-1), putative	1.179	0.715	7.61421	1764	3111	3080	58.3618	0.682425	1.75675	2.48128	3690.5	1438.22
Tb927.3.910	tubulin gamma chain	1.341	0.733	8.18452	1526	2421	2606	42.5768	0.69826	1.2816	3.0757	6718.57	1540.96
Tb927.3.930	dynein heavy chain, putative	13.917	0.768	13.2902	31058	52863	60320	89.5593	0.656084	2.69582	1.73585	1362.15	1164.42
Tb927.3.970	Mitochondrial SSU ribosomal protein, putative	1.11	0.743	6.28931	1660	2641	2725	55.2275	0.711393	1.6624	3.6754	11043.1	2749.35
Tb927.3.980	hypothetical protein, conserved	2.1	0.714	4.75511	2228	4064	4045	42.4665	0.670526	1.27828	2.11146	2352.59	783.965
Tb927.4.1020	serine-palmitoyl-CoA transferase, putative	1.47	0.755	10.8622	3059	5222	5690	82.1408	0.718627	2.47252	4.05429	14519.8	4874.09
Tb927.4.1080	V-type ATPase, A subunit, putative	1.83	0.782	17.4577	7828	13350	14335	167.927	0.741417	5.05476	5.52274	34391.7	17326.3
Tb927.4.1250	peroxisome biogenesis factor 1, putative	2.733	0.72	2.92398	2737	4470	4993	38.7457	0.670405	1.16628	2.108	2341.82	713.173
Tb927.4.1270	ruvB-like DNA helicase, putative	1.377	0.743	17.3913	5410	8788	9549	149.819	0.707796	4.5097	3.50041	9638.04	6834.78
Tb927.4.1300	amidinotransferase, putative	1.122	0.797	27.5556	19102	30076	33767	642.94	0.765223	19.3531	7.62745	84652.8	118228
Tb927.4.1310	ZFP family member, putative	1.248	0.735	3.53107	2257	4097	3783	70.2877	0.701486	2.11573	3.21328	7590.89	2751.13
Tb927.4.1330	DNA topoisomerase IB, large subunit	2.088	0.721	9.5648	7856	12687	13217	140.956	0.67765	4.24292	2.32567	3080.47	3093.43
Tb927.4.1340	cleavage and polyadenylation specificity factor subunit, putative	2.31	0.735	3.89105	4524	7475	7795	74.528	0.689404	2.24337	2.72761	4805.72	2175.62
Tb927.4.1360	Glucose-6-phosphate 1-epimerase, putative	0.879	0.764	15.873	1178	2053	2161	52.9216	0.735874	1.59299	5.12275	27884.6	4772.9
Tb927.4.1500	RNA editing associated helicase 2	6.501	0.716	1.99877	6279	10470	11317	37.4769	0.639509	1.12809	1.38638	727.548	325.86
Tb927.4.1510	phospholipid-translocating ATPase, putative	3.24	0.728	1.54178	5033	9030	9176	61.9539	0.674	1.86487	2.21334	2683.08	1244.35
Tb927.4.1540	NAD dependent epimerase/dehydratase family, putative	1.524	0.73	7.20367	1677	3077	3181	44.7882	0.692965	1.34817	2.86258	5498.86	1425.5
Tb927.4.1600	AAA domain containing protein, putative	0.702	0.708	5.67376	1906	3066	3402	103.41	0.682864	3.11273	2.4961	3752.3	2575.63
Tb927.4.1630	ribosomal RNA processing protein 6	2.208	0.73	6.62879	4504	7695	7701	81.9364	0.685422	2.46637	2.5842	4133.57	2171.51
Tb927.4.1670	cytochrome b5-like Heme/Steroid binding domain containing protein, putative	0.459	0.697	8.65801	502	903	872	42.7023	0.676675	1.28538	2.29512	2968.88	915.224
Tb927.4.1680	ZFP family member, putative	1.407	0.712	7.80142	3617	5718	6091	95.6234	0.676415	2.87836	2.28703	2939.79	2036.56
Tb927.4.1690	Retinal Maintenance, putative	0.939	0.713	4.24628	2075	3594	3661	85.9318	0.683929	2.58663	2.53242	3906.59	2196.37
Tb927.4.1720	Nucleoside diphosphate kinase 3	1.047	0.726	7.61905	1987	3325	3303	71.5306	0.695303	2.15314	2.95481	6007.52	2409.6
Tb927.4.1740	Component of motile flagella 41	1.266	0.702	8.66824	3419	5630	5940	102.843	0.668245	3.09567	2.04715	2158.07	1796.3
Tb927.4.1790	ribosomal protein L3, putative	1.44	0.811	25.5814	31700	49272	52150	903.907	0.775	27.2085	8.70906	122548	210740
Tb927.4.1850	hypothetical protein, conserved	1.734	0.736	11.5141	3967	6264	6537	84.4741	0.696496	2.54275	3.00299	6284.79	2929.19
Tb927.4.1860	ribosomal protein S19, putative	0.501	0.819	23.8095	20859	33053	33646	1521.58	0.797766	45.801	11.8596	290001	616472
Tb927.4.1890	hypothetical protein, conserved	0.672	0.692	10.3704	1364	2384	2379	78.7573	0.667407	2.37067	2.02402	2090.74	1347.92
Tb927.4.1920	GPI transamidase subunit 16, putative	2.058	0.715	5.82242	5657	9201	9597	103.507	0.671963	3.11567	2.15302	2484.04	1978.65
Tb927.4.1930	eukaryotic translation initiation factor 3 subunit g	0.816	0.765	19.536	4380	7131	7638	203.664	0.7379	6.13048	5.26552	30107	19294.2
Tb927.4.1950	NADPH-dependent diflavin oxidoreductase 1	1.83	0.711	2.72777	3661	5973	6229	75.4683	0.670417	2.27167	2.10834	2342.9	1389.52
Tb927.4.2000	ruvB-like DNA helicase, putative	1.422	0.755	14.7368	5988	9881	10249	159.685	0.719226	4.80667	4.08735	14852.6	9614.13
Tb927.4.2040	DNA/RNA-binding protein Alba 3	0.57	0.787	13.9616	11854	18987	19186	764.076	0.76435	22.9994	7.53776	81904.9	137560
Tb927.4.2060	Flagellum attachment zone protein 8	1.758	0.756	11.3572	5730	9275	10210	124.626	0.716223	3.75137	3.92424	13257.5	6975.94
Tb927.4.2070	antigenic protein, putative	13.365	0.662	1.19689	2604	4564	5031	7.87726	0.552325	0.237113	0.424956	26.8677	8.25181
Tb927.4.2080	Coiled-coil and C2 domain-containing protein	2.718	0.67	21.3157	9757	15534	17473	136.877	0.620541	4.12014	1.0719	354.955	750.995
Tb927.4.2110	protein phosphatase 2C, putative	0.942	0.739	11.6402	1265	2301	2338	53.9395	0.709883	1.62363	3.60089	10429.9	2588.58
Tb927.4.2140	Component of motile flagella 8	3	0.718	1.998	3744	6944	6884	50.4782	0.666038	1.51944	1.98679	1985.21	835.694
Tb927.4.2180	60S ribosomal protein L35a, putative	0.447	0.814	37.7778	22336	33922	35661	1794.32	0.793943	54.0109	11.2603	250945	662548
Tb927.4.2200	Sec7 domain containing protein, putative	5.013	0.736	0.797448	3265	5997	5879	26.079	0.668831	0.785003	2.06348	2206.44	462.031
Tb927.4.2220	TPR-repeat-containing chaperone protein DNAJ, putative	2.115	0.743	2.36072	2493	3921	3931	42.8469	0.699371	1.28974	3.12241	7007.11	1593.15
Tb927.4.2240	Aminotransferase class IV, putative	1.17	0.727	17.0503	2507	4462	4389	83.9136	0.69455	2.52588	2.92479	5838.76	2775.54
Tb927.4.2280	hypothetical protein, conserved	1.146	0.715	6.09225	1203	2173	2103	41.2934	0.682885	1.24297	2.49678	3755.17	1029
Tb927.4.2300	hypothetical protein, conserved	2.118	0.702	5.65771	2252	4117	3982	42.2101	0.65834	1.27057	1.7898	1483.55	579.698
Tb927.4.2310	asparaginyl-tRNA synthetase, putative	2.238	0.744	14.9701	8047	13332	14541	155.703	0.69912	4.68681	3.11181	6940.95	5754.25
Tb927.4.2340	hypothetical protein, conserved	1.575	0.717	3.24886	2218	3655	3766	53.244	0.67935	1.6027	2.37992	3285.13	1217.72
Tb927.4.2350	twinfilin	0.96	0.733	6.23053	859	1583	1583	36.0648	0.703606	1.08559	3.30703	8224.97	1486.17
Tb927.4.2360	hypothetical protein, conserved	0.96	0.731	4.15369	1363	2318	2555	56.0703	0.701606	1.68777	3.21853	7625.52	2201.07
Tb927.4.2410	Glycosyl hydrolase family 65 central catalytic domain/Haloacid dehalogenase-like hydrolase, putative	3.444	0.73	2.61097	1206	2262	2109	13.9807	0.674326	0.420832	2.22314	2716.38	283.034
Tb927.4.2430	Endonuclease/Exonuclease/phosphatase family, putative	1.962	0.725	3.05344	1880	3564	3552	39.3968	0.682979	1.18588	2.49997	3768.55	983.985
Tb927.4.2450	protein disulfide isomerase 1	1.233	0.755	18.5185	10208	15680	17284	305.688	0.721688	9.20152	4.22615	16302.7	19538.1
Tb927.4.2600	hypothetical protein, conserved	4.884	0.715	2.45549	1846	2931	3276	14.3603	0.648701	0.432261	1.57046	1030.16	156.075
Tb927.4.2630	ATP-dependent DEAD/H RNA helicase, putative	2.529	0.738	1.97472	1588	3074	2960	25.8913	0.690292	0.779354	2.76064	4969.85	772.28
Tb927.4.2670	pyroglutamyl-peptidase I, putative	0.666	0.708	5.97907	1377	2079	2111	73.277	0.683517	2.20571	2.5183	3846.16	1854.28
Tb927.4.2700	Hydroxymethylglutaryl-CoA lyase, mitochondrial, putative	1.293	0.698	4.62963	2062	3459	3252	59.1589	0.663887	1.78074	1.92965	1830.01	929.569
Tb927.4.2740	p25-alpha, putative	0.45	0.774	30.9051	8095	12378	12818	645.587	0.753875	19.4328	6.53944	55103.4	90132.3
Tb927.4.2750	hypothetical protein, conserved	0.897	0.718	8.88889	1139	1875	2064	49.0224	0.689587	1.47562	2.73439	4839.11	1437.43
Tb927.4.2760	Protein of unknown function (DUF3808), putative	2.016	0.709	5.94354	3861	6912	6619	74.7016	0.666404	2.24859	1.99667	2012.88	1247.76
Tb927.4.2840	hypothetical protein, conserved	0.747	0.765	13.3333	2132	3312	3754	107.045	0.739071	3.22216	5.34982	31471.1	10433.4
Tb927.4.2880	Nucleoporin NUP225	6.21	0.725	2.7362	7839	13575	14343	49.8443	0.65024	1.50036	1.6036	1091.96	562.36
Tb927.4.2920	hypothetical protein, conserved	2.898	0.726	4.1365	4045	7053	6931	53.9758	0.674929	1.62472	2.24142	2779.12	1108.85
Tb927.4.3060	hypothetical protein, conserved	0.444	0.708	22.3714	2433	3675	4123	200.486	0.68801	6.03482	2.67652	4558.82	5657.87
Tb927.4.3160	dihydroxyacetone phosphate acyltransferase, putative	3.726	0.714	2.94985	2560	4663	4573	27.3526	0.656091	0.82334	1.73604	1362.55	355.697
Tb927.4.3300	mitochondrial ATP-dependent zinc metallopeptidase, putative	2.157	0.723	6.01852	2792	4389	4501	47.3917	0.67894	1.42654	2.36671	3234.5	1073.13
Tb927.4.3310	TPR repeat/SET domain containing protein, putative	2.019	0.731	1.97824	2350	4290	4323	46.8114	0.688373	1.40907	2.68972	4621.79	1332.73
Tb927.4.3320	uracil phosphoribosyltransferase, putative	0.72	0.7	20.7469	1892	2929	3000	94.9537	0.674544	2.8582	2.22973	2738.9	1932.51
Tb927.4.3350	Carnosine N-methyltransferase, putative	1.251	0.781	6.37959	2889	4623	4970	86.8459	0.747446	2.61415	5.99331	43203.7	10372.7
Tb927.4.3380	myosin IB heavy chain, putative	3.501	0.73	2.28311	5346	8927	8873	57.6	0.673867	1.73382	2.20935	2669.63	1153.18
Tb927.4.3400	hypothetical protein, conserved	1.815	0.716	6.05061	3439	6015	5731	72.6266	0.675583	2.18613	2.26138	2848.75	1515.87
Tb927.4.3540	hypothetical protein, conserved	1.137	0.762	4.38596	1541	2425	2370	48.8157	0.730011	1.4694	4.73119	22337.2	3818.6
Tb927.4.3550	60S ribosomal protein L13a, putative	1.026	0.824	20.9268	16132	25332	25472	877.726	0.793613	26.4204	11.21	247831	321511
Tb927.4.3560	protein phoshatase 1, putative	0.978	0.719	7.13558	2146	3706	3741	84.905	0.689332	2.55572	2.72494	4792.62	2474.21
Tb927.4.360	1,2-Dihydroxy-3-keto-5-methylthiopentene dioxygenase, putative	0.84	0.719	13.0486	3557	5774	6012	158.815	0.691505	4.7805	2.80644	5203.27	4878.66
Tb927.4.3620	serine threonine-protein phosphatase PP1, putative	0.882	0.728	4.51977	1487	2676	2674	66.824	0.699826	2.01147	3.14173	7128.7	2512.24
Tb927.4.3680	protein phosphatase 2C, putative	0.837	0.736	4.7619	1091	1789	1788	48.5383	0.708554	1.46105	3.53655	9918.24	2255.41
Tb927.4.3740	flagellar attachment zone protein 1	5.076	0.754	11.0258	15581	25316	27813	117.713	0.68641	3.54327	2.61907	4291.03	3195.4
Tb927.4.3790	ubiquitin carboxyl-terminal hydrolase, putative	1.395	0.7	8.58369	4138	6209	6736	107.304	0.664567	3.22996	1.94753	1877.7	1714.15
Tb927.4.380	WD domain, G-beta repeat, putative	0.999	0.711	4.99002	668	1064	1186	25.3736	0.681015	0.763772	2.43427	3498.71	604.241
Tb927.4.3810	DNA-directed RNA polymerase II subunit 2, putative	3.57	0.74	9.79569	4873	8006	8299	51.666	0.683317	1.5552	2.51146	3817.07	1301.06
Tb927.4.3840	nucleolar protein, putative	1.575	0.71	5.17241	2107	3428	3695	50.9376	0.67235	1.53327	2.16436	2520.73	982.927
Tb927.4.3850	NLE (NUC135) domain/WD domain, G-beta repeat, putative	1.359	0.738	5.1395	1400	2327	2397	39.1574	0.703027	1.17868	3.28116	8046.74	1591.09
Tb927.4.3890	ATP-dependent RNA helicase, putative	3.279	0.737	7.61731	5063	8834	9146	60.8206	0.682676	1.83076	2.48973	3725.65	1507.95
Tb927.4.3920	CRAL/TRIO domain containing protein, putative	3.237	0.715	1.23457	2654	4822	4785	32.7121	0.661025	0.984668	1.85618	1642.19	479.513
Tb927.4.3950	cytoskeleton-associated protein CAP5.5, putative	2.559	0.737	8.58704	3792	6360	6676	57.094	0.689009	1.71859	2.71305	4734.5	1650.8
Tb927.4.4040	hypothetical protein, conserved	0.777	0.684	12.8205	4533	7272	7301	214.402	0.657556	6.45373	1.77086	1440.18	2889
Tb927.4.4060	hypothetical protein, conserved	2.829	0.719	1.41243	1452	2335	2450	19.229	0.668541	0.578811	2.05538	2182.39	338.285
Tb927.4.4070	mevalonate kinase, putative	0.987	0.728	13.1313	1647	2774	2708	62.79	0.698196	1.89004	3.07304	6702.35	2269.01
Tb927.4.410	CAF 40	0.948	0.714	13.6698	2592	4445	4648	106.577	0.68479	3.20807	2.56216	4035.96	2781.58
Tb927.4.4150	mitochondrial RNA binding complex 1 subunit MRB4150	2.802	0.725	4.27807	2338	3970	3969	31.8825	0.674782	0.959696	2.23695	2763.71	652.644
Tb927.4.4210	ATP-dependent zinc metalloprotease AFG3-like, putative	2.631	0.736	6.07441	2842	5015	5098	42.5943	0.687339	1.28213	2.65227	4444.52	1182.62
Tb927.4.430	proteasome beta 7 subunit	0.654	0.698	12.1766	2920	4765	5120	169.703	0.673739	5.10823	2.20551	2656.71	3386.98
Tb927.4.4310	Nucleoporin NUP64	1.869	0.719	3.20513	3656	5437	5842	70.1623	0.677987	2.11196	2.33631	3119.92	1552.41
Tb927.4.4350	emp24/gp25L/p24 family/GOLD, putative	0.609	0.753	9.80392	1734	2770	2780	104.227	0.729588	3.13733	4.70416	21983	8069.95
Tb927.4.4360	monoglyceride lipase, putative	0.93	0.714	5.35906	1294	2093	2094	51.3837	0.685069	1.5467	2.57186	4078.73	1350.18
Tb927.4.4370	hypothetical protein, conserved	1.77	0.722	2.41984	1527	2687	2627	33.4872	0.682088	1.008	2.46994	3643.62	818.489
Tb927.4.4380	Pyrophosphate-energized vacuolar membrane proton pump 1	2.478	0.789	10.4796	10289	16104	17304	154.037	0.741775	4.63666	5.54964	34861.1	16032
Tb927.4.4490	multidrug resistance protein E	5.277	0.726	6.25	4805	8654	9029	36.7619	0.657085	1.10657	1.75959	1414.74	489.724
Tb927.4.450	coatomer alpha subunit, putative	3.576	0.716	12.8528	6008	9741	10175	63.2026	0.659269	1.90246	1.8125	1536.63	887.799
Tb927.4.4570	hypothetical protein, conserved	2.706	0.695	2.58398	3719	6101	6057	51.2054	0.64565	1.54133	1.50681	917.867	516.803
Tb927.4.4600	mitochondrial ribosomal protein l43	0.78	0.721	6.3857	982	1705	1657	48.2311	0.694505	1.4518	2.92299	5828.76	1593.54
Tb927.4.4650	diphthine synthase, putative	0.807	0.727	8.64198	1489	2594	2589	71.4927	0.70005	2.152	3.15131	7189.51	2702.45
Tb927.4.4660	Protein of unknown function DUF84, putative	0.543	0.652	10.989	1214	1814	1951	80.1505	0.629893	2.41261	1.21687	505.659	551.831
Tb927.4.4690	hypothetical protein, conserved	0.834	0.733	17.9211	3803	5950	6240	167.327	0.705603	5.03672	3.39781	8870.46	7237.71
Tb927.4.470	snoRNP protein GAR1, putative	0.687	0.683	8.69565	1350	2265	2468	76.4855	0.658134	2.30229	1.78482	1472.05	1045.19
Tb927.4.4700	hypothetical protein, conserved	0.807	0.753	23.4568	5878	8988	9728	266.115	0.72605	8.01031	4.48373	19228.3	18908.5
Tb927.4.4730	amino acid transporter, putative	1.419	0.778	4.21941	3407	5482	6112	91.8159	0.742263	2.76375	5.58653	35511.3	9670.08
Tb927.4.4910	3,2-trans-enoyl-CoA isomerase, mitochondrial precursor, putative	1.2	0.752	3.53857	2433	3930	4151	76.2473	0.719137	2.29512	4.08242	14802.6	4580.7
Tb927.4.4990	ubiquinol-cytochrome c reductase, putative	0.213	0.812	23.1481	890	1415	1304	147.016	0.798154	4.42531	11.9223	294300	60128.7
Tb927.4.5200	Nucleoporin NUP62	1.923	0.712	2.07684	2117	3520	3573	41.6735	0.670398	1.25441	2.10781	2341.26	766.947
Tb927.4.5310	Repressor of differentiation kinase 2	1.32	0.722	5.29101	1634	2812	3072	49.1656	0.687533	1.47993	2.65925	4477.21	1371.51
Tb927.4.5340	Flagellum attachment zone protein 11	2.505	0.702	2.79107	2385	3909	3907	35.5279	0.654518	1.06942	1.6994	1283.82	444.7
Tb927.4.560	Cytoplasmic dynein 2 heavy chain (DYNC2H1), putative	12.696	0.739	9.37082	16104	28449	30423	50.9997	0.632106	1.53514	1.25394	549.806	370.501
Tb927.4.590	PQQ-like domain/Protein of unknown function (DUF1620), putative	2.454	0.714	9.36101	6736	11763	12258	108.396	0.667004	3.26283	2.01298	2059.1	1837.12
Tb927.4.600	Alpha/beta hydrolase family, putative	0.951	0.703	12.5786	1525	2485	2428	59.0494	0.673744	1.77745	2.20567	2657.24	1178.67
Tb927.4.620	hypothetical protein, conserved	7.509	0.705	0.665602	2641	4744	4903	14.1293	0.622792	0.425305	1.10514	386.518	81.8766
Tb927.4.660	hypothetical protein, conserved	2.061	0.729	5.81395	3064	5310	5403	57.9116	0.685931	1.7432	2.60212	4214.02	1553.9
Tb927.4.730	Peptidase family C78, putative	1.476	0.71	3.38066	1003	1801	1908	27.4873	0.673553	0.827394	2.19995	2638.07	546.124
Tb927.4.750	50S ribosomal protein L7Ae, putative	0.435	0.743	11.4155	2101	3306	3459	177.174	0.723214	5.33312	4.31452	17271.6	11751.4
Tb927.4.760	AP-1 adapter complex gamma subunit, putative	2.403	0.756	12.4688	7555	12174	13031	118.737	0.709495	3.57411	3.582	10277.9	5644.87
Tb927.4.860	hypothetical protein, conserved	0.9	0.726	6.64452	1413	2349	2337	58.9206	0.69754	1.77357	3.04581	6538	2095.54
Tb927.4.870	dynein heavy chain, putative	13.344	0.747	4.56522	8987	15680	17832	26.555	0.637412	0.799331	1.3475	672.048	219.434
Tb927.4.890	small nuclear ribonucleoprotein sm d3	0.345	0.788	11.4943	828	1343	1296	87.2713	0.770379	2.62695	8.17998	102890	18187.8
Tb927.4.920	TPR repeat, putative	0.759	0.74	10.4987	2311	4082	4279	121.097	0.713864	3.64514	3.80066	12125.3	6401.1
Tb927.5.1000	ubiquitin-conjugating enzyme E2, putative	0.444	0.816	17.8971	10483	16321	17787	872.3	0.79601	26.2571	11.5805	271364	338671
Tb927.5.1060	mitochondrial processing peptidase, beta subunit, putative	1.467	0.749	18.3673	3292	5657	5766	86.918	0.712664	2.61632	3.73931	11587.2	4462.55
Tb927.5.1090	threonyl-tRNA synthetase, putative	2.397	0.765	22.9167	9994	15936	17954	159.21	0.718553	4.79237	4.05024	14479.4	9430.34
Tb927.5.1100	peroxisome targeting signal 1 receptor	1.965	0.745	7.62195	7110	11759	12762	139.68	0.702946	4.2045	3.27757	8022.21	5664.52
Tb927.5.1120	Phage tail fibre repeat, putative	18.186	0.736	0.274891	5480	9101	11430	12.3297	0.608065	0.371137	0.905039	221.392	49.9731
Tb927.5.1140	choline/ethanolamine kinase	1.974	0.746	4.23953	4487	7823	7553	87.3342	0.70385	2.62885	3.31799	8301.3	3620.28
Tb927.5.1160	Degradation arginine-rich protein for mis-folding, putative	0.684	0.82	23.2897	11407	18332	19349	623.723	0.795189	18.7747	11.4522	263061	237381
Tb927.5.1210	short-chain dehydrogenase, putative	0.933	0.752	20.2991	15577	24857	26552	624.802	0.723022	18.8072	4.30334	17147.1	41249.1
Tb927.5.1230	hypothetical protein, conserved	1.449	0.69	10.3306	2649	4420	4484	69.3165	0.653888	2.0865	1.68492	1253.55	854.448
Tb927.5.1250	GAF domain/TIP41-like family, putative	1.728	0.735	8.08781	4604	8195	7931	103.863	0.695564	3.12638	2.96529	6067.12	3520.99
Tb927.5.1260	Sulfate transporter N-terminal domain with GLY motif/Sulfate transporter family, putative	1.719	0.724	7.54936	1031	1878	2301	25.8825	0.684667	0.779089	2.55787	4017.13	673.489
Tb927.5.1270	Acidic leucine-rich nuclear phosphoprotein 32 family member	0.645	0.733	7.71605	1620	2547	2624	91.8098	0.708906	2.76356	3.55352	10051.5	4302.78
Tb927.5.1280	alanine racemase, putative	0.771	0.745	12.9199	2028	3260	3229	96.3607	0.718658	2.90055	4.056	14536.9	5722.19
Tb927.5.1300	V-type proton ATPase subunit a, putative	2.349	0.751	10.2041	7309	13029	14150	126.451	0.705021	3.8063	3.37108	8677.17	5392.85
Tb927.5.1360	nucleoside 2-deoxyribosyltransferase	0.459	0.749	15.1515	3805	5941	6139	301.393	0.728675	9.07224	4.64625	21236.3	22824.3
Tb927.5.1460	Possible lysine decarboxylase, putative	0.978	0.764	13.2518	8993	14961	15782	352.302	0.734332	10.6046	5.01675	26304.6	30606.3
Tb927.5.1470	NADH-cytochrome b5 reductase, putative	0.882	0.684	13.5593	2816	4312	4627	116.448	0.655826	3.50521	1.72979	1348.91	1504.57
Tb927.5.1490	Eukaryotic translation initiation factor 4 gamma 1	3.354	0.739	2.97885	716	1390	1190	8.48639	0.684058	0.255449	2.53684	3925.68	217.586
Tb927.5.1520	ATP-dependent protease ATPase subunit HslU1	1.425	0.752	13.3053	4262	7150	7804	116.738	0.716188	3.51393	3.92237	13239.9	6528.83
Tb927.5.1560	ATP-dependent DEAD/H RNA helicase, putative	2.259	0.721	2.21043	2199	3975	3898	38.5319	0.67591	1.15985	2.27143	2884.18	810.646
Tb927.5.1630	hypothetical protein, conserved	0.477	0.693	10.4167	2090	3264	3493	161.268	0.67228	4.85433	2.16231	2514.07	3106.67
Tb927.5.1660	protein phosphatase 2C, putative	1.275	0.745	14.0845	7396	11897	12198	215.39	0.711125	6.48344	3.66208	10931.8	10653.1
Tb927.5.1680	hypothetical protein, conserved	5.253	0.716	1.71233	8042	14008	14050	59.5999	0.647242	1.79402	1.53969	974.837	625.22
Tb927.5.1690	hypothetical protein, conserved	1.386	0.736	5.0396	2959	4872	5215	81.7197	0.700681	2.45984	3.17841	7363.34	3136.74
Tb927.5.1700	replication Factor A 28 kDa subunit, putative	0.765	0.75	14.3229	3071	4975	5040	148.918	0.723761	4.48259	4.34665	17632.8	10009.3
Tb927.5.1710	ATP synthase F(0) complex subunit B, mitochondrial, putative	0.564	0.767	21.164	5145	7724	8461	330.157	0.74447	9.93805	5.75625	38603.4	36685.5
Tb927.5.1730	Ecotin-like protein	0.495	0.707	14.0562	3529	5841	6022	269.275	0.685893	8.10545	2.60077	4207.92	7218.53
Tb927.5.1780	hypothetical protein, conserved	1.401	0.757	11.396	6032	10450	10803	168.484	0.721491	5.07153	4.21487	16181.7	10717.3
Tb927.5.1810	lysosomal/endosomal membrane protein p67	1.977	0.771	12.6263	45073	74237	77527	866	0.728818	26.0675	4.65528	21351.6	65809.7
Tb927.5.1880	inhibitor of serine peptidase (ISP), putative	0.462	0.774	12.9032	4629	7674	8107	381.872	0.753609	11.4947	6.51584	54550.5	52970.4
Tb927.5.1900	hypothetical protein, conserved	2.046	0.748	7.63775	7456	12449	13059	156.399	0.705088	4.70776	3.37419	8699.46	6681.05
Tb927.5.1930	signal peptidase subunit, putative	0.645	0.733	15.4321	8687	14062	14540	502.455	0.708906	15.1244	3.55352	10051.5	23548.2
Tb927.5.1940	hypothetical protein, conserved	0.573	0.707	10.4167	2811	4692	4565	182.893	0.684291	5.50527	2.54487	3960.41	4715.86
Tb927.5.2080	GMP reductase	1.473	0.755	19.6477	4043	6659	7184	105.388	0.71859	3.17228	4.05225	14499.5	6247.91
Tb927.5.2090	kinesin, putative	3.264	0.737	7.95837	9850	17013	16852	116.284	0.6828	3.50026	2.49393	3743.22	2891.8
Tb927.5.2140	regulator of nonsense transcripts 1	2.526	0.671	4.74496	4336	7781	8146	69.1711	0.62332	2.08212	1.11307	394.31	405.999
Tb927.5.2290	ATP-dependent RNA helicase, putative	6.711	0.714	1.63837	7626	13449	13852	45.0258	0.636283	1.35532	1.32704	643.957	362.012
Tb927.5.2320	Mak10 subunit, NatC N(alpha)-terminal acetyltransferase, putative	2.208	0.723	12.664	8453	14328	15443	149.912	0.678422	4.51249	2.35014	3171.74	3352.17
Tb927.5.2380	hydrolase, alpha/beta fold family, putative	0.936	0.702	5.32481	3111	4955	5151	123.081	0.672976	3.70487	2.18281	2581.1	2411.41
Tb927.5.2410	kinesin, putative	4.017	0.714	6.71642	9925	16564	16866	93.9361	0.653873	2.82757	1.68458	1252.83	1157.51
Tb927.5.2500	hypothetical protein, conserved	2.085	0.67	1.91571	2875	5102	4972	53.7846	0.626681	1.61897	1.165	447.792	342.529
Tb927.5.2530	RNA cytidine acetyltransferase	3.117	0.703	6.73077	4774	7993	8388	58.9495	0.650035	1.77444	1.59914	1083.5	661.78
Tb927.5.2560	hypothetical protein, conserved	0.219	0.766	18.018	760	1075	1132	118.317	0.751961	3.56146	6.37181	51252.7	15768.5
Tb927.5.2570	eukaryotic translation initiation factor 3 subunit b	2.088	0.731	17.2166	6811	10390	11823	121.364	0.68765	3.65317	2.6635	4497.19	3395.2
Tb927.5.2620	hypothetical protein, conserved	1.356	0.705	2.94334	943	1582	1858	27.8751	0.670066	0.839068	2.09833	2311.99	508.881
Tb927.5.2640	nicotinamide/nicotinic acid mononucleotide adenylyltransferase	1.062	0.701	7.19424	1029	1873	1859	49.3372	0.670084	1.4851	2.09885	2313.58	901.086
Tb927.5.2660	NUC130/3NT domain/SDA1, putative	2.58	0.719	1.54859	4770	8400	8691	73.2482	0.670813	2.20484	2.1197	2378.28	1361.67
Tb927.5.2700	otubain cysteine peptidase, Clan CA, family C65, putative	0.804	0.724	7.43494	2677	4264	4574	124.571	0.6971	3.7497	3.02772	6430.22	4383.42
Tb927.5.2720	zinc finger protein ZPR1	1.413	0.707	4.9435	4910	8061	8354	131.285	0.671339	3.95182	2.13488	2426.1	2471.95
Tb927.5.2770	SET domain containing protein, putative	1.221	0.751	3.26797	4126	6419	7011	125.417	0.71785	3.77516	4.01181	14099.4	7303.02
Tb927.5.2780	mitochondrial DNA polymerase beta	1.221	0.76	15.5229	3320	5446	5745	103.266	0.72685	3.10841	4.53267	19819.5	7481.42
Tb927.5.2790	mitochondrial DNA polymerase beta-PAK	2.439	0.724	4.095	4646	7238	7615	69.9451	0.677148	2.10542	2.30989	3022.49	1516.42
Tb927.5.2820	Serine/threonine-protein kinase NEK6, putative	3.09	0.714	2.58649	3408	6168	5757	42.9924	0.661265	1.29411	1.86223	1657.16	633.886
Tb927.5.2850	radial spoke protein RSP2, putative	1.554	0.735	7.70713	9694	15480	16460	233.487	0.697602	7.0282	3.0484	6553.51	8316.74
Tb927.5.2890	AAA domain (dynein-related subfamily)/von Willebrand factor type A domain containing protein, putative	6.489	0.707	0.606612	6835	11457	13148	41.91	0.630579	1.26153	1.22825	518.956	293.393
Tb927.5.2900	histone deacetylase 4	1.758	0.703	2.27144	1811	3048	2912	38.5215	0.663223	1.15954	1.91235	1784.61	595.617
Tb927.5.2930	Mitochondrial ATP synthase subunit, putative	1.11	0.725	27.8527	6675	10539	11397	224.537	0.693393	6.7588	2.87925	5588.67	7221.14
Tb927.5.2940	stress-induced protein sti1, putative	1.65	0.753	32.0629	18810	29970	32615	429.551	0.714464	12.9299	3.83174	12404	23039.1
Tb927.5.2950	Component of motile flagella 3	2.337	0.712	12.3932	6496	10439	10955	104.072	0.666138	3.13268	1.98948	1992.72	1727.15
Tb927.5.2960	phosphoribosylpyrophosphate synthetase, putative	1.158	0.727	9.47459	6417	10431	10703	207.191	0.694717	6.23666	2.93141	5875.74	6880.89
Tb927.5.300	thymine-7-hydroxylase, putative	0.96	0.713	4.15369	1824	2866	2832	68.5783	0.683606	2.06427	2.52134	3859.1	1739.12
Tb927.5.3030	Intraflagellar transport protein 121	3.78	0.737	10.838	7450	13388	13691	78.8756	0.678673	2.37423	2.35817	3202.05	1774.53
Tb927.5.310	invariant surface glycoprotein, putative	1.221	0.691	3.26797	2650	4171	4387	80.1243	0.65785	2.41182	1.77795	1456.32	1087.4
Tb927.5.3110	Mitochondrial ribosomal protein L49	0.654	0.733	6.08828	1166	1696	1781	62.3775	0.708739	1.87762	3.54545	9987.99	2911.54
Tb927.5.3120	eukaryotic translation initiation factor 2 beta subunit, putative	0.939	0.716	14.862	3556	5475	5801	138.049	0.686929	4.15541	2.63758	4376.18	3794.99
Tb927.5.3170	ribose-phosphate pyrophosphokinase, putative	1.071	0.732	6.11621	1483	2286	2778	53.054	0.700953	1.59698	3.19015	7439.46	2049.91
Tb927.5.3220	signal peptidase type I, putative	0.624	0.693	12.7592	3661	5733	6248	218.012	0.669302	6.56239	2.0767	2246.12	3906.86
Tb927.5.3230	hypothetical protein, conserved	6.543	0.714	1.22212	5694	10394	9950	34.4256	0.637262	1.03624	1.34477	668.256	283.441
Tb927.5.3250	hypothetical protein, conserved	4.671	0.603	2.99529	5875	10355	10082	48.8589	0.538163	1.4707	0.350687	15.7217	36.292
Tb927.5.3260	WD domain, G-beta repeat, putative	4.197	0.717	4.04762	4058	7211	7003	37.7312	0.65554	1.13575	1.72311	1334.43	484.14
Tb927.5.3350	iron superoxide dismutase A, mitochondrial	0.714	0.758	8.3682	2343	3731	3900	121.608	0.73265	3.66053	4.90364	24683.2	10142.2
Tb927.5.3360	mitochondrial ribosomal protein L2	1.233	0.701	4.85437	1536	2570	2455	46.3674	0.667688	1.39571	2.03173	2113.05	798.996
Tb927.5.3400	calcium-translocating P-type ATPase	3.033	0.755	16.1397	10010	16359	18567	128.495	0.702753	3.86783	3.269	7963.85	5186.59
Tb927.5.3410	Mitochondrial ribosomal protein L9	0.789	0.702	5.05051	984	1531	1569	45.2375	0.675352	1.36169	2.25431	2823.94	938.921
Tb927.5.3430	ubiquitin-activating enzyme E1, putative	2.388	0.692	2.09118	2084	3909	3754	35.178	0.645641	1.05889	1.50661	917.53	354.959
Tb927.5.3450	eukaryotic translation initiation factor eIF2A, putative	1.581	0.705	8.20707	3500	5454	6158	83.2621	0.667279	2.50627	2.02049	2080.59	1420.58
Tb927.5.3510	structural maintenance of chromosome 3 , putative	3.597	0.685	7.5	4472	7244	8285	48.2581	0.628103	1.45262	1.18767	472.533	318.121
Tb927.5.3560	vesicle-associated membrane protein, putative	0.648	0.732	15.361	2299	3806	3849	133.338	0.70785	4.0136	3.50298	9657.81	6090.91
Tb927.5.3580	phosphoglycerate mutase protein, putative	0.555	0.703	10.7527	629	1205	1170	46.3343	0.680651	1.39471	2.42226	3450.79	1093.67
Tb927.5.3600	ATP-dependent DEAD/H RNA helicase, putative	2.844	0.725	2.03004	2353	4282	4052	32.5154	0.674408	0.978746	2.2256	2724.78	659.568
Tb927.5.3610	adaptor complex protein (AP) 3 delta subunit 1, putative	3.381	0.708	2.65957	3586	6491	6237	41.7524	0.652838	1.25679	1.66109	1204.71	501.718
Tb927.5.3640	Mitochondrial SSU ribosomal protein, putative	0.81	0.705	4.92005	475	839	733	21.9589	0.678	0.660985	2.33673	3121.5	486.019
Tb927.5.3710	Inositol phosphosphingolipids phospholipase C	1.74	0.697	2.86862	3895	6228	6990	85.4797	0.657427	2.57302	1.76778	1433.19	1148.22
Tb927.5.3800	glutamine hydrolysing (not ammonia-dependent) carbomoyl phosphate synthase, putative	5.499	0.737	15.9942	10036	16667	18054	70.6709	0.66665	2.12727	2.00334	2031.7	1187.5
Tb927.5.3810	orotidine-5-phosphate decarboxylase/orotate phosphoribosyltransferase, putative	1.374	0.734	17.4292	3946	6387	7617	112.991	0.698835	3.40113	3.09979	6866.38	4146.92
Tb927.5.3820	aspartate carbamoyltransferase, putative	0.981	0.758	20.3252	2274	3346	3854	84.4549	0.728286	2.54218	4.62181	20926.2	6335.63
Tb927.5.3830	dihydroorotate oxidase	0.939	0.738	8.49257	3780	6236	6671	154.1	0.708929	4.63857	3.55462	10060.2	7226.13
Tb927.5.3900	Galactose oxidase, central domain/Domain of unknown function (DUF4110), putative	2.232	0.729	5.36913	3397	6134	6520	61.9162	0.68418	1.86374	2.54105	3943.87	1592.21
Tb927.5.3920	Peroxisome biogenesis factor 6	2.946	0.735	3.05188	1385	2290	2538	18.2904	0.683508	0.550558	2.51799	3844.84	462.736
Tb927.5.3970	adenylate kinase, putative	0.78	0.724	8.93997	1317	1897	1938	58.226	0.697505	1.75266	3.04438	6529.4	2069.09
Tb927.5.3980	mitochondrial ribosomal protein L15	1.122	0.686	3.55556	1168	1819	1838	37.6489	0.654223	1.13327	1.69259	1269.54	467.878
Tb927.5.4020	hypothetical protein	0.816	0.745	7.32601	423	772	621	19.3425	0.7179	0.582229	4.01453	14126	1127.68
Tb927.5.4040	Mitochondrial SSU ribosomal protein, putative	2.451	0.739	4.48248	2777	4758	4945	44.1292	0.692033	1.32833	2.82662	5308.35	1373.11
Tb927.5.4150	hypothetical protein, conserved	1.158	0.727	11.1972	2732	4078	4398	84.8475	0.694717	2.55399	2.93141	5875.74	2817.81
Tb927.5.4170	histone H4, putative	0.3	0.815	29.703	3287	5281	5867	414.781	0.798568	12.4853	11.9894	298945	171357
Tb927.5.4270	ATP-dependent DEAD/H RNA helicase, putative	2.484	0.708	2.01045	3151	5400	5287	48.4214	0.660718	1.45753	1.84847	1623.22	704.515
Tb927.5.4310	GTP-binding protein, putative	2.442	0.729	2.45399	2054	3515	3581	32.5093	0.682119	0.978561	2.471	3647.99	795.199
Tb927.5.4330	dihydrolipoamide branched chain transacylase, putative	1.317	0.721	10.6061	1258	2518	2668	41.6706	0.686572	1.25433	2.62482	4317.37	1135.63
Tb927.5.4350	Nudix hydrolase 2, putative	0.51	0.672	11.6959	711	1239	1188	53.1922	0.650576	1.60114	1.61091	1105.9	605.037
Tb927.5.4380	kinetoplastid-specific phospho-protein phosphatase, putative	1.908	0.713	12.0356	2987	4875	5620	61.2066	0.671561	1.84238	2.14131	2446.55	1158.67
Tb927.5.4390	hypothetical protein, conserved	0.405	0.733	12.2549	2742	4345	4660	251.498	0.713908	7.57035	3.80294	12145.6	13308.3
Tb927.5.440	trans-sialidase, putative	2.325	0.73	7.73196	1362	2205	2180	21.6033	0.684256	0.650281	2.54366	3955.19	556.565
Tb927.5.4400	hypothetical protein, conserved	1.296	0.695	3.84911	1791	3008	3024	52.4526	0.660847	1.57888	1.85172	1631.19	765.572
Tb927.5.4420	nucleolar RNA helicase II, putative	1.896	0.76	17.3776	5079	8213	8743	101.178	0.718691	3.04557	4.05784	14555.3	6013.14
Tb927.5.4460	major vault protein, putative	2.514	0.723	12.3162	3219	5427	5738	49.6298	0.675433	1.49391	2.25678	2832.6	1032.11
Tb927.5.4470	hypothetical protein, conserved	2.535	0.708	2.75808	2364	4173	4471	37.465	0.660235	1.12773	1.8364	1593.83	538.751
Tb927.5.4480	paraflagellar rod component par4, putative	1.737	0.719	21.2644	10940	17656	18680	237.037	0.679461	7.13505	2.38351	3298.97	5435.83
Tb927.5.4500	ras-like small GTPase, putative	0.582	0.739	18.8034	4577	7505	8074	299.832	0.716113	9.02523	3.9184	13202.5	16738.4
Tb927.5.4560	guanine deaminase, putative	1.548	0.754	10.3159	1739	2900	3143	43.5693	0.716674	1.31148	3.94834	13485.8	2465.65
Tb927.5.500	hypothetical protein, conserved	4.209	0.737	1.4245	2765	4672	4922	25.4811	0.675452	0.767005	2.25737	2834.67	530.156
Tb927.5.520	stomatin-like protein, putative	1.593	0.729	10.0251	1791	2947	3147	42.9934	0.691136	1.29414	2.79243	5131.17	1308.95
Tb927.5.550	V-type proton ATPase subunit D, putative	1.149	0.754	10.4167	2404	4070	4293	81.1428	0.721843	2.44248	4.23503	16398.4	5205.76
Tb927.5.570	hypothetical protein, conserved	6.381	0.705	0.783208	7031	12907	13411	45.0111	0.629218	1.35488	1.20578	492.901	304.86
Tb927.5.580	prefoldin subunit, putative	0.405	0.719	22.0588	3246	4995	5056	286.437	0.699908	8.62205	3.14525	7151	10790.2
Tb927.5.590	protein phosphatase 1, regulatory subunit, putative	1.209	0.716	5.77558	3145	5080	5182	96.6756	0.683014	2.91003	2.50116	3773.55	2416.65
Tb927.5.630	acidic phosphatase, putative	1.203	0.719	13.267	16683	26640	27942	516.341	0.686096	15.5424	2.60792	4240.28	13909.9
Tb927.5.760	cell cycle sequence binding phosphoprotein (RBP33), putative	2.22	0.738	3.1489	3615	6075	6487	63.1882	0.693301	1.90203	2.87566	5569.24	2027.6
Tb927.5.780	hypothetical protein, conserved	1.56	0.719	3.83877	4305	7278	7578	106.515	0.68153	3.2062	2.45133	3567.55	2568.42
Tb927.5.890	oligosaccharyl transferase subunit, putative	2.403	0.725	3.74065	11104	18399	21533	183.6	0.678495	5.52654	2.35248	3180.54	4112.77
Tb927.5.900	oligosaccharyl transferase subunit, putative	2.463	0.733	4.05515	7610	12927	14591	123.21	0.685918	3.70876	2.60165	4211.9	3304.94
Tb927.5.930	NADH-dependent fumarate reductase	3.426	0.773	9.33217	3367	5445	6024	37.6521	0.717472	1.13337	3.99126	13898.8	2172.43
Tb927.5.940	NADH-dependent fumarate reductase, putative	2.631	0.74	4.92611	3540	5765	6139	55.2395	0.691339	1.66276	2.80014	5170.76	1690.1
Tb927.5.950	monothiol glutaredoxin, putative	0.666	0.702	13.4529	2177	3294	3696	120.003	0.677517	3.6122	2.32149	3065.02	2625.1
Tb927.5.960	atpase family aaa domain-containing protein 1	1.005	0.704	5.95238	2820	4593	4982	107.039	0.673925	3.22197	2.21109	2675.49	2145.98
Tb927.5.980	2OG-Fe(II) oxygenase superfamily, putative	0.915	0.697	4.3573	1922	3492	3530	84.1469	0.668303	2.5329	2.04876	2162.84	1471.83
Tb927.6.1080	hydroxyacylglutathione hydrolase, putative	0.888	0.731	12.3457	1646	2611	2909	70.1074	0.70273	2.1103	3.26796	7956.74	2828.2
Tb927.6.1090	proteasome regulatory ATPase subunit 3	1.209	0.713	18.1518	4402	6793	7747	136.466	0.680014	4.10776	2.40143	3368.63	3171.72
Tb927.6.1260	proteasome beta-1 subunit, putative	0.846	0.733	11.7786	1806	2796	3040	78.7663	0.705407	2.37094	3.38877	8804.79	3390.82
Tb927.6.1280	translation initiation factor EIF-2b alpha subunit, putative	0.978	0.697	5.55556	1432	2357	2526	61.048	0.667332	1.8376	2.02195	2084.78	1042.92
Tb927.6.1290	hypothetical protein, conserved	2.697	0.685	5.92593	2154	3534	3783	30.5313	0.635732	0.919021	1.31716	630.675	242.214
Tb927.6.1430	hypothetical protein, conserved	2.307	0.744	4.7619	2407	4115	4302	40.657	0.698434	1.22381	3.08297	6762.96	1477.71
Tb927.6.1440	LSU ribosomal protein, mitochondrial, putative	0.906	0.752	5.14801	802	1250	1408	38.8669	0.723445	1.16993	4.32807	17423.3	2592.42
Tb927.6.1470	hypothetical protein, conserved	0.669	0.7	16.369	3566	5515	5941	195.731	0.675462	5.89168	2.25767	2835.72	4073.32
Tb927.6.1500	alkyl-dihydroxyacetone phosphate synthase	1.839	0.724	8.68621	3988	6787	7306	85.0878	0.683317	2.56123	2.51147	3817.13	2142.71
Tb927.6.1520	Aquaglyceroporin 1	0.963	0.737	6.21118	4263	6992	7025	165.237	0.70756	4.9738	3.48922	9552.34	7495.07
Tb927.6.1530	Glutamine amidotransferase class-I, putative	0.942	0.712	7.40741	2077	3158	3061	77.4302	0.682883	2.33073	2.49673	3754.94	1929.43
Tb927.6.1570	2-hydroxy-3-oxopropionate reductase, putative	0.9	0.731	15.5039	3897	6308	6830	164.336	0.70254	4.94666	3.25953	7899.63	6598.89
Tb927.6.1660	hypothetical protein, conserved	1.71	0.73	6.42148	2274	3644	3671	48.9946	0.69077	1.47478	2.77861	5060.63	1478.47
Tb927.6.1730	hypothetical protein, conserved	3.828	0.715	1.8272	3655	6445	6341	37.227	0.656304	1.12057	1.74106	1373.57	486.612
Tb927.6.1770	kinesin, putative	1.884	0.73	11.1288	5692	9292	9683	113.992	0.688822	3.43128	2.70618	4701.12	3281.02
Tb927.6.1780	mitogen activated protein kinase 4, putative	1.233	0.693	4.85437	1167	2037	2078	37.0445	0.659688	1.11508	1.82282	1561.17	525.677
Tb927.6.1800	protein phosphatase 2C, putative	1.146	0.727	17.4064	583	687	1114	18.2708	0.694885	0.54997	2.93809	5913.14	609.255
Tb927.6.1810	Alpha/beta hydrolase family, putative	1.239	0.67	3.22061	1158	2023	2039	36.4509	0.636607	1.09721	1.33288	651.892	295.381
Tb927.6.1830	Cleavage stimulation factor subunit 50, putative	1.326	0.739	3.00978	2950	4586	4647	80.4746	0.704454	2.42237	3.34529	8493.23	3385.21
Tb927.6.1860	conserved protein	1.026	0.667	7.27273	820	1316	1229	35.8286	0.636613	1.07848	1.33298	652.031	290.378
Tb927.6.1870	Eukaryotic translation initiation factor 4E-4	1.281	0.737	8.56698	3459	5649	5935	102.118	0.703046	3.07386	3.28198	8052.37	4151.25
Tb927.6.1880	aspartyl-tRNA synthetase, putative	1.68	0.765	17.8253	2157	3636	4064	50.7229	0.726116	1.52681	4.48772	19276.1	3609.81
Tb927.6.1900	essential nuclear protein 1, putative	1.425	0.746	5.60224	1927	3106	3419	51.5389	0.710188	1.55137	3.61582	10550.9	2491.76
Tb927.6.1920	hypothetical protein, conserved	1.17	0.703	6.82012	1806	2923	2990	57.4907	0.67055	1.73053	2.11216	2354.74	1061.95
Tb927.6.1950	N-acetyltransferase B complex (NatB) non catalytic subunit, putative	2.586	0.729	5.79374	2212	4075	4042	34.439	0.680757	1.03665	2.42576	3464.7	814.997
Tb927.6.1990	hypothetical protein, conserved	0.972	0.729	8.20513	2243	3681	3659	85.8636	0.699423	2.58458	3.12462	7020.94	3196.64
Tb927.6.2010	acyl-CoA synthetase, putative	1.569	0.743	10.1781	2590	4263	4328	62.0509	0.705422	1.86779	3.38949	8809.97	2672.24
Tb927.6.2020	Bardet-Biedl syndrome 2 protein	2.208	0.71	1.78731	1923	3513	3335	34.3435	0.665422	1.03377	1.97024	1939.44	560.13
Tb927.6.2060	histidyl-tRNA synthetase	1.431	0.733	12.5523	1959	3197	3555	52.7998	0.697113	1.58933	3.02823	6433.26	1858.5
Tb927.6.2090	pdz domain containing protein, putative	2.13	0.718	4.68823	2782	4940	5133	52.1043	0.674216	1.56839	2.21984	2705.15	1052.03
Tb927.6.2140	hypothetical protein, conserved	0.801	0.694	6.21891	996	1765	1802	49.1185	0.66715	1.47852	2.01698	2070.52	835.431
Tb927.6.2170	co-chaperone GrpE, putative	0.666	0.723	22.4215	1772	2971	3041	101.268	0.698517	3.04827	3.08648	6784.43	3688.17
Tb927.6.2200	DJ-1 family protein, putative	0.591	0.772	20.202	1667	2739	2874	106.765	0.748937	3.21373	6.11578	45712	13221.9
Tb927.6.2210	hypothetical protein, conserved	3.384	0.706	7.38116	1976	3480	3769	23.5198	0.650813	0.707969	1.6161	1115.88	269.073
Tb927.6.2220	hypothetical protein, conserved	0.387	0.715	15.3846	664	1021	1026	61.1222	0.696337	1.83984	2.99655	6247.24	2111.32
Tb927.6.2230	RGG protein	2.325	0.704	7.96646	1812	3030	3205	30.044	0.658256	0.904355	1.78777	1478.85	411.775
Tb927.6.2250	rac serine-threonine kinase, putative	1.374	0.734	5.08351	1539	2506	2605	42.1299	0.698835	1.26815	3.09979	6866.38	1546.23
Tb927.6.2270	AdoMet dependent proline di-methyltransferase, putative	0.75	0.79	11.9522	980	1752	1765	51.673	0.764019	1.55541	7.50397	80884.7	9228.41
Tb927.6.2280	prefoldin subunit, putative	0.417	0.763	26.1905	336	590	644	32.2772	0.743627	0.971577	5.69083	37392	3513.88
Tb927.6.2390	conserved hypothetical protein, putative	1.716	0.703	5.81734	2049	3636	3325	45.5934	0.663701	1.37241	1.92479	1817.19	713.19
Tb927.6.2420	p22 protein precursor	0.681	0.723	14.6199	4132	6858	7052	229.768	0.698243	6.91623	3.07502	6714.41	8312.59
Tb927.6.2460	ubiquitin fusion degradation protein 2, putative	2.997	0.709	6	3743	6780	6831	49.9838	0.657064	1.50456	1.7591	1413.65	665.531
Tb927.6.2490	succinate dehydrogenase subunit 7	0.873	0.737	13.8313	1297	2186	2295	69.4306	0.70897	2.08993	3.55656	10075.6	3258.95
Tb927.6.2550	RNA-binding protein, putative	2.172	0.706	12.3457	2761	4634	4887	49.0698	0.661787	1.47705	1.87546	1690.22	732.719
Tb927.6.2640	importin alpha subunit, putative	1.599	0.727	9.98752	2865	5036	5168	70.6456	0.689065	2.1265	2.71508	4744.39	2045.37
Tb927.6.2650	nucleolar mif4g domain-containing protein 1	2.271	0.707	1.75901	1215	2156	2129	20.9631	0.66179	0.63101	1.87555	1690.45	313.052
Tb927.6.2690	ubiquitin carboxyl-terminal hydrolase, putative	1.917	0.674	5.72917	3788	6161	6408	74.3268	0.632463	2.23731	1.26003	557.296	544.675
Tb927.6.2710	hypothetical protein, conserved	2.283	0.711	4.8119	2754	4881	4464	46.0448	0.665671	1.38599	1.97692	1957.82	755.531
Tb927.6.2720	calcium-binding protein, putative	1.077	0.707	7.40741	2434	4299	4391	89.1716	0.675866	2.68415	2.27008	2879.41	1874.03
Tb927.6.2740	pyridoxal kinase	0.9	0.688	19.9336	5656	9505	9853	240.887	0.65954	7.25094	1.81916	1552.44	3406
Tb927.6.2780	U3 small nuclear ribonucleoprotein (snRNP), putative	0.861	0.695	8.10185	1117	2083	2162	53.3926	0.667163	1.60717	2.01732	2071.5	908.405
Tb927.6.2790	L-threonine 3-dehydrogenase, putative	0.996	0.792	23.023	7187	11546	12011	268.847	0.76206	8.09255	7.3072	75105.6	45784
Tb927.6.2840	Serine/threonine-protein kinase RIO2, putative	1.434	0.695	2.78358	2757	4386	4427	70.5191	0.659075	2.12269	1.80773	1525.39	985.92
Tb927.6.2860	WD domain, G-beta repeat, putative	1.365	0.689	10.2339	1507	2610	2648	42.9134	0.65395	1.29174	1.68635	1256.51	529.785
Tb927.6.2880	kinesin, putative	3.255	0.695	2.14856	3947	7003	6834	47.3381	0.640875	1.42492	1.41231	766.15	425.482
Tb927.6.2940	phosphopantothenoylcysteine decarboxylase, putative	0.753	0.68	9.25926	1882	3014	3210	93.5878	0.653967	2.81708	1.68674	1257.33	1155.87
Tb927.6.3040	small GTP-binding protein Rab28, putative	0.72	0.706	5.5325	1266	2212	2222	68.3848	0.680544	2.05845	2.41877	3436.93	1609.99
Tb927.6.3050	aldehyde dehydrogenase family, putative	1.629	0.681	7.96569	2388	3744	3903	53.8512	0.64271	1.62097	1.44791	821.239	506.072
Tb927.6.3090	microtubule associated protein xmap215	4.863	0.687	1.84957	5001	8236	8757	39.3387	0.620843	1.18414	1.07631	359.04	217.427
Tb927.6.3100	Intraflagellar transport complex B protein 46 C terminal, putative	1.305	0.721	9.93884	5968	9360	9914	168.866	0.686729	5.08304	2.63042	4343.13	4619.63
Tb927.6.3150	Hydin	13.563	0.699	1.91656	9231	15709	17691	27.1788	0.588516	0.818109	0.694254	105.664	68.5374
Tb927.6.3160	splicing factor 3a, putative	1.626	0.705	2.45549	2027	3453	3499	47.9174	0.666746	1.44236	2.00593	2039.05	807.033
Tb927.6.3210	Adenylate kinase, nuclear	0.675	0.717	9.3633	430	771	715	31.1567	0.692352	0.937848	2.8389	5372.91	977.011
Tb927.6.3220	hypothetical protein, conserved	3.237	0.712	1.23457	1976	2984	3089	21.8536	0.658025	0.657816	1.78217	1465.98	297.844
Tb927.6.3250	C2H2 type zinc-finger (2 copies), putative	0.969	0.673	4.11523	940	1633	1646	37.6663	0.643469	1.13379	1.46288	845.145	360.549
Tb927.6.3290	intraflagellar transport protein 20	0.39	0.738	17.8117	1669	2434	2577	149.921	0.719265	4.51278	4.08953	14874.7	9034.92
Tb927.6.3310	cysteine peptidase, Clan CA, family C2, putative	3.03	0.709	1.31883	2496	4175	4356	31.621	0.656779	0.951824	1.75231	1398.48	418.128
Tb927.6.3340	Domain of unknown function (DUF814), putative	0.624	0.678	7.97448	1246	1939	2241	75.4432	0.654302	2.27092	1.69441	1273.35	939.368
Tb927.6.3500	endosomal trafficking protein RME-8, putative	6.708	0.724	9.68559	12887	21979	22975	74.8028	0.646301	2.25164	1.52016	940.733	766.979
Tb927.6.3540	zinc-finger protein, conserved	1.098	0.719	5.44959	1023	1684	1668	34.7086	0.687564	1.04476	2.6604	4482.59	968.965
Tb927.6.3630	sphingosine 1-phosphate lyase, putative	1.614	0.687	6.80272	2542	4196	4487	60.3858	0.648887	1.81767	1.57443	1037.45	659.275
Tb927.6.3640	zinc finger of C3HC4-type, RING/B-box zinc finger, putative	1.683	0.662	7.11744	1854	3224	3101	42.1877	0.623081	1.26989	1.10947	390.76	246.188
Tb927.6.3650	ADP-ribosylation factor, putative	0.549	0.708	19.9275	3177	4899	5377	213.252	0.685772	6.41908	2.59649	4188.62	5699.86
Tb927.6.3670	paraflagellar rod component, putative	9.666	0.69	0.517117	5854	10774	10649	24.3587	0.596729	0.73322	0.776065	144.176	74.9784
Tb927.6.3740	heat shock 70 kDa protein, mitochondrial precursor, putative	1.971	0.791	31.4083	10781	18011	18376	208.08	0.748882	6.26341	6.11124	45617.4	25734.7
Tb927.6.3840	reticulon domain protein	0.558	0.769	17.8253	9470	14630	15897	624.049	0.74659	18.7845	5.92418	41827.8	73003.5
Tb927.6.3870	RNA-binding protein, putative	0.642	0.732	10.8527	2433	3702	3699	134.256	0.707963	4.04123	3.50831	9698.85	6149.54
Tb927.6.3890	replication factor C, subunit 2, putative	1.041	0.723	4.78927	1657	2857	2800	60.925	0.692391	1.8339	2.84039	5380.78	1912.28
Tb927.6.3940	Autophagy-related protein 27, putative	1.092	0.683	8.21918	2909	4708	4989	100.398	0.65165	3.02207	1.63456	1151.8	1172.16
Tb927.6.400	peptidase M20/M25/M40, putative	1.425	0.722	11.2045	4887	8033	8897	132.722	0.686188	3.99506	2.61119	4255.13	3583.47
Tb927.6.4000	small glutamine-rich tetratricopeptide repeat protein, putative	1.248	0.729	19.1847	5826	9220	9491	171.714	0.695486	5.16876	2.96214	6049.2	5810.12
Tb927.6.4010	Translation machinery associated TMA7, putative	0.156	0.725	25.1572	3483	5297	5566	792.477	0.713151	23.8543	3.76409	11802.6	41171.1
Tb927.6.4020	hypothetical protein, conserved	0.318	0.762	21.8069	1754	2666	2914	200.27	0.745083	6.02834	5.80427	39508.6	22586.5
Tb927.6.4090	chaperonin HSP60, mitochondrial precursor, putative	1.623	0.712	7.99508	2186	3888	3733	52.3326	0.673781	1.57526	2.20677	2660.93	1045.53
Tb927.6.410	hypothetical protein, conserved	2.574	0.712	1.55219	1392	2409	2453	21.0577	0.663869	0.633859	1.92918	1828.76	330.738
Tb927.6.4130	succinate dehydrogenase subunit 3	0.312	0.795	19.0476	1292	2079	1952	148.356	0.778243	4.46566	9.10067	138547	37420.9
Tb927.6.4140	paraflagellar rod component, putative	0.345	0.779	20.1149	8718	13651	14654	930.451	0.761379	28.0075	7.24001	73194.9	155856
Tb927.6.4200	LSU ribosomal protein, mitochondrial, putative	1.647	0.712	2.99625	1552	2687	2575	44.4162	0.673499	1.33697	2.19836	2632.74	881.328
Tb927.6.4210	aldehyde dehydrogenase, putative	1.785	0.701	10.6264	3176	5695	5476	69.559	0.660919	2.09379	1.85351	1635.61	1017.01
Tb927.6.4280	glyceraldehyde 3-phosphate dehydrogenase, glycosomal	1.077	0.852	30.5556	115543	176125	193201	3933.37	0.820866	118.398	16.2233	695028	2.79199e+06
Tb927.6.4320	Protein of unknown function (DUF2817), putative	1.197	0.749	10	6655	10801	11645	211.24	0.716178	6.35854	3.92183	13234.8	11811.1
Tb927.6.4340	U6 snRNA-associated Sm-like protein LSm5p	0.351	0.769	11.2994	1075	1804	1771	114.55	0.751226	3.44808	6.30866	49848.3	14996.7
Tb927.6.4370	eukaryotic translation initiation factor 3 subunit d	1.608	0.739	18.4089	5897	9403	9971	145.119	0.700958	4.36824	3.19035	7440.77	5607.79
Tb927.6.4380	Protein of unknown function (DUF544), putative	1.266	0.731	3.15209	1483	2446	2553	44.4909	0.697245	1.33922	3.03367	6465.55	1571.07
Tb927.6.4390	kinesin, putative	3.333	0.741	8.09353	4503	7654	8141	52.7808	0.68623	1.58875	2.6127	4261.97	1426.54
Tb927.6.4410	S-adenosylmethionine decarboxylase	1.11	0.716	6.28931	1043	1728	1732	35.294	0.684393	1.06238	2.54839	3975.73	912.304
Tb927.6.4440	RNA-binding protein 42 (RNA-binding motif protein 42)	1.056	0.789	12.2757	9003	14171	15374	318	0.758171	9.57211	6.93179	64829.6	49276.8
Tb927.6.4480	valyl-tRNA synthetase, putative	2.925	0.775	16.735	7116	12487	13523	97.733	0.723692	2.94186	4.34261	17587.1	6558.02
Tb927.6.4500	conserved repeat domain containing protein, putative	0.609	0.774	11.4379	9079	14869	16010	568.222	0.750588	17.104	6.25431	48659.4	73247.5
Tb927.6.4520	Tumour suppressor, Mitostatin, putative	1.308	0.724	12.2044	2841	4793	4956	83.4868	0.68969	2.51304	2.7382	4857.95	2454.11
Tb927.6.4530	RNA-binding protein, putative	0.459	0.737	8.65801	600	1095	1073	51.7978	0.716675	1.55916	3.94838	13486.2	2931.36
Tb927.6.4540	3-hydroxy-3-methylglutaryl-CoA reductase, putative	1.302	0.712	10.728	705	1374	1385	22.7679	0.677768	0.685337	2.3294	3094.27	501.101
Tb927.6.4550	hypothetical protein, conserved	2.271	0.716	4.15628	3261	6268	6210	59.495	0.67079	1.79086	2.11906	2376.26	1105.4
Tb927.6.4590	glutamyl-tRNA synthetase, putative	1.821	0.679	24.6277	5184	8613	9607	111.302	0.638517	3.35029	1.36785	700.742	944.733
Tb927.6.4610	Ankyrin repeats (3 copies), putative	1.239	0.7	4.83092	1977	3368	3077	59.2444	0.666607	1.78332	2.00216	2028.37	994.451
Tb927.6.4630	kinetoplastid-specific phospho-protein phosphatase, putative	1.332	0.704	5.44959	2736	4510	4694	94.4777	0.669376	2.84387	2.0788	2252.45	1696.14
Tb927.6.4650	UV excision repair RAD23 protein, putative	1.068	0.74	14.0056	3060	4889	5258	107.607	0.708997	3.23908	3.55787	10085.9	5054.21
Tb927.6.4670	MORN repeat-containing protein 1	1.074	0.722	23.2126	4819	7678	7907	165.736	0.69091	4.98881	2.78389	5087.49	5018.28
Tb927.6.4710	calmodulin, putative	2.019	0.728	2.4728	3177	5555	5602	61.4744	0.685373	1.85044	2.58247	4125.84	1627.27
Tb927.6.4740	importin-alpha re-exporter protein, putative	2.88	0.73	5.89664	2185	4107	4111	31.0722	0.679088	0.935305	2.37148	3252.73	706.136
Tb927.6.4750	hypothetical protein, conserved	1.872	0.725	4.8	3227	5678	5712	67.5669	0.683954	2.03383	2.53325	3910.19	1727.99
Tb927.6.4760	T-complex protein 11, putative	2.382	0.722	7.12788	2272	4131	4032	37.8475	0.675699	1.13925	2.26493	2861.21	792.174
Tb927.6.4770	protein mkt1, putative	2.205	0.736	15.3986	1794	2711	3475	31.4287	0.691452	0.946036	2.80445	5192.99	964.239
Tb927.6.4780	DNA ligase I, putative	2.238	0.709	2.85714	4189	6790	6776	69.2918	0.66412	2.08575	1.93576	1846.23	1094.97
Tb927.6.4800	hypothetical protein, conserved	1.254	0.714	6.36436	2503	4109	4241	75.2831	0.680405	2.2661	2.41422	3418.93	1766.44
Tb927.6.4840	S-adenosylmethionine synthetase, putative	1.191	0.778	25.9631	3882	6602	6952	126.731	0.74526	3.81473	5.81827	39774.9	14354.4
Tb927.6.4950	Protein mago nashi homolog	0.441	0.685	11.9048	1906	3019	3067	157.676	0.665078	4.74619	1.96106	1914.34	2550.23
Tb927.6.4960	Zinc finger CCCH domain-containing protein 47	0.939	0.743	5.08906	1040	1834	1756	51.1634	0.713929	1.54007	3.80404	12155.4	2708.77
Tb927.6.4970	serine/arginine-rich protein specific kinase SRPK, putative	2.169	0.686	9.2081	6370	10770	11305	113.742	0.641817	3.42373	1.43048	793.958	1045.98
Tb927.6.4980	40S ribosomal protein S14	0.432	0.801	22.9885	14127	23288	24090	1232.15	0.781282	37.089	9.48363	155430	334590
Tb927.6.4990	mitochondrial ATP synthase delta chain	0.546	0.722	20.0364	2244	3818	3857	157.11	0.699832	4.72915	3.14202	7130.56	5907.51
Tb927.6.5000	Protein of unknown function (DUF773), putative	1.182	0.668	3.37553	1354	2372	2389	44.7432	0.635384	1.34682	1.31095	622.417	351.974
Tb927.6.5070	hypothetical protein, conserved	1.362	0.725	24.1758	14091	22536	24324	389.536	0.689989	11.7254	2.74932	4913.21	11533.9
Tb927.6.5080	Protein of unknown function (DUF3808), putative	1.698	0.725	8.23045	4537	7566	7702	101.422	0.685908	3.05289	2.60129	4210.25	2719.81
Tb927.6.5090	hypothetical protein, conserved	2.457	0.718	1.62602	2177	3985	3598	34.42	0.670976	1.03608	2.12438	2392.96	642.393
Tb927.6.5110	damage-specific DNA binding protein, putative	3.81	0.699	1.04904	3066	5860	5539	32.6979	0.640442	0.984239	1.40405	753.705	290.822
Tb927.6.5120	60S acidic ribosomal protein P2, putative	0.321	0.782	27.7778	8137	12854	14110	945.507	0.765003	28.4607	7.60476	83952	172941
Tb927.6.560	cysteine peptidase C (CPC)	1.02	0.78	3.91007	12948	20846	22361	478.679	0.749701	14.4087	6.17952	47053.5	60390.6
Tb927.6.600	ccr4-not transcription complex subunit	1.053	0.736	8.52273	315	711	626	13.3066	0.705215	0.400543	3.37999	8741.3	570.185
Tb927.6.620	hypothetical protein, conserved	8.184	0.734	1.95432	7266	12313	13366	34.8826	0.648177	1.05	1.55934	1009.95	374.33
Tb927.6.630	hypothetical protein, conserved	2.19	0.717	3.64797	2868	4894	4837	49.9959	0.672604	1.50493	2.17183	2545.05	970.717
Tb927.6.640	ApaH-like phosphatase ALPH1	2.202	0.711	5.89569	538	1049	848	9.56435	0.666483	0.287896	1.99879	2018.86	160.059
Tb927.6.670	exosome complex component RRP45	1.089	0.719	4.57875	1022	1679	1813	35.9583	0.687693	1.08238	2.66506	4504.54	1007
Tb927.6.700	alanyl-tRNA synthetase, putative	2.898	0.758	17.9249	9725	15932	16887	127.728	0.706929	3.84475	3.4595	9327.05	5705.66
Tb927.6.720	40S ribosomal protein L14, putative	0.567	0.826	28.0702	12852	20528	21703	844.038	0.80341	25.4064	12.8032	359049	392182
Tb927.6.740	ATP-dependent DEAH-box RNA helicase, putative	3.753	0.69	3.72737	4126	7190	6927	42.2264	0.631882	1.27106	1.25014	545.174	305.104
Tb927.6.840	hypothetical protein, conserved	1.053	0.729	4.73485	2042	3401	3345	72.6242	0.698215	2.18606	3.07386	6707.32	2625.64
Tb927.6.850	ccr4-not transcription complex subunit 2	0.99	0.722	8.05639	1229	2022	2154	47.3738	0.69215	1.426	2.83113	5331.98	1478.28
Tb927.6.950	cysteinyl-tRNA synthetase, putative	2.355	0.728	16.9635	8981	14004	15116	141.34	0.681962	4.25447	2.46573	3626.34	3444.09
Tb927.7.1040	40S ribosomal protein S16, putative	0.447	0.828	26.6667	13597	22117	22777	1134.57	0.807943	34.1517	13.6149	426219	588488
Tb927.7.1060	ISWI complex protein	1.482	0.703	2.6936	2968	4950	4837	74.9695	0.666479	2.25666	1.99869	2018.56	1254.5
Tb927.7.1080	hypothetical protein, conserved	1.08	0.756	7.38689	1536	2631	2558	54.0596	0.724823	1.62725	4.40974	18356.1	3728.44
Tb927.7.1100	hypothetical protein, conserved	2.211	0.719	4.96838	4139	6592	6704	68.9375	0.674392	2.07509	2.22513	2723.15	1397.85
Tb927.7.1110	asparagine synthetase a, putative	1.053	0.739	19.8864	8079	13325	14481	295.386	0.708215	8.8914	3.52036	9792.04	13613.3
Tb927.7.1170	RNA-binding protein Y14	0.477	0.748	10.4167	1216	2097	2025	96.7785	0.72728	2.91313	4.55919	20144.7	7084.99
Tb927.7.1200	Protein of unknown function (DUF525), putative	1.32	0.713	3.02343	2157	3954	3459	62.8357	0.678533	1.89142	2.35367	3185.05	1408.85
Tb927.7.1240	Sphingosine kinase	2.307	0.713	3.4632	3398	5706	5780	56.0991	0.667434	1.68864	2.02474	2092.82	960.742
Tb927.7.1300	protein disulfide isomerase, putative	1.131	0.771	25.5732	16958	25928	27544	544.876	0.739095	16.4013	5.35158	31499.9	53138.9
Tb927.7.1310	hypothetical protein, conserved	4.041	0.731	4.9456	4360	6858	7442	40.3133	0.670693	1.21347	2.11626	2367.54	747.245
Tb927.7.1320	10 kDa heat shock protein, putative	0.3	0.798	19.802	6220	9517	10484	757.702	0.781568	22.8076	9.52053	157123	207188
Tb927.7.1330	hypothetical protein, conserved	1.065	0.717	3.74532	1638	2642	2808	57.8901	0.68604	1.74255	2.60597	4231.42	1557.43
Tb927.7.1360	hypothetical protein, conserved	1.098	0.714	4.54133	1538	2630	2742	54.4625	0.682564	1.63937	2.48596	3709.94	1346.66
Tb927.7.1630	hypothetical protein, conserved	0.594	0.707	8.37521	931	1687	1618	61.4501	0.683879	1.84971	2.53067	3899.09	1568.69
Tb927.7.1670	Eukaryotic translation initiation factor 4E type 6	0.558	0.748	10.6952	1911	3110	3116	126.774	0.72559	3.81604	4.45585	18896.7	8907.85
Tb927.7.1780	Adenine phosphoribosyltransferase, putative	0.705	0.756	15.5367	4586	7609	7995	248.148	0.730811	7.46949	4.78279	23023.5	19791.9
Tb927.7.1790	Adenine phosphoribosyltransferase, putative	0.69	0.729	12.987	656	1089	1179	36.6585	0.70408	1.10346	3.32835	8373.81	1528.11
Tb927.7.190	thimet oligopeptidase, putative	2.229	0.685	17.4927	8403	13198	14193	140.196	0.64021	4.22003	1.39964	747.122	1239.93
Tb927.7.1910	pyridoxal phosphate containing glycine decarboxylase, putative	2.91	0.708	10.2987	3268	5414	5813	43.2596	0.656824	1.30216	1.75337	1400.84	572.644
Tb927.7.1920	paraflagellar rod component, putative	1.629	0.715	12.8676	2989	4757	5111	68.7776	0.67671	2.07028	2.29621	2972.84	1475.35
Tb927.7.2070	heat shock protein DNAJ, putative	0.984	0.702	9.11854	1835	3140	3238	72.2428	0.672241	2.17458	2.16116	2510.32	1390.35
Tb927.7.210	Proline dehydrogenase, mitochondrial	1.668	0.704	14.3627	3800	6655	6300	87.2	0.665255	2.62481	1.96578	1927.2	1416.44
Tb927.7.2100	GMP synthase [glutamine-hydrolysing]	1.974	0.717	11.6338	1847	3186	3369	36.8205	0.67485	1.10833	2.23901	2770.81	754.966
Tb927.7.2120	hypothetical protein, conserved	1.245	0.693	7.21154	2250	3737	3956	69.2948	0.659526	2.08584	1.81883	1551.65	979.469
Tb927.7.2160	hypothetical protein, conserved	1.023	0.681	3.89864	3560	5646	5814	128.132	0.650657	3.85689	1.61268	1109.31	1460.32
Tb927.7.2170	hypothetical protein, conserved	4.443	0.707	5.62303	6557	10845	11440	56.4575	0.643765	1.69943	1.46876	854.666	544.319
Tb927.7.2190	translocon-associated protein (TRAP), alpha subunit, putative	0.798	0.732	12.4844	9694	15282	15801	445.766	0.705201	13.418	3.37933	8736.5	19094.2
Tb927.7.2200	mitochondrial import inner membrane translocase subunit tim9	0.234	0.737	21.097	1110	1922	1860	179.535	0.722488	5.40418	4.27226	16803.8	11700
Tb927.7.2240	hypothetical protein, conserved	1.632	0.746	10.3976	9197	15132	16090	215.178	0.707675	6.47707	3.49466	9593.93	9787.63
Tb927.7.2260	SEP domain containing protein, putative	0.837	0.733	10.7143	1722	2712	2795	75.3774	0.705554	2.26893	3.39554	8853.95	3256.54
Tb927.7.230	40S ribosomal protein S33, putative	0.309	0.782	19.2308	8297	12983	13774	983.286	0.765324	29.5979	7.63791	84977	181257
Tb927.7.2300	Nucleoporin NUP132	3.609	0.708	5.5371	5626	9715	9705	60.2368	0.651008	1.81319	1.62038	1124.14	692.392
Tb927.7.2360	N-acetyltransferase, putative	0.924	0.751	9.70874	2985	4714	5054	120.217	0.722163	3.61866	4.25345	16598.2	7772.73
Tb927.7.2390	Tripartite attachment complex protein 102	2.853	0.709	5.95238	2712	4715	4911	37.4257	0.658328	1.12655	1.7895	1482.85	513.836
Tb927.7.2400	tyrosyl-tRNA synthetase, putative	1.275	0.732	10.1721	2667	4600	4657	81.0091	0.698125	2.43845	3.07011	6684.51	2922.39
Tb927.7.2410	Dynamin family, putative	1.8	0.695	4.99168	2328	3979	3880	49.1922	0.654751	1.48074	1.70476	1295.16	619.219
Tb927.7.2440	pyrroline-5-carboxylate reductase, putative	0.81	0.702	4.92005	1921	3142	3231	89.0033	0.675	2.67909	2.24356	2786.55	1831.57
Tb927.7.2500	proteasome regulatory ATPase subunit 1	1.311	0.772	14.4597	4045	7037	7169	120.452	0.73765	3.62572	5.2477	29823.7	11342.1
Tb927.7.2550	proteasome regulatory ATPase subunit 5	1.335	0.755	20.1794	3272	5302	5913	94.1657	0.720337	2.83448	4.14945	15490.6	5824.49
Tb927.7.2570	mitochondrial RNA binding protein 1	1.419	0.689	10.5485	1764	2785	3102	46.9252	0.653263	1.4125	1.67072	1224.29	569.738
Tb927.7.2590	prefoldin, putative	0.51	0.777	7.79727	1991	3194	3426	146.431	0.755576	4.40773	6.692	58765.1	21305.2
Tb927.7.2640	cytoskeleton associated protein, putative	1.359	0.724	16.1527	4731	7819	7628	129.446	0.689027	3.89644	2.7137	4737.69	3744.37
Tb927.7.2650	hypothetical protein, conserved	1.611	0.734	14.8699	17785	28721	30926	418.142	0.695922	12.5865	2.97974	6149.97	14299
Tb927.7.2670	zinc finger protein family member, putative	1.383	0.733	5.77201	681	1037	976	17.1666	0.69772	0.51673	3.05327	6582.73	613.214
Tb927.7.2680	zinc finger protein family member, putative	2.124	0.723	8.93277	1561	2546	2666	27.7639	0.679278	0.83572	2.37759	3276.18	633.866
Tb927.7.270	Ribosome production factor 2 homolog	1.311	0.707	7.18778	1443	2215	2491	48.3033	0.67265	1.45398	2.17319	2549.51	938.909
Tb927.7.2700	NADH-cytochrome b5 reductase, putative	0.861	0.736	19.6759	2513	4065	4216	109.075	0.708163	3.28327	3.51786	9772.69	5020.53
Tb927.7.2710	NADH-cytochrome b5 reductase, putative	0.861	0.668	10.4167	1528	2600	2624	67.9583	0.640163	2.04561	1.39874	745.78	600.351
Tb927.7.2720	translation initiation factor SUI1, putative	1.989	0.645	2.00803	3097	5278	5538	60.6114	0.60269	1.82446	0.841415	180.654	215.615
Tb927.7.2740	hypothetical protein, conserved	0.54	0.726	11.0497	887	1231	1192	54.3244	0.703955	1.63522	3.32269	8334.13	2257.63
Tb927.7.2780	hypothetical protein, conserved	0.351	0.72	16.9492	1407	2195	2391	148.008	0.702226	4.45518	3.24572	7806.61	5898.25
Tb927.7.2790	Component of motile flagella 10	2.103	0.698	4.74834	2838	4779	4952	51.8891	0.654495	1.56191	1.69885	1282.68	649.122
Tb927.7.280	cyclophilin-type peptidyl-prolyl cis-trans isomerase, putative	0.675	0.736	14.7493	1060	1720	1885	59.8851	0.711352	1.8026	3.67338	11026.2	2978.28
Tb927.7.2820	histone H2A, putative	0.402	0.844	24.6914	4160	6333	6867	375.824	0.824979	11.3127	17.154	812047	294774
Tb927.7.2950	ATPase family associated with various cellular activities (AAA), putative	2.01	0.681	2.98063	1981	3258	3753	38.725	0.638468	1.16566	1.36694	699.444	328.308
Tb927.7.2970	ATP-dependent DEAD/H RNA helicase, putative	2.472	0.695	2.0202	3689	6353	6355	57.5645	0.647832	1.73275	1.55207	996.862	612.585
Tb927.7.3040	F-box and WD40 domain containing protein	1.905	0.717	9.95807	1651	2686	2821	32.7138	0.675593	0.984717	2.26169	2849.83	682.973
Tb927.7.3050	Mitochondrial SSU ribosomal protein, putative	3.495	0.737	5.1458	3180	6001	6031	37.4259	0.680915	1.12656	2.43098	3485.53	889.093
Tb927.7.3080	Kinetochore interacting protein 4	1.287	0.704	3.10078	1501	2407	2521	43.5309	0.669966	1.31032	2.0955	2303.29	792.771
Tb927.7.3090	Galactose oxidase, central domain containing protein, putative	3.084	0.702	1.29576	4354	7343	7632	54.4217	0.649316	1.63815	1.58362	1054.43	600.381
Tb927.7.3160	Cytoplasmic dynein 1 heavy chain (DYNC1H1), putative	15.87	0.713	0.252	6307	10819	12511	16.1139	0.593488	0.485045	0.74269	127.537	45.8478
Tb927.7.3170	Beta-lactamase superfamily domain containing protein, putative	1.173	0.719	5.10204	1975	3258	3325	63.4555	0.686508	1.91007	2.62257	4307.04	1726.67
Tb927.7.3180	adaptor complex AP-1 medium subunit, putative	1.296	0.75	19.2456	5976	9728	9996	172.7	0.715847	5.19845	3.9043	13070.4	9579.11
Tb927.7.320	RNA-binding protein 8	0.54	0.759	9.2081	914	1514	1332	60.7909	0.736955	1.82987	5.19842	29048.9	5628.39
Tb927.7.3280	translation initiation factor IF-2, putative	2.163	0.731	2.96108	1273	2280	2460	23.9362	0.686879	0.720504	2.63577	4367.78	657.199
Tb927.7.3290	WD domain, G-beta repeat, putative	1.119	0.721	5.34759	1329	2192	2170	44.2959	0.689265	1.33335	2.72248	4780.55	1288.74
Tb927.7.3330	Flagellar attachment zone protein 10	13.002	0.717	3.61399	7256	11855	17100	23.8705	0.608825	0.718526	0.91442	227.853	98.5504
Tb927.7.3360	farnesyl pyrophosphate synthase	1.101	0.741	3.62319	1714	2920	2923	59.5419	0.709521	1.79227	3.58328	10288.1	2832.48
Tb927.7.3370	Intraflagellar transport protein 74, putative	1.788	0.753	21.7755	6831	10935	11394	142.276	0.712885	4.28264	3.75054	11684.5	7344.05
Tb927.7.3410	centrin-4	0.447	0.731	20	3667	6007	6383	310.74	0.710943	9.35358	3.65302	10856.5	15301.1
Tb927.7.3420	peptidyl-prolyl cis-trans isomerase, putative	0.336	0.711	17.6991	1408	2275	2475	158.232	0.69361	4.76294	2.88775	5634.81	5115.66
Tb927.7.3430	cyclophilin-type peptidyl-prolyl cis-trans isomerase, putative	0.693	0.699	5.74713	860	1610	1427	48.5029	0.674026	1.45999	2.21412	2685.73	974.802
Tb927.7.3440	I/6 autoantigen	0.738	0.696	13.4953	3464	5273	6016	174.095	0.670228	5.24043	2.10295	2326.22	3190.76
Tb927.7.3500	Prostaglandin E synthase	0.936	0.733	19.1693	2410	3713	4086	95.1286	0.703976	2.86346	3.32365	8340.84	3955.42
Tb927.7.3540	hypothetical protein, conserved	0.813	0.677	4.90196	2191	3475	3393	97.4291	0.64995	2.93271	1.5973	1080.03	1091.51
Tb927.7.3550	cytoskeleton associated protein, putative	3.723	0.736	17.445	26140	42972	47433	271.767	0.678115	8.18046	2.34037	3135.09	6031.84
Tb927.7.3560	Component of motile flagella 7	5.28	0.711	3.78573	7040	12378	12963	53.0244	0.642065	1.59609	1.43529	801.438	490.56
Tb927.7.3620	tyrosyl-tRNA synthetase, putative	2.091	0.755	13.3715	4040	6864	7285	75.3611	0.711619	2.26844	3.68669	11138	3772.29
Tb927.7.3630	TPR-repeat-containing chaperone protein DNAJ, putative	1.584	0.725	15.1229	6594	10891	11429	158.626	0.687243	4.77479	2.64882	4428.4	4393.95
Tb927.7.3680	ubiquitin/ribosomal protein S27a, putative	0.459	0.787	10.8225	12699	19806	20439	1004.72	0.766675	30.243	7.77921	89435.4	191384
Tb927.7.3700	hypothetical protein, conserved	0.915	0.65	5.44662	1863	2927	3204	76.0548	0.621303	2.28932	1.08304	365.343	425.078
Tb927.7.3740	hypothetical protein, conserved	2.547	0.737	15.2941	6947	11393	11670	102.664	0.689122	3.0903	2.7172	4754.73	2976.54
Tb927.7.3750	TFIIF-stimulated CTD phosphatase, putative	0.594	0.717	8.37521	1880	3321	3543	126.533	0.693879	3.80876	2.89827	5692.29	4117.55
Tb927.7.3770	Bifunctional NAD(P)H-hydrate repair enzyme	1.725	0.696	5.20833	2421	3948	3928	52.09	0.656598	1.56796	1.74802	1388.93	685.769
Tb927.7.3780	Nuclear poly(A) polymerase 2	2.061	0.726	3.87597	3213	5546	5426	59.7649	0.682931	1.79898	2.49837	3761.83	1491
Tb927.7.3810	'Cold-shock' DNA-binding domain containing protein, putative	1.143	0.721	5.2356	2951	4730	4980	96.4791	0.688927	2.90412	2.71001	4719.71	2783.98
Tb927.7.3880	Basal body protein	2.328	0.688	6.00601	3092	5045	5225	50.0056	0.642227	1.50522	1.43844	806.347	464.447
Tb927.7.3920	hypothetical protein, conserved	0.96	0.675	7.26895	2524	3744	3946	93.3984	0.645606	2.81138	1.50591	916.336	941.637
Tb927.7.3940	mitochondrial carrier protein	0.993	0.723	13.0522	4551	7477	7987	174.901	0.693105	5.26469	2.86803	5528.13	5585.66
Tb927.7.3950	RNA-editing complex protein	2.925	0.704	1.36612	2593	4659	4628	35.1114	0.652692	1.05689	1.65782	1198.1	420.429
Tb927.7.3980	tc40 antigen-like	2.712	0.726	11.418	6602	10410	11289	91.0502	0.676596	2.7407	2.29264	2959.96	1947.68
Tb927.7.4000	glutathione synthetase, putative	1.665	0.713	4.19664	2075	3685	3564	48.4933	0.67429	1.4597	2.22205	2712.64	980.863
Tb927.7.4020	protein phosphatase 2C, putative	2.238	0.701	2.67738	734	1511	1377	13.8504	0.65612	0.41691	1.73672	1364.04	180.238
Tb927.7.4030	hypothetical protein, conserved	1.614	0.704	3.71058	2210	3842	3835	53.0808	0.665887	1.59778	1.98271	1973.87	875.557
Tb927.7.4060	cysteine peptidase, Clan CA, family C2, putative	0.345	0.769	14.3678	8138	12520	13488	859.616	0.751379	25.8753	6.32173	50136.8	112957
Tb927.7.4120	hypothetical protein, conserved	1.521	0.709	4.59318	3329	5068	5641	80.651	0.672001	2.42767	2.15414	2487.66	1543.17
Tb927.7.4140	mitochondrial ribosomal protein L21	0.564	0.701	7.05467	597	1066	1005	40.8465	0.67847	1.22952	2.35168	3177.51	914.433
Tb927.7.4170	fatty acid elongase, putative	0.813	0.721	4.90196	6017	9613	9957	274.152	0.69395	8.25225	2.90108	5707.71	8936.77
Tb927.7.4180	fatty acid elongase, putative	0.915	0.747	6.53595	5495	9201	9402	228.523	0.718303	6.87878	4.03654	14343.1	13454.1
Tb927.7.4220	WD domain, G-beta repeat/Dip2/Utp12 Family, putative	3.33	0.728	5.12357	2662	4461	4528	30.5763	0.673255	0.920377	2.19109	2608.52	603.125
Tb927.7.4240	hypothetical protein, conserved	0.336	0.705	14.7493	523	910	981	61.5819	0.68761	1.85368	2.66206	4490.4	1721.11
Tb927.7.4290	Nuclear distribution protein C homolog	0.891	0.728	20.1342	4094	6468	7154	172.879	0.699682	5.20383	3.13562	7090.13	6476.79
Tb927.7.4310	pyridine nucleotide-disulphide oxidoreductase, putative	1.431	0.705	2.59403	1214	2021	2038	32.0517	0.669113	0.964788	2.07138	2230.1	571.746
Tb927.7.4340	Protein of unknown function (DUF1253), putative	2.565	0.734	3.50467	3233	5440	5879	49.1685	0.685953	1.48002	2.60289	4217.48	1319.99
Tb927.7.4390	threonine synthase, putative	2.025	0.736	15.7791	2112	3702	3600	40.3144	0.693309	1.2135	2.87598	5570.98	1293.88
Tb927.7.4420	proteasome alpha 3 subunit, putative	0.858	0.742	19.7445	3842	6112	6662	168.364	0.714212	5.06792	3.81862	12285.9	8975.02
Tb927.7.4450	hypothetical protein, conserved	2.988	0.701	2.34035	4864	8010	8841	63.0684	0.649143	1.89842	1.5799	1047.53	692.846
Tb927.7.4460	von Willebrand factor type A domain containing protein, putative	2.526	0.699	5.9312	3382	5699	5903	51.5098	0.65132	1.5505	1.62725	1137.48	596.58
Tb927.7.4470	hypothetical protein, conserved	0.579	0.68	12.0275	5806	9390	9807	374.957	0.657172	11.2866	1.76168	1419.44	5005.63
Tb927.7.4480	adenosine 5'-monophosphoramidase, putative	0.423	0.715	23.4742	2410	3863	4064	211.91	0.695488	6.37869	2.96225	6049.81	7170.64
Tb927.7.4500	PX domain containing protein, putative	1.584	0.766	18.2735	5148	8307	8901	122.82	0.728243	3.697	4.61909	20891.8	9203.97
Tb927.7.4520	Thioredoxin-like, putative	0.603	0.805	23.1023	7028	10669	11718	425.426	0.781704	12.8058	9.53808	157932	116714
Tb927.7.4570	inosine-guanine nucleoside hydrolase	1.071	0.714	16.7598	2574	4077	4487	90.4715	0.682953	2.72328	2.49911	3764.94	2258.25
Tb927.7.4670	ribosomal RNA processing protein 4	0.972	0.676	5.51876	511	850	949	20.548	0.646423	0.618517	1.52268	945.1	211.313
Tb927.7.470	Enriched in surface-labeled proteome protein 14	0.891	0.679	10.0671	3224	5568	5828	141.738	0.650682	4.26646	1.61324	1110.37	1616.38
Tb927.7.4700	WD domain, G-beta repeat, putative	2.094	0.759	13.8293	2809	4367	4745	49.7251	0.715588	1.49678	3.89059	12942.7	2740.78
Tb927.7.4710	Mitochondrial ribosomal protein L46	0.888	0.733	4.48934	703	1147	1250	30.273	0.70473	0.911246	3.35782	8582.23	1281.99
Tb927.7.4760	hypothetical protein, conserved	1.617	0.727	2.46914	1402	2414	2585	34.2183	0.688852	1.03	2.70725	4706.33	985.596
Tb927.7.4770	cyclophilin-type peptidyl-prolyl cis-trans isomerase, putative	0.519	0.754	11.7253	6466	10389	10330	455.987	0.732388	13.7256	4.88618	24438.9	37787.8
Tb927.7.4790	proteasome beta 6 subunit	0.774	0.768	11.583	2012	3150	3377	96.1222	0.741607	2.89337	5.537	34639.9	9963.54
Tb927.7.4810	HD domain containing protein, putative	1.374	0.712	2.90487	645	1128	1121	18.2377	0.676835	0.548974	2.30009	2986.86	392.4
Tb927.7.4840	hypothetical protein, conserved	1.002	0.71	5.97015	521	982	840	20.2132	0.67997	0.608436	2.40001	3363.07	469.294
Tb927.7.4870	hypothetical protein, conserved	0.81	0.71	7.38007	865	1593	1588	42.9509	0.683	1.29287	2.50069	3771.6	1073.31
Tb927.7.4900	5'-3' exoribonuclease A	4.254	0.719	9.8661	2799	4696	5259	25.957	0.657124	0.781331	1.76053	1416.86	346.118
Tb927.7.4910	hypothetical protein, conserved	1.107	0.77	18.9189	2883	4458	4708	95.1445	0.738436	2.86394	5.30391	30723.4	9131.55
Tb927.7.4970	glutamine synthetase, putative	1.263	0.66	13.089	1271	1989	2009	40.3396	0.626285	1.21426	1.15875	441.126	254.444
Tb927.7.4990	hypothetical protein, conserved	2.238	0.696	4.01606	1819	2985	2950	30.236	0.65112	0.910132	1.62285	1128.92	348.496
Tb927.7.5000	60S ribosomal protein L19, putative	0.78	0.837	19.1571	8680	13693	14371	410.568	0.810505	12.3585	14.0963	469607	226621
Tb927.7.5050	hypothetical protein, conserved	2.919	0.729	2.73785	2178	3565	3546	27.7785	0.677745	0.836159	2.32866	3091.5	611.027
Tb927.7.5090	condensin complex subunit 2, putative	2.862	0.721	2.79232	2398	4379	4164	33.0598	0.670248	0.995133	2.10351	2327.95	606.202
Tb927.7.5110	hypothetical protein, conserved	1.707	0.738	2.92398	1725	3010	2994	39.2298	0.698804	1.18085	3.09851	6858.5	1438.73
Tb927.7.5130	hypothetical protein, conserved	0.714	0.728	9.7629	742	1377	1348	41.7351	0.70265	1.25627	3.26444	7932.86	1680.39
Tb927.7.5140	hypothetical protein, conserved	1.41	0.703	2.83086	2457	4246	4383	68.0419	0.667377	2.04813	2.02319	2088.34	1163.67
Tb927.7.5160	deoxyuridine triphosphatase, putative	0.861	0.721	10.4167	2790	4229	4882	120.425	0.693163	3.62492	2.87028	5540.23	3851.32
Tb927.7.5210	Putative Phosphatase/Protein of unknown function DUF89, putative	2.694	0.729	7.41565	6916	11577	12132	98.7317	0.67976	2.97192	2.39318	3336.42	2280.61
Tb927.7.5230	lanosterol synthase	2.718	0.722	3.67512	4563	7851	8364	66.152	0.672541	1.99124	2.16997	2538.97	1282.44
Tb927.7.5300	C2 domain/Ankyrin repeats (3 copies), putative	2.124	0.698	1.88058	2091	3446	3457	36.9067	0.654278	1.11093	1.69387	1272.21	459.273
Tb927.7.5340	hypothetical protein, conserved	1.494	0.749	13.3601	876	1294	1651	22.2548	0.712331	0.669892	3.72247	11442.2	1133.41
Tb927.7.5480	dihydrofolate reductase-thymidylate synthase	1.581	0.712	8.20707	2035	3168	3320	47.1466	0.674279	1.41916	2.22172	2711.52	953.371
Tb927.7.5490	protein arginine n-methyltransferase 7	1.17	0.729	4.26257	1836	2819	3132	58.0773	0.69655	1.74818	3.00521	6297.75	2016.53
Tb927.7.550	WD domain, G-beta repeat, putative	1.497	0.688	4	1716	2890	2993	44.0459	0.651294	1.32582	1.62669	1136.39	509.819
Tb927.7.5560	glucosamine-fructose-6-phosphate aminotransferase, putative	1.977	0.712	4.54545	2269	3749	3586	42.4234	0.669818	1.27699	2.0913	2290.44	769.832
Tb927.7.5660	hypothetical protein, conserved	1.725	0.702	13.8889	2288	3787	4068	51.0339	0.662598	1.53617	1.89621	1742.91	777.203
Tb927.7.5680	deoxyribose-phosphate aldolase, putative	0.84	0.715	11.8624	922	1480	1609	41.4758	0.687505	1.24846	2.65824	4472.46	1156.21
Tb927.7.570	prefoldin, putative	0.591	0.749	20.202	3370	5007	5226	201.727	0.725937	6.07218	4.47687	19146.3	14294.3
Tb927.7.5700	peripherally associated ATOM36	1.215	0.67	7.26895	2019	3180	3579	79.4751	0.636932	2.39228	1.33876	659.958	649.129
Tb927.7.5760	nuclear transport factor 2 protein, putative	0.405	0.688	17.1569	1056	1751	1843	99.1725	0.668908	2.98519	2.06564	2212.9	1760.3
Tb927.7.5790	protein disulfide isomerase, putative	0.405	0.705	17.1569	7464	10744	12486	661.157	0.685908	19.9015	2.6013	4210.3	17730.3
Tb927.7.580	GTP-binding protein, putative	2.046	0.721	3.4163	2799	4694	4637	51.6135	0.678088	1.55362	2.33954	3131.97	1144.82
Tb927.7.5840	hypothetical protein, conserved	0.687	0.747	7.24638	2070	3241	3340	109.884	0.722134	3.30763	4.25182	16580.5	7099.79
Tb927.7.5850	hypothetical protein, conserved	1.872	0.691	2.13333	1666	2599	2889	33.3221	0.649954	1.00303	1.59737	1080.18	373.344
Tb927.7.590	hypothetical protein, conserved	1.389	0.72	5.02874	1510	2521	2512	40.983	0.684643	1.23363	2.55705	4013.55	1065.81
Tb927.7.5910	Autophagy-related protein 8.2	0.36	0.712	11.0193	474	778	788	49.0483	0.694	1.4764	2.90305	5718.5	1600.81
Tb927.7.6090	eukaryotic translation initiation factor 3 subunit a	2.286	0.752	21.8436	13092	21042	22442	215.637	0.706641	6.4909	3.44601	9225.96	9565.48
Tb927.7.6180	hypothetical protein, conserved	0.834	0.707	5.97372	1020	1891	1876	49.3378	0.679603	1.48512	2.38809	3316.68	1135.33
Tb927.7.6220	calcium/calmodulin-dependent protein kinase, putative	1.635	0.723	4.884	584	997	1001	13.7065	0.68464	0.412579	2.55694	4013.03	356.424
Tb927.7.6260	TPR repeat, putative	0.966	0.753	9.28793	2236	3674	3771	87.1282	0.723514	2.62265	4.33216	17469.3	5821.27
Tb927.7.6270	peptidase t, putative	1.218	0.738	6.33413	1161	2252	2281	40.0097	0.704891	1.20433	3.36517	8634.74	1700.97
Tb927.7.6280	Domain of unknown function (DUF3508), putative	1.92	0.723	3.12012	1356	2501	2639	29.072	0.681431	0.875095	2.44803	3554.18	699.334
Tb927.7.6290	kinesin, putative	2.673	0.71	7.10015	2814	4669	4981	40.4992	0.660952	1.21907	1.85435	1637.67	592.61
Tb927.7.6340	hypothetical protein, conserved	1.326	0.726	4.51467	455	919	681	13.3916	0.691454	0.403101	2.80453	5193.4	410.878
Tb927.7.6360	histone H2A variant Z	0.537	0.784	14.8148	2406	3541	3569	155.679	0.762016	4.68608	7.30282	74980.3	26483.3
Tb927.7.640	hypothetical protein, conserved	1.002	0.714	7.9602	1138	1947	1986	43.8306	0.68397	1.31934	2.53381	3912.6	1121.39
Tb927.7.6440	vesicle transport v-SNARE protein, putative	0.666	0.649	11.9581	2769	4517	4437	153.271	0.624517	4.61361	1.1313	412.587	926.159
Tb927.7.6460	Defective in exine formation 1 homolog, putative	2.535	0.726	3.35249	4547	7553	7983	68.8278	0.678235	2.07178	2.34419	3149.38	1532.09
Tb927.7.650	hypothetical protein, conserved	2.952	0.708	3.38409	2624	4798	5014	36.2666	0.656456	1.09166	1.74464	1381.47	475.806
Tb927.7.6610	hypothetical protein, conserved	2.691	0.709	4.08315	3656	6298	6267	52.329	0.659787	1.57515	1.82528	1567.05	744.363
Tb927.7.6620	Probable N6-adenine methyltransferase, putative	1.62	0.732	3.69686	3158	5530	5448	75.6027	0.693816	2.27571	2.89582	5678.88	2456.49
Tb927.7.6640	hypothetical protein, conserved	4.851	0.722	1.44211	5315	9056	9116	42.0771	0.655925	1.26656	1.73213	1354	544.97
Tb927.7.6660	chaperone protein DnaJ, putative	0.771	0.719	5.16796	689	1192	1100	33.578	0.692658	1.01073	2.85069	5435.39	1060.77
Tb927.7.6670	hypothetical protein, conserved	9.09	0.717	0.549874	4481	7348	8242	19.1675	0.626551	0.57696	1.16294	445.59	121.683
Tb927.7.6680	STE/STE11 serine/threonine-protein kinase, putative	2.697	0.709	1.48148	1608	2977	2623	23.1588	0.659732	0.697102	1.82392	1563.81	328.988
Tb927.7.6790	hypothetical protein, conserved	1.611	0.732	6.81537	1450	2647	2759	36.6165	0.693922	1.10219	2.9	5701.75	1192.82
Tb927.7.680	chaperone protein DnaJ, putative	2.322	0.684	2.15054	2201	3705	3816	36.3675	0.638286	1.0947	1.36357	694.644	306.962
Tb927.7.6800	LSU ribosomal protein, mitochondrial, putative	1.134	0.737	5.27704	691	1160	1132	22.8849	0.705053	0.688859	3.37257	8687.85	976.762
Tb927.7.6850	trans-sialidase	2.313	0.731	3.88601	1373	2323	2385	22.8272	0.685374	0.687123	2.58254	4126.12	604.278
Tb927.7.6890	methyltransferase domain containing protein, putative	0.762	0.781	16.9935	2868	4174	5052	138.462	0.754812	4.16784	6.62306	57091.7	19775.7
Tb927.7.6900	Sister chromatid cohesion protein 1	1.752	0.758	3.4188	4930	8222	8647	108.022	0.718291	3.25157	4.03587	14336.5	6357.79
Tb927.7.6910	Phosphatidylinositol 4-phosphate 5-kinase, putative	2.469	0.733	12.5405	8852	13480	14752	131.463	0.685861	3.95716	2.59963	4202.78	3521.4
Tb927.7.6930	ATPase, putative	1.47	0.718	6.78887	1131	1865	1965	29.3221	0.681627	0.882625	2.45455	3580.66	708.718
Tb927.7.6970	paraflagellar rod protein, putative	2.064	0.738	10.6434	1399	2323	2333	25.5459	0.6949	0.768958	2.93871	5916.62	852.171
Tb927.7.6980	Mono-functional DNA-alkylating methyl methanesulfonate N-term/CPSF A subunit region, putative	5.502	0.723	2.36149	6082	10280	10490	42.4241	0.652631	1.27701	1.65644	1195.34	507.24
Tb927.7.700	hypothetical protein, conserved	1.998	0.702	4.9975	1262	2330	2340	25.5699	0.659595	0.769679	1.82052	1555.69	362.029
Tb927.7.7000	hook complex protein, conserved	4.788	0.709	2.71342	3859	5873	6468	29.6235	0.643356	0.891698	1.46063	841.534	282.784
Tb927.7.7030	zinc-finger of a C2HC-type, putative	1.953	0.712	3.06748	1692	3000	3337	35.3762	0.670075	1.06486	2.09859	2312.8	645.965
Tb927.7.7040	methylthioadenosine phosphorylase, putative	0.927	0.764	18.2796	10418	16225	17621	416.253	0.735116	12.5296	5.07037	27096.5	36856.9
Tb927.7.7050	hypothetical protein, conserved	2.73	0.723	4.14079	2790	4863	4689	39.2583	0.673432	1.18171	2.19635	2626.02	777.708
Tb927.7.7070	MYND finger, putative	1.329	0.731	9.75976	1566	2330	2647	43.0686	0.696415	1.29641	2.99972	6265.73	1490.53
Tb927.7.7080	mitochondrial glycoprotein-like protein	1.116	0.706	4.46828	1896	3239	3408	66.227	0.674308	1.9935	2.22259	2714.51	1340.15
Tb927.7.710	heat shock 70 kDa protein, putative	1.917	0.744	22.3958	13538	22392	23990	271.391	0.702463	8.16914	3.25616	7876.88	10877.6
Tb927.7.7210	Present in the outer mitochondrial membrane proteome 37	2.088	0.733	5.26064	2470	4241	3869	44.1724	0.68965	1.32963	2.73674	4850.71	1297.21
Tb927.7.7250	Ankyrin repeats (3 copies), putative	3.951	0.715	2.27618	4322	7113	7221	41.1631	0.655369	1.23905	1.71911	1325.79	525.98
Tb927.7.7410	Trans-2-enoyl-CoA reductase, putative	1.005	0.712	8.92857	1113	1995	2016	43.9647	0.681925	1.32338	2.4645	3621.29	1070.35
Tb927.7.7420	ATP synthase F1, alpha subunit	1.752	0.781	16.5242	4877	7525	8617	104.556	0.741291	3.14723	5.51334	34228.5	10755
Tb927.7.7440	hypothetical protein, conserved	0.369	0.687	11.9048	894	1351	1325	84.651	0.668776	2.54808	2.06195	2201.9	1497.75
Tb927.7.7460	hypothetical protein, conserved	0.576	0.732	18.9983	5054	7830	8059	317.398	0.709232	9.55398	3.56922	10175.9	14993.1
Tb927.7.7500	thymine-7-hydroxylase, putative	0.96	0.734	4.15369	1234	2123	2301	50.8556	0.704606	1.5308	3.35218	8542.14	2147.16
Tb927.7.760	hypothetical protein, conserved	1.707	0.733	4.09357	4396	6837	7200	94.4383	0.693804	2.84268	2.89535	5676.32	3067.62
Tb927.7.800	mitochondrial RNA binding complex 1 subunit	1.629	0.705	3.06373	1435	2550	2586	34.8481	0.66671	1.04896	2.00497	2036.33	586.415
Tb927.7.830	telomerase-associated protein, putative	8.418	0.711	0.475003	6768	11944	12034	31.6327	0.623959	0.952176	1.12276	403.957	188.57
Tb927.7.840	Mitochondrial ATP synthase subunit, putative	0.372	0.753	13.3333	1673	2698	2968	170.412	0.734702	5.12956	5.04203	26676.1	14938.4
Tb927.7.880	RNA-binding protein, putative	0.831	0.713	7.19424	949	1624	1584	43.3909	0.685652	1.30611	2.59229	4169.74	1156.41
Tb927.7.900	hypothetical protein, conserved	1.785	0.709	11.1857	4656	7504	8102	98.7764	0.668919	2.97327	2.06594	2213.8	1753.73
Tb927.7.920	Inner arm dynein 5-1	12.336	0.725	2.35027	14229	23974	26741	45.59	0.619632	1.3723	1.05877	342.956	244.677
Tb927.7.930	zinc finger CCCH domain containing protein 17	1.389	0.661	4.86618	3251	5256	5516	99.2431	0.625643	2.98732	1.14871	430.543	616.304
Tb927.7.940	protein kinase C substrate protein, heavy chain, putative	1.443	0.687	8.29876	3868	6123	6600	100.209	0.650963	3.0164	1.61938	1122.21	1150.59
Tb927.7.970	NMD3 family, putative	1.626	0.734	3.68324	2280	3915	4008	54.377	0.695746	1.6368	2.9726	6108.95	1851.54
Tb927.7.990	chaperone protein DnaJ, putative	2.334	0.694	8.13008	1980	3533	3575	33.6464	0.648168	1.01279	1.55915	1009.6	360.984
Tb927.8.1080	centrin, putative	0.588	0.777	8.46024	1565	2642	2632	100.778	0.753996	3.03352	6.55011	55354.8	14111.1
Tb927.8.1170	eukaryotic translation initiation factor 3 subunit h	0.993	0.751	13.0522	1760	2918	3072	67.7082	0.721105	2.03808	4.19288	15947.2	4266.79
Tb927.8.1210	hypothetical protein, conserved	2.058	0.711	3.39641	5617	9398	9535	103.742	0.667963	3.12273	2.03933	2135.15	1799.63
Tb927.8.1270	conserved protein	1.686	0.711	5.4757	1332	2337	2443	36.202	0.672046	1.08972	2.15545	2491.89	693.441
Tb927.8.1290	hypothetical protein, conserved	3.318	0.703	1.20446	781	1433	1441	9.49819	0.648354	0.285905	1.56309	1016.73	102.365
Tb927.8.1320	hypothetical protein, conserved	0.72	0.71	6.91563	1497	2485	2739	80.6927	0.684544	2.42893	2.55362	3998.53	2093.47
Tb927.8.1330	60S ribosomal protein L7a, putative	0.828	0.811	26.4741	19187	30496	33456	872.62	0.783702	26.2667	9.80002	170332	251294
Tb927.8.1410	pre-rrna-processing protein tsr1 homolog	2.331	0.682	4.28449	813	1376	1451	13.5403	0.636197	0.407576	1.32549	641.864	108.638
Tb927.8.1420	acyl-CoA dehydrogenase, mitochondrial precursor, putative	1.557	0.677	10.2564	1530	2551	2617	37.3872	0.639566	1.12539	1.38746	729.125	325.531
Tb927.8.1440	maoC-like dehydratase, putative	0.486	0.703	16.3599	572	913	937	43.3285	0.682086	1.30423	2.46988	3643.38	1058.99
Tb927.8.1500	hypothetical protein, conserved	1.803	0.751	3.87597	3204	5189	5365	66.5132	0.710717	2.00211	3.64187	10764.3	3257.3
Tb927.8.1510	ATP-dependent RNA helicase DBP2B, putative	1.707	0.776	14.0351	4440	7388	8462	102.771	0.736804	3.0935	5.18784	28884.2	9480.5
Tb927.8.1540	hypothetical protein, conserved	2.67	0.746	5.61167	3238	5552	5467	46.4007	0.69698	1.39671	3.02277	6400.95	1627.99
Tb927.8.1550	paraflagellar rod component, putative	2.334	0.774	25.246	11182	18091	20078	183.733	0.728168	5.53055	4.61438	20832.4	13743.6
Tb927.8.1560	hypothetical protein, conserved	1.848	0.744	3.78174	2603	4106	4089	51.1754	0.703218	1.54043	3.28965	8104.95	2089.06
Tb927.8.1570	Uncharacterised protein family (UPF0172), putative	0.816	0.77	10.989	2304	3664	3966	105.861	0.7429	3.18653	5.63499	36377.2	11323
Tb927.8.1590	ubiquitin-protein ligase, putative	12.912	0.73	3.25203	10825	18698	20124	33.2716	0.6222	1.00151	1.0963	377.954	190.052
Tb927.8.1600	lysyl-tRNA synthetase, putative	1.752	0.739	17.094	9367	14982	16110	201.149	0.699291	6.05479	3.11904	6985.98	7464.7
Tb927.8.1710	protein phosphatase 2A, regulatory subunit B, putative	1.212	0.716	5.76132	1535	2628	2675	48.8896	0.682973	1.47162	2.49977	3767.72	1220.91
Tb927.8.1740	Mitochondrial import inner membrane translocase subunit TIM62	1.761	0.733	9.07029	2512	3529	4053	50.4564	0.693189	1.51879	2.8713	5545.73	1614.67
Tb927.8.1750	Fe-S cluster assembly protein DRE2	0.372	0.759	16	2609	3929	4081	249.135	0.740702	7.49921	5.4695	33474.6	25263.3
Tb927.8.1840	Sec7 domain containing protein, putative	6.189	0.724	3.87597	7227	12284	13067	45.6394	0.649367	1.37379	1.58471	1056.46	504.117
Tb927.8.1860	pitrilysin-like metalloprotease	3.09	0.738	10.6693	3279	5771	6049	42.2252	0.685265	1.27102	2.5787	4109.06	1114.81
Tb927.8.1870	Golgi/lysosome glycoprotein 1	1.848	0.751	15.127	22436	35568	38037	453.276	0.710218	13.6441	3.61728	10562.8	21930.4
Tb927.8.1890	cytochrome c1, heme protein, mitochondrial, putative	0.774	0.776	10.296	2743	4299	4337	128.477	0.749607	3.8673	6.17159	46885.2	16171.6
Tb927.8.1940	endosomal integral membrane protein, putative	1.884	0.683	2.11977	3757	5826	6802	75.6851	0.641822	2.2782	1.43057	794.105	696.091
Tb927.8.1950	hypothetical protein, conserved	2.13	0.699	3.75059	4213	7174	7696	77.5602	0.655216	2.33464	1.71556	1318.18	987.407
Tb927.8.1960	hypothetical protein, conserved	1.302	0.682	14.5594	3795	6246	6945	113.035	0.647768	3.40246	1.55073	994.459	1201.02
Tb927.8.1980	Beta propeller protein 1	1.431	0.704	5.5788	1738	2782	2897	45.1996	0.668113	1.36055	2.04347	2147.29	786.945
Tb927.8.1990	peroxidoxin	0.678	0.743	26.4317	12842	19842	21529	696.847	0.718298	20.9758	4.03623	14340.1	41020.6
Tb927.8.2000	cyclophilin, putative	0.903	0.731	15.2091	2772	4578	4921	135.246	0.702492	4.07103	3.25743	7885.48	5424.55
Tb927.8.2020	agmatinase, putative	0.993	0.708	4.01606	1456	2464	2427	55.5135	0.678105	1.67101	2.34007	3133.95	1231.83
Tb927.8.2030	hypothetical protein, conserved	1.263	0.75	24.4866	7478	12286	13101	225.961	0.716285	6.80165	3.92754	13288.6	12667.2
Tb927.8.2050	GDP-mannose pyrophosphorylase	1.107	0.733	9.90991	3021	5072	5265	104.653	0.701436	3.15015	3.2111	7576.53	4091.23
Tb927.8.2080	Fungal tRNA ligase phosphodiesterase domain containing protein, putative	0.558	0.697	16.0428	2730	4475	4557	182.963	0.67459	5.50736	2.23113	2743.67	3727.85
Tb927.8.2120	hypothetical protein, conserved	1.098	0.703	3.63306	1756	2891	3151	61.5679	0.671564	1.85325	2.14141	2446.87	1165.61
Tb927.8.2160	p-glycoprotein	4.743	0.717	7.16393	4568	8052	8687	38.7721	0.651665	1.16708	1.63488	1152.42	452.829
Tb927.8.2210	pteridine reductase 1	1.107	0.764	4.95663	1731	2806	3098	82.3215	0.732436	2.47796	4.88938	24483.6	6830.01
Tb927.8.2290	hypothetical protein, conserved	0.657	0.726	15.1515	246	347	454	13.8798	0.701683	0.417796	3.2219	7647.83	545.88
Tb927.8.2310	(H+)-ATPase G subunit, putative	0.327	0.706	21.2121	3661	6195	6081	420.783	0.688845	12.666	2.707	4705.12	12117.9
Tb927.8.2330	hypothetical protein, conserved	0.702	0.718	7.0922	1075	1742	1786	57.0269	0.692864	1.71657	2.85868	5477.99	1810.6
Tb927.8.2380	ABC transporter, putative	3.474	0.721	1.15042	6211	10384	10664	68.2433	0.665084	2.05419	1.96123	1914.8	1103.93
Tb927.8.2450	5'-AMP-activated protein kinase subunit beta	0.93	0.699	4.28725	2007	3137	3330	79.4956	0.670069	2.3929	2.09842	2312.27	1451.37
Tb927.8.2460	hypothetical protein, conserved	0.852	0.717	7.01754	4788	7740	8336	212.661	0.689309	6.4013	2.72409	4788.46	6193.68
Tb927.8.2470	hypothetical protein, conserved	0.282	0.709	14.0351	523	852	802	66.9632	0.693069	2.01566	2.86662	5520.55	2136.66
Tb927.8.2520	acetyl-CoA synthetase, putative	2.019	0.769	9.8912	4242	7170	7597	81.6136	0.726373	2.45665	4.50339	19464.4	5844.56
Tb927.8.2540	3-ketoacyl-CoA thiolase, putative	1.314	0.756	19.7418	7293	11500	12676	208.534	0.721611	6.27709	4.22175	16255.4	13303.6
Tb927.8.2550	mitochondrial DNA primase	1.887	0.732	4.2328	3833	5950	6620	75.8324	0.69079	2.28263	2.77935	5064.39	2289.42
Tb927.8.2620	hypothetical protein, conserved	2.502	0.691	1.59681	4199	7029	6896	63.1133	0.643547	1.89977	1.46443	847.65	605.281
Tb927.8.2630	kinesin-C	2.25	0.725	19.0857	3020	5102	5566	52.6687	0.68	1.58538	2.40099	3366.89	1223.71
Tb927.8.2640	ubiquitin-activating enzyme E1, putative	3.165	0.733	14.8359	13000	21967	23263	159.577	0.679629	4.80342	2.38892	3319.91	3674.36
Tb927.8.2660	Galactose oxidase, central domain containing protein, putative	5.757	0.706	0.694444	3393	5944	6030	23.1241	0.634019	0.696058	1.2869	591.08	175.976
Tb927.8.2740	mitochondrial RNA binding protein	1.014	0.764	13.766	3043	4867	5400	114.009	0.733791	3.43177	4.98007	25771.5	9775.29
Tb927.8.2770	inositol 1,4,5-trisphosphate receptor	9.297	0.716	2.15054	5494	9840	10327	23.8229	0.624527	0.717092	1.13145	412.739	143.986
Tb927.8.2780	RNA-binding protein RBP10, putative	0.918	0.711	5.42888	271	461	495	11.5503	0.682256	0.347676	2.4756	3666.95	283.47
Tb927.8.2820	hypothetical protein, conserved	3.876	0.765	4.89817	6817	10700	11477	65.3576	0.705937	1.96733	3.41326	8983.41	2850.07
Tb927.8.2850	Poly(A)-specific ribonuclease PARN-1	1.758	0.704	2.27144	922	1403	1635	19.6419	0.664223	0.591241	1.93847	1853.43	311.164
Tb927.8.2860	hypothetical protein, conserved	2.694	0.684	2.96626	4100	6716	6889	57.2708	0.63476	1.72391	1.2999	607.888	443.746
Tb927.8.2910	mannosyl-oligosaccharide 1,2-alpha-mannosidase IB, putative	1.764	0.712	2.26372	2763	5043	5141	63.2276	0.672155	1.90321	2.15865	2502.2	1214.32
Tb927.8.2970	hypothetical protein, conserved	0.912	0.766	5.46448	2116	3676	3474	88.1503	0.73735	2.65341	5.2264	29487.2	8240.28
Tb927.8.3060	metallo-peptidase, Clan MF, Family M17	2.013	0.734	9.92063	5070	8895	8978	98.6501	0.691436	2.96947	2.80383	5189.78	3025.4
Tb927.8.3100	coronin, putative	1.569	0.761	10	5105	8438	8908	124.297	0.723422	3.74147	4.32673	17408.4	8286.02
Tb927.8.3150	T-complex protein 1, gamma subunit, putative	1.668	0.801	25.1346	9328	15041	16262	211.918	0.762255	6.37893	7.32651	75660.7	36260
Tb927.8.3250	dynein heavy chain, putative	14.022	0.761	3.92157	19017	30405	36174	52.9745	0.648662	1.59459	1.56964	1028.66	575.212
Tb927.8.3270	hypothetical protein	0.603	0.625	6.60066	710	1196	1081	43.1384	0.601704	1.29851	0.830234	174.036	149.827
Tb927.8.3300	LSU ribosomal protein, mitochondrial, putative	2.073	0.71	2.40848	2157	3760	3706	40.2539	0.666806	1.21168	2.00759	2043.73	678.962
Tb927.8.3310	Elongator-like Protein 3b	1.998	0.719	1.999	1702	2975	3013	33.3206	0.676595	1.00298	2.29262	2959.88	712.757
Tb927.8.3380	succinate dehydrogenase iron-sulfur subunit	0.726	0.737	10.9739	2462	3872	4024	124.414	0.711438	3.74499	3.67766	11062.1	6200.43
Tb927.8.3410	Inositol hexakisphosphate, putative	4.554	0.719	0.87777	2182	4032	4395	20.001	0.65498	0.602049	1.71006	1306.43	253.17
Tb927.8.3470	Vesicle transport v-SNARE protein N-terminus, putative	0.702	0.719	7.0922	1877	2979	2927	96.8474	0.693864	2.9152	2.89771	5689.23	3150.46
Tb927.8.3530	glycerol-3-phosphate dehydrogenase [NAD+], glycosomal	1.062	0.82	23.4742	58932	92055	100770	2065.88	0.789084	62.1849	10.5422	208805	677956
Tb927.8.3550	mitogen-activated protein kinase 3, putative	1.113	0.705	9.85663	1947	2821	3424	64.3115	0.67335	1.93584	2.19392	2617.94	1271.49
Tb927.8.3660	protein transport protein SEC23	2.907	0.73	3.43643	4457	7531	7483	58.2733	0.67885	1.75409	2.36383	3223.56	1316.67
Tb927.8.3690	isocitrate dehydrogenase [NADP], mitochondrial precursor, putative	1.311	0.738	9.89346	2287	3857	3889	66.4638	0.70365	2.00063	3.30901	8238.73	2741.8
Tb927.8.3710	exonuclease, putative	2.367	0.692	2.1097	2763	4926	4898	45.9942	0.645845	1.38447	1.51079	924.65	466.406
Tb927.8.3750	nucleolar protein 56, putative	1.449	0.765	17.9063	5684	9725	10230	153.153	0.728888	4.61006	4.65966	21407.7	11658.1
Tb927.8.3770	Mitogen-activated protein kinase 10, putative	1.227	0.734	16.2602	3472	5417	5844	104.772	0.700769	3.15373	3.18219	7387.77	4030.12
Tb927.8.3790	paraflagellar rod component, putative	0.669	0.702	13.3929	1989	3258	3278	110.781	0.677462	3.3346	2.31975	3058.64	2420.12
Tb927.8.3840	hypothetical protein, conserved	2.223	0.723	8.53549	4774	7912	8089	81.3332	0.678271	2.44821	2.34533	3153.65	1812.03
Tb927.8.3870	SRP40, C-terminal domain containing protein, putative	3.615	0.739	2.76396	2203	3559	4135	23.7478	0.681961	0.714831	2.46569	3626.15	578.652
Tb927.8.3950	hypothetical protein, conserved	2.742	0.702	5.46448	2183	3638	3891	30.7459	0.652323	0.925481	1.64954	1181.49	364.873
Tb927.8.3970	oxidoreductase, putative	1.299	0.696	4.60829	1021	1779	1883	31.1284	0.661808	0.936995	1.876	1691.57	465.052
Tb927.8.4050	FLA1-binding protein	2.25	0.753	3.99467	1689	2877	2946	28.9709	0.708	0.872051	3.5101	9712.61	1328.21
Tb927.8.4190	hypothetical protein, conserved	0.693	0.651	5.74713	2786	4606	4733	151.819	0.626026	4.56991	1.15469	436.824	951.605
Tb927.8.4210	basal body component, putative	1.257	0.715	9.52381	1537	2590	2796	47.6695	0.681365	1.4349	2.44586	3545.38	1144.88
Tb927.8.4220	hypothetical protein, conserved	0.675	0.736	13.2743	4585	7279	7699	252.173	0.711352	7.59064	3.67338	11026.2	12541.4
Tb927.8.4230	hypothetical protein, conserved	3.246	0.696	2.4623	2921	4886	5094	34.5366	0.64195	1.03959	1.43305	797.951	318.626
Tb927.8.4330	small GTP-binding protein Rab11	0.648	0.789	16.8971	3501	5399	5892	198.877	0.76485	5.9864	7.58905	83469.1	36241.9
Tb927.8.4380	Archaic translocase of outer membrane 12 kDa subunit	0.315	0.786	18.8679	711	1088	1144	81.2287	0.769163	2.44506	8.04613	98261.5	16435.9
Tb927.8.4390	translation initiation factor eIF-2B subunit beta, putative	1.425	0.725	2.80112	1844	2859	2993	47.2459	0.689188	1.42215	2.71963	4766.61	1371.99
Tb927.8.4400	hypothetical protein, conserved	2.004	0.707	12.4564	5317	8403	9007	98.9462	0.664531	2.97838	1.94658	1875.16	1579.26
Tb927.8.4430	uridine phosphorylase	1.023	0.757	27.2904	22580	35751	37379	815.989	0.726657	24.5621	4.52079	19675	58839.9
Tb927.8.4450	RNA-binding protein, putative	1.284	0.72	3.885	2285	3990	4102	69.8646	0.686006	2.10299	2.60475	4225.91	1878.01
Tb927.8.4460	Domain of Unknown Function (DUF1042), putative	3.027	0.705	2.9703	3588	6098	6101	45.3335	0.652805	1.36458	1.66036	1203.24	544.323
Tb927.8.4500	Eukaryotic translation initiation factor 4 gamma 5	2.247	0.739	13.3333	1188	2041	2084	20.502	0.69403	0.617132	2.90423	5725	669.621
Tb927.8.4540	PAB1-binding protein , putative	1.65	0.752	9.07441	2976	4862	5053	68.0093	0.713464	2.04715	3.78012	11943.4	3560.23
Tb927.8.4570	Zinc finger, C3HC4 type (RING finger), putative	1.002	0.706	3.9801	1588	2710	2771	61.109	0.67597	1.83944	2.27327	2890.72	1287.5
Tb927.8.4580	Basal body protein	1.449	0.748	19.9725	5358	8140	8700	134.172	0.711888	4.03872	3.70014	11251.7	6760.08
Tb927.8.4610	Ras-related protein RabX1	0.654	0.717	9.13242	1781	2859	2869	100.035	0.692739	3.01115	2.85382	5452.05	3166.45
Tb927.8.4640	Component of motile flagella 19	1.155	0.764	14.6805	3844	5899	6403	122.137	0.731759	3.67644	4.84469	23864.3	9968.23
Tb927.8.4770	small GTP-binding protein Rab18	0.645	0.746	6.17284	1025	1847	1690	61.1396	0.721906	1.84036	4.2387	16438.1	3928.53
Tb927.8.4780	Flagellar Member 3	12.453	0.728	5.13809	11778	19626	21646	36.9539	0.622134	1.11235	1.09531	377.003	210.744
Tb927.8.4810	prohibitin 1	0.831	0.725	26.3789	2292	3295	3722	98.2617	0.697652	2.95777	3.05047	6565.95	3504.31
Tb927.8.4820	eukaryotic translation initiation factor 4 gamma 3	1.866	0.723	10.7009	3152	5027	5161	62.4432	0.68202	1.8796	2.46766	3634.25	1523.71
Tb927.8.4870	Component of motile flagella 6	3.612	0.71	3.59613	6390	10755	11209	68.177	0.652984	2.0522	1.6644	1211.42	822.172
Tb927.8.4890	pol-associated gene 1	1.326	0.691	8.2769	6662	10525	10917	185.096	0.656454	5.57156	1.74461	1381.39	2428.31
Tb927.8.4910	hypothetical protein, conserved	0.342	0.702	11.5942	1104	1851	1783	119.885	0.684456	3.60866	2.55056	3985.18	3103.6
Tb927.8.4950	kinesin, putative	4.368	0.711	2.51659	3051	5074	5075	26.3365	0.648301	0.792754	1.56196	1014.69	283.471
Tb927.8.4970	Paraflagellar rod protein 2-1	1.8	0.839	37.7149	12742	20461	22874	270.718	0.798751	8.14889	12.0191	301016	112337
Tb927.8.5050	OTU-like cysteine protease, putative	2.238	0.72	2.23115	2004	3326	3461	34.1508	0.67512	1.02797	2.24722	2799.25	704.829
Tb927.8.5070	hypothetical protein, conserved	0.375	0.731	12.7226	2378	3696	3679	226.715	0.712629	6.82436	3.73753	11571.7	11630.1
Tb927.8.5090	DNA-directed RNA polymerase I largest subunit	5.343	0.729	0.935279	5075	8246	8931	36.2441	0.659655	1.09098	1.82201	1559.25	513.911
Tb927.8.5120	cytochrome c	0.342	0.724	20.2899	2579	4237	4441	284.26	0.706456	8.55651	3.43734	9161.37	12552.8
Tb927.8.5140	diacylglycerol kinase, putative	1.725	0.705	2.89352	3581	5935	5817	77.4891	0.665598	2.3325	1.97496	1952.42	1269.24
Tb927.8.5200	Mitochondrial SSU ribosomal protein, putative	5.364	0.717	1.11794	5317	9540	9788	39.682	0.647519	1.19447	1.54549	985.12	419.087
Tb927.8.5230	peptidyl-prolyl cis-trans isomerase, putative	0.729	0.721	7.06714	1316	2236	2236	68.8023	0.695386	2.07102	2.95812	6026.29	2322.34
Tb927.8.5250	delta-coat protein, putative	1.593	0.734	13.7845	4171	7091	7387	101.463	0.696136	3.05415	2.98837	6199.81	3487.72
Tb927.8.5280	mitochondrial ribosomal protein s34	0.771	0.686	5.16796	2387	4109	3882	116.829	0.659658	3.51668	1.82208	1559.41	1656.66
Tb927.8.5290	WW domain containing protein, putative	1.851	0.753	4.31499	2395	4022	3981	48.8854	0.712185	1.4715	3.71507	11378.9	2480.83
Tb927.8.5300	hypothetical protein, conserved	1.686	0.718	2.96033	3001	4823	4746	65.1947	0.679046	1.96243	2.37012	3247.55	1480.08
Tb927.8.5330	tyrosyl/methionyl-tRNA synthetase, putative	0.669	0.75	19.3452	1663	2706	2833	93.4679	0.725462	2.81348	4.44813	18805.4	6547.2
Tb927.8.5380	ubiquitin fold modifier protein, putative	0.291	0.741	13.6054	1142	1681	1796	138.364	0.724817	4.16491	4.40935	18351.6	9541.39
Tb927.8.5400	hypothetical protein, conserved	2.823	0.683	1.41543	1884	3516	3616	27.4577	0.632595	0.826503	1.26228	560.074	201.855
Tb927.8.5460	Flagellar calcium-binding 44 kDa protein	1.221	0.777	12.2549	6248	10234	10859	194.542	0.74385	5.85592	5.70807	37708.8	21293.9
[truncated: 5,227 more rows]

## Sheet: Sheet 3. Gene cohorts
GeneID	Product	Cohort	CAI	Average CAI	Peptides/kbp	Average peptides/kbp	PMID
Tb927.9.12450	class I transcription factor A, subunit 2 (CITFA-2)	CITFA (Pol-I associated)	0.704	0.680667	0	1.41505	PMID: 17972917
Tb927.11.8310	class I transcription factor A, subunit 4 (CTFA-4)		0.657		3.42759
Tb927.11.1410	class I transcription factor A, subunit 3 (CITFA-3)		0.674		0
Tb927.11.1390	class I transcription factor A, subunit 1 (CITFA-1)		0.686		0
Tb927.5.970	class I transcription factor A, subunit 6 (CITFA-6)		0.67		3.4904
Tb927.8.4130	class I transcription factor A, subunit 5b (CITFA-5b)		0.693		1.57233
Tb927.10.6330	kinetoplastid kinetochore protein 1	Kinetochore	0.716	0.699789	0	0.585683	PMID: 24582333
Tb927.10.7240	kinetoplastid kinetochore protein 14		0.71		0
Tb927.3.2330	kinetoplastid kinetochore protein 17		0.724		0.538503
Tb927.4.5110	kinetoplastid kinetochore protein 8		0.722		0
Tb927.6.1210	kinetoplastid kinetochore protein 6		0.728		0
Tb927.6.3760	kinetoplastid kinetochore protein 15		0.701		0
Tb927.7.2110	kinetoplastid kinetochore protein 11		0.673		1.32275
Tb927.7.4850	kinetoplastid kinetochore protein 5		0.665		0
Tb927.7.4860	kinetoplastid kinetochore protein 13		0.705		0
Tb927.8.1150	kinetoplastid kinetochore protein 9		0.697		0
Tb927.8.1680	kinetoplastid kinetochore protein 12		0.713		0
Tb927.8.3680	kinetoplastid kinetochore protein 4		0.685		0
Tb927.11.1030	kinetoplastid kinetochore protein 7		0.677		2.06718
Tb927.11.1000	kinetoplastid kinetochore protein 16		0.649		0
Tb927.9.3800	kinetoplastid kinetochore protein 18		0.697		1.11297
Tb927.9.10920	kinetoplastid kinetochore protein 3		0.688		3.14762
Tb927.11.12410	kinetoplastid kinetochore protein 10		0.715		2.14592
Tb927.11.12420	kinetoplastid kinetochore protein 19		0.714		0
Tb927.11.10520	kinetoplastid kinetochore protein 2		0.717		0.793021
Tb927.11.12080	N-acetyl-D-glucosaminylphosphatidylinositol de-N-acetylase (GPI2)	GPI-anchor biosynthesis	0.682	0.711462	0	2.18919	PMID: 20382188
Tb927.11.15760	GPI transamidase (TTA2)		0.753		5.29101
Tb927.11.5070	ethanolamine phosphotransferase (EPT) (GPI13)		0.7		0
Tb927.10.13160	mannosyltransferase-II (GPI18)		0.698		0
Tb927.10.13290	ethanolamine phosphotransferase (EPT) (GPI11)		0.708		2.42131
Tb927.10.13860	GPI-anchor transamidase subunit 8 (GPI8)		0.724		10.4167
Tb927.10.15910	glycerol uptake protein (GUP1)		0.717		0
Tb927.10.210	GPI transamidase component (GAA1)		0.707		2.886
Tb927.10.5080	hypothetical protein, conserved (TTA2)		0.722		1.62206
Tb927.10.5560	GPI anchor biosynthesis protein (GPI1)		0.686		0
Tb927.3.2610	GPI inositol deacylase 2 (GPIdeAc2)		0.719		0
Tb927.4.1920	GPI transamidase, putative (TTA1)		0.715		5.82242
Tb927.6.3300	GPI alpha-mannosyltransferase I (GPI14)		0.718		0
Tb927.8.680	KREPA5	Editosome	0.681	0.71165	0	1.2485	PMID: 15691655
Tb927.10.5320	RNA editing endoribonuclease		0.684		0
Tb927.11.940	KREPB5		0.712		0
Tb927.11.2990	KREPB4		0.726		0
Tb927.3.3990	KREPB6		0.689		0
Tb927.10.3570	RNA editing exonuclease 2		0.719		6.97504
Tb927.2.2470	Kinetoplastid RNA editing protein 1		0.716		2.18436
Tb927.7.3950	RNA-editing complex protein		0.704		1.36612
Tb927.7.1070	KREX1		0.72		0
Tb927.1.1690	RNA-editing nuclease 1		0.691		0
Tb927.10.5440	RNA editing endoribonuclease		0.726		0
Tb927.9.5630	KREPB7		0.71		0
Tb927.8.620	RNA-editing complex protein MP42		0.693		0
Tb927.9.4360	KREL1		0.737		2.12766
Tb927.7.1550	KRET2		0.761		0
Tb927.10.9720	RNA-editing-associated protein 1		0.659		3.37838
Tb927.10.8210	KREPA2		0.75		1.70068
Tb927.10.5110	KREPA4		0.69		0
Tb927.10.5120	KREPA6		0.74		4.0404
Tb927.1.3030	KREL2		0.725		3.19744
Tb927.11.10420	DNA-directed RNA polymerase (RPA12)	RNA Pol-I	0.767	0.712286	0	2.86256	PMID: 17606628 PMID: 17267688 PMID: 15664659 PMID: 16730080
Tb927.11.14490	RNA polymerase subunit (RPB7)		0.681		6.9808
Tb927.11.630	RNA polymerase I second largest subunit (RPA134)		0.72		4.38322
Tb927.11.200	DNA-directed RNA polymerase subunit (RPB6z)		0.724		0
Tb927.10.13310	DNA-directed RNA polymerase II (RPB5z)		0.693		3.33333
Tb927.10.3540	hypothetical protein, conserved (RPA31)		0.672		4.40529
Tb927.8.5090	DNA-directed RNA polymerase I largest subunit (RPA190)		0.729		0.935279
Tb927.3.2890	radial spoke protein RSP10	Radial spoke	0.698	0.717	8.25593	11.1915	PMID: 21363968
Tb927.5.2850	radial spoke protein RSP2		0.735		7.70713
Tb927.8.810	radial spoke protein RSP9		0.71		21.9561
Tb927.11.1150	radial spoke protein RSP3		0.722		10.01
Tb927.11.4480	radial spoke protein RSP4/6		0.737		11.3766
Tb927.11.13690	radial spoke protein RSP11		0.7		7.84314
Tb927.11.10650	Adaptin 3 subunit (beta)	Adaptin-3	0.725	0.721	0.725426	1.23657	PMID: 26150481
Tb927.5.3610	Adaptin 3 subunit (delta)		0.708		2.65957
Tb927.4.2020	Adaptin 3 subunit (mu)		0.733		1.56128
Tb927.8.6680	Adaptin 3 subunit (sigma)		0.718		0
Tb11.02.5380	exosome complex exonuclease RRP44p homologue	Exosome	0.733	0.720692	3.42583	3.5831	PMID: 12821657 PMID: 14624005 PMID: 17940093
Tb927.7.4670	ribosomal RNA processing protein 4		0.676		5.51876
Tb927.6.670	exosome complex component RRP45		0.719		4.57875
Tb927.9.7070	exosome complex exonuclease RRP40		0.73		3.27869
Tb927.11.16600	exosome-associated protein 2		0.733		0
Tb927.11.11030	exosome-associated protein 4		0.722		2.86123
Tb927.10.7440	MTR4		0.738		9.46372
Tb927.10.7450	Ribosomal RNA processing protein 41A		0.714		3.95257
Tb927.2.2180	ribosomal RNA processing protein 41B		0.723		0
Tb927.5.1200	exosome complex component CSL4		0.719		1.07527
Tb927.1.2580	exosome-associated protein 1		0.725		2.51256
Tb927.4.1630	ribosomal RNA processing protein 6		0.73		6.62879
Tb927.7.5460	exosome-associated protein 3		0.707		3.28407
Tb927.11.11900	coatomer gamma	Coatomer	0.747	0.723857	12.5142	12.0355	PMID: 21363968
Tb927.11.14900	coatomer epsilon		0.707		13.3333
Tb927.1.2570	coatomer beta		0.72		13.2248
Tb927.10.4270	coatomer zeta		0.725		7.24638
Tb927.2.6050	beta prime COP protein		0.718		11.2928
Tb927.4.450	coatomer alpha		0.716		12.8528
Tb927.8.5250	coatomer delta		0.734		13.7845
Tb927.3.3180	Nucleoporin NUP98	Nuclear pore complex	0.72	0.725567	4.69956	7.74432	PMID: 19525551
Tb927.10.8910	Nucleoporin NUP181		0.727		1.2012
Tb927.9.14240	Nucleoporin NUP82		0.747		6.64011
Tb927.10.7630	transportin2- like protein		0.704		3.53857
Tb927.4.2880	Nucleoporin NUP225		0.725		2.7362
Tb927.8.8050	Nucleoporin NUP75		0.718		0.900901
Tb927.11.11090	Nucleoporin NUP140		0.72		0.682594
Tb927.11.2950	Nucleoporin NUP89		0.734		7.52823
Tb927.11.330	Myosin-like protein 1		0.709		2.36887
Tb927.9.3760	Nucleoporin GLE2		0.682		12.381
Tb927.11.15560	Nucleoporin NUP53a		0.715		1.23457
Tb927.11.15990	Nucleoporin NUP109		0.723		4.65735
Tb927.4.5200	Nucleoporin NUP62		0.712		2.07684
Tb927.3.3540	Nucleoporin NUP53b		0.757		5.20833
Tb927.10.8170	Nucleoporin NUP144		0.718		7.79286
Tb927.11.4540	Nucleoporin NUP48		0.715		2.20264
Tb927.11.11080	Nucleoporin NUP149		0.729		2.31481
Tb927.10.7060	Nucleoporin NUP96		0.728		9.04977
Tb927.11.15370	Importin subunit beta-4, putative		0.736		15.8434
Tb927.9.1340	Myosin-like protein 2		0.719		1.638
Tb927.11.2670	Nucleoporin NUP59		0.734		12.21
Tb927.7.2300	Nucleoporin NUP132		0.708		5.5371
Tb927.6.2640	importin alpha subunit, putative		0.727		9.98752
Tb927.4.4310	Nucleoporin NUP64		0.719		3.20513
Tb927.10.2900	importin beta-1 subunit, putative		0.722		8.45829
Tb927.11.980	Nucleoporin NUP158		0.737		5.79151
Tb927.7.5760	nuclear transport factor 2 protein, putative		0.688		17.1569
Tb927.10.14180	protein transport protein SEC13		0.728		14.2222
Tb927.11.3380	Ran-binding protein 1, putative		0.761		27.4262
Tb927.3.1120	GTP-binding nuclear protein rtb2, putative		0.805		33.6391
Tb927.3.5500	DNA-directed RNA polymerase II subunit 3, putative	RNA Pol-II	0.703	0.730923	7.88955	5.68576	PMID: 16621069
Tb927.11.7280	DNA-direcetd RNA polymerase II, subunit 9, putative		0.746		4.97512
Tb927.8.7400	RNA polymerase IIA largest subunit		0.741		4.53001
Tb927.4.5020	DNA-directed RNA polymerase II subunit RPB1		0.739		0
Tb927.4.3810	DNA-directed RNA polymerase II subunit 2, putative		0.74		9.79569
Tb927.3.5270	DNA-directed RNA polymerases II subunit, putative		0.684		4.08998
Tb927.11.2200	DNA-directed RNA polymerase II, putative		0.764		15.0376
Tb927.4.3490	DNA-directed RNA polymerases II and III subunit RPB6, putative		0.776		6.89655
Tb927.11.14490	RNA polymerase subunit, putative		0.681		6.9808
Tb927.3.1250	DNA-directed RNA polymerase I subunit RPB10		0.74		3.92157
Tb927.10.13320	DNA-directed RNA polymerase II/III subunit, putative		0.706		7.57576
Tb927.1.1170	DNA-directed RNA polymerase 2, RPB12 subunit		0.758		0
Tb927.11.7930	RNA polymerase B subunit RPB8, putative		0.724		2.22222
Tb927.3.4000	sigma subunit (AP-1s)	Adaptin-1	0.672	0.73275	8.33333	12.5263	PMID: 22278056
Tb927.10.8040	beta subunit (BAD1; AP-1b)		0.753		10.0575
Tb927.4.760	gamma subunit (AP-1g)		0.756		12.4688
Tb927.7.3180	mu subunit (AP-1u)		0.75		19.2456
Tb927.10.10140	paraflagellar rod component, putative	Paraflagellar rod	0.743	0.732895	20.0803	15.373	PMID: 19074134
Tb927.10.11300	paraflagellar rod component, putative		0.747		36.7454
Tb927.10.13330	paraflagellar rod component, putative		0.693		0
Tb927.10.15250	paraflagellar rod component, putative		0.735		17.8326
Tb927.10.8930	paraflagellar rod component, putative		0.711		11.2518
Tb927.10.9570	paraflagellar rod component, putative		0.698		19.0828
Tb927.11.11210	paraflagellar rod component, putative		0.736		9.23361
Tb927.11.14880	Paraflagellar Rod Proteome Component 9, putative		0.766		14.3369
Tb927.11.4740	paraflagellar rod component, putative		0.724		0.647249
Tb927.2.2160	paraflagellar rod component, putative		0.721		19.1919
Tb927.2.3660	paraflagellar rod component, putative		0.711		0
Tb927.3.3750	paraflagellar rod component, putative		0.733		24.4821
Tb927.3.3770	paraflagellar rod component, putative		0.764		27.8746
Tb927.6.3670	paraflagellar rod component, putative		0.69		0.517117
Tb927.6.4140	paraflagellar rod component, putative		0.779		20.1149
Tb927.7.1920	paraflagellar rod component, putative		0.715		12.8676
Tb927.8.1550	paraflagellar rod component, putative		0.774		25.246
Tb927.8.3790	paraflagellar rod component, putative		0.702		13.3929
Tb927.8.6660	paraflagellar rod component, putative		0.783		19.1886
Tb927.10.5380	intraflagellar transport protein 122	Intraflagellar transport	0.717	0.7325	12.6039	13.6147	PMID: 21363968
Tb927.5.3030	Intraflagellar transport protein 121		0.737		10.838
Tb927.3.1110	Putative intraflagellar transport protein A1		0.723		9.7629
Tb927.11.260	Putative intraflagellar transport protein F6		0.711		11.2994
Tb927.2.4530	hypothetical protein, conserved		0.75		9.80392
Tb927.11.1740	intraflagellar transport protein 88		0.739		16.2297
Tb927.10.14980	intraflagellar transport protein 52		0.735		12.1951
Tb927.3.5490	Putative intraflagellar transport protein B2		0.73		10.1449
Tb927.10.1170	intraflagellar transport protein 172		0.75		15.4462
Tb927.10.14990	intraflagellar transport protein 80		0.722		13.6228
Tb927.6.3290	intraflagellar transport protein 20		0.738		17.8117
Tb927.3.3000	Putative intraflagellar transport protein C3		0.779		11.1699
Tb927.7.3370	Intraflagellar transport protein 74, putative		0.753		21.7755
Tb927.10.2640	intraflagellar transport protein 81		0.727		20.3728
Tb927.10.11310	intraflagellar transport protein 57/55		0.698		12.0773
Tb927.3.5550	intraflagellar transport protein 27		0.711		12.6812
Tb927.4.590	hypothetical protein, conserved (EMC1)	ER membrane complex	0.714	0.7354	9.36101	8.13952	PMID: 26150481
Tb927.7.6260	hypothetical protein, conserved (EMC2)		0.753		9.28793
Tb927.6.2600	hypothetical protein, conserved (EMC4)		0.758		6.94444
Tb927.7.1290	hypothetical protein, conserved (EMC7)		0.682		4.11523
Tb927.8.1570	hypothetical protein, conserved (EMC8)		0.77		10.989
Tb927.5.1300	a subunit	V-ATPase (o sector)	0.751	0.7355	10.2041	5.17867	PMID: 26150481
Tb927.8.2100	c' subunit		0.77		4.01606
Tb927.6.5050	c'' subunit		0.704		2.96296
Tb927.10.200	c subunit		0.744		3.47222
Tb927.5.550	d subunit		0.754		10.4167
Tb927.11.8130	e subunit		0.69		0
Tb927.10.3520	protease regulatory ATPase subunit 4	Proteasome	0.739	0.738065	16.6667	14.8915	PMID: 12213827
Tb927.8.5740	proteasome 26S non-ATPase subunit 9, putative		0.688		7.47384
Tb927.3.5520	26S proteasome regulatory non-ATPase subunit		0.745		13.8889
Tb927.7.4420	proteasome alpha 3 subunit, putative		0.742		19.7445
Tb927.10.4710	proteasome subunit beta type-2, putative		0.727		12.8824
Tb927.11.7270	proteasome beta 3 subunit, putative		0.771		11.3269
Tb927.10.6030	proteasome subunit alpha type-1, putative		0.745		23.7203
Tb927.10.2980	proteasome regulatory non-ATPase subunit 11		0.719		13.0719
Tb927.10.6080	proteasome subunit beta type-5, putative		0.753		9.6463
Tb927.10.1550	proteasome regulatory non-ATP-ase subunit 5		0.749		15.873
Tb927.7.4790	proteasome beta 6 subunit		0.768		11.583
Tb927.6.1260	proteasome beta-1 subunit, putative		0.733		11.7786
Tb927.11.9220	proteasome regulatory non-ATP-ase subunit 2		0.745		9.54329
Tb927.2.2440	proteasome regulatory non-ATPase subunit 6		0.763		15.5642
Tb927.11.16030	proteasome regulatory non-ATP-ase subunit 7		0.747		10.8333
Tb927.7.2500	proteasome regulatory ATPase subunit 1		0.772		14.4597
Tb927.11.2130	proteasome regulatory non-ATP-ase subunit 3		0.764		17.9104
Tb927.10.9740	Regulatory particle triple-A ATPase subunit 6		0.73		17.1149
Tb927.7.2550	proteasome regulatory ATPase subunit 5		0.755		20.1794
Tb927.11.3740	proteasome regulatory ATPase subunit 2		0.74		15.2207
Tb927.10.15720	proteasome regulatory non-ATP-ase subunit 9		0.73		13.1363
Tb927.8.570	proteasome regulatory non-ATP-ase subunit 10		0.693		10.0402
Tb927.3.780	proteasome alpha 7 subunit		0.733		18.2073
Tb927.6.1090	proteasome regulatory ATPase subunit 3		0.713		18.1518
Tb927.10.14530	19S proteasome non-atpase subunit 8		0.72		7.8534
Tb927.9.9670	proteasome alpha 1 subunit, putative		0.747		22.5764
Tb927.10.290	proteasome alpha 2 subunit, putative		0.72		21.5517
Tb927.9.11330	proteasome beta 2 subunit, putative		0.744		10.4167
Tb927.10.230	proteasome subunit alpha type-5, putative		0.732		16.1943
Tb927.4.430	proteasome beta 7 subunit		0.698		12.1766
Tb927.11.7020	proteasome alpha 7 subunit, putative		0.755		22.8495
Tb927.4.1080	A subunit	V-ATPase (1 sector)	0.782	0.739	17.4577	13.3122	PMID: 26150481
Tb927.11.11690	B subunit		0.769		22.8495
Tb927.11.7480	C subunit		0.729		1.66667
Tb927.10.3760	D subunit		0.741		12.9108
Tb927.11.9420	E subunit		0.763		16.8971
Tb927.1.3820	F subunit		0.688		4.97512
Tb927.8.2310	G subunit		0.706		21.2121
Tb927.10.730	H subunit		0.734		8.52878
Tb927.6.1510	lysyl-tRNA synthetase, putative	tRNA synthetases	0.695	0.7408	0	14.9831	PMID: 21363968
Tb927.10.1500	methionyl-tRNA synthetase, putative		0.769		18.5185
Tb927.8.2240	Tryptophanyl-tRNA synthetase 2		0.713		0
Tb927.10.1260	aspartyl-tRNA synthetase, putative		0.732		1.23001
Tb927.7.2400	tyrosyl-tRNA synthetase, putative		0.732		10.1721
Tb927.7.3620	tyrosyl-tRNA synthetase, putative		0.755		13.3715
Tb927.3.5580	tryptophanyl-tRNA synthetase		0.716		7.69231
Tb927.8.5330	tyrosyl/methionyl-tRNA synthetase, putative		0.75		19.3452
Tb927.8.1600	lysyl-tRNA synthetase, putative		0.739		17.094
Tb927.6.2060	histidyl-tRNA synthetase		0.733		12.5523
Tb927.11.1990	arginyl-tRNA synthetase, putative		0.759		18.759
Tb927.11.3730	leucyl-tRNA synthetase, putative		0.743		16.7442
Tb927.6.4590	glutamyl-tRNA synthetase, putative		0.679		24.6277
Tb927.11.2360	phenylalanyl-tRNA synthetase (beta subunit), putative		0.747		16
Tb927.6.4480	valyl-tRNA synthetase, putative		0.775		16.735
Tb927.11.9640	glycyl-tRNA synthetase, putative		0.741		17.6
Tb927.6.700	alanyl-tRNA synthetase, putative		0.758		17.9249
Tb927.4.2310	asparaginyl-tRNA synthetase, putative		0.744		14.9701
Tb927.5.1090	threonyl-tRNA synthetase, putative		0.765		22.9167
Tb927.11.7170	seryl-tRNA synthetase		0.76		25.6944
Tb927.9.5210	glutaminyl-tRNA synthetase, putative		0.762		16.7243
Tb927.11.14120	phenylalanyl-tRNA synthetase alpha chain, putative		0.727		12.0724
Tb927.6.950	cysteinyl-tRNA synthetase, putative		0.728		16.9635
Tb927.10.9190	isoleucyl-tRNA synthetase, putative		0.756		17.316
Tb927.10.12890	bifunctional aminoacyl-tRNA synthetase, putative		0.742		19.5531
Tb927.7.570	prefoldin, putative	Prefoldin	0.749	0.747625	20.202	14.5369
Tb927.7.2590	prefoldin, putative		0.777		7.79727
Tb927.11.12680	prefoldin subunit 2, putative		0.777		18.2648
Tb927.5.580	prefoldin subunit, putative		0.719		22.0588
Tb927.6.2280	prefoldin subunit, putative		0.763		26.1905
Tb927.11.800	prefoldin subunit, putative		0.782		18.6667
Tb927.11.16040	prefoldin subunit, putative		0.704		0
Tb927.11.12910	prefoldin subunit, putative		0.71		3.11526
Tb927.7.7420	alpha	ATP synthase (F1)	0.781	0.7544	16.5242	16.7571	PMID: 19436713
Tb927.3.1380	beta		0.813		16.6667
Tb927.6.4990	delta		0.722		20.0364
Tb927.10.5050	epsilon		0.737		8.77193
Tb927.10.180	gamma		0.719		21.7865
Tb927.8.3150	T-complex protein 1, gamma subunit, putative	TCP-1 chaperone	0.801	0.76325	25.1346	23.208	PMID: 21363968
Tb927.10.8190	T-complex protein 1, theta subunit, putative		0.756		20.4461
Tb927.11.16760	T-complex protein 1, alpha subunit, putative		0.79		18.686
Tb927.11.14250	T-complex protein 1, epsilon subunit, putative		0.771		24.7372
Tb927.10.1060	T-complex protein 1, delta subunit, putative		0.767		23.5878
Tb927.11.3240	T-complex protein 1, zeta subunit, putative		0.737		20.7951
Tb927.11.1900	T-complex protein 1, beta subunit, putative		0.751		27.673
Tb927.9.11270	t- complex protein 1 (eta subunit), putative		0.733		24.6046
Tb927.3.1790	pyruvate dehydrogenase E1 beta subunit	Pyruvate dehydrigenase	0.757	0.76925	19.1022	23.5254	PMID: 21363968
Tb927.10.7570	dihydrolipoamide acetyltransferase E2 subunit		0.759		21.3864
Tb927.10.12700	pyruvate dehydrogenase E1 alpha subunit		0.756		29.9033
Tb927.11.16730	dihydrolipoyl dehydrogenase		0.805		23.7099

## Sheet: Sheet 4. T. brucei CAI set
GeneID	CAI	CDS length [L] (kbp)	Relative predicted expression = CAI*(sqrt-L*0.03)	Product Description
Tb927.8.5260	0.876	0.156	0.864151	60S ribosomal protein L39, putative	Reference-set for the CAI calculator
Tb927.10.11390	0.871	0.579	0.848172	60S ribosomal protein L6, putative
Tb927.1.2340	0.883	1.356	0.848066	alpha tubulin
Tb927.1.2360	0.883	1.356	0.848066	alpha tubulin
Tb927.1.2380	0.883	1.356	0.848066	alpha tubulin
Tb927.1.2400	0.883	1.356	0.848066	alpha tubulin
Tb927.11.3230	0.865	0.321	0.848003	60S ribosomal protein L44
Tb927.9.2020	0.857	0.249	0.84203	60S ribosomal protein L38, putative
Tb927.10.10460	0.859	0.339	0.841533	histone H2B, putative
Tb927.10.10590	0.859	0.339	0.841533	histone H2B, putative
Tb927.10.10470	0.859	0.339	0.841533	histone H2B, putative
Tb927.10.10480	0.859	0.339	0.841533	histone H2B, putative
Tb927.10.10490	0.859	0.339	0.841533	histone H2B, putative
Tb927.10.10500	0.859	0.339	0.841533	histone H2B, putative
Tb927.10.10510	0.859	0.339	0.841533	histone H2B, putative
Tb927.10.10520	0.859	0.339	0.841533	histone H2B, putative
Tb927.10.10530	0.859	0.339	0.841533	histone H2B, putative
Tb927.10.10540	0.859	0.339	0.841533	histone H2B, putative
Tb927.10.10550	0.859	0.339	0.841533	histone H2B, putative
Tb927.10.10560	0.859	0.339	0.841533	histone H2B, putative
Tb927.10.10570	0.859	0.339	0.841533	histone H2B, putative
Tb927.10.10580	0.859	0.339	0.841533	histone H2B, putative
Tb927.1.2370	0.875	1.329	0.840415	beta tubulin
Tb927.10.2090	0.875	1.35	0.840143	elongation factor 1-alpha
Tb927.10.2100	0.875	1.35	0.840143	elongation factor 1-alpha
Tb927.10.2110	0.875	1.35	0.840143	elongation factor 1-alpha
Tb927.1.2330	0.874	1.329	0.839415	beta tubulin
Tb927.1.2390	0.874	1.329	0.839415	beta tubulin
Tb927.1.2350	0.873	1.329	0.838415	beta tubulin
Tb927.9.13860	0.853	0.279	0.837154	kinetoplastid membrane protein 11-2
Tb927.1.3180	0.856	0.525	0.834263	40S ribosomal protein S11, putative
Tb927.10.9800	0.853	0.393	0.834193	60S ribosomal protein L22
Tb927.11.2060	0.863	0.975	0.833377	60S acidic ribosomal protein P0, putative
Tb927.11.2050	0.862	0.975	0.832377	60S acidic ribosomal protein P0, putative
Tb927.11.11830	0.852	0.429	0.832351	40S ribosomal protein S17, putative
Tb927.9.11490	0.85	0.438	0.830146	60S ribosomal protein L29
Tb927.9.11470	0.85	0.438	0.830146	60S ribosomal protein L29
Tb927.8.6150	0.854	0.663	0.829573	40S ribosomal protein S8, putative
Tb927.11.11820	0.849	0.429	0.829351	40S ribosomal protein S17, putative
Tb927.9.13820	0.845	0.279	0.829154	kinetoplastid membrane protein 11-3
Tb927.9.13920	0.845	0.279	0.829154	kinetoplastid membrane protein 11-1
Tb927.8.6160	0.853	0.663	0.828573	40S ribosomal protein S8, putative
Tb927.7.2820	0.844	0.405	0.824908	histone H2A, putative
Tb927.1.2430	0.843	0.402	0.823979	histone H3, putative
Tb927.1.2450	0.843	0.402	0.823979	histone H3, putative
Tb927.1.2470	0.843	0.402	0.823979	histone H3, putative
Tb927.1.2510	0.843	0.402	0.823979	histone H3, putative
Tb927.1.2530	0.843	0.402	0.823979	histone H3, putative
Tb927.1.2550	0.843	0.402	0.823979	histone H3, putative
Tb927.11.8200	0.841	0.336	0.82361	ribosomal protein S26, putative
Tb927.10.1590	0.839	0.33	0.821766	ribosomal protein L36, putative
Tb927.11.10160	0.84	0.393	0.821193	60S ribosomal protein L22, putative
Tb927.6.4280	0.852	1.08	0.820823	glyceraldehyde 3-phosphate dehydrogenase, glycosomal
Tb927.6.4300	0.852	1.08	0.820823	glyceraldehyde 3-phosphate dehydrogenase, glycosomal
Tb927.10.14580	0.842	0.501	0.820766	60S ribosomal protein L17, putative
Tb927.8.1110	0.843	0.573	0.820291	40S ribosomal protein S9, putative
Tb927.10.560	0.842	0.525	0.820263	40S ribosomal proteins S11, putative
Tb927.7.2830	0.839	0.405	0.819908	histone H2A, putative
Tb927.7.2840	0.839	0.405	0.819908	histone H2A, putative
Tb927.7.2850	0.839	0.405	0.819908	histone H2A, putative
Tb927.7.2880	0.839	0.405	0.819908	histone H2A, putative
Tb927.7.2890	0.839	0.405	0.819908	histone H2A, putative
Tb927.7.2900	0.839	0.405	0.819908	histone H2A, putative
Tb927.7.2910	0.839	0.405	0.819908	histone H2A, putative
Tb927.7.2920	0.839	0.405	0.819908	histone H2A, putative
Tb927.7.2930	0.839	0.405	0.819908	histone H2A, putative
Tb927.7.2860	0.839	0.405	0.819908	histone H2A, putative
Tb927.7.2870	0.839	0.405	0.819908	histone H2A, putative
Tb927.7.2940	0.839	0.405	0.819908	histone H2A, putative
Tb927.1.2490	0.838	0.402	0.818979	histone H3, putative
Tb927.10.5610	0.841	0.573	0.818291	40S ribosomal protein S9, putative
Tb927.10.3280	0.832	0.249	0.81703	60S ribosomal proteins L38, putative
Tb927.7.1730	0.842	0.729	0.816386	60S ribosomal protein L7, putative
Tb927.7.1740	0.842	0.729	0.816386	60S ribosomal protein L7, putative
Tb927.7.1750	0.842	0.729	0.816386	60S ribosomal protein L7, putative
Tb927.9.15110	0.845	0.927	0.816116	60S ribosomal protein L5, putative
Tb927.10.3930	0.842	0.771	0.815658	40S ribosomal protein S3A, putative
Tb927.8.6760	0.837	0.513	0.815513	IgE-dependent histamine-releasing factor, putative
Tb927.10.7340	0.834	0.414	0.814697	40S ribosomal protein S24E, putative
Tb927.9.15170	0.843	0.927	0.814116	60S ribosomal protein L5, putative
Tb927.7.5170	0.835	0.495	0.813893	60S ribosomal protein L25
Tb927.7.5180	0.835	0.495	0.813893	60S ribosomal protein L23a, putative
Tb927.10.7330	0.832	0.414	0.812697	40S ribosomal protein S24E, putative
Tb927.3.3310	0.837	0.657	0.812683	60S ribosomal protein L13, putative
Tb927.3.3320	0.837	0.657	0.812683	60S ribosomal protein L13, putative
Tb927.10.3940	0.839	0.771	0.812658	40S ribosomal protein S3A, putative
Tb927.10.14600	0.839	0.801	0.81215	40S ribosomal protein S2, putative
Tb927.10.14710	0.839	0.801	0.81215	40S ribosomal protein S2, putative
Tb927.10.1080	0.831	0.432	0.811282	40S ribosomal protein S23, putative
Tb927.10.1090	0.831	0.432	0.811282	40S ribosomal protein S23, putative
Tb927.8.6750	0.832	0.513	0.810513	translationally controlled tumor protein (TCTP), putative
Tb927.7.5000	0.837	0.783	0.810454	60S ribosomal protein L19, putative
Tb927.7.5020	0.837	0.783	0.810454	60S ribosomal protein L19, putative
Tb927.7.1050	0.829	0.45	0.808875	40S ribosomal protein S16, putative
Tb927.11.9720	0.824	0.261	0.808674	40S ribosomal protein S27, putative
Tb927.11.6300	0.831	0.573	0.808291	40S ribosomal protein S5, putative
Tb927.7.1040	0.828	0.45	0.807875	40S ribosomal protein S16, putative
Tb927.9.14370	0.827	0.432	0.807282	60S ribosomal protein L26, putative
Tb927.8.6030	0.828	0.495	0.806893	60S ribosomal protein L12, putative
Tb927.10.4120	0.823	0.345	0.805379	60S ribosomal protein L30
Tb927.11.3000	0.82	0.255	0.804851	60S ribosomal protein L37, putative
Tb927.3.3270	0.841	1.464	0.804701	ATP-dependent 6-phosphofructokinase, glycosomal
Tb927.7.2340	0.825	0.459	0.804675	40S ribosomal protein S15, putative
Tb927.7.2370	0.825	0.459	0.804675	40S ribosomal protein S15, putative
Tb927.9.4960	0.816	0.147	0.804498	hypothetical protein, conserved
Tb927.5.4190	0.821	0.303	0.804486	histone H4, putative
Tb927.5.4210	0.821	0.303	0.804486	histone H4, putative
Tb927.5.4220	0.821	0.303	0.804486	histone H4, putative
Tb927.5.4230	0.821	0.303	0.804486	histone H4, putative
Tb927.3.4330	0.844	1.77	0.804088	Paraflagellar rod protein 1-5
Tb927.11.2930	0.822	0.366	0.803851	membrane-associated protein, putative
Tb927.6.720	0.826	0.57	0.80335	40S ribosomal protein L14, putative
Tb927.10.220	0.819	0.282	0.803069	60S ribosomal protein L37a, putative
Tb927.9.15210	0.82	0.33	0.802766	ribosomal protein L36, putative
Tb927.5.4180	0.819	0.303	0.802486	histone H4, putative
Tb927.3.4290	0.842	1.77	0.802088	Paraflagellar rod protein 1-1
Tb927.3.4300	0.842	1.77	0.802088	Paraflagellar rod protein 1-2
Tb927.3.4310	0.842	1.77	0.802088	Paraflagellar rod protein 1-3
Tb927.3.4320	0.842	1.77	0.802088	Paraflagellar rod protein 1-4
Tb927.11.1860	0.816	0.231	0.801581	histone H1
Tb927.10.13500	0.825	0.645	0.800906	60S ribosomal protein L10a
Tb927.6.2100	0.814	0.201	0.80055	40S ribosomal protein S30, putative
Tb927.11.11330	0.842	1.986	0.799722	heat shock protein 70
Tb927.4.3550	0.824	0.669	0.799462	60S ribosomal protein L13a, putative
Tb927.11.1800	0.814	0.243	0.799211	histone H1
Tb927.10.4110	0.816	0.318	0.799083	60S ribosomal protein L30
Tb927.9.4680	0.832	1.215	0.798932	Eukaryotic initiation factor 4A-1
Tb927.8.4970	0.839	1.803	0.798717	Paraflagellar rod protein 2-1
Tb927.8.4980	0.839	1.803	0.798717	Paraflagellar rod protein 2-2
Tb927.8.4990	0.839	1.803	0.798717	Paraflagellar rod protein 2-3
Tb927.8.5000	0.839	1.803	0.798717	Paraflagellar rod protein 2-4
Tb927.8.5010	0.839	1.803	0.798717	Paraflagellar rod protein 2-5
Tb927.5.4170	0.815	0.303	0.798486	histone H4, putative
Tb927.5.4200	0.815	0.303	0.798486	histone H4, putative
Tb927.5.4240	0.815	0.303	0.798486	histone H4, putative
Tb927.5.4250	0.815	0.303	0.798486	histone H4, putative
Tb927.5.4260	0.815	0.303	0.798486	histone H4, putative
Tb927.3.1370	0.816	0.342	0.798456	40S ribosomal protein S25, putative
Tb927.11.16280	0.825	0.783	0.798454	60S ribosomal protein L8, putative
Tb927.10.4120	0.816	0.345	0.798379	60S ribosomal protein L30
Tb927.4.4990	0.812	0.216	0.798057	ubiquinol-cytochrome c reductase, putative
Tb927.11.5520	0.824	0.753	0.797967	triosephosphate isomerase
Tb927.11.9710	0.822	0.645	0.797906	60S ribosomal protein L10a, putative
Tb927.9.9210	0.813	0.255	0.797851	60S ribosomal protein L37, putative
Tb927.4.1860	0.819	0.504	0.797702	ribosomal protein S19, putative
Tb927.10.6070	0.817	0.423	0.797488	universal minicircle sequence binding protein 1
Tb927.11.14020	0.824	0.84	0.796505	nuclear RNA binding domain 2
Tb927.11.14000	0.823	0.789	0.796352	nuclear RNA binding domain 1
Tb927.5.1000	0.816	0.447	0.795943	ubiquitin-conjugating enzyme E2, putative
Tb927.9.9100	0.811	0.255	0.795851	hypothetical protein, conserved
Tb927.5.1160	0.82	0.687	0.795134	Degradation arginine-rich protein for mis-folding, putative
Tb927.10.5030	0.815	0.456	0.794742	ubiquitin/ribosomal protein S27a, putative
Tb927.10.5620	0.826	1.119	0.794265	fructose-bisphosphate aldolase, glycosomal
Tb927.11.600	0.81	0.279	0.794154	Mitochondrial ATP synthase subunit, putative
Tb927.4.2180	0.814	0.45	0.793875	60S ribosomal protein L35a, putative
Tb927.7.1470	0.811	0.354	0.793151	Mitochondrial ATP synthase subunit c-3
Tb927.10.6370	0.809	0.282	0.793069	60S ribosomal proteins L37, putative
Tb927.9.1810	0.811	0.384	0.79241	60S ribosomal protein L35, putative
Tb927.9.1850	0.811	0.384	0.79241	60S ribosomal protein L35, putative
Tb927.10.1570	0.81	0.357	0.792075	Mitochondrial ATP synthase subunit c-2
Tb927.10.5330	0.812	0.462	0.791609	40S ribosomal protein S18, putative
Tb927.11.15880	0.81	0.402	0.790979	60S ribosomal protein L27, putative
Tb927.11.15900	0.81	0.402	0.790979	60S ribosomal protein L27, putative
Tb927.10.5340	0.811	0.462	0.790609	40S ribosomal protein S18, putative
Tb927.10.10980	0.834	2.115	0.790371	heat shock protein 90, putative
Tb927.10.10940	0.834	2.115	0.790371	heat shock protein, putative
Tb927.10.10950	0.834	2.115	0.790371	heat shock protein, putative
Tb927.10.10960	0.834	2.115	0.790371	heat shock protein, putative
Tb927.10.10970	0.834	2.115	0.790371	heat shock protein, putative
Tb927.10.10930	0.834	2.115	0.790371	heat shock protein, putative
Tb927.10.4560	0.838	2.541	0.790178	elongation factor 2
Tb927.10.4570	0.838	2.541	0.790178	elongation factor 2
Tb927.9.6070	0.814	0.645	0.789906	40S ribosomal protein S3, putative
Tb927.10.12680	0.811	0.513	0.789513	60S ribosomal protein L34, putative
Tb927.8.3530	0.82	1.065	0.78904	glycerol-3-phosphate dehydrogenase [NAD+], glycosomal
Tb927.9.5690	0.806	0.342	0.788456	60S acidic ribosomal protein, putative
Tb927.10.10890	0.832	2.115	0.788371	heat shock protein, putative
Tb927.10.10900	0.832	2.115	0.788371	heat shock protein, putative
Tb927.10.10910	0.832	2.115	0.788371	heat shock protein, putative
Tb927.11.9530	0.815	0.789	0.788352	14-3-3 protein 1
Tb927.10.14140	0.825	1.5	0.788258	pyruvate kinase 1
Tb927.11.6510	0.811	0.585	0.788054	40S ribosomal protein S21, putative
Tb927.7.6770	0.804	0.294	0.787733	Acyl CoA binding protein, putative
Tb927.10.10920	0.831	2.115	0.787371	heat shock protein, putative
Tb927.11.10790	0.813	0.735	0.78728	40S ribosomal protein SA, putative
Tb927.11.10910	0.813	0.735	0.78728	40S ribosomal protein SA, putative
Tb927.4.3570	0.812	0.681	0.787243	translation elongation factor 1-beta, putative
Tb927.4.3590	0.812	0.681	0.787243	translation elongation factor 1-beta, putative
Tb927.11.6200	0.807	0.441	0.787078	60S ribosomal protein L28, putative
Tb927.10.2840	0.804	0.342	0.786456	ribosomal protein S25, putative
Tb927.11.4820	0.807	0.501	0.785766	60S ribosomal protein L17, putative
Tb927.9.15190	0.809	0.615	0.785473	ribosomal protein L15, putative
Tb927.9.10230	0.806	0.507	0.784639	Co-chaperone protein P23
Tb927.11.9590	0.819	1.314	0.784611	S-adenosylhomocysteine hydrolase, putative
Tb927.9.11380	0.804	0.42	0.784558	60S ribosomal protein L23, putative
Tb927.10.5460	0.803	0.378	0.784555	60S ribosomal protein L24, putative
Tb927.5.1110	0.811	0.783	0.784454	60S ribosomal protein L8, putative
Tb927.11.4300	0.807	0.582	0.784113	60S ribosomal protein L18, putative
Tb927.11.5280	0.802	0.357	0.784075	Mitochondrial ATP synthase subunit c-1
Tb927.9.14000	0.805	0.495	0.783893	60S ribosomal protein L12, putative
Tb927.8.1330	0.811	0.831	0.783652	60S ribosomal protein L7a, putative
Tb927.8.1340	0.811	0.831	0.783652	60S ribosomal protein L7a, putative
Tb927.10.5480	0.802	0.378	0.783555	60S ribosomal protein L24, putative
Tb927.11.9730	0.805	0.513	0.783513	60S ribosomal protein L34, putative
Tb927.8.6180	0.803	0.432	0.783282	60S ribosomal protein L26, putative
Tb927.11.6180	0.803	0.441	0.783078	60S ribosomal protein L28, putative
Tb927.5.1610	0.807	0.669	0.782462	60S ribosomal protein L13a, putative
Tb927.9.7620	0.805	0.585	0.782054	60S ribosomal protein L11, putative
Tb927.7.4520	0.805	0.606	0.781646	Thioredoxin-like, putative
Tb927.7.1320	0.798	0.303	0.781486	10 kDa heat shock protein, putative
Tb927.7.1340	0.798	0.303	0.781486	10 kDa heat shock protein, putative
Tb927.6.4980	0.801	0.435	0.781214	40S ribosomal protein S14
Tb927.9.15360	0.807	0.753	0.780967	40S ribosomal protein S6, putative
Tb927.10.6060	0.805	0.642	0.780963	universal minicircle sequence binding protein 2
Tb927.3.1120	0.805	0.654	0.780739	GTP-binding nuclear protein rtb2, putative
Tb927.3.5050	0.812	1.125	0.78018	60S ribosomal protein L4
Tb927.11.16130	0.8	0.462	0.779609	nucleoside diphosphate kinase
Tb927.9.11410	0.799	0.42	0.779558	60S ribosomal protein L23, putative
Tb927.9.8100	0.802	0.567	0.77941	nascent polypeptide associated complex subunit, putative
Tb927.9.8130	0.802	0.567	0.77941	nascent polypeptide associated complex subunit, putative
Tb927.9.7590	0.802	0.585	0.779054	60S ribosomal protein L11, putative
Tb927.3.5180	0.798	0.411	0.778767	cofilin/actin depolymerizing factor, putative
Tb927.6.5040	0.802	0.615	0.778473	ribosomal protein L15, putative
Tb927.4.2330	0.793	0.243	0.778211	hypothetical protein, conserved
Tb927.6.4130	0.795	0.315	0.778163	succinate dehydrogenase subunit 3
Tb927.10.11540	0.802	0.645	0.777906	40S ribosomal protein S3, putative
Tb927.11.13020	0.798	0.45	0.777875	calmodulin
Tb927.11.13030	0.798	0.45	0.777875	calmodulin
Tb927.11.13040	0.798	0.45	0.777875	calmodulin
Tb927.11.13050	0.798	0.45	0.777875	calmodulin
Tb927.11.11230	0.8	0.57	0.77735	60S ribosomal protein L14, putative
Tb927.11.16710	0.795	0.357	0.777075	hypothetical protein, conserved
Tb927.1.3950	0.814	1.515	0.777074	alanine aminotransferase
Tb927.11.7510	0.819	1.962	0.776979	luminal binding protein 1 (BiP), putative
Tb927.4.1790	0.811	1.29	0.776927	ribosomal protein L3, putative
Tb927.4.1800	0.811	1.29	0.776927	Mitochondrial ribosomal protein L3
Tb927.9.9260	0.798	0.495	0.776893	hypothetical protein, conserved
Tb927.9.12550	0.814	1.539	0.776783	glycerol kinase, glycosomal
Tb927.9.12590	0.814	1.539	0.776783	glycerol kinase, glycosomal
Tb927.9.12570	0.814	1.539	0.776783	glycerol kinase, glycosomal
Tb927.10.1100	0.799	0.57	0.77635	60S ribosomal protein L9, putative
Tb927.10.5300	0.802	0.747	0.776071	eukaryotic translation initiation factor 6 (eIF-6), putative
Tb927.11.7460	0.818	1.962	0.775979	luminal binding protein 1 (BiP), putative
Tb927.10.2890	0.81	1.29	0.775927	enolase
Tb927.11.5960	0.793	0.324	0.775924	hypothetical protein, conserved
Tb927.11.5950	0.793	0.324	0.775924	hypothetical protein, conserved
Tb927.11.11680	0.808	1.152	0.775801	2-oxoglutarate dehydrogenase E2 component, putative
Tb927.9.12610	0.813	1.539	0.775783	glycerol kinase, glycosomal
Tb927.9.12630	0.813	1.539	0.775783	glycerol kinase, glycosomal
Tb927.3.1380	0.813	1.56	0.77553	ATP synthase subunit beta, mitochondrial
Tb927.11.6500	0.798	0.591	0.774937	40S ribosomal protein S21, putative
Tb927.9.13650	0.797	0.549	0.774772	ADP-ribosylation factor, putative
Tb927.4.2530	0.795	0.477	0.77428	hypothetical protein, conserved
Tb927.9.13740	0.796	0.549	0.773772	ADP-ribosylation factor, putative
Tb927.1.2985	0.79	0.297	0.773651	ER protein Pkr1, putative
Tb927.9.12200	0.796	0.567	0.77341	60S ribosomal subunit protein L31, putative
Tb927.6.5130	0.79	0.324	0.772924	60S acidic ribosomal protein P2, putative
Tb927.9.15420	0.791	0.399	0.77205	60S ribosomal protein L32
Tb927.3.3780	0.791	0.435	0.771214	tryparedoxin 1a, putative
Tb927.5.1820	0.788	0.324	0.770924	60S acidic ribosomal protein, putative
Tb927.9.12240	0.793	0.567	0.77041	60S ribosomal subunit protein L31, putative
Tb927.4.3450	0.788	0.345	0.770379	Mitochondrial ATP synthase subunit, putative
Tb927.4.890	0.788	0.348	0.770303	small nuclear ribonucleoprotein sm d3
Tb927.11.6140	0.789	0.393	0.770193	40S ribosomal protein S15A, putative
Tb927.11.880	0.792	0.534	0.770077	cyclophilin a
Tb927.9.13710	0.792	0.549	0.769772	ADP-ribosylation factor, putative
Tb927.11.11520	0.794	0.657	0.769683	glycosomal membrane protein
Tb927.3.3760	0.789	0.435	0.769214	tryparedoxin 1b, putative
Tb927.8.4380	0.786	0.318	0.769083	Archaic translocase of outer membrane 12 kDa subunit
Tb927.11.16730	0.805	1.434	0.769075	dihydrolipoyl dehydrogenase
Tb927.11.9920	0.812	2.058	0.768963	polyubiquitin, putative
Tb927.9.8070	0.793	0.642	0.768963	QM-like protein
Tb927.9.8420	0.793	0.642	0.768963	QM-like protein
Tb927.9.5770	0.792	0.6	0.768762	tryparedoxin peroxidase
Tb927.9.5770	0.792	0.6	0.768762	tryparedoxin peroxidase
Tb927.9.5860	0.792	0.6	0.768762	tryparedoxin peroxidase
Tb927.8.7410	0.801	1.188	0.768301	calreticulin, putative
Tb927.10.9880	0.791	0.582	0.768113	60S ribosomal protein L18, putative
Tb927.11.14130	0.79	0.54	0.767955	ribosomal protein L18, putative
Tb927.11.11370	0.797	0.957	0.767652	receptor for activated C kinase 1
Tb927.1.3200	0.792	0.666	0.767517	Suppressor of G2 allele of SKP1, putative
Tb927.8.890	0.791	0.627	0.767245	Ras-related protein Rab1A
Tb927.9.13680	0.789	0.549	0.766772	ADP-ribosylation factor, putative
Tb927.7.3680	0.787	0.462	0.766609	ubiquitin/ribosomal protein S27a, putative
Tb927.8.6090	0.787	0.468	0.766477	ubiquitin-protein ligase, putative
Tb927.10.7410	0.8	1.26	0.766325	succinyl-CoA ligase [GDP-forming] beta-chain, putative
Tb927.10.10420	0.785	0.396	0.766121	monothiol glutaredoxin, putative
Tb927.7.4070	0.784	0.363	0.765925	cysteine peptidase, Clan CA, family C2, putative
Tb927.11.11360	0.795	0.957	0.765652	receptor for activated C kinase 1
Tb927.11.16540	0.782	0.297	0.765651	Roadblock/LC7 domain containing protein, putative
Tb927.4.5010	0.798	1.188	0.765301	calreticulin, putative
Tb927.7.230	0.782	0.312	0.765243	40S ribosomal protein S33, putative
Tb927.7.240	0.782	0.312	0.765243	40S ribosomal protein S33, putative
Tb927.4.1300	0.797	1.125	0.76518	amidinotransferase, putative
Tb927.9.3540	0.783	0.354	0.765151	hypothetical protein, conserved
Tb927.11.16510	0.785	0.441	0.765078	hypothetical protein, conserved
Tb927.10.3710	0.79	0.696	0.764972	proteasome activator protein PA26
Tb927.10.190	0.791	0.753	0.764967	40S ribosomal protein S6, putative
Tb927.6.5120	0.782	0.324	0.764924	60S acidic ribosomal protein P2, putative
Tb927.8.4330	0.789	0.651	0.764795	small GTP-binding protein Rab11
Tb927.10.2020	0.8	1.416	0.764301	hexokinase
Tb927.4.2040	0.787	0.573	0.764291	DNA/RNA-binding protein Alba 3
Tb927.3.960	0.778	0.21	0.764252	protein transport protein Sec61 gamma subunit, putative
Tb927.6.2270	0.79	0.753	0.763967	AdoMet dependent proline di-methyltransferase, putative
Tb927.6.2330	0.79	0.753	0.763967	RGG protein
Tb927.11.13190	0.797	1.215	0.763932	elongation factor 1 gamma, putative
Tb927.11.3590	0.791	0.822	0.763801	40S ribosomal protein S4, putative
Tb927.11.800	0.782	0.375	0.763629	prefoldin subunit, putative
Tb927.11.12860	0.792	0.909	0.763398	cAMP response protein, putative
Tb927.2.4210	0.801	1.578	0.763314	Phosphoenolpyruvate carboxykinase [ATP], glycosomal
Tb927.11.6360	0.786	0.576	0.763232	60S ribosomal protein L24, putative
Tb927.11.13090	0.796	1.215	0.762932	elongation factor 1 gamma, putative
Tb927.11.6130	0.785	0.549	0.762772	SKP1-like protein
Tb927.10.8030	0.789	0.768	0.762709	Mitochondrial ATP synthase subunit 5
Tb927.10.3370	0.78	0.345	0.762379	60S acidic ribosomal protein P2, putative
Tb927.10.3380	0.78	0.345	0.762379	60S acidic ribosomal protein P2, putative
Tb927.9.10770	0.801	1.668	0.762255	polyadenylate-binding protein 2
Tb927.8.3150	0.801	1.671	0.76222	T-complex protein 1, gamma subunit, putative
Tb927.6.2790	0.792	0.999	0.762015	L-threonine 3-dehydrogenase, putative
Tb927.7.6360	0.784	0.54	0.761955	histone H2A variant Z
Tb927.1.4160	0.783	0.501	0.761766	hypothetical protein, conserved
Tb927.6.4140	0.779	0.348	0.761303	paraflagellar rod component, putative
Tb927.3.2180	0.781	0.471	0.760411	Mitochondrial ATP synthase subunit, putative
Tb927.10.6400	0.799	1.689	0.760012	chaperonin HSP60, mitochondrial precursor
Tb927.9.10310	0.789	0.954	0.759698	mitochondrial carrier protein 11
Tb927.9.3990	0.783	0.609	0.759588	ribosomal protein S7, putative
Tb927.11.11170	0.781	0.516	0.75945	hypothetical protein, conserved
Tb927.11.15420	0.783	0.618	0.759416	eukaryotic translation initiation factor 3 subunit k
Tb927.11.11010	0.79	1.047	0.759303	hypothetical protein, conserved
Tb927.6.4440	0.789	1.059	0.758128	RNA-binding protein 42 (RNA-binding motif protein 42)
Tb927.10.6510	0.797	1.689	0.758012	chaperonin HSP60, mitochondrial precursor
Tb927.11.3600	0.785	0.822	0.757801	40S ribosomal protein S4, putative
Tb927.10.15760	0.787	0.948	0.75779	hypothetical protein, conserved
Tb927.7.1120	0.779	0.501	0.757766	trypanothione/tryparedoxin dependent peroxidase 1, cytosolic
Tb927.9.3920	0.781	0.609	0.757588	ribosomal protein S7, putative
Tb927.9.2110	0.775	0.342	0.757456	hypothetical protein, conserved
Tb927.10.15410	0.787	0.972	0.757423	glycosomal malate dehydrogenase
Tb927.11.320	0.773	0.273	0.757325	dynein light chain 1, putative
Tb927.10.2010	0.793	1.416	0.757301	hexokinase
Tb927.11.7500	0.776	0.39	0.757265	Protein of unknown function (DUF423), putative
Tb927.11.4290	0.777	0.435	0.757214	40S ribosomal protein S12
Tb927.11.12680	0.777	0.438	0.757146	prefoldin subunit 2, putative
Tb927.9.13070	0.772	0.249	0.75703	Heat shock factor binding 1 domain-containing protein
Tb927.9.10170	0.772	0.249	0.75703	predicted zinc finger protein
Tb927.2.6090	0.774	0.321	0.757003	60S ribosomal protein L44
Tb927.4.3490	0.776	0.435	0.756214	DNA-directed RNA polymerases II and III subunit RPB6, putative
Tb927.6.1240	0.773	0.321	0.756003	hypothetical protein, conserved
Tb927.6.2050	0.78	0.642	0.755963	ribosome biogenesis regulatory protein (RRS1), putative
Tb927.4.1420	0.775	0.405	0.755908	hypothetical protein, conserved
Tb927.4.2030	0.78	0.654	0.755739	DNA/RNA-binding protein Alba 4
Tb927.7.2590	0.777	0.513	0.755513	prefoldin, putative
Tb927.11.7490	0.774	0.39	0.755265	Protein of unknown function (DUF423), putative
Tb927.9.5190	0.783	0.879	0.754874	proliferative cell nuclear antigen (PCNA), putative
Tb927.7.6890	0.781	0.765	0.754761	methyltransferase domain containing protein, putative
Tb927.10.4280	0.778	0.606	0.754646	ubiquinol-cytochrome c reductase complex 14 kda protein
Tb927.10.5840	0.778	0.606	0.754646	translation elongation factor 1-beta, putative
Tb927.3.2960	0.784	0.984	0.754241	inosine-adenosine-guanosine-nucleosidehydrolase
Tb927.10.7090	0.784	0.99	0.75415	Alternative oxidase, mitochondrial
Tb927.8.1080	0.777	0.591	0.753937	centrin, putative
Tb927.4.2740	0.774	0.453	0.753808	p25-alpha, putative
Tb927.2.5850	0.771	0.336	0.75361	small nuclear ribonucleoprotein SmD2
Tb927.5.1880	0.774	0.465	0.753543	inhibitor of serine peptidase (ISP), putative
Tb927.6.4690	0.776	0.564	0.75347	60S ribosomal protein L9, putative
Tb927.4.3510	0.773	0.435	0.753214	DNA-directed RNA polymerase subunit, putative
Tb927.10.15960	0.778	0.693	0.753026	hypothetical protein, conserved
Tb927.10.3840	0.775	0.54	0.752955	60S ribosomal protein L18a, putative
Tb927.9.6290	0.784	1.071	0.752953	arginine kinase
Tb927.10.8940	0.786	1.236	0.752647	flagellum targeting protein kharon1, putative
Tb927.9.5150	0.771	0.381	0.752482	ribosomal protein S6, putative
Tb927.10.4550	0.773	0.471	0.752411	hypothetical protein, conserved
Tb927.10.8430	0.772	0.429	0.752351	40S ribosomal protein S12, putative
Tb927.5.2170	0.77	0.351	0.752226	conserved protein
Tb927.5.4030	0.768	0.279	0.752154	U6 snRNA-associated Sm-like protein LSm7p
Tb927.11.13250	0.788	1.434	0.752075	eukaryotic translation initiation factor 2 gamma, putative
Tb927.5.2560	0.766	0.222	0.751865	hypothetical protein, conserved
Tb927.8.6450	0.77	0.366	0.751851	inhibitor of cysteine peptidase
Tb927.11.740	0.773	0.501	0.751766	eukaryotic translation initiation factor 5A
Tb927.8.5440	0.776	0.657	0.751683	flagellar calcium-binding 24 kDa protein
Tb927.11.16760	0.79	1.659	0.751359	T-complex protein 1, alpha subunit, putative
Tb927.7.4060	0.769	0.348	0.751303	cysteine peptidase, Clan CA, family C2, putative
Tb927.8.1490	0.768	0.312	0.751243	Protein of unknown function (DUF1674), putative
Tb927.6.4340	0.769	0.354	0.751151	U6 snRNA-associated Sm-like protein LSm5p
Tb927.6.4500	0.774	0.612	0.750531	conserved repeat domain containing protein, putative
Tb927.10.6800	0.782	1.107	0.750436	developmentally regulated GTP-binding protein, putative
Tb927.5.4440	0.766	0.273	0.750325	dynein light chain, putative
Tb927.10.12240	0.78	0.984	0.750241	3-ketoacyl-CoA reductase, putative
Tb927.11.1620	0.773	0.579	0.750172	hypothetical protein, conserved
Tb927.11.1020	0.78	1.002	0.74997	ribokinase, putative
Tb927.6.3800	0.792	1.974	0.74985	heat shock 70 kDa protein, mitochondrial precursor, putative
Tb927.4.3430	0.767	0.33	0.749766	hypothetical protein, conserved
Tb927.6.560	0.78	1.023	0.749657	cysteine peptidase C (CPC)
Tb927.8.1890	0.776	0.777	0.749556	cytochrome c1, heme protein, mitochondrial, putative
Tb927.9.7080	0.768	0.381	0.749482	hypothetical protein, conserved
Tb927.8.1790	0.77	0.471	0.749411	hypothetical protein, conserved
Tb927.5.3090	0.766	0.306	0.749405	Mitochondrial ATP synthase subunit, putative
Tb927.5.3090	0.766	0.306	0.749405	Mitochondrial ATP synthase subunit, putative
Tb927.3.5010	0.772	0.582	0.749113	hypothetical protein, conserved
Tb927.1.4100	0.78	1.062	0.749084	cytochrome oxidase subunit IV
Tb927.8.6430	0.766	0.318	0.749083	hypothetical protein, conserved
Tb927.6.2200	0.772	0.594	0.748879	DJ-1 family protein, putative
Tb927.6.3740	0.791	1.974	0.74885	heat shock 70 kDa protein, mitochondrial precursor, putative
Tb927.6.3750	0.791	1.974	0.74885	heat shock 70 kDa protein, mitochondrial precursor, putative
Tb927.8.2100	0.77	0.498	0.748829	vacuolar ATP synthase 16 kDa proteolipid subunit, putative
Tb927.11.8970	0.769	0.468	0.748477	ribose 5-phosphate isomerase, putative
Tb927.11.9700	0.765	0.306	0.748405	transcription factor BTF3, putative
Tb927.10.7930	0.787	1.656	0.748394	2,3-bisphosphoglycerate-independent phosphoglycerate mutase
Tb927.10.5370	0.77	0.519	0.748388	40S ribosomal protein S10, putative
Tb927.10.5360	0.77	0.519	0.748388	40S ribosomal protein S10, putative
Tb927.10.7420	0.773	0.675	0.748352	bromodomain factor 2 protein, putative
Tb927.10.12930	0.772	0.624	0.748302	hypothetical protein, conserved
Tb927.10.7180	0.804	3.447	0.748302	cysteine-rich, acidic integral membrane protein precursor
Tb927.11.680	0.769	0.48	0.748215	ribosomal protein L21E (60S), putative
Tb927.2.2510	0.775	0.813	0.74795	Mitochondrial outer membrane protein porin 1
Tb927.2.2520	0.775	0.813	0.74795	Mitochondrial outer membrane protein porin 2
Tb927.10.7960	0.768	0.468	0.747477	hypothetical protein, conserved
Tb927.11.7270	0.771	0.618	0.747416	proteasome beta 3 subunit, putative
Tb927.4.3350	0.781	1.254	0.747405	Carnosine N-methyltransferase, putative
Tb927.6.510	0.765	0.345	0.747379	GPEET procyclin
Tb927.9.8740	0.777	0.984	0.747241	Double RNA binding domain protein 3
Tb927.6.4870	0.78	1.194	0.747219	S-adenosylmethionine synthetase, putative
Tb927.8.3240	0.774	0.813	0.74695	lathosterol oxidase, putative
Tb927.11.10420	0.767	0.456	0.746742	DNA-directed RNA polymerase I subunit, putative
Tb927.8.5465	0.771	0.657	0.746683	flagellar calcium-binding 24 kDa protein
Tb927.8.4280	0.765	0.375	0.746629	nuclear transport factor 2, putative
Tb927.7.1130	0.768	0.51	0.746576	trypanothione/tryparedoxin dependent peroxidase 2
Tb927.6.3840	0.769	0.561	0.74653	reticulon domain protein
Tb927.9.6250	0.778	1.113	0.74635	arginine kinase
Tb927.6.4880	0.779	1.194	0.746219	S-adenosylmethionine synthetase, putative
Tb927.11.6230	0.782	1.446	0.745925	protein transport protein SEC61 subunit alpha, putative
Tb927.11.18680	0.761	0.273	0.745325	dynein light chain LC8, putative
Tb927.10.12010	0.765	0.432	0.745282	hypothetical protein, conserved
Tb927.11.3660	0.763	0.351	0.745226	dynein light chain Tctex-type, putative
Tb927.6.4840	0.778	1.194	0.745219	S-adenosylmethionine synthetase, putative
Tb927.6.4900	0.778	1.194	0.745219	S-adenosylmethionine synthetase, putative
Tb927.6.4910	0.778	1.194	0.745219	S-adenosylmethionine synthetase, putative
Tb927.6.4920	0.778	1.194	0.745219	S-adenosylmethionine synthetase, putative
Tb927.7.7380	0.76	0.246	0.74512	u6 snrna-associated sm-like protein lsm3
Tb927.11.2200	0.764	0.399	0.74505	DNA-directed RNA polymerase II, putative
Tb927.6.4020	0.762	0.321	0.745003	hypothetical protein, conserved
Tb927.11.5390	0.76	0.252	0.74494	mitochondrial import inner membrane translocase subunit, putative
Tb927.10.3990	0.778	1.221	0.74485	DHH1
Tb927.10.14790	0.777	1.149	0.744843	metallo-peptidase, Clan MG, Family M24
Tb927.2.1720	0.763	0.369	0.744776	hypothetical protein, conserved
Tb927.10.4640	0.781	1.467	0.744664	eukaryotic translation initiation factor 3 subunit l
Tb927.5.1710	0.767	0.567	0.74441	ATP synthase F(0) complex subunit B, mitochondrial, putative
Tb927.7.2980	0.767	0.573	0.744291	Nitroreductase family, putative
Tb927.6.4850	0.777	1.194	0.744219	S-adenosylmethionine synthetase, putative
Tb927.6.4860	0.777	1.194	0.744219	S-adenosylmethionine synthetase, putative
Tb927.6.4890	0.777	1.194	0.744219	S-adenosylmethionine synthetase, putative
Tb927.11.16950	0.762	0.357	0.744075	hypothetical protein, conserved
Tb927.11.8420	0.763	0.399	0.74405	DnaJ domain containing protein, putative
Tb927.10.1290	0.759	0.252	0.74394	hypothetical protein, conserved
Tb927.8.5460	0.777	1.224	0.74381	Flagellar calcium-binding 44 kDa protein
Tb927.11.13230	0.768	0.651	0.743795	MSP (Major sperm protein) domain containing protein, putative
Tb927.6.2280	0.763	0.42	0.743558	prefoldin subunit, putative
Tb927.6.2340	0.763	0.42	0.743558	prefoldin subunit, putative
Tb927.11.550	0.771	0.843	0.743455	hypothetical protein SCD6.10
Tb927.7.4820	0.762	0.384	0.74341	Trm112p-like protein, putative
Tb927.11.10050	0.76	0.309	0.743324	LSU ribosomal protein, mitochondrial, putative
Tb927.10.10250	0.762	0.39	0.743265	EP2 procyclin
Tb927.5.2260	0.761	0.351	0.743226	conserved protein
Tb927.5.2200	0.761	0.351	0.743226	META domain containing protein, putative
Tb927.5.2230	0.761	0.351	0.743226	conserved protein
Tb927.10.9430	0.775	1.134	0.743053	phosphoribosylpyrophosphate synthetase, putative
Tb927.1.1170	0.758	0.249	0.74303	DNA-directed RNA polymerase 2, RPB12 subunit
Tb927.10.9400	0.77	0.816	0.7429	branch point binding protein, putative
Tb927.8.1570	0.77	0.819	0.74285	Uncharacterised protein family (UPF0172), putative
Tb927.10.14070	0.775	1.149	0.742843	mevalonate diphosphate decarboxylase
Tb927.11.11910	0.765	0.546	0.742832	hypothetical protein, conserved
Tb927.7.1840	0.771	0.882	0.742826	zinc finger protein, putative
Tb927.7.1880	0.771	0.882	0.742826	zinc finger protein, putative
Tb927.11.5840	0.76	0.33	0.742766	Protein translation factor SUI1 homolog, putative
Tb927.11.13290	0.763	0.459	0.742675	mitochondrial import inner membrane translocase subunit tim17
Tb927.8.6660	0.783	1.824	0.742483	paraflagellar rod component, putative
Tb927.10.13770	0.76	0.342	0.742456	hypothetical protein, conserved
Tb927.7.3020	0.765	0.573	0.742291	Nitroreductase family, putative
Tb927.4.4730	0.778	1.422	0.742226	amino acid transporter, putative
Tb927.7.3320	0.761	0.405	0.741908	ATG12/APG12, putative
Tb927.10.13560	0.774	1.149	0.741843	mevalonate-diphosphate decarboxylase
Tb927.4.4380	0.789	2.481	0.741746	Pyrophosphate-energized vacuolar membrane proton pump 1
Tb927.10.15120	0.762	0.456	0.741742	40S ribosomal protein S13, putative
Tb927.6.480	0.76	0.372	0.741702	surface protein EP3-2 procyclin precursor
Tb927.11.8140	0.766	0.66	0.741628	ER lumen retaining receptor protein, putative
Tb927.7.4790	0.768	0.777	0.741556	proteasome beta 6 subunit
Tb927.6.450	0.76	0.384	0.74141	procyclin PARP A
Tb927.4.2540	0.756	0.237	0.741395	ubiquitin, putative
Tb927.4.1080	0.782	1.833	0.741384	V-type ATPase, A subunit, putative
Tb927.4.4910	0.777	1.413	0.741339	3,2-trans-enoyl-CoA isomerase, mitochondrial precursor, putative
Tb927.7.7420	0.781	1.755	0.741257	ATP synthase F1, alpha subunit
Tb927.7.7430	0.781	1.755	0.741257	ATP synthase F1, alpha subunit
Tb927.4.1100	0.762	0.48	0.741215	ribosomal protein L21E (60S), putative
Tb927.10.10610	0.766	0.69	0.74108	protein tyrosine phosphatase, putative
Tb927.11.3540	0.771	0.996	0.74106	hypothetical protein, conserved
Tb927.9.5320	0.775	1.284	0.741006	nucleolar RNA binding protein, putative
Tb927.10.370	0.763	0.54	0.740955	calcineurin B subunit, putative
Tb927.10.12560	0.759	0.363	0.740925	hypothetical protein
Tb927.11.2650	0.786	2.262	0.74088	heat shock protein 84, putative
Tb927.8.6000	0.775	1.296	0.740847	fatty acid desaturase, putative
Tb927.8.1750	0.759	0.375	0.740629	Fe-S cluster assembly protein DRE2
Tb927.8.5880	0.762	0.519	0.740388	eukaryotic translation initiation factor 1A, putative
Tb927.11.3380	0.761	0.474	0.740346	Ran-binding protein 1, putative
Tb927.10.13360	0.776	1.413	0.740339	Elongation factor Tu, mitochondrial
Tb927.9.5730	0.774	1.269	0.740205	nucleosome assembly protein-like protein
Tb927.3.4360	0.759	0.393	0.740193	40S ribosomal protein S15A, putative
Tb927.10.14810	0.761	0.483	0.740151	multiprotein-bridging factor 1, putative
Tb927.3.3000	0.779	1.701	0.739873	Putative intraflagellar transport protein C3
Tb927.9.11840	0.764	0.654	0.739739	pre-rRNA-processing protein PNO1, putative
Tb927.3.3880	0.759	0.414	0.739697	hypothetical protein, conserved
Tb927.3.4680	0.774	1.338	0.739298	RAB GDP dissociation inhibitor alpha, putative
Tb927.8.5780	0.761	0.531	0.739139	phosphatase of regenerating liver-type phosphatase, putative
Tb927.10.6880	0.769	0.996	0.73906	glyceraldehyde 3-phosphate dehydrogenase, cytosolic
Tb927.7.1300	0.771	1.134	0.739053	protein disulfide isomerase, putative
Tb927.4.2840	0.765	0.75	0.739019	hypothetical protein, conserved
Tb927.11.3030	0.77	1.071	0.738953	phosphoribosylpyrophosphate synthetase, putative
Tb927.8.5470	0.764	0.702	0.738864	flagellar calcium-binding 24 kDa protein
Tb927.11.9420	0.763	0.651	0.738795	ATP synthase, putative
Tb927.10.1230	0.769	1.029	0.738568	Enriched in surface-labeled proteome protein 23
Tb927.9.1720	0.763	0.672	0.738407	peroxisomal membrane protein 4, putative
Tb927.7.4910	0.77	1.11	0.738393	hypothetical protein, conserved
Tb927.11.10940	0.766	0.852	0.738309	hypothetical protein, conserved
Tb927.6.2600	0.758	0.432	0.738282	Protein of unknown function (DUF1077), putative
Tb927.6.520	0.757	0.39	0.738265	EP3-2 procyclin
Tb927.11.10240	0.762	0.63	0.738188	ATP-dependent protease subunit HslV
Tb927.4.1930	0.765	0.819	0.73785	eukaryotic translation initiation factor 3 subunit g
Tb927.11.7380	0.778	1.812	0.737617	glycerol-3-phosphate dehydrogenase (FAD-dependent), mitochondrial
Tb927.7.2500	0.772	1.314	0.737611	proteasome regulatory ATPase subunit 1
Tb927.11.1270	0.759	0.51	0.737576	Mitochondrial ATP synthase subunit, putative
Tb927.10.6670	0.756	0.378	0.737555	dynein light chain, putative
Tb927.11.8090	0.766	0.912	0.73735	protein phosphatase 1, putative
Tb927.11.15930	0.758	0.474	0.737346	Sybindin-like family, putative
Tb927.8.2970	0.766	0.915	0.737303	hypothetical protein, conserved
Tb927.2.3610	0.757	0.435	0.737214	Mitochondrial ATP synthase subunit, putative
Tb927.8.6240	0.764	0.801	0.73715	STOP axonemal protein
Tb927.11.6470	0.757	0.438	0.737146	hypothetical protein, conserved
Tb927.8.2210	0.764	0.807	0.73705	pteridine reductase 1
Tb927.6.3950	0.758	0.492	0.736957	hypothetical protein, conserved
Tb927.11.13010	0.76	0.591	0.736937	hypothetical protein
Tb927.8.6060	0.77	1.215	0.736932	glycine acetyltransferase, putative
Tb927.5.1130	0.766	0.939	0.736929	hypothetical protein, conserved
Tb927.7.320	0.759	0.543	0.736893	RNA-binding protein 8
Tb927.8.1510	0.776	1.71	0.73677	ATP-dependent RNA helicase DBP2B, putative
Tb927.7.2600	0.756	0.411	0.736767	class I transcription factor A, subunit 7
Tb927.8.7980	0.784	2.481	0.736746	Pyrophosphate-energized vacuolar membrane proton pump 2, putative
Tb927.8.5860	0.765	0.906	0.736445	mitochondrial ribosomal protein L17
Tb927.11.13960	0.755	0.384	0.73641	U6 snRNA-associated Sm-like protein LSm4p
Tb927.6.3490	0.753	0.309	0.736324	zinc finger protein 1
Tb927.8.690	0.754	0.348	0.736303	peptidyl-prolyl cis-trans isomerase/rotamase, putative
Tb927.10.4130	0.763	0.798	0.736201	NADH-ubiquinone oxidoreductase B13 subunit
Tb927.3.3770	0.764	0.861	0.736163	paraflagellar rod component, putative
Tb927.3.3790	0.764	0.861	0.736163	hypothetical protein, conserved
Tb927.11.1840	0.769	1.2	0.736137	hypothetical protein, conserved
Tb927.10.16100	0.77	1.278	0.736085	FK506-binding protein (FKBP)-type peptidyl-prolyl isomerase, putative
Tb927.4.2250	0.766	1.002	0.73597	hypothetical protein, conserved
Tb927.9.15980	0.772	1.449	0.735888	nucleoside transporter 1, putative
Tb927.3.4050	0.757	0.498	0.735829	hypothetical protein, conserved
Tb927.4.1360	0.764	0.882	0.735826	Glucose-6-phosphate 1-epimerase, putative
Tb927.10.540	0.77	1.311	0.73565	ATP-dependent RNA helicase SUB2, putative
Tb927.9.7770	0.764	0.897	0.735587	spermidine synthase
Tb927.11.17830	0.754	0.378	0.735555	hypothetical protein, conserved
Tb927.11.9770	0.758	0.561	0.73553	hypothetical protein, conserved
Tb927.11.3080	0.759	0.615	0.735473	vesicular protein trafficking mediator, putative
Tb927.11.14320	0.758	0.564	0.73547	hypothetical protein, conserved
Tb927.8.7740	0.771	1.404	0.735453	amino acid transporter, putative
Tb927.10.15870	0.761	0.726	0.735438	RNA binding protein, putative
Tb927.3.3620	0.756	0.471	0.735411	hypothetical protein, conserved
Tb927.8.6770	0.769	1.26	0.735325	WD domain, G-beta repeat, putative
Tb927.4.1010	0.751	0.276	0.735239	hypothetical protein
Tb927.11.12100	0.754	0.393	0.735193	RNA-binding protein, putative
Tb927.7.1140	0.757	0.531	0.735139	trypanothione/tryparedoxin dependent peroxidase 3
Tb927.6.1020	0.77	1.353	0.735104	cysteine peptidase, Clan CA, family C1, Cathepsin L-like
Tb927.6.980	0.77	1.353	0.735104	cysteine peptidase, Clan CA, family C1, Cathepsin L-like
Tb927.7.7040	0.764	0.93	0.735069	methylthioadenosine phosphorylase, putative
Tb927.8.5640	0.765	1.002	0.73497	putative succinate dehydrogenase subunit
Tb927.3.3100	0.753	0.369	0.734776	peptidyl-prolyl cis-trans isomerase NIMA-interacting 4, putative
Tb927.10.5810	0.769	1.302	0.734768	The ARF-like 2 binding protein BART, putative
Tb927.10.10320	0.752	0.33	0.734766	dynein light chain Tctex-type, putative
Tb927.7.840	0.753	0.375	0.734629	Mitochondrial ATP synthase subunit, putative
Tb927.11.11620	0.76	0.717	0.734597	hypothetical protein, conserved
Tb927.8.3040	0.758	0.609	0.734588	hypothetical protein, conserved
Tb927.1.2150	0.754	0.423	0.734488	Small kinetoplastid calpain-related protein 1-4
Tb927.9.3410	0.753	0.381	0.734482	hypothetical protein, conserved
Tb927.10.8230	0.771	1.494	0.734331	protein disulfide isomerase 2
Tb927.11.14880	0.766	1.116	0.734308	Paraflagellar Rod Proteome Component 9, putative
Tb927.5.1460	0.764	0.981	0.734286	Possible lysine decarboxylase, putative
Tb927.5.2160	0.752	0.351	0.734226	conserved protein
Tb927.6.1050	0.769	1.35	0.734143	cysteine peptidase, Clan CA, family C1, Cathepsin L-like
Tb927.6.990	0.769	1.35	0.734143	cysteine peptidase, Clan CA, family C1, Cathepsin L-like
Tb927.6.960	0.769	1.353	0.734104	cysteine peptidase, Clan CA, family C1, Cathepsin L-like
Tb927.6.1010	0.769	1.353	0.734104	cysteine peptidase, Clan CA, family C1, Cathepsin L-like
Tb927.10.270	0.753	0.399	0.73405	60S ribosomal protein L32, putative
Tb927.11.13500	0.774	1.779	0.733986	par1
Tb927.11.2130	0.764	1.005	0.733925	proteasome regulatory non-ATP-ase subunit 3
Tb927.8.2740	0.764	1.017	0.733746	mitochondrial RNA binding protein
Tb927.11.9500	0.753	0.414	0.733697	hypothetical protein, conserved
Tb927.11.9490	0.764	1.032	0.733524	CobW/HypB/UreG, nucleotide-binding domain containing protein, putative
Tb927.9.8520	0.761	0.843	0.733455	hypothetical protein, conserved
Tb927.4.1810	0.751	0.345	0.733379	mitochondrial ribosomal protein L33
Tb927.11.13870	0.756	0.57	0.73335	uncharacterized protein, PH0010 family/AmmeMemoRadiSam system protein A, putative
Tb927.11.15020	0.757	0.627	0.733245	iron superoxide dismutase
Tb927.10.14820	0.762	0.924	0.733163	Mitochondrial ADP/ATP carrier protein 5c
Tb927.10.14830	0.762	0.924	0.733163	Mitochondrial ADP/ATP carrier protein 5b
Tb927.10.14840	0.762	0.924	0.733163	Mitochondrial ADP/ATP carrier protein 5a
Tb927.6.1000	0.768	1.35	0.733143	cysteine peptidase, Clan CA, family C1, Cathepsin L-like
Tb927.6.1060	0.768	1.35	0.733143	cysteine peptidase, Clan CA, family C1, Cathepsin L-like
Tb927.6.1030	0.768	1.35	0.733143	cysteine peptidase, Clan CA, family C1, Cathepsin L-like
Tb927.6.1040	0.768	1.35	0.733143	cysteine peptidase, Clan CA, family C1, Cathepsin L-like
Tb927.6.970	0.768	1.353	0.733104	cysteine peptidase, Clan CA, family C1, Cathepsin L-like
Tb927.9.8880	0.765	1.131	0.733095	actin B
Tb927.11.13330	0.755	0.54	0.732955	hypothetical protein, conserved
Tb927.10.11060	0.756	0.591	0.732937	hypothetical protein, conserved
Tb927.9.6210	0.766	1.215	0.732932	arginine kinase
Tb927.9.6210	0.766	1.215	0.732932	arginine kinase
Tb927.11.14250	0.771	1.617	0.732852	T-complex protein 1, epsilon subunit, putative
Tb927.2.5910	0.753	0.456	0.732742	40S ribosomal protein S13, putative
Tb927.5.3350	0.758	0.717	0.732597	iron superoxide dismutase A, mitochondrial
Tb927.9.11540	0.767	1.317	0.732572	hypothetical protein, conserved
Tb927.3.2230	0.761	0.906	0.732445	succinyl-CoA synthetase alpha subunit, putative
Tb927.11.11690	0.769	1.488	0.732405	Vacuolar proton pump subunit B, putative
Tb927.3.4830	0.757	0.675	0.732352	hypothetical protein
Tb927.4.4320	0.75	0.351	0.732226	divalent cation tolerance protein, putative
Tb927.9.760	0.75	0.351	0.732226	hypothetical protein
Tb927.10.3660	0.765	1.212	0.731973	aspartate aminotransferase
Tb927.10.14890	0.779	2.463	0.731918	C-terminal motor kinesin, putative
Tb927.8.4640	0.764	1.158	0.731717	Component of motile flagella 19
Tb927.11.9930	0.758	0.771	0.731658	NADH dehydrogenase (ubiquinone) 1 beta subcomplex subunit, putative
Tb927.5.4450	0.753	0.51	0.731576	hypothetical protein, conserved
Tb927.11.9610	0.762	1.029	0.731568	eukaryotic translation initiation factor 3 subunit i
Tb927.11.14950	0.751	0.42	0.731558	zinc finger protein 2
Tb927.8.5040	0.759	0.837	0.731554	EMG1/NEP1 methyltransferase, putative
Tb927.1.700	0.766	1.323	0.731493	phosphoglycerate kinase
Tb927.7.1010	0.753	0.516	0.73145	hypothetical protein, conserved
Tb927.11.4910	0.764	1.179	0.731425	predicted ankyrin repeat family protein
Tb927.10.10260	0.751	0.426	0.731419	EP1 procyclin
Tb927.8.7450	0.761	0.984	0.731241	myosin heavy chain kinase A, putative
Tb927.4.3070	0.766	1.347	0.731182	hypothetical protein, conserved
Tb927.3.3140	0.75	0.396	0.731121	hypothetical protein, conserved
Tb927.7.4770	0.754	0.597	0.73082	cyclophilin-type peptidyl-prolyl cis-trans isomerase, putative
Tb927.7.1780	0.756	0.708	0.730757	Adenine phosphoribosyltransferase, putative
Tb927.11.14430	0.758	0.825	0.730751	proteasome regulatory non-ATP-ase subunit
Tb927.9.12870	0.75	0.423	0.730488	trafficking protein particle complex subunit 1, putative
Tb927.7.7360	0.761	1.038	0.730435	cdc2-related kinase 2
Tb927.1.4140	0.762	1.11	0.730393	Bardet-Biedl syndrome 5 protein
Tb927.4.4620	0.751	0.474	0.730346	cytochrome oxidase subunit VIII
Tb927.8.3070	0.75	0.438	0.730146	hypothetical protein, conserved
Tb927.9.8850	0.762	1.131	0.730095	actin A
Tb927.4.3540	0.762	1.14	0.729969	hypothetical protein, conserved
Tb927.7.2690	0.748	0.363	0.729925	hypothetical protein, conserved
Tb927.3.3470	0.752	0.543	0.729893	cytochrome b5, putative
Tb927.4.5210	0.745	0.255	0.729851	hypothetical protein, conserved
Tb927.8.3090	0.749	0.408	0.729838	hypothetical protein, conserved
Tb927.11.13780	0.75	0.453	0.729808	profilin
Tb927.10.13370	0.753	0.6	0.729762	dynein light chain Tctex-type, putative
Tb927.4.1370	0.75	0.456	0.729742	hypothetical protein, conserved
Tb927.6.1600	0.747	0.336	0.72961	hypothetical protein, conserved
Tb927.8.7510	0.762	1.17	0.72955	p-nitrophenylphosphatase, putative
Tb927.11.4530	0.755	0.72	0.729544	N-acetyltransferase subunit ARD1
Tb927.4.4350	0.753	0.612	0.729531	emp24/gp25L/p24 family/GOLD, putative
Tb927.10.10390	0.766	1.479	0.729516	trypanothione reductase
Tb927.9.8990	0.76	1.038	0.729435	Ankyrin repeats (3 copies), putative
Tb927.10.11530	0.746	0.306	0.729405	hypothetical protein, conserved
Tb927.4.4190	0.75	0.474	0.729346	C2 domain containing protein, putative
Tb927.3.3580	0.775	2.322	0.729286	heat shock protein 90, putative
Tb927.11.7350	0.749	0.432	0.729282	Histone H2B variant V
Tb927.11.15480	0.753	0.627	0.729245	heat shock protein Hsp20, putative
Tb927.11.6330	0.756	0.801	0.72915	6-phosphogluconolactonase
Tb927.10.8050	0.756	0.801	0.72915	TFIIF-stimulated CTD phosphatase, putative
Tb927.11.7020	0.755	0.744	0.729123	proteasome alpha 7 subunit, putative
Tb927.11.2300	0.764	1.359	0.729027	eukaryotic peptide chain release factor subunit 1, putative
Tb927.10.1060	0.767	1.611	0.728922	T-complex protein 1, delta subunit, putative
Tb927.11.8890	0.748	0.405	0.728908	DNA-dependent RNA polymerases, putative
Tb927.8.3750	0.765	1.452	0.72885	nucleolar protein 56, putative
Tb927.11.15910	0.752	0.597	0.72882	iron superoxide dismutase
Tb927.11.12950	0.753	0.651	0.728795	ras-like small GTPase, putative
Tb927.5.1810	0.771	1.98	0.728786	lysosomal/endosomal membrane protein p67
Tb927.10.10670	0.752	0.6	0.728762	kinetoplastid-specific dual specificity phosphatase, putative
Tb927.8.3820	0.759	1.02	0.728701	conserved protein, unknown function
Tb927.3.2150	0.76	1.089	0.728693	protein phosphatase 2C, putative
Tb927.8.4690	0.747	0.375	0.728629	hypothetical protein, conserved
Tb927.5.1360	0.749	0.462	0.728609	nucleoside 2-deoxyribosyltransferase
Tb927.4.4920	0.755	0.777	0.728556	hypothetical protein, conserved
Tb927.10.16080	0.747	0.378	0.728555	hypothetical protein, conserved
Tb927.10.11300	0.747	0.381	0.728482	paraflagellar rod component, putative
Tb927.9.12480	0.749	0.468	0.728477	dynein light chain type 1, putative
Tb927.11.18690	0.752	0.615	0.728473	expression site-associated gene 4 (ESAG4) protein, putative
Tb927.8.6170	0.771	2.01	0.728468	transketolase, putative
Tb927.9.9060	0.751	0.573	0.728291	Lsm12 protein, putative
Tb927.5.3820	0.758	0.984	0.728241	aspartate carbamoyltransferase, putative
Tb927.10.1430	0.754	0.738	0.728228	hypothetical protein, conserved
Tb927.7.4500	0.766	1.587	0.728207	PX domain containing protein, putative
Tb927.8.1550	0.774	2.337	0.728138	paraflagellar rod component, putative
Tb927.10.13710	0.758	0.996	0.72806	Activator of Hsp90 ATPase, N-terminal/Activator of Hsp90 ATPase homolog 1-like protein, putative
Tb927.9.8950	0.762	1.284	0.728006	metallo- peptidase, Clan M- Family M48
Tb927.11.6250	0.755	0.81	0.728	Mitochondrial ATP synthase subunit, putative
Tb927.10.14150	0.764	1.44	0.728	nuclear segregation protein, putative
Tb927.11.12210	0.756	0.876	0.727922	Domain of unknown function (DUF4586), putative
Tb927.10.11080	0.784	3.495	0.727915	paraflagellar rod protein
Tb927.11.6870	0.754	0.759	0.727864	14-3-3 protein 2
Tb927.10.2190	0.756	0.885	0.727778	Protein of unknown function (DUF667), putative
Tb927.8.7230	0.755	0.825	0.727751	hypothetical protein, conserved
Tb927.8.6990	0.744	0.294	0.727733	hypothetical protein, conserved
Tb927.10.7390	0.745	0.333	0.727688	PHF5-like protein, putative
Tb927.7.5060	0.765	1.548	0.727674	CLN3 protein, putative
Tb927.9.3780	0.743	0.261	0.727674	Mitochondrial pyruvate carrier 1
Tb927.10.15530	0.768	1.809	0.72765	ABC transport system ATP-binding protein, putative
Tb927.11.3650	0.768	1.809	0.72765	adenylosuccinate synthetase, putative
Tb927.9.10560	0.749	0.507	0.727639	Archaic Translocase of outer membrane 19 kDa subunit
Tb927.11.7060	0.761	1.245	0.727526	acidocalcisomal pyrophosphatase
Tb927.11.2410	0.752	0.669	0.727462	hypothetical protein, conserved
Tb927.10.280	0.748	0.477	0.72728	cytochrome oxidase subunit VI
Tb927.10.10010	0.752	0.681	0.727243	mRNA turnover protein 4 homolog, putative
Tb927.4.4970	0.757	0.984	0.727241	myosin heavy chain kinase A, putative
Tb927.7.1170	0.748	0.48	0.727215	RNA-binding protein Y14
Tb927.10.12280	0.746	0.396	0.727121	hypothetical protein
Tb927.3.3570	0.748	0.489	0.727021	hypothetical protein, conserved
Tb927.11.7280	0.746	0.402	0.726979	DNA-direcetd RNA polymerase II, subunit 9, putative
Tb927.7.3520	0.746	0.405	0.726908	Mitochondrial pyruvate carrier 2
Tb927.8.5080	0.767	1.788	0.726885	amidase, putative
Tb927.6.4430	0.757	1.008	0.72688	homoserine kinase
Tb927.6.570	0.745	0.366	0.726851	conserved protein
Tb927.5.2780	0.76	1.224	0.72681	mitochondrial DNA polymerase beta
Tb927.10.10690	0.759	1.152	0.726801	CEP19-like protein, putative
Tb927.8.6010	0.748	0.501	0.726766	hypothetical predicted multi-pass transmembrane protein
Tb927.8.4430	0.757	1.026	0.726613	uridine phosphorylase
Tb927.10.4450	0.753	0.774	0.726607	stress-inducible protein STI1-like, putative
Tb927.10.3270	0.747	0.465	0.726543	hypothetical protein, conserved
Tb927.9.11600	0.752	0.726	0.726438	glycosomal membrane protein
Tb927.10.1750	0.752	0.729	0.726386	hypothetical protein, conserved
Tb927.8.2520	0.769	2.022	0.726341	acetyl-CoA synthetase, putative
Tb927.4.3360	0.761	1.335	0.726337	hypothetical protein, conserved
Tb927.3.1790	0.757	1.047	0.726303	pyruvate dehydrogenase E1 beta subunit, putative
Tb927.7.1350	0.757	1.053	0.726215	Pentatricopeptide repeat protein (PPR), putative
Tb927.4.3610	0.75	0.63	0.726188	protein phosphatase 1, putative
Tb927.6.4810	0.744	0.354	0.726151	zinc-binding protein (Yippee), putative
Tb927.10.12260	0.762	1.428	0.72615	cytosolic nonspecific dipeptidase, putative
Tb927.11.2390	0.747	0.486	0.726086	Tubulin-tyrosine ligase family, putative
Tb927.6.1880	0.765	1.683	0.726081	aspartyl-tRNA synthetase, putative
Tb927.4.4700	0.753	0.81	0.726	hypothetical protein, conserved
Tb927.3.4500	0.765	1.698	0.725908	Fumarate hydratase class I, cytosolic
Tb927.7.570	0.749	0.594	0.725879	prefoldin, putative
Tb927.2.2440	0.763	1.542	0.725747	proteasome regulatory non-ATPase subunit 6
Tb927.3.4170	0.745	0.414	0.725697	CRK9-associated protein
Tb927.11.4700	0.753	0.831	0.725652	prostaglandin f synthase
Tb927.6.1440	0.752	0.777	0.725556	LSU ribosomal protein, mitochondrial, putative
Tb927.7.1670	0.748	0.561	0.72553	Eukaryotic translation initiation factor 4E type 6
Tb927.8.6580	0.766	1.83	0.725417	Succinate dehydrogenase [ubiquinone] flavoprotein subunit, mitochondrial
Tb927.8.5330	0.75	0.672	0.725407	tyrosyl/methionyl-tRNA synthetase, putative
Tb927.2.1290	0.74	0.237	0.725395	hypothetical protein
Tb927.10.1580	0.743	0.345	0.725379	Domain of unknown function (DUF543), putative
Tb927.11.15440	0.749	0.621	0.725359	NADH dehydrogenase (ubiquinone) 1 beta subcomplex subunit, putative
Tb927.10.4880	0.75	0.675	0.725352	hypothetical protein, conserved
Tb927.8.3140	0.754	0.921	0.725209	SIR2-like protein 4, putative
Tb927.10.11370	0.745	0.441	0.725078	hypothetical protein, conserved
Tb927.10.3210	0.764	1.686	0.725046	delta-1-pyrroline-5-carboxylate dehydrogenase, putative
Tb927.11.10140	0.752	0.81	0.725	hypothetical protein, conserved
Tb927.9.15460	0.778	3.126	0.724959	calcium motive p-type ATPase, putative
Tb927.3.1250	0.74	0.255	0.724851	DNA-directed RNA polymerase I subunit RPB10
Tb927.11.12590	0.751	0.762	0.724812	Der1-like family, putative
Tb927.5.730	0.75	0.705	0.724811	hypothetical protein
Tb927.10.16120	0.762	1.539	0.724783	inosine-5'-monophosphate dehydrogenase
Tb927.7.1080	0.756	1.083	0.72478	hypothetical protein, conserved
Tb927.8.5380	0.741	0.294	0.724733	ubiquitin fold modifier protein, putative
Tb927.10.11900	0.746	0.504	0.724702	thioredoxin, putative
Tb927.7.1550	0.761	1.464	0.724701	KRET2
Tb927.2.4530	0.75	0.714	0.72465	hypothetical protein, conserved
Tb927.11.1330	0.742	0.336	0.72461	Stress responsive A/B Barrel Domain, putative
Tb927.11.11130	0.746	0.51	0.724576	hypothetical protein, conserved
Tb927.11.15280	0.756	1.098	0.724564	tRNA-sepcific adenosine deaminase
Tb927.11.10070	0.749	0.666	0.724517	Bromodomain, putative
Tb927.11.6590	0.762	1.566	0.724458	metallo-peptidase, Clan MF, Family M17
Tb927.3.3330	0.744	0.426	0.724419	heat shock protein 20, putative
Tb927.8.2530	0.742	0.345	0.724379	Cytochrome c oxidase copper chaperone, related
Tb927.9.6130	0.745	0.474	0.724346	calmodulin, putative
Tb927.10.12840	0.753	0.915	0.724303	mitochondrial carrier protein
Tb927.11.950	0.76	1.416	0.724301	RNA-binding protein, putative
Tb927.11.14750	0.756	1.119	0.724265	PSP1 C-terminal conserved region, putative
Tb927.8.3100	0.761	1.5	0.724258	coronin, putative
Tb927.1.3170	0.753	0.918	0.724256	CHORD, putative
Tb927.8.6230	0.754	0.99	0.72415	hypothetical protein, conserved
Tb927.8.7280	0.75	0.744	0.724123	emp24/gp25L/p24 family/GOLD, putative
Tb927.10.7570	0.759	1.356	0.724066	dihydrolipoamide acetyltransferase E2 subunit, putative
Tb927.10.6080	0.753	0.933	0.724022	proteasome subunit beta type-5, putative
Tb927.10.12700	0.756	1.137	0.724011	pyruvate dehydrogenase E1 alpha subunit, putative
Tb927.11.7170	0.76	1.44	0.724	seryl-tRNA synthetase
Tb927.3.1720	0.74	0.285	0.723984	hypothetical protein, conserved
Tb927.10.11970	0.758	1.29	0.723927	glutamine aminotransferase (GlnAT)
Tb927.10.4840	0.746	0.543	0.723893	transcription factor IIa, putative
Tb927.9.8810	0.746	0.543	0.723893	hypothetical protein, conserved
Tb927.8.3050	0.763	1.704	0.723839	Chitobiase/beta-hexosaminidase C-terminal domain containing protein, putative
Tb927.8.6550	0.751	0.822	0.723801	hypothetical protein, conserved
Tb927.10.8400	0.752	0.885	0.723778	legume-like lectin, putative
Tb927.5.1700	0.75	0.768	0.723709	replication Factor A 28 kDa subunit, putative
Tb927.8.5660	0.748	0.657	0.723683	hypothetical protein, conserved
Tb927.6.4480	0.775	2.928	0.723666	valyl-tRNA synthetase, putative
Tb927.9.13490	0.76	1.47	0.723627	metallo-peptidase, Clan MG, Family M24
Tb927.3.1840	0.752	0.897	0.723587	3-oxo-5-alpha-steroid 4-dehydrogenase, putative
Tb927.11.7080	0.757	1.245	0.723526	acidocalcisomal pyrophosphatase
Tb927.10.12360	0.745	0.513	0.723513	hypothetical protein, conserved
Tb927.8.5270	0.751	0.84	0.723505	hypothetical protein, conserved
Tb927.7.6260	0.753	0.969	0.723469	TPR repeat, putative
Tb927.2.5660	0.75	0.783	0.723454	adenylate kinase, putative
Tb927.4.1440	0.747	0.618	0.723416	probable rRNA maturation factor YbeY, putative
Tb927.10.1500	0.769	2.322	0.723286	methionyl-tRNA synthetase, putative
Tb927.11.12360	0.744	0.48	0.723215	ankyrin repeat protein, putative
Tb927.11.13570	0.742	0.393	0.723193	hypothetical protein, conserved
Tb927.4.750	0.743	0.438	0.723146	50S ribosomal protein L7Ae, putative
Tb927.11.9580	0.742	0.396	0.723121	hypothetical protein, conserved
Tb927.9.15240	0.749	0.747	0.723071	ATP11 protein, putative
Tb927.10.6020	0.745	0.537	0.723016	hypothetical protein, conserved
Tb927.10.12300	0.742	0.402	0.722979	hypothetical protein, conserved
Tb927.5.1210	0.752	0.936	0.722976	short-chain dehydrogenase, putative
Tb927.7.5930	0.763	1.791	0.722852	Protein Associated with Differentiation 1
Tb927.10.2770	0.755	1.149	0.722843	eukaryotic translation initiation factor 5, putative
Tb927.11.12800	0.753	1.014	0.722791	ribonucleoside-diphosphate reductase small chain
Tb927.11.10820	0.751	0.885	0.722778	Casein kinase II subunit beta, putative
Tb927.11.7560	0.764	1.89	0.722757	Component of motile flagella 15
Tb927.6.4160	0.751	0.891	0.722682	hypothetical protein, conserved
Tb927.10.5050	0.737	0.228	0.722675	mitochondrial ATP synthase epsilon chain
Tb927.11.1980	0.76	1.554	0.722602	zinc finger protein family member, putative
Tb927.11.11590	0.756	1.242	0.722566	Eukaryotic translation initiation factor 3 subunit E
Tb927.10.8020	0.766	2.097	0.722557	prolyl endopeptidase
Tb927.9.5210	0.762	1.734	0.722496	glutaminyl-tRNA synthetase, putative
Tb927.10.15150	0.741	0.381	0.722482	DNA-directed RNA polymerase III subunit C11, putative
Tb927.10.1250	0.749	0.786	0.722403	Aminoacyl-tRNA editing domain containing protein, putative
Tb927.7.2200	0.737	0.237	0.722395	mitochondrial import inner membrane translocase subunit tim9
Tb927.6.4470	0.752	0.978	0.722332	S-adenosylmethionine decarboxylaseregulator
Tb927.11.8910	0.744	0.522	0.722325	NADH-ubiquinone oxidoreductase B16.6 subunit
Tb927.10.16060	0.74	0.348	0.722303	hypothetical protein, conserved
Tb927.11.6450	0.755	1.188	0.722301	Serine incorporator (Serinc), putative
Tb927.11.11940	0.751	0.921	0.722209	protein phosphatase 2A, putative
Tb927.10.9870	0.749	0.798	0.722201	Component of motile flagella 12
Tb927.10.6050	0.79	5.112	0.722171	clathrin heavy chain
Tb927.10.11520	0.74	0.354	0.722151	mitochondrial import inner membrane translocase subunit tim13
Tb927.7.2360	0.751	0.927	0.722116	N-acetyltransferase, putative
Tb927.7.5840	0.747	0.69	0.72208	hypothetical protein, conserved
Tb927.11.5440	0.761	1.695	0.721942	malic enzyme
Tb927.7.2660	0.755	1.218	0.721891	zinc finger protein family member, putative
Tb927.11.6390	0.75	0.879	0.721874	START domain containing protein, putative
Tb927.8.4770	0.746	0.648	0.72185	small GTP-binding protein Rab18
Tb927.11.16080	0.75	0.882	0.721826	Soluble NSF attachment protein, SNAP, putative
Tb927.9.6940	0.749	0.822	0.721801	DNA topoisomerase type IB small subunit
Tb927.5.550	0.754	1.152	0.721801	V-type proton ATPase subunit D, putative
Tb927.11.12790	0.752	1.014	0.721791	ribonucleoside-diphosphate reductase small chain
Tb927.11.12780	0.752	1.014	0.721791	ribonucleoside-diphosphate reductase small chain, putative
Tb927.8.2540	0.756	1.317	0.721572	3-ketoacyl-CoA thiolase, putative
Tb927.4.2450	0.755	1.242	0.721566	protein disulfide isomerase 1
Tb927.2.2670	0.738	0.303	0.721486	histone H4 variant
Tb927.5.1780	0.757	1.404	0.721453	hypothetical protein, conserved
Tb927.10.9810	0.75	0.906	0.721445	hypothetical protein, conserved
Tb927.11.7700	0.747	0.726	0.721438	hypothetical protein
Tb927.8.7390	0.752	1.041	0.721391	protein phosphatase 1
Tb927.11.7540	0.751	0.975	0.721377	electron-transfer-flavoprotein, alpha polypeptide, putative
Tb927.10.1020	0.742	0.474	0.721346	hypothetical protein
Tb927.8.5800	0.742	0.477	0.72128	hypothetical protein, conserved
Tb927.10.200	0.744	0.576	0.721232	vacuolar ATP synthase, putative
Tb927.8.1170	0.751	0.996	0.72106	eukaryotic translation initiation factor 3 subunit h
Tb927.8.1190	0.751	0.996	0.72106	eukaryotic translation initiation factor 3 subunit h
Tb927.11.15760	0.753	1.134	0.721053	GPI transamidase subunit Tta1
Tb927.9.9670	0.747	0.753	0.720967	proteasome alpha 1 subunit, putative
Tb927.11.11980	0.739	0.366	0.720851	cytoskeleton-associated protein 15
Tb927.10.4620	0.738	0.327	0.720845	peptidyl-prolyl cis-trans isomerase, putative
Tb927.1.2780	0.735	0.225	0.72077	hypothetical protein
Tb927.11.4360	0.747	0.774	0.720607	Protein of unknown function (DUF1014), putative
Tb927.10.650	0.745	0.663	0.720573	Component of motile flagella 17
Tb927.1.3070	0.754	1.242	0.720566	hypothetical protein, conserved
Tb927.11.8990	0.753	1.176	0.720467	cation transporter, putative
Tb927.7.4160	0.749	0.906	0.720445	fatty acid elongase, putative
Tb927.11.12860	0.749	0.909	0.720398	cAMP response protein, putative
Tb927.10.12500	0.77	2.739	0.72035	P-type H+-ATPase, putative
Tb927.4.2620	0.746	0.732	0.720333	hypothetical protein, conserved
Tb927.8.7460	0.756	1.416	0.720301	zinc transporter, putative
Tb927.7.2550	0.755	1.338	0.720298	proteasome regulatory ATPase subunit 5
Tb927.5.2120	0.751	1.056	0.720171	hypothetical protein, conserved
Tb927.11.2940	0.752	1.128	0.720138	hypothetical protein, conserved
Tb927.11.17000	0.772	3	0.720038	leucine-rich repeat protein (LRRP), putative
Tb927.11.14310	0.735	0.249	0.72003	small nuclear ribonucleoprotein Sm-G
Tb927.1.2820	0.762	1.959	0.720011	pteridine transporter, putative
Tb927.10.10110	0.74	0.447	0.719943	PIG-P, putative
Tb927.3.3560	0.761	1.875	0.719921	U-box domain containing protein, putative
Tb927.10.7760	0.743	0.594	0.719879	hypothetical protein, conserved
Tb927.9.9290	0.759	1.701	0.719873	polyadenylate-binding protein 1
Tb927.11.4920	0.747	0.819	0.71985	hypothetical protein, conserved
Tb927.3.3540	0.757	1.536	0.719819	Nucleoporin NUP53b
Tb927.11.12810	0.75	1.014	0.719791	ribonucleoside-diphosphate reductase small chain
Tb927.11.11660	0.751	1.089	0.719693	conserved protein
Tb927.9.2070	0.743	0.609	0.719588	hypothetical protein, conserved
Tb927.10.8980	0.741	0.51	0.719576	hypothetical protein, conserved
Tb927.7.7230	0.749	0.963	0.71956	nitroreductase
Tb927.11.7940	0.74	0.465	0.719543	calmodulin, putative
Tb927.10.11030	0.736	0.303	0.719486	Archaic translocase of outer membrane 11 kDa subunit
Tb927.5.560	0.756	1.482	0.719479	hypothetical protein, conserved
Tb927.4.5030	0.75	1.041	0.719391	protein phosphatase 1
Tb927.1.710	0.753	1.263	0.719285	phosphoglycerate kinase
Tb927.6.3290	0.738	0.393	0.719193	intraflagellar transport protein 20
Tb927.4.2000	0.755	1.425	0.719188	ruvB-like DNA helicase, putative
Tb927.10.14630	0.744	0.687	0.719134	fibrillarin, putative
Tb927.10.12510	0.769	2.763	0.719133	P-type H+-ATPase, putative
Tb927.11.8220	0.748	0.93	0.719069	aurora B kinase
Tb927.7.4200	0.75	1.065	0.71904	hypothetical protein, conserved
Tb927.8.5760	0.755	1.437	0.719038	Ankyrin repeats (many copies)/Alpha/beta hydrolase family, putative
Tb927.1.2850	0.761	1.959	0.719011	pteridine transporter, putative
Tb927.10.9250	0.746	0.81	0.719	adenylyl cyclase-associated protein, putative
Tb927.10.5120	0.74	0.495	0.718893	KREPA6
Tb927.10.8710	0.74	0.498	0.718829	centrin-3
Tb927.5.2110	0.741	0.549	0.718772	G-patch domain containing protein, putative
Tb927.3.3610	0.75	1.086	0.718737	peroxisomal targeting signal 2 receptor, putative
Tb927.10.15900	0.736	0.333	0.718688	hypothetical protein, conserved
Tb927.9.15950	0.739	0.459	0.718675	hypothetical protein
Tb927.5.4420	0.76	1.899	0.718659	nucleolar RNA helicase II, putative
Tb927.11.10300	0.752	1.236	0.718647	hypothetical protein, conserved
Tb927.5.1280	0.745	0.774	0.718607	alanine racemase, putative
Tb927.4.1020	0.755	1.473	0.71859	serine-palmitoyl-CoA transferase, putative
Tb927.5.2080	0.755	1.476	0.718553	GMP reductase
Tb927.5.1090	0.765	2.4	0.718524	threonyl-tRNA synthetase, putative
Tb927.10.15180	0.75	1.101	0.718521	nucleosome assembly protein, putative
Tb927.9.11230	0.738	0.426	0.718419	calmodulin-like protein, putative
Tb927.8.7500	0.742	0.621	0.718359	hypothetical protein, conserved
Tb927.9.11580	0.744	0.732	0.718333	glycosomal membrane protein
Tb927.11.15680	0.737	0.39	0.718265	hypothetical protein, conserved
Tb927.11.9140	0.74	0.525	0.718263	mitochondrial RNA binding complex 1 subunit
Tb927.8.5670	0.74	0.525	0.718263	hypothetical protein, conserved
Tb927.7.6900	0.758	1.755	0.718257	Sister chromatid cohesion protein 1
Tb927.7.4180	0.747	0.918	0.718256	fatty acid elongase, putative
Tb927.8.1990	0.743	0.681	0.718243	peroxidoxin
Tb927.10.11150	0.743	0.681	0.718243	hypothetical protein, conserved
Tb927.8.1040	0.738	0.435	0.718214	protein phosphatase inhibitor, putative
Tb927.11.10270	0.745	0.798	0.718201	Golgi SNAP receptor complex member 1, putative
Tb927.10.6030	0.745	0.801	0.71815	proteasome subunit alpha type-1, putative
Tb927.11.7050	0.739	0.486	0.718086	PA domain containing protein, putative
Tb927.1.2880	0.76	1.959	0.718011	pteridine transporter, putative
Tb927.1.2880	0.76	1.959	0.718011	pteridine transporter, putative
Tb927.9.12110	0.754	1.44	0.718	6-phosphogluconate dehydrogenase, decarboxylating
Tb927.10.9550	0.74	0.54	0.717955	hypothetical protein
Tb927.1.1610	0.745	0.813	0.71795	hypothetical protein, conserved
Tb927.10.8190	0.756	1.614	0.717887	T-complex protein 1, theta subunit, putative
Tb927.5.4020	0.745	0.819	0.71785	hypothetical protein
Tb927.11.10880	0.752	1.296	0.717847	hypothetical protein, conserved
Tb927.5.2770	0.751	1.224	0.71781	SET domain containing protein, putative
Tb927.9.8000	0.738	0.453	0.717808	ubiquitin-protein ligase, putative
Tb927.11.12820	0.748	1.014	0.717791	ribonucleoside-diphosphate reductase small chain
Tb927.4.1570	0.747	0.948	0.71779	hypothetical protein, conserved
Tb927.7.2510	0.74	0.549	0.717772	endoplasmatic reticulum retrieval protein, putative
Tb927.10.4310	0.746	0.888	0.71773	prohibitin 2, putative
Tb927.9.11330	0.744	0.768	0.717709	proteasome beta 2 subunit, putative
Tb927.9.11330	0.744	0.768	0.717709	proteasome beta 2 subunit, putative
Tb927.10.13480	0.745	0.828	0.717702	CAMK/CAMKL family protein kinase, putative
Tb927.3.590	0.753	1.389	0.717643	adenosine transporter, putative
Tb927.10.15140	0.736	0.375	0.717629	hypothetical protein, conserved
Tb927.8.5360	0.737	0.417	0.717627	hypothetical protein, conserved
Tb927.8.1370	0.738	0.462	0.717609	hypothetical protein, conserved
Tb927.10.11380	0.75	1.173	0.717508	hypothetical protein, conserved
Tb927.11.16220	0.74	0.564	0.71747	Cytochrome b-c1 complex subunit, putative
Tb927.3.1760	0.744	0.783	0.717454	chaperone protein DnaJ, putative
Tb927.5.930	0.773	3.429	0.717447	NADH-dependent fumarate reductase
Tb927.10.7120	0.747	0.978	0.717332	hypothetical protein, conserved
Tb927.5.2190	0.752	1.341	0.71726	META domain/Domain of unknown function (DUF1935), putative
Tb927.5.2220	0.752	1.341	0.71726	META domain/Domain of unknown function (DUF1935), putative
Tb927.5.2250	0.752	1.341	0.71726	META domain/Domain of unknown function (DUF1935), putative
Tb927.8.1600	0.757	1.755	0.717257	lysyl-tRNA synthetase, putative
Tb927.11.9860	0.734	0.312	0.717243	EF-hand domain pair, putative
Tb927.11.1750	0.747	0.984	0.717241	hypothetical protein, conserved
Tb927.7.4350	0.738	0.48	0.717215	hypothetical protein, conserved
Tb927.11.11250	0.747	0.987	0.717196	cytosolic malate dehydrogenase
Tb927.11.15290	0.744	0.801	0.71715	eRF1 methyltransferase catalytic subunit, putative
Tb927.11.14200	0.743	0.744	0.717123	ubiquitin-conjugating enzyme E2, putative
Tb927.4.1710	0.743	0.744	0.717123	rhodanese-like domain containing protein, putative
Tb927.11.5140	0.746	0.93	0.717069	ubiquitin carboxyl-terminal hydrolase, putative
Tb927.10.5040	0.745	0.873	0.71697	chaperone protein DnaJ, putative
Tb927.9.9000	0.748	1.071	0.716953	isopentenyl-diphosphate delta-isomerase (type II)
Tb927.11.11500	0.756	1.695	0.716942	cyclin dependent kinase-binding protein, putative
Tb927.4.4630	0.735	0.366	0.716851	hypothetical protein, conserved
Tb927.3.3630	0.744	0.825	0.716751	Elongation factor Ts, mitochondrial, putative
Tb927.8.7070	0.746	0.951	0.716744	Flagellum attachment zone protein 15
Tb927.5.1830	0.759	1.986	0.716722	lysosomal/endosomal membrane protein p67
Tb927.5.4560	0.754	1.551	0.716638	guanine deaminase, putative
Tb927.6.4530	0.737	0.462	0.716609	RNA-binding protein, putative
Tb927.10.14010	0.752	1.392	0.716605	tubulin cofactor C domain-containing protein RP2
Tb927.5.286b	0.752	1.392	0.716605	adenosine transporter 1
Tb927.9.3010	0.731	0.231	0.716581	hypothetical protein, conserved
Tb927.5.1170	0.737	0.465	0.716543	hypothetical protein, conserved
Tb927.10.15420	0.749	1.173	0.716508	methyltransferase domain containing protein, putative
Tb927.3.2310	0.745	0.903	0.716492	PACRGA
Tb927.6.4960	0.743	0.786	0.716403	Zinc finger CCCH domain-containing protein 47
Tb927.10.4760	0.742	0.729	0.716386	Integral membrane protein DUF106, putative
Tb927.11.16400	0.746	0.975	0.716377	kinetoplast-associated protein 3, putative
Tb927.11.2810	0.74	0.621	0.716359	Protein of unknown function (DUF3773), putative
Tb927.8.6570	0.741	0.675	0.716352	hypothetical protein, conserved
Tb927.4.4910	0.752	1.413	0.716339	3,2-trans-enoyl-CoA isomerase, mitochondrial precursor, putative
Tb927.11.15810	0.745	0.915	0.716303	NADH-ubiquinone oxidoreductase B22 subunit
Tb927.11.3220	0.748	1.119	0.716265	metacaspase
Tb927.8.2030	0.75	1.266	0.716245	hypothetical protein, conserved
Tb927.8.5730	0.752	1.422	0.716226	STE20-like serine/threonine-protein kinase 1, putative
Tb927.11.15540	0.737	0.48	0.716215	hypothetical protein, conserved
Tb927.4.1730	0.737	0.48	0.716215	hypothetical protein, conserved
Tb927.7.6100	0.737	0.48	0.716215	hypothetical protein
Tb927.4.2060	0.756	1.761	0.716189	Flagellum attachment zone protein 8
Tb927.5.1520	0.752	1.428	0.71615	ATP-dependent protease ATPase subunit HslU1
Tb927.6.4320	0.749	1.2	0.716137	Protein of unknown function (DUF2817), putative
Tb927.2.2390	0.737	0.486	0.716086	hypothetical protein, conserved
Tb927.11.1560	0.746	0.996	0.71606	1,2-Dihydroxy-3-keto-5-methylthiopentene dioxygenase, putative
Tb927.5.4500	0.739	0.585	0.716054	ras-like small GTPase, putative
Tb927.11.11460	0.757	1.872	0.715954	Mitochondrial import receptor subunit ATOM69
Tb927.7.6960	0.747	1.071	0.715953	ubiquitin-conjugating enzyme E2, putative
Tb927.9.3170	0.739	0.591	0.715937	cytochrome oxidase subunit V
Tb927.5.3080	0.746	1.005	0.715925	hypothetical protein, conserved
Tb927.7.3340	0.753	1.533	0.715856	Putative S-adenosyl-L-methionine-dependent methyltransferase, putative
Tb927.7.3180	0.75	1.299	0.715808	adaptor complex AP-1 medium subunit, putative
Tb927.11.16020	0.75	1.302	0.715768	RNA-binding protein, putative
Tb927.10.2810	0.746	1.017	0.715746	hypothetical protein, conserved
Tb927.11.1990	0.759	2.079	0.715744	arginyl-tRNA synthetase, putative
Tb927.11.3090	0.736	0.456	0.715742	LisH domain-containing protein FOPNL, putative
Tb927.11.10740	0.74	0.657	0.715683	vacuolar sorting-associated protein-like, putative
Tb927.11.16830	0.74	0.66	0.715628	Rab-like 5, small G protein
Tb927.7.4700	0.759	2.097	0.715557	WD domain, G-beta repeat, putative
Tb927.11.7900	0.735	0.426	0.715419	mitochondrial RNA binding protein 16
Tb927.10.5290	0.742	0.786	0.715403	NFU3 iron-sulfur cluster scaffold homolog, mitochondrial
Tb927.8.1880	0.738	0.573	0.715291	LSU ribosomal protein, mitochondrial, putative
Tb927.10.5070	0.745	0.981	0.715286	ribonuclease H, putative
Tb927.11.8740	0.734	0.39	0.715265	Protein of unknown function (DUF423), putative
Tb927.11.11290	0.758	2.031	0.715246	heat shock protein 70, putative
Tb927.10.1400	0.739	0.633	0.715132	hypoxanthine-guanine phosphoribosyltransferase
Tb927.3.4130	0.738	0.582	0.715113	hypothetical protein, conserved
Tb927.7.960	0.763	2.55	0.715094	CMGC/SRPK protein kinase, putative
Tb927.2.4580	0.738	0.591	0.714937	UNC119
Tb927.10.9620	0.732	0.333	0.714688	NADH-ubiquinone oxidoreductase c
Tb927.10.1420	0.75	1.392	0.714605	metallo-peptidase, Clan MG, Family M24
Tb927.4.1070	0.738	0.609	0.714588	Mitochondrial ribosomal protein L13
Tb927.11.4460	0.733	0.378	0.714555	ALBA-Domain Protein
Tb927.11.14280	0.738	0.612	0.714531	septum formation protein MAF homologue, putative
Tb927.7.3140	0.737	0.561	0.71453	hypothetical protein, conserved
Tb927.11.15220	0.743	0.906	0.714445	hypothetical protein, conserved
Tb927.5.2940	0.753	1.653	0.714429	stress-induced protein sti1, putative
Tb927.1.3110	0.742	0.846	0.714407	soluble N-ethylmaleimide sensitive factor (NSF) attachment protein, putative
Tb927.10.6600	0.745	1.047	0.714303	hypothetical protein, conserved
Tb927.9.790	0.732	0.348	0.714303	hypothetical protein, conserved
Tb927.7.3310	0.744	0.987	0.714196	Radial spoke head 1 homolog, putative
Tb927.7.4420	0.742	0.861	0.714163	proteasome alpha 3 subunit, putative
Tb927.4.3500	0.736	0.531	0.714139	Amastin surface glycoprotein, putative
Tb927.11.16030	0.747	1.2	0.714137	proteasome regulatory non-ATP-ase subunit 7
Tb927.10.1470	0.738	0.633	0.714132	hypoxanthine-guanine phosphoribosyltransferase
Tb927.11.9480	0.743	0.927	0.714116	tubulin binding cofactor c, putative
Tb927.10.9020	0.75	1.431	0.714113	Gcd10p family, putative
Tb927.11.2500	0.751	1.512	0.714111	Metallocarboxypeptidase 1
Tb927.4.3930	0.749	1.362	0.713989	amino acid transporter, putative
Tb927.11.2260	0.739	0.702	0.713864	Eukaryotic translation initiation factor 4E-1
Tb927.9.7000	0.739	0.702	0.713864	methyltransferase domain containing protein, putative
Tb927.5.4390	0.733	0.408	0.713838	hypothetical protein, conserved
Tb927.10.6950	0.745	1.08	0.713823	sterol 24-c-methyltransferase, putative
Tb927.10.6910	0.745	1.08	0.713823	Sterol methyltransferase, putative
Tb927.4.920	0.74	0.762	0.713812	TPR repeat, putative
Tb927.11.12730	0.734	0.453	0.713808	hypothetical protein, conserved
Tb927.11.13940	0.738	0.651	0.713795	ubiquitin-conjugating enzyme E2, putative
Tb927.10.11160	0.744	1.014	0.713791	NFU2 iron-sulfur cluster scaffold homolog, mitochondrial
Tb927.11.760	0.747	1.227	0.713769	protein phosphatase 2C, putative
Tb927.10.1990	0.762	2.592	0.713701	major vault protein, putative
Tb927.9.14200	0.746	1.161	0.713675	methyltransferase domain containing protein, putative
Tb927.8.5520	0.736	0.555	0.713651	hypothetical protein, conserved
Tb927.11.6160	0.757	2.097	0.713557	eukaryotic release factor 3, putative
Tb927.11.11420	0.727	0.201	0.71355	hypothetical protein
Tb927.10.9150	0.742	0.903	0.713492	hypothetical protein, conserved
Tb927.9.10880	0.739	0.723	0.713491	hypothetical protein, conserved
Tb927.10.7710	0.74	0.783	0.713454	40S ribosomal protein S8, putative
Tb927.8.4540	0.752	1.653	0.713429	PAB1-binding protein , putative
Tb927.11.11750	0.75	1.488	0.713405	membrane-bound acid phosphatase, putative
Tb927.5.3210	0.731	0.345	0.713379	small ubiquitin-related modifier
Tb927.10.3760	0.741	0.852	0.713309	vacuolar ATP synthase subunit d, putative
Tb927.3.4080	0.753	1.752	0.713291	Nodulin-like, putative
Tb927.9.10680	0.743	0.981	0.713286	RNA polymerase III RPC4, putative
Tb927.6.1420	0.733	0.432	0.713282	Uncharacterised protein family (UPF0220), putative
Tb927.3.3660	0.74	0.795	0.713251	NADH-ubiquinone oxidoreductase complex I subunit, putative
Tb927.9.8720	0.744	1.053	0.713215	fructose-1,6-bisphosphatase
Tb927.10.12710	0.76	2.436	0.713177	heat shock protein 110, putative
Tb927.11.1900	0.751	1.59	0.713171	T-complex protein 1, beta subunit, putative
Tb927.1.1630	0.734	0.483	0.713151	transcription elongation factor 1 homolog
Tb927.10.14550	0.754	1.857	0.713118	ATP-dependent RNA helicase HEL67
Tb927.3.3190	0.75	1.512	0.713111	Serine/threonine-protein kinase NEK7, putative
Tb927.10.10140	0.743	0.996	0.71306	paraflagellar rod component, putative
Tb927.10.13720	0.745	1.134	0.713053	RNA-binding protein 29, putative
Tb927.6.4010	0.725	0.159	0.713038	Translation machinery associated TMA7, putative
Tb927.8.2490	0.742	0.933	0.713022	SET domain containing protein, putative
Tb927.3.1090	0.737	0.639	0.713019	U1 small nuclear ribonucleoprotein 24 kDa
Tb927.11.16070	0.743	0.999	0.713015	TFIIH basal transcription factor subunit
Tb927.5.4100	0.749	1.443	0.712963	WD domain, G-beta repeat, putative
Tb927.7.6960	0.744	1.071	0.712953	ubiquitin-conjugating enzyme E2, putative
Tb927.11.6210	0.749	1.446	0.712925	Lanosterol 14-alpha demethylase
Tb927.3.3490	0.74	0.816	0.7129	High mobility group protein TDP1
Tb927.10.1550	0.749	1.449	0.712888	proteasome regulatory non-ATP-ase subunit 5
Tb927.4.1520	0.736	0.594	0.712879	Pestivirus Npro endopeptidase C53, putative
Tb927.7.3370	0.753	1.791	0.712852	Intraflagellar transport protein 74, putative
Tb927.10.11990	0.737	0.648	0.71285	RNA-binding protein
Tb927.3.1410	0.734	0.498	0.712829	cytochrome oxidase subunit VII
Tb927.2.2450	0.747	1.299	0.712808	ribosomal RNA methyltransferase, putative
Tb927.10.6290	0.75	1.539	0.712783	ATP-dependent DEAD/H RNA helicase, putative
Tb927.10.7660	0.732	0.411	0.712767	hypothetical protein
Tb927.11.7430	0.732	0.411	0.712767	hypothetical protein, conserved
Tb927.10.1130	0.74	0.825	0.712751	dynein arm light chain, axonemal, putative
Tb927.8.1820	0.746	1.23	0.712728	sterol carrier protein, putative
Tb927.11.16480	0.744	1.089	0.712693	enoyl-CoA hydratase/isomerase family protein, putative
Tb927.10.16180	0.74	0.831	0.712652	hypothetical protein, conserved
Tb927.6.590	0.729	0.297	0.712651	hypothetical protein, conserved
Tb927.11.15780	0.729	0.297	0.712651	hypothetical protein, conserved
Tb927.9.5410	0.741	0.894	0.712635	hypothetical protein, conserved
Tb927.9.9840	0.732	0.417	0.712627	lipoic acid containing carrier protein, putative
Tb927.5.1060	0.749	1.47	0.712627	mitochondrial processing peptidase, beta subunit, putative
Tb927.3.4410	0.737	0.663	0.712573	pre-RNA processing PIH1/Nop17, putative
Tb927.11.4550	0.741	0.9	0.71254	Domain of unknown function (DUF4200), putative
Tb927.11.7100	0.736	0.612	0.712531	cytoplasmic translation machinery associated protein, putative
Tb927.10.12880	0.747	1.323	0.712493	SET domain containing protein, putative
Tb927.10.13830	0.738	0.723	0.712491	chaperone protein DnaJ, putative
Tb927.11.11200	0.75	1.566	0.712458	oligomeric golgi complex component 8, putative
Tb927.11.5090	0.746	1.254	0.712405	aspartate aminotransferase, mitochondrial
Tb927.8.3210	0.734	0.519	0.712388	hypothetical protein, conserved
Tb927.7.5340	0.749	1.497	0.712294	hypothetical protein, conserved
Tb927.5.2040	0.742	0.981	0.712286	hypothetical protein, conserved
Tb927.1.2260	0.731	0.39	0.712265	small myristoylated protein 1-2
Tb927.3.1890	0.74	0.855	0.71226	cytochrome c oxidase assembly protein, putative
Tb927.7.2540	0.737	0.681	0.712243	ubiquitin-protein ligase, putative
Tb927.11.13140	0.73	0.351	0.712226	cytochrome oxidase subunit X
Tb927.4.5130	0.739	0.798	0.712201	KH domain/Domain of unknown function (DUF1771)/Smr domain containing protein, putative
Tb927.8.5070	0.731	0.393	0.712193	hypothetical protein, conserved
Tb927.8.6850	0.74	0.861	0.712163	Zinc finger, C3HC4 type (RING finger)/EF-hand domain pair, putative
Tb927.2.5830	0.741	0.924	0.712163	hypothetical protein, conserved
Tb927.8.5290	0.753	1.854	0.712151	WW domain containing protein, putative
Tb927.11.9580	0.731	0.396	0.712121	hypothetical protein, conserved
Tb927.4.4120	0.731	0.399	0.71205	Cleavage stimulating factor 64, putative
Tb927.7.3200	0.743	1.065	0.71204	hypothetical protein, conserved
Tb927.9.6910	0.733	0.489	0.712021	hypothetical protein, conserved
Tb927.9.5330	0.744	1.143	0.711927	Putative papain-like cysteine peptidase (DUF1796), putative
Tb927.10.4240	0.73	0.363	0.711925	hypothetical protein, conserved
Tb927.9.11720	0.734	0.543	0.711893	Iron-sulfur cluster assembly protein
Tb927.8.4580	0.748	1.452	0.71185	Basal body protein
Tb927.10.1390	0.737	0.705	0.711811	hypoxanthine-guanine phosphoribosyltransferase, putative
Tb927.10.14060	0.726	0.225	0.71177	hypothetical protein
Tb927.11.15030	0.735	0.6	0.711762	small GTPase
Tb927.8.5920	0.735	0.6	0.711762	hypothetical protein
Tb927.6.4490	0.733	0.504	0.711702	hypothetical protein, conserved
Tb927.7.4620	0.739	0.828	0.711702	hypothetical protein, conserved
Tb927.9.1680	0.739	0.834	0.711603	Lys-63-specific deubiquitinase BRCC36, putative
Tb927.7.3620	0.755	2.094	0.711588	tyrosyl-tRNA synthetase, putative
Tb927.11.900	0.745	1.242	0.711566	isocitrate dehydrogenase, putative
Tb927.6.2490	0.737	0.723	0.711491	succinate dehydrogenase subunit 7
Tb927.2.3190	0.732	0.468	0.711477	Got1/Sft2-like family, putative
Tb927.3.3260	0.741	0.969	0.711469	hypothetical protein, conserved
Tb927.11.11770	0.746	1.329	0.711415	Eukaryotic translation initiation factor 4E-3
Tb927.11.7260	0.726	0.237	0.711395	hypothetical protein, conserved
Tb927.8.3380	0.737	0.729	0.711386	succinate dehydrogenase iron-sulfur subunit
Tb927.3.970	0.743	1.113	0.71135	Mitochondrial SSU ribosomal protein, putative
Tb927.7.280	0.736	0.678	0.711298	cyclophilin-type peptidyl-prolyl cis-trans isomerase, putative
Tb927.8.4220	0.736	0.678	0.711298	hypothetical protein, conserved
Tb927.10.8580	0.734	0.573	0.711291	ADP-ribosylation factor-like protein
Tb927.11.11580	0.745	1.263	0.711285	hypothetical protein, conserved
Tb927.10.14780	0.739	0.855	0.71126	mitogen-activated protein kinase kinase kinase, putative
Tb927.1.1470	0.751	1.758	0.711223	conserved protein, unknown function
Tb927.4.5140	0.738	0.798	0.711201	repressor of RNA polymerase III transcription MAF1
Tb927.8.6970	0.754	2.037	0.711183	3-methylcrotonyl-CoA carboxylase alpha subunit, putative
Tb927.8.1140	0.742	1.056	0.711171	hypothetical protein, conserved
Tb927.11.12960	0.727	0.279	0.711154	hypothetical protein, conserved
Tb927.9.3840	0.729	0.354	0.711151	hypothetical protein, conserved
Tb927.3.3750	0.733	0.531	0.711139	paraflagellar rod component, putative
Tb927.5.1660	0.745	1.278	0.711085	protein phosphatase 2C, putative
Tb927.10.5770	0.757	2.343	0.711079	Valosin-containing protein
Tb927.4.4870	0.746	1.356	0.711066	amino acid transporter, putative
Tb927.11.15060	0.73	0.399	0.71105	hypothetical protein, conserved
Tb927.10.12270	0.738	0.807	0.71105	methyltransferase domain containing protein, putative
Tb927.10.14250	0.739	0.87	0.711018	hypothetical protein, conserved
Tb927.9.3620	0.736	0.696	0.710972	hypothetical protein, conserved
Tb927.10.5230	0.738	0.813	0.71095	ADP-ribosylation factor, putative
Tb927.11.2980	0.735	0.645	0.710906	hypothetical protein, conserved
Tb927.7.3410	0.731	0.45	0.710875	centrin-4
Tb927.10.1860	0.742	1.083	0.71078	hypothetical protein, conserved
Tb927.9.7670	0.736	0.708	0.710757	hypothetical protein, conserved
Tb927.10.6840	0.739	0.888	0.71073	hypothetical protein, conserved
Tb927.8.1500	0.751	1.806	0.710684	hypothetical protein, conserved
Tb927.8.3850	0.743	1.161	0.710675	PSP1 C-terminal conserved region, putative
Tb927.11.1540	0.744	1.236	0.710647	isovaleryl-coA dehydrogenase, putative
Tb927.9.7470	0.746	1.389	0.710643	purine nucleoside transporter
Tb927.7.7330	0.744	1.239	0.710607	NADH dehydrogenase (ubiquinone) 1 alpha subcomplex subunit, putative
Tb927.9.9370	0.737	0.774	0.710607	PSP1 C-terminal conserved region, putative
Tb927.6.220	0.746	1.392	0.710605	purine nucleoside transporter
Tb927.10.12000	0.727	0.3	0.710568	iron-sulfur cluster assembly protein, putative
Tb927.2.4760	0.742	1.098	0.710564	hypothetical protein, conserved
Tb927.2.2770	0.729	0.378	0.710555	hypothetical protein, conserved
Tb927.7.5940	0.751	1.818	0.71055	Protein Associated with Differentiation
Tb927.10.4690	0.728	0.339	0.710533	dynein light chain, putative
Tb927.8.2300	0.735	0.666	0.710517	hypothetical protein, conserved
Tb927.2.3800	0.747	1.479	0.710516	guide RNA associated protein 1
Tb927.7.1180	0.732	0.513	0.710513	RNA-binding protein, putative
Tb927.8.3810	0.743	1.173	0.710508	hypothetical protein, conserved
Tb927.10.1070	0.739	0.906	0.710445	cdc2-related kinase 1
Tb927.5.720	0.736	0.726	0.710438	hypothetical protein
Tb927.3.1240	0.74	0.972	0.710423	serine/threonine-protein phosphatase
Tb927.10.8090	0.731	0.471	0.710411	hypothetical protein, conserved
Tb927.11.16810	0.744	1.257	0.710365	dynein light intermediate chain D1bLIC, putative
Tb927.10.14760	0.733	0.57	0.71035	clathrin light chain, putative
Tb927.6.4820	0.737	0.792	0.710302	chromosomal passenger complex protein 1
Tb927.8.6110	0.747	1.5	0.710258	3-hydroxy-3-methylglutaryl-CoA synthase, putative
Tb927.1.3150	0.739	0.918	0.710256	hypothetical protein, conserved
Tb927.10.15820	0.737	0.795	0.710251	hypothetical protein, conserved
Tb927.3.4100	0.75	1.758	0.710223	Nodulin-like, putative
Tb927.11.8190	0.742	1.122	0.710223	DNA repair protein RAD51
Tb927.11.11740	0.747	1.503	0.710221	membrane-bound acid phosphatase, putative
Tb927.9.5900	0.762	2.979	0.710221	glutamate dehydrogenase
Tb927.5.3740	0.731	0.48	0.710215	RING-H2 zinc finger, putative
Tb927.8.7250	0.737	0.798	0.710201	repressor of RNA polymerase III transcription MAF1
Tb927.8.1870	0.751	1.851	0.710185	Golgi/lysosome glycoprotein 1
Tb927.10.8530	0.748	1.59	0.710171	glucose transporter 2A
Tb927.10.8500	0.748	1.59	0.710171	glucose transporter, putative
Tb927.10.8510	0.748	1.59	0.710171	glucose transporter, putative
Tb927.10.8520	0.748	1.59	0.710171	glucose transporter, putative
Tb927.10.8210	0.75	1.764	0.710155	KREPA2
Tb927.6.1900	0.746	1.428	0.71015	essential nuclear protein 1, putative
Tb927.10.6970	0.758	2.553	0.710066	serine peptidase, Clan SC, Family S9B
Tb927.10.6940	0.758	2.553	0.710066	Dipeptidyl-peptidase 8-like, putative
Tb927.11.12850	0.754	2.148	0.710032	oligopeptidase b
Tb927.2.5890	0.745	1.359	0.710027	hypothetical protein, conserved
Tb927.3.3900	0.751	1.866	0.71002	carnitine O-palmitoyltransferase II, putative
Tb927.11.13650	0.728	0.36	0.71	cytochrome b5, putative
Tb927.1.5260	0.732	0.54	0.709955	hypothetical protein
Tb927.3.4090	0.75	1.788	0.709885	Nodulin-like, putative
Tb927.10.2370	0.74	1.008	0.70988	Lupus La protein homolog, putative
Tb927.8.7120	0.745	1.371	0.709873	squalene synthase, putative
Tb927.2.4850	0.736	0.759	0.709864	Phosducin, putative
Tb927.10.5760	0.734	0.648	0.70985	adenylate kinase, putative
Tb927.4.2110	0.739	0.945	0.709837	protein phosphatase 2C, putative
Tb927.4.1130	0.731	0.498	0.709829	Complex 1 protein (LYR family), putative
Tb927.10.6640	0.736	0.762	0.709812	transmembrane emp24 domain-containing protein
Tb927.6.3070	0.74	1.014	0.709791	hypothetical protein, conserved
Tb927.9.3000	0.732	0.549	0.709772	cytidine deaminase
Tb927.11.4880	0.737	0.825	0.709751	Calmodulin-binding, putative
Tb927.8.7680	0.746	1.464	0.709701	amino acid transporter, putative
Tb927.10.4810	0.729	0.414	0.709697	hypothetical protein, conserved
Tb927.9.12320	0.743	1.233	0.709688	cystathione gamma lyase, putative
Tb927.11.3710	0.747	1.548	0.709674	hypothetical protein, conserved
Tb927.7.5810	0.736	0.771	0.709658	Protein of unknown function (DUF1637), putative
Tb927.10.8040	0.753	2.088	0.70965	beta adaptin, putative
Tb927.11.15130	0.739	0.96	0.709606	DnaJ homolog, putative
Tb927.9.2010	0.745	1.392	0.709605	kynureninase, putative
Tb927.11.9570	0.738	0.897	0.709587	hypothetical protein, conserved
Tb927.10.4680	0.738	0.897	0.709587	Mutt-Nudix-related hydrolase 5, putative
Tb927.10.6960	0.739	0.963	0.70956	hypothetical protein, conserved
Tb927.10.6850	0.739	0.963	0.70956	Mitochondrial ribosomal protein S18, putative
Tb927.7.1450	0.739	0.966	0.709514	Conserved hypothetical ATP binding protein, putative
Tb927.8.5830	0.74	1.035	0.70948	SMP-30/Gluconolaconase/LRE-like region, putative
Tb927.7.3360	0.741	1.104	0.709479	farnesyl pyrophosphate synthase
Tb927.4.760	0.756	2.406	0.709466	AP-1 adapter complex gamma subunit, putative
Tb927.10.2350	0.736	0.783	0.709454	pyruvate dehydrogenase complex E3 binding protein, putative
Tb927.9.12330	0.731	0.516	0.70945	thioredoxin, putative
Tb927.11.11760	0.74	1.038	0.709435	hypothetical protein, conserved
Tb927.11.6490	0.735	0.732	0.709333	hypothetical protein, conserved
Tb927.10.6320	0.75	1.842	0.709284	CBF/Mak21 family, putative
Tb927.10.7560	0.737	0.855	0.70926	methyltransferase domain containing protein, putative
Tb927.10.8790	0.736	0.798	0.709201	OTU-like cysteine protease, putative
Tb927.7.7460	0.732	0.579	0.709172	hypothetical protein, conserved
Tb927.11.12500	0.74	1.056	0.709171	hypothetical protein, conserved
Tb927.10.8490	0.747	1.59	0.709171	glucose transporter, putative
Tb927.3.1690	0.729	0.438	0.709146	Mitochondrial ATP synthase subunit, putative
Tb927.10.3200	0.735	0.744	0.709123	U2 splicing auxiliary factor, putative
Tb927.4.720	0.726	0.318	0.709083	hypothetical protein, conserved
Tb927.9.12730	0.744	1.356	0.709066	chaperone protein DnaJ, putative
Tb927.8.3360	0.728	0.399	0.70905	hypothetical protein, conserved
Tb927.11.10460	0.738	0.933	0.709022	dna replication complex gins protein psf2
Tb927.11.4560	0.737	0.87	0.709018	hypothetical protein, conserved
Tb927.7.6830	0.743	1.284	0.709006	trans-sialidase, putative
Tb927.6.4650	0.74	1.071	0.708953	UV excision repair RAD23 protein, putative
Tb927.2.4090	0.736	0.813	0.70895	signal recognition particle receptor beta subunit, putative
Tb927.5.3830	0.738	0.942	0.708883	dihydroorotate oxidase
Tb927.11.16300	0.74	1.077	0.708866	hypothetical protein, conserved
Tb927.5.1270	0.733	0.648	0.70885	Acidic leucine-rich nuclear phosphoprotein 32 family member
Tb927.5.1930	0.733	0.648	0.70885	signal peptidase subunit, putative
Tb927.10.8540	0.739	1.011	0.708835	chaperone protein DnaJ, putative
Tb927.5.1350	0.739	1.011	0.708835	hypothetical protein, conserved
Tb927.11.16870	0.73	0.498	0.708829	NADH-ubiquinone oxidoreductase B8 subunit
Tb927.8.5960	0.73	0.498	0.708829	hypothetical protein, conserved
Tb927.8.730	0.735	0.762	0.708812	nucleolar RNA-binding protein, putative
Tb927.9.10520	0.735	0.762	0.708812	hypothetical protein, conserved
Tb927.3.4730	0.741	1.152	0.708801	leucine-rich repeat-containing protein
Tb927.3.4770	0.741	1.152	0.708801	leucine-rich repeat-containing protein
Tb927.11.4720	0.731	0.549	0.708772	hypothetical protein, conserved
Tb927.9.14940	0.744	1.38	0.708758	SLACS reverse transcriptase, putative
Tb927.3.4990	0.739	1.02	0.708701	oxidoreductase, putative
Tb927.5.3110	0.733	0.657	0.708683	Mitochondrial ribosomal protein L49
Tb927.9.13460	0.729	0.459	0.708675	Spt4/RpoE2 zinc finger, putative
Tb927.6.2700	0.724	0.261	0.708674	small nuclear ribonucleoprotein Sm-E
Tb927.2.6150	0.744	1.389	0.708643	adenosine transporter 2
Tb927.10.12570	0.726	0.339	0.708533	hypothetical protein
Tb927.4.3680	0.736	0.84	0.708505	protein phosphatase 2C, putative
Tb927.4.970	0.733	0.669	0.708462	hypothetical protein, conserved
Tb927.11.7040	0.726	0.342	0.708456	pterin-4-alpha-carbinolamine dehydratase, putative
Tb927.8.7620	0.744	1.404	0.708453	amino acid transporter 1, putative
Tb927.9.6890	0.722	0.204	0.70845	hypothetical protein, conserved
Tb927.9.4210	0.752	2.109	0.708433	fatty acyl CoA synthetase 3
Tb927.1.4490	0.73	0.519	0.708388	acetyltransferase, putative
Tb927.7.3220	0.732	0.621	0.708359	ChaC-like protein, putative
Tb927.11.12940	0.741	1.185	0.708343	Uncharacterised protein family (UPF0160), putative
Tb927.3.3280	0.743	1.335	0.708337	vacuolar protein sorting-associated protein 4, putative
Tb927.9.7710	0.731	0.576	0.708232	hypothetical protein, conserved
Tb927.8.1800	0.745	1.506	0.708184	Eukaryotic membrane protein family, putative
Tb927.7.1110	0.739	1.056	0.708171	asparagine synthetase a, putative
Tb927.11.4420	0.746	1.59	0.708171	hypothetical protein, conserved
Tb927.8.7180	0.733	0.687	0.708134	hypothetical protein, conserved
Tb927.4.2170	0.727	0.396	0.708121	hypothetical protein, conserved
Tb927.7.2700	0.736	0.864	0.708115	NADH-cytochrome b5 reductase, putative
Tb927.1.860	0.735	0.807	0.70805	transmembrane protein, putative
Tb927.11.16900	0.739	1.065	0.70804	hypothetical protein
Tb927.7.1500	0.736	0.87	0.708018	Cytosolic Fe-S cluster assembly factor CFD1, putative
Tb927.3.3910	0.739	1.068	0.707997	DNA-directed RNA polymerase III subunit RPC6
Tb927.8.4050	0.753	2.253	0.70797	FLA1-binding protein
Tb927.8.4100	0.753	2.253	0.70797	FLA1-binding protein
Tb927.11.7240	0.745	1.524	0.707965	nexin-dynein regulatory complex 2
Tb927.10.13520	0.746	1.608	0.707958	Zn-finger in Ran binding protein and others/FYVE zinc finger, putative
Tb927.9.7810	0.728	0.447	0.707943	hypothetical protein, conserved
Tb927.7.5620	0.742	1.29	0.707927	SET domain containing protein, putative
Tb927.1.3280	0.734	0.756	0.707916	septum formation protein MAF homologue, putative
Tb927.6.3870	0.732	0.645	0.707906	RNA-binding protein, putative
Tb927.7.6170	0.732	0.645	0.707906	Protein of unknown function (DUF3522), putative
Tb927.8.7790	0.726	0.366	0.707851	zinc finger domain, LSD1 subclass, putative
Tb927.1.1990	0.731	0.597	0.70782	Pre-mRNA-splicing factor 38, putative
Tb927.5.3560	0.732	0.651	0.707795	vesicle-associated membrane protein, putative
Tb927.7.6620	0.746	1.623	0.707781	Probable N6-adenine methyltransferase, putative
Tb927.3.3010	0.722	0.225	0.70777	hypothetical protein, conserved
Tb927.8.6810	0.742	1.302	0.707768	STE/STE11 serine/threonine-protein kinase, putative
Tb927.8.2270	0.731	0.6	0.707762	Present in the outer mitochondrial membrane proteome 39-3
Tb927.4.1270	0.743	1.38	0.707758	ruvB-like DNA helicase, putative
Tb927.4.3480	0.73	0.552	0.707711	hypothetical protein
Tb927.8.7700	0.744	1.464	0.707701	amino acid transporter, putative
Tb927.11.3620	0.742	1.308	0.70769	nucleobase/nucleoside transporter 8.1
Tb927.6.1540	0.74	1.161	0.707675	Yip1 domain containing protein, putative
Tb927.9.3550	0.723	0.261	0.707674	hypothetical protein, conserved
Tb927.3.780	0.733	0.714	0.70765	proteasome alpha 7 subunit
Tb927.11.14300	0.748	1.809	0.70765	Dynein intermediate chain, axonemal
Tb927.7.2240	0.746	1.635	0.70764	hypothetical protein, conserved
Tb927.8.4790	0.733	0.717	0.707597	Putative snoRNA binding domain containing protein, putative
Tb927.10.14100	0.727	0.42	0.707558	hypothetical protein, conserved
Tb927.6.1520	0.737	0.966	0.707514	Aquaglyceroporin 1
Tb927.11.4860	0.743	1.401	0.707491	Ring finger domain containing protein, putative
Tb927.8.7670	0.743	1.401	0.707491	amino acid transporter, putative
Tb927.3.2420	0.726	0.381	0.707482	Microsomal signal peptidase 12 kDa subunit (SPC12), putative
Tb927.10.15860	0.728	0.471	0.707411	hypothetical protein, conserved
Tb927.11.15950	0.744	1.488	0.707405	amino acid transporter, putative
Tb927.11.5010	0.739	1.11	0.707393	TFIIF-stimulated CTD phosphatase, putative
Tb927.5.2430	0.745	1.572	0.707386	membrane transporter protein, putative
Tb927.5.1900	0.748	1.833	0.707384	hypothetical protein, conserved
Tb927.8.3110	0.742	1.332	0.707376	Mitochondrial ribosomal protein S9
Tb927.10.9830	0.728	0.474	0.707346	Mitochondrial ATP synthase subunit, putative
Tb927.10.7950	0.725	0.348	0.707303	hypothetical protein
Tb927.10.14490	0.741	1.263	0.707285	hypothetical protein, conserved
Tb927.6.3770	0.731	0.627	0.707245	hypothetical protein, conserved
Tb927.3.4190	0.749	1.938	0.707236	endosomal integral membrane protein, putative
Tb927.11.15550	0.736	0.927	0.707116	NADH-cytochrome b5 reductase, putative
Tb927.4.4830	0.742	1.353	0.707104	amino acid transporter, putative
Tb927.4.4850	0.742	1.353	0.707104	amino acid transporter, putative
Tb927.6.1550	0.738	1.062	0.707084	Leucine-rich repeat, ribonuclease inhibitor subtype domain-containing protein
Tb927.8.1650	0.747	1.776	0.70702	Protein Associated with Differentiation, putative
Tb927.3.1870	0.733	0.75	0.707019	CHAP domain containing protein, putative
Tb927.8.3320	0.74	1.209	0.707014	Mitochondrial ATP synthase subunit, putative
Tb927.3.3520	0.741	1.284	0.707006	Present in the outer mitochondrial membrane proteome 25
Tb927.3.3720	0.725	0.36	0.707	Golgi vesicular membrane trafficking protein, putative
Tb927.10.15590	0.73	0.591	0.706937	macrophage infectivity potentiator, precursor, putative
Tb927.2.4800	0.738	1.074	0.70691	hypothetical protein, conserved
Tb927.6.700	0.758	2.901	0.706903	alanyl-tRNA synthetase, putative
Tb927.3.3250	0.737	1.011	0.706835	hypothetical protein, conserved
Tb927.4.3670	0.742	1.374	0.706835	CBF/Mak21 family, putative
Tb927.6.4050	0.734	0.822	0.706801	zinc finger ccch domain-containing protein 14
Tb927.8.4710	0.742	1.377	0.706796	amino acid transporter, putative
Tb927.8.4730	0.742	1.377	0.706796	amino acid transporter, putative
Tb927.10.14500	0.737	1.014	0.706791	hypothetical protein, conserved
Tb927.9.8450	0.73	0.603	0.706704	UMP/CMP kinase
Tb927.5.4410	0.731	0.657	0.706683	hypothetical protein, conserved
Tb927.10.12990	0.735	0.891	0.706682	predicted ankyrin repeat family protein
Tb927.7.6090	0.752	2.289	0.706612	eukaryotic translation initiation factor 3 subunit a
Tb927.11.16430	0.727	0.462	0.706609	18 kDa ER-associated protein
Tb927.11.6610	0.738	1.095	0.706607	hypothetical protein, conserved
Tb927.11.6290	0.733	0.774	0.706607	HIT zinc finger, putative
Tb927.7.1600	0.735	0.897	0.706587	C-1-tetrahydrofolate synthase, cytoplasmic, putative
Tb927.10.3860	0.731	0.663	0.706573	SNF-7-like protein, putative
Tb927.11.3980	0.744	1.557	0.706566	metallo-peptidase, Clan ME, Family M16
Tb927.3.4650	0.731	0.666	0.706517	C-8 sterol isomerase, putative
Tb927.8.7650	0.742	1.401	0.706491	amino acid transporter, putative
Tb927.9.15010	0.73	0.615	0.706473	NADH dehydrogenase (ubiquinone) 1 beta subcomplex subunit, putative
Tb927.8.6390	0.734	0.843	0.706455	lysophospholipase, putative
Tb927.11.10970	0.733	0.783	0.706454	RWD domain/Uncharacterized protein family UPF0029, putative
Tb927.10.5940	0.743	1.485	0.706442	NEK family Serine/threonine-protein kinase, putative
Tb927.11.8050	0.744	1.572	0.706386	Sas10/Utp3/C1D family/Sas10 C-terminal domain containing protein, putative
Tb927.8.2510	0.732	0.729	0.706386	hypothetical protein, conserved
Tb927.8.4070	0.732	0.729	0.706386	zinc finger protein family member, putative
Tb927.8.4120	0.732	0.729	0.706386	zinc finger protein family member, putative
Tb927.8.5120	0.724	0.345	0.706379	cytochrome c
Tb927.11.13490	0.738	1.116	0.706308	hypothetical protein, conserved
Tb927.11.8080	0.735	0.915	0.706303	btb/poz domain containing protein, putative
Tb927.10.15270	0.739	1.188	0.706301	metallo- peptidase, Clan MG, Family M24
Tb927.4.2520	0.732	0.735	0.70628	Silent information regulator 2 related protein 3
Tb927.10.3640	0.734	0.855	0.70626	nuclear transmembrane protein, putative
Tb927.4.4170	0.734	0.855	0.70626	rRNA methyltransferase, putative
Tb927.10.7990	0.737	1.05	0.706259	replication factor C subunit 3, putative
Tb927.1.670	0.747	1.845	0.706251	conserved protein, unknown function
Tb927.7.5970	0.746	1.758	0.706223	protein associated with differentiation 5, putative
Tb927.10.15000	0.74	1.269	0.706205	hypothetical protein, conserved
Tb927.7.7340	0.741	1.347	0.706182	hypothetical protein, conserved
Tb927.10.230	0.732	0.741	0.706176	proteasome subunit alpha type-5, putative
Tb927.11.7440	0.729	0.579	0.706172	hypothetical protein, conserved
Tb927.10.3520	0.739	1.2	0.706137	protease regulatory ATPase subunit 4
Tb927.10.9190	0.76	3.234	0.70605	isoleucyl-tRNA synthetase, putative
Tb927.11.670	0.743	1.518	0.706038	epsinR
Tb927.11.1490	0.734	0.87	0.706018	receptor-type adenylate cyclase GRESAG 4, putative (fragment)
Tb927.9.4990	0.729	0.591	0.705937	DNA replication complex GINS protein PSF1
Tb927.11.2360	0.747	1.875	0.705921	phenylalanyl-tRNA synthetase (beta subunit), putative
Tb927.10.16070	0.732	0.756	0.705916	Eukaryotic translation initiation factor 4E-2
Tb927.8.2820	0.765	3.879	0.705914	hypothetical protein, conserved
Tb927.11.6010	0.727	0.495	0.705893	conserved protein, unknown function
Tb927.7.4730	0.74	1.293	0.705887	pumilio/PUF RNA binding protein 5
Tb927.3.4070	0.746	1.788	0.705885	Nodulin-like, putative
Tb927.3.770	0.728	0.546	0.705832	Mitochondrial SSU ribosomal protein, putative
Tb927.10.10640	0.722	0.291	0.705817	hypothetical protein, conserved
Tb927.7.5960	0.746	1.797	0.705784	protein associated with differentiation 4, putative
Tb927.11.7480	0.729	0.6	0.705762	vacuolar type h+ ATPase subunit, putative
Tb927.3.4760	0.748	1.983	0.705754	dynamin-1-like protein
Tb927.8.4550	0.728	0.552	0.705711	Mitochondrial SSU ribosomal protein, putative
Tb927.4.4980	0.727	0.504	0.705702	NADH-ubiquinone oxidoreductase complex I subunit, putative
Tb927.10.8920	0.736	1.02	0.705701	ras-like small GTPase, putative
Tb927.11.3610	0.74	1.308	0.70569	nucleobase/nucleoside transporter 8.1
Tb927.11.2610	0.741	1.386	0.705681	hypothetical protein, conserved
Tb927.10.9900	0.743	1.548	0.705674	ABC1 protein, putative
Tb927.10.13570	0.736	1.026	0.705613	RNA-binding protein, putative
Tb927.10.14080	0.736	1.026	0.705613	RNA-binding protein 27, putative
Tb927.11.3740	0.74	1.314	0.705611	proteasome regulatory ATPase subunit 2
Tb927.10.11350	0.726	0.462	0.705609	LSU ribosomal protein, mitochondrial, putative
Tb927.3.1920	0.746	1.815	0.705583	General negative regulator of transcription subunit 5
Tb927.4.3190	0.73	0.663	0.705573	ubiquitin-conjugating enzyme E2, putative
Tb927.11.11640	0.754	2.607	0.705561	DNA replication licensing factor MCM6
Tb927.10.6920	0.735	0.963	0.70556	hypothetical protein
Tb927.4.4690	0.733	0.837	0.705554	hypothetical protein, conserved
Tb927.8.6040	0.731	0.72	0.705544	kinetoplast ribosomal PPR-repeat containing protein 11
Tb927.9.11700	0.729	0.612	0.705531	hypothetical protein, conserved
Tb927.11.3070	0.745	1.731	0.70553	ribosome assembly protein RRB1, putative
Tb927.7.2260	0.733	0.84	0.705505	SEP domain containing protein, putative
Tb927.10.13810	0.723	0.342	0.705456	hypothetical protein, conserved
Tb927.9.15040	0.733	0.843	0.705455	DTW domain containing protein, putative
Tb927.8.7630	0.741	1.404	0.705453	amino acid transporter 1, putative
Tb927.5.2880	0.728	0.567	0.70541	chaperone protein DnaJ, putative
Tb927.6.2010	0.743	1.572	0.705386	acyl-CoA synthetase, putative
Tb927.8.4020	0.731	0.729	0.705386	Zinc finger CCCH domain-containing protein 24
Tb927.6.1260	0.733	0.849	0.705358	proteasome beta-1 subunit, putative
Tb927.11.6080	0.728	0.57	0.70535	hypothetical protein, conserved
Tb927.8.5990	0.743	1.575	0.70535	NLE (NUC135) domain/WD domain, G-beta repeat, putative
Tb927.10.13600	0.726	0.477	0.70528	hypothetical protein, conserved
Tb927.10.8720	0.744	1.668	0.705255	CCR4-NOT transcription complex subunit 10, putative
Tb927.5.4120	0.728	0.576	0.705232	LSU ribosomal protein, mitochondrial, putative
Tb927.11.8260	0.739	1.269	0.705205	carbonic anhydrase-like protein
Tb927.7.4880	0.73	0.684	0.705189	hypothetical protein, conserved
Tb927.10.4050	0.744	1.674	0.705185	serine palmitoyltransferase, putative
Tb927.6.600	0.736	1.056	0.705171	ccr4-not transcription complex subunit
Tb927.11.12200	0.721	0.279	0.705154	hypothetical protein, conserved
Tb927.7.2190	0.732	0.801	0.70515	translocon-associated protein (TRAP), alpha subunit, putative
Tb927.9.8380	0.725	0.438	0.705146	hypothetical protein, conserved
Tb927.10.13780	0.736	1.059	0.705128	glycogen synthase kinase 3
Tb927.11.200	0.724	0.396	0.705121	DNA-directed RNA polymerase I subunit, putative
Tb927.7.2530	0.734	0.927	0.705116	N-acetyltransferase, putative
Tb927.3.1260	0.728	0.582	0.705113	hypothetical protein, conserved
Tb927.7.5260	0.728	0.582	0.705113	Cytochrome c oxidase biogenesis protein Cmc1 like, putative
Tb927.3.2030	0.721	0.282	0.705069	acylphosphatase, putative
Tb927.7.6800	0.737	1.137	0.705011	LSU ribosomal protein, mitochondrial, putative
Tb927.11.5600	0.723	0.36	0.705	Archaic Translocase of outer membrane 14 kDa subunit
Tb927.5.1300	0.751	2.352	0.704991	V-type proton ATPase subunit a, putative
Tb927.1.1150	0.741	1.443	0.704963	zeta tubulin
Tb927.8.7050	0.74	1.365	0.70495	mu-adaptin 4, putative
Tb927.11.11050	0.735	1.005	0.704925	hypothetical protein, conserved
Tb927.10.9270	0.73	0.699	0.704918	emp24/gp25L/p24 family/GOLD, putative
Tb927.11.3120	0.747	1.968	0.704914	nucleolar GTP-binding protein 1
Tb927.6.3240	0.732	0.816	0.7049	hypothetical protein, conserved
Tb927.10.1740	0.737	1.149	0.704843	hypothetical protein, conserved
Tb927.11.2910	0.737	1.152	0.704801	phosphoglycerate mutase, putative
Tb927.8.4700	0.74	1.377	0.704796	amino acid transporter, putative
Tb927.8.4740	0.74	1.377	0.704796	amino acid transporter, putative
Tb927.5.1140	0.746	1.887	0.70479	choline/ethanolamine kinase
Tb927.11.11210	0.736	1.083	0.70478	paraflagellar rod component, putative
Tb927.11.9960	0.733	0.885	0.704778	Protein of unknown function (DUF2870), putative
Tb927.11.16600	0.733	0.885	0.704778	exosome-associated protein 2
Tb927.11.10040	0.723	0.369	0.704776	hypothetical protein, conserved
Tb927.8.2260	0.728	0.6	0.704762	Present in the outer mitochondrial membrane proteome 39-2
Tb927.8.2280	0.728	0.6	0.704762	Present in the outer mitochondrial membrane proteome 39-4
Tb927.4.2440	0.737	1.155	0.704759	SET domain containing protein, putative
Tb927.11.5510	0.73	0.708	0.704757	dynein light chain p28, axonemal, putative
Tb927.7.4710	0.733	0.891	0.704682	Mitochondrial ribosomal protein L46
Tb927.6.660	0.745	1.812	0.704617	hypothetical protein, conserved
Tb927.10.5930	0.741	1.473	0.70459	NEK family Serine/threonine-protein kinase, putative
Tb927.10.12330	0.728	0.609	0.704588	zinc finger protein family member, putative
Tb927.10.6390	0.733	0.897	0.704587	hypothetical protein, conserved
Tb927.10.1030	0.74	1.395	0.704567	serine peptidase, Clan SC, Family S10
Tb927.7.7500	0.734	0.963	0.70456	thymine-7-hydroxylase, putative
Tb927.10.6570	0.734	0.963	0.70456	TPR repeat, putative
Tb927.3.3710	0.731	0.777	0.704556	Scavenger mRNA decapping enzyme C-term binding, putative
Tb927.11.8900	0.728	0.612	0.704531	DPCD protein family, putative
Tb927.9.13520	0.754	2.727	0.704459	Importin 1
Tb927.9.4230	0.748	2.109	0.704433	fatty acyl CoA synthetase 4
Tb927.6.1210	0.728	0.618	0.704416	kinetoplastid kinetochore protein 6
Tb927.6.1830	0.739	1.329	0.704415	Cleavage stimulation factor subunit 50, putative
Tb927.9.5960	0.727	0.567	0.70441	succinate dehydrogenase iron-sulfur subunit, putative
Tb927.10.11700	0.728	0.621	0.704359	guanylate kinase, putative
Tb927.8.2000	0.731	0.789	0.704352	cyclophilin, putative
Tb927.10.7940	0.736	1.113	0.70435	methyltransferase, putative
Tb927.11.6280	0.754	2.742	0.704323	pyruvate phosphate dikinase
Tb927.10.14160	0.733	0.915	0.704303	Aquaglyceroporin 3
Tb927.7.6270	0.738	1.263	0.704285	peptidase t, putative
Tb927.3.4820	0.733	0.918	0.704256	acyltransferase, putative
Tb927.11.780	0.745	1.845	0.704251	hypothetical protein, conserved
Tb927.7.5990	0.744	1.758	0.704223	protein associated with differentiation 7, putative
[truncated: 6,972 more rows]

## Sheet: Sheet 5. T. vivax CAI set
GeneID	CAI	CDS length [L] (kbp)	Relative predicted expression = CAI*(sqrt-L*0.1)	Product Description
[truncated: 7,836 more rows]

[truncated: 1 more sheets: Sheet 6. L. mexicana CAI set]
