# Supplementary figures and images for: Codon usage bias controls mRNA and protein abundance in trypanosomatids
Source: eLife journal article supplement (doi:10.7554/elife.32496), 2018-03-15

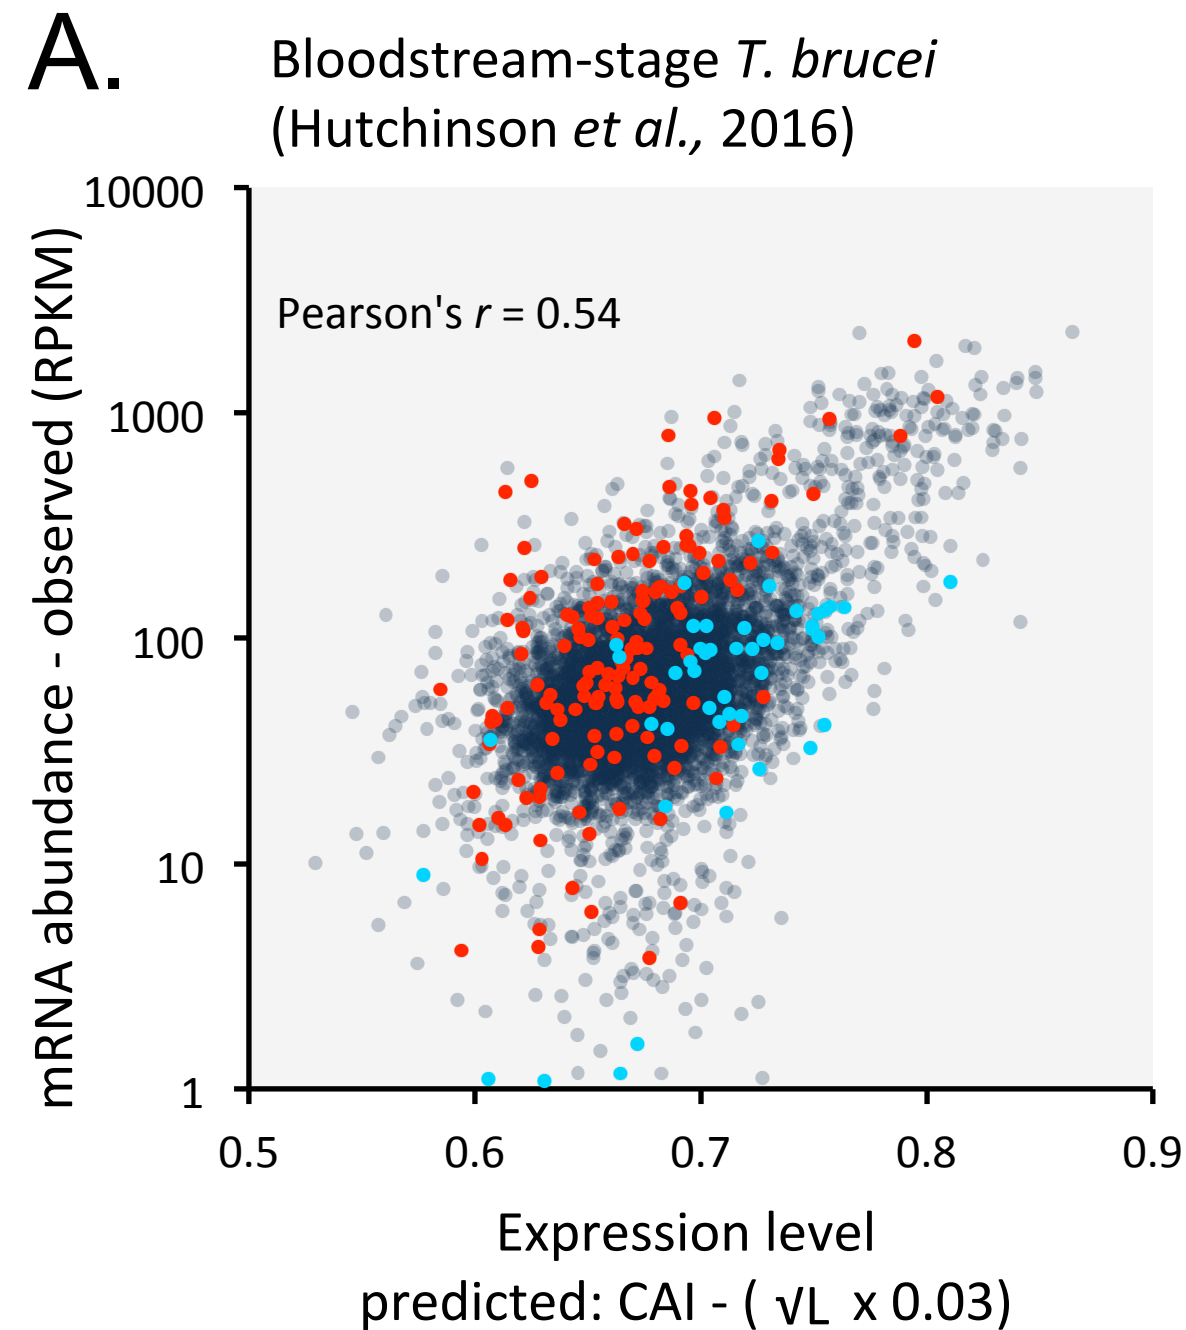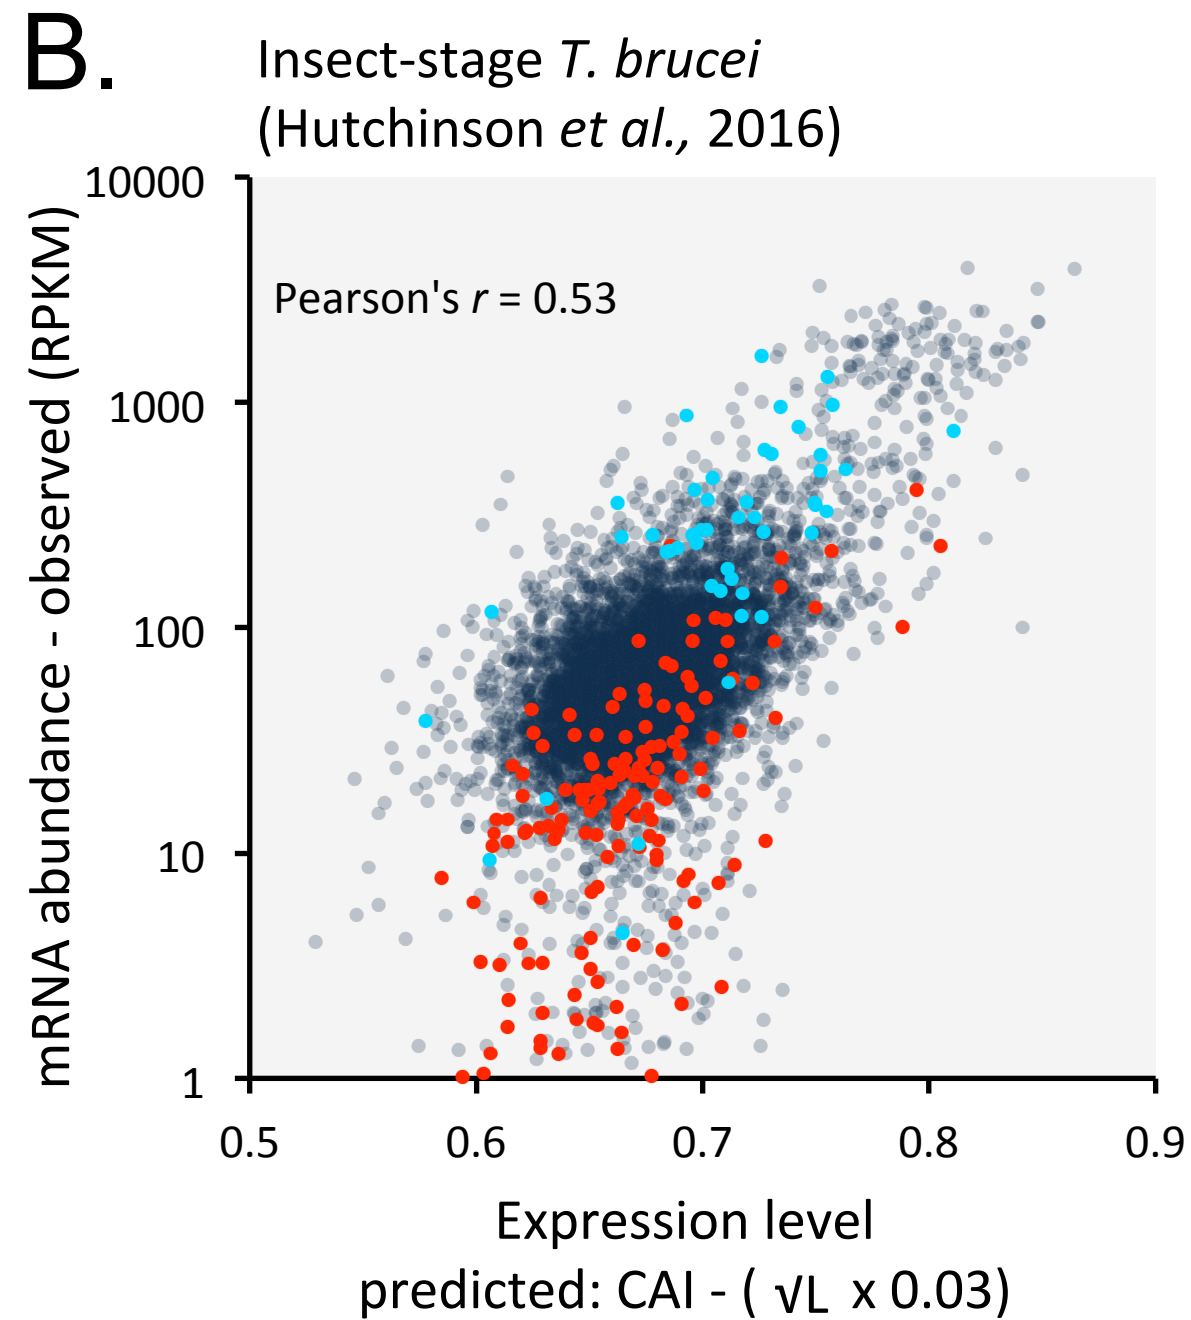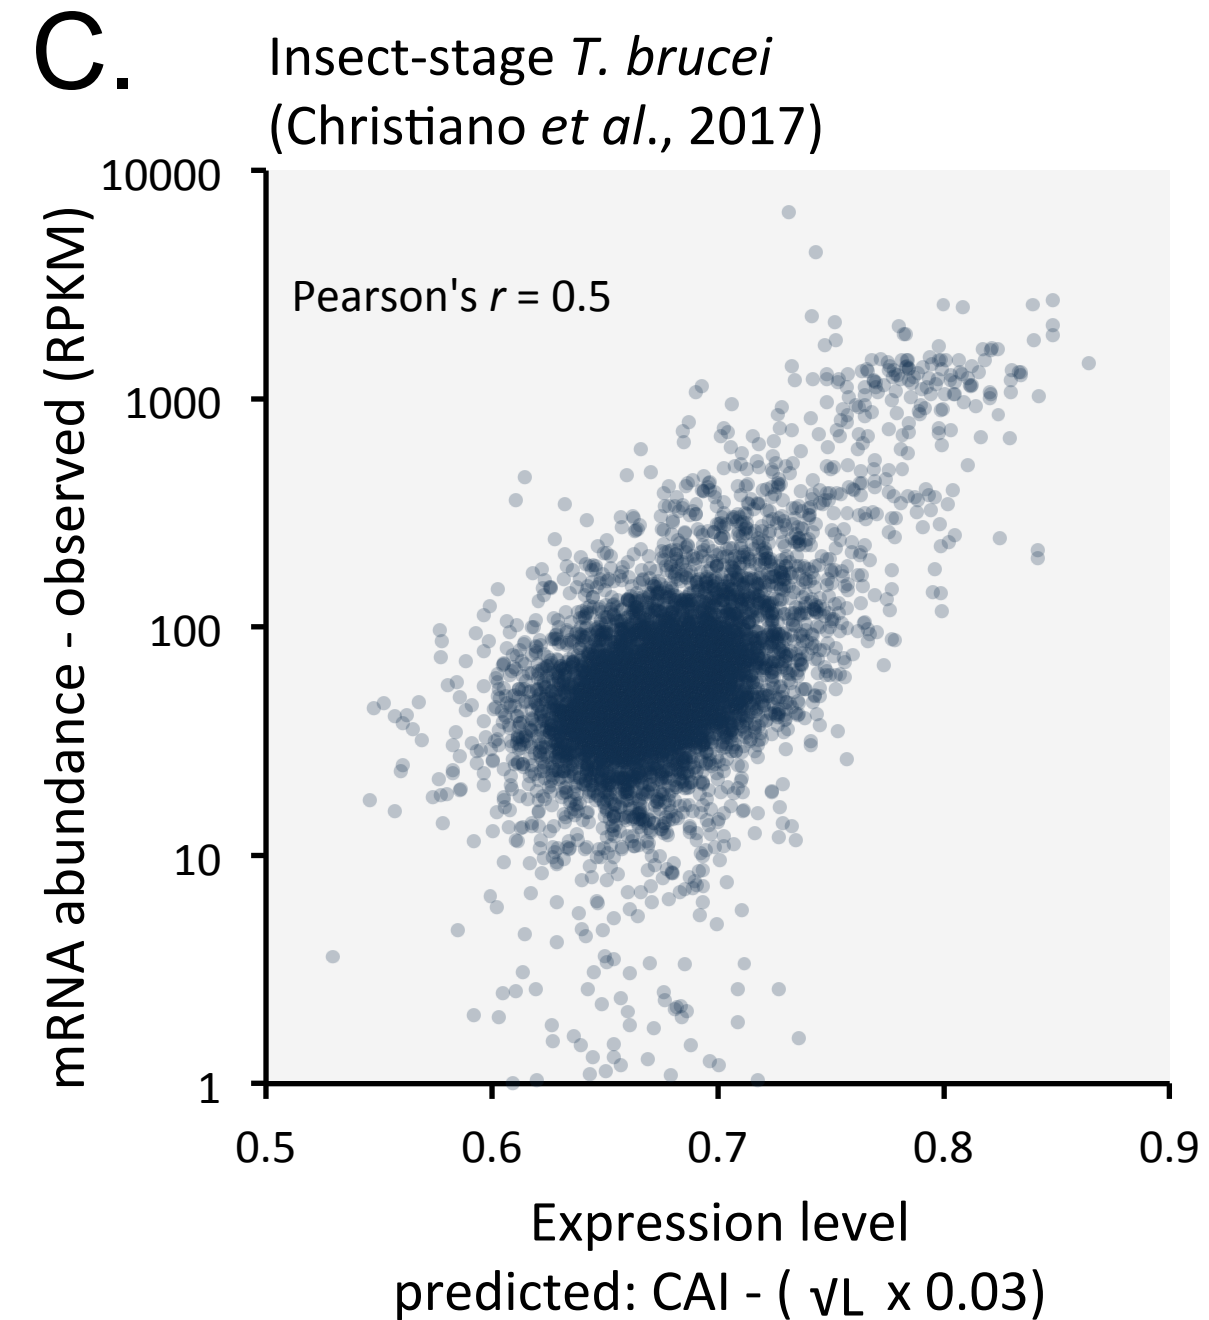

Supplement: supp [file elife-32496-supp-v1.zip › elife_poa_e32496_Figure_6_figure_supplement_1.pdf]

| Sample | Total reads | Reads aligned to CDS features | Percentage of reads aligned to CDS features |
|--------|-------------|-------------------------------|---------------------------------------------|
| 1      | 43,878,780  | 26,194,953                    | 59.70                                       |
| 2      | 69,116,524  | 44,844,281                    | 64.88                                       |
| 3      | 71,093,326  | 43,851,965                    | 61.68                                       |

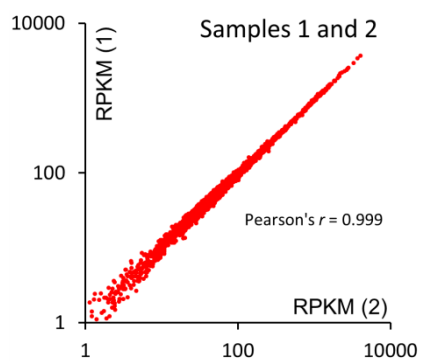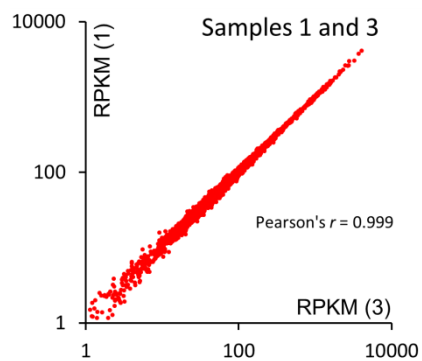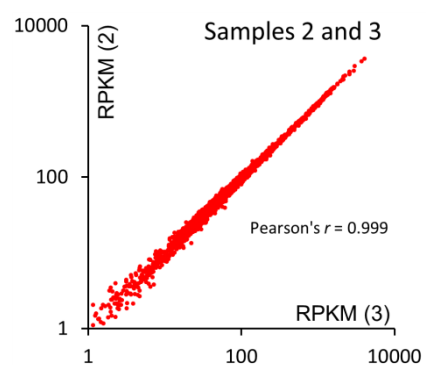

Supplement: supp [file elife-32496-supp-v1.zip › elife_poa_e32496_Figure_5_figure_supplement_1.pdf]
